# Supplementary material for: Unraveling the Genetic Interplay and Therapeutic Potentials between Major Depressive Disorder and Metabolic Syndrome: Multi-Ancestry and Multi-Trait Genome-Wide Association Analyses
Source: Research Square preprint supplement (doi:10.21203/rs.3.rs-4193051/v1), 2024-04-01
Supplement: Supplementary file 1 [file 47dcdb007363f7e461736673.xlsx]

## Sheet: S1
Trait	European		East Asian
	PMID	Samplesize	PMID	Samplesize
High density lipoprotein cholesterol levels	34887591	1320016	38116116	167585
glucose measurement	37679419	458862	38116116	225951
Triglyceride levels	34887591	1320016	38116116	204282
Body mass index	30239722	806834	38116116	256450
HbA1c measurement	34226706	437749	38116116	163836
Low density lipoprotein cholesterol levels	34887591	1320016	38116116	165481
Systolic blood pressure	29892013	469767	38116116	238120
Total cholesterol levels	34887591	1320016	38116116	228423
Diastolic blood pressure	29892013	490469	38116116	238130
Waist circumference	31453325	347158	38116116	92615

## Sheet: S2
Trait	European		East Asian
	PMID	Samplesize	PMID	Samplesize
Alcohol consumption (drinks per week)	30643258	414343	31959922	58610
Coffee consumption	35653391	105037	31959922	152634
Green tea consumption	32193382	448060	31959922	152653
Milk consumption	32193382	427252	31959922	152965
Cheese consumption	32193382	438453	31959922	152714
Fish intake frequency	35653391	308008	31959922	153048
Vegetable consumption	35653391	428979	31959922	153001
Meat consumption	35653391	266042	31959922	152857

## Sheet: S3
Trait	N.Samplesize	λ	LDSC Intercept
MA EUR(A meta-analysis of three EUR MD)	971060	1.17711	1.0977 (0.0089)
MAMT(multi-ancestry and multi-trait meta-analysis for MD)	1353996	1.0412	0.8713 (0.008)
MA(multi-ancestry meta-analysis for MD)	1353996	1.17395	1.0912 (0.0087)
Alcohol consumption	472953	1.23674	1.0152 (0.0089)
Cheese consumption	591167	1.35249	1.0443 (0.0111)
Coffee consumption	257671	1.10758	0.9262 (0.0068)
Fish intake frequency	461056	1.21444	0.9827 (0.0085)
Green tea consumption	600713	1.30098	1.033 (0.0087)
Meat consumption	418899	1.17658	0.9484 (0.0078)
Milk consumption	580217	1.16399	1.03 (0.0079)
Vegetable consumption	581980	1.21552	0.9644 (0.0081)

## Sheet: S4
Phenotype	LDSC
	EUR				EAS
	Genetic Correlation	Z score	Pvalue	FDR	Genetic Correlation	Z score	Pvalue	FDR
Body mass index	0.1619 (0.02)	8.0883	6.0522e-16	3.0261e-15	-0.2432 (0.0585)	-4.1585	3.204e-05	0.00021232
Diastolic blood pressure	-0.0049 (0.0185)	-0.2626	0.7928	0.7928	-0.173 (0.0665)	-2.6017	0.0093	0.0192
glucose measurement	0.0086 (0.0272)	0.3161	0.7519	0.7928	-0.1766 (0.0681)	-2.5917	0.0096	0.0192
HbA1c measurement	-0.007 (0.0254)	-0.2749	0.7834	0.7928	-0.0612 (0.0711)	-0.8608	0.3894	0.48675
High density lipoprotein cholesterol levels	-0.1079 (0.0208)	-5.1739	2.2927e-07	5.73175e-07	0.2139 (0.0825)	2.5937	0.0095	0.0192
Low density lipoprotein cholesterol levels	0.0603 (0.0187)	3.2199	0.0013	0.00216667	0.0263 (0.084)	0.3134	0.754	0.754
Systolic blood pressure	-0.0141 (0.0197)	-0.7172	0.4733	0.676143	-0.2633 (0.0643)	-4.0936	4.2464e-05	0.00021232
Total cholesterol levels	0.0631 (0.0173)	3.6481	0.0003	0.0006	0.0262 (0.0723)	0.3624	0.717	0.754
Triglyceride levels	0.1846 (0.0201)	9.1832	4.1857e-20	4.1857e-19	-0.1418 (0.0779)	-1.8199	0.0688	0.0982857
Waist circumference	0.2545 (0.0342)	7.432	1.0697e-13	3.56567e-13	-0.1666 (0.0793)	-2.1004	0.0357	0.0595

## Sheet: S5
SNV	GenomicLocus	CHR	POS	MAMT.P	nSNPs	A1	nearestGene	func	CADD	RDB
rs3768320	1	1	40032239	2.374e-11	227	C	PABPC4:RP11-69E11.8	ncRNA_intronic	1.381	3a
rs3820615	1	1	40097518	3.976e-09	28	T	HEYL	intronic	9.21	NA
rs58302493	1	1	40033905	1.958e-11	159	A	PABPC4:RP11-69E11.8	ncRNA_intronic	1.149	7
rs12749263	2	1	63028198	6.963e-09	20	C	DOCK7	intronic	3.675	6
rs2182869	2	1	63194650	2.369e-19	146	A	RP11-230B22.1	intergenic	2.127	7
rs56115463	2	1	63005751	1.051e-12	299	A	DOCK7	intronic	0.333	7
rs58583743	2	1	63265523	3.505e-11	104	A	ATG4C	intronic	9.809	6
rs6661669	2	1	63185969	4.803e-25	423	C	RP11-230B22.1	intergenic	0.119	6
rs1392816	3	1	66481188	3.977e-08	60	T	PDE4B	intronic	1.307	7
rs6588183	3	1	66524258	1.138e-08	57	A	PDE4B	intronic	0.734	7
rs12137231	4	1	72735458	7.836e-09	111	C	NEGR1	intronic	1.322	7
rs12748679	4	1	72644585	4.395e-15	80	C	NEGR1	intronic	2.925	7
rs2815749	4	1	72814783	2.252e-18	305	G	RPL31P12	intergenic	12.04	NA
rs2821239	4	1	72590193	9.495e-12	120	A	NEGR1	intronic	0.885	NA
rs7531118	4	1	72837239	1.797e-13	32	C	RPL31P12	intergenic	11.35	4
rs7543826	4	1	73552990	7.397e-09	939	T	KRT8P21	intergenic	3.037	6
rs782239	4	1	72908137	9.106e-12	141	C	RPL31P12	intergenic	12.44	NA
rs61799470	5	1	93663043	4.609e-09	172	C	CCDC18	intronic	8.748	7
rs6697683	5	1	93634591	2.831e-11	404	G	TMED5	intronic	1.868	5
rs11101986	6	1	110247240	9.283e-09	90	A	GSTM2:GSTM1	intronic	0.909	5
rs13029479	7	2	655222	1.446e-08	110	A	TMEM18	intergenic	0.035	5
rs6717005	7	2	621910	6.641e-10	238	C	AC093326.3	intergenic	0.845	5
rs11693335	8	2	20370413	3.144e-09	71	A	RN7SL140P	intergenic	0.308	5
rs11693959	9	2	27574159	1.723e-12	60	C	GTF3C2	intronic	6.407	7
rs1659684	9	2	27384710	5.764e-10	17	T	AC013403.13	intergenic	3.476	NA
rs2178198	9	2	27895073	2.512e-13	77	T	SLC4A1AP	intronic	5.537	6
rs3792252	9	2	27995931	1.254e-14	390	A	MRPL33	intronic	6.479	4
rs4665963	9	2	27528692	8.674e-14	406	C	TRIM54	intronic	3.981	5
rs62131877	9	2	27740328	1.16e-08	135	T	GCKR	intronic	8.329	4
rs6744393	9	2	27750139	5.138e-21	84	T	GCKR	intergenic	3.633	4
rs6758814	9	2	28344863	3.958e-08	57	C	BRE	intronic	3.724	6
rs74446114	9	2	28066122	1.03e-15	60	C	MRPL33:RBKS	intronic	14.77	5
rs780095	9	2	27741105	4.352e-13	245	G	GCKR	intronic	0.544	NA
rs78484886	9	2	27637759	7.271e-09	28	G	PPM1G	intergenic	1.266	7
rs10168523	10	2	45192000	3.012e-19	20	G	AC012354.6	ncRNA_intronic	1.654	4
rs168096	10	2	45173845	6.376e-10	46	T	SIX3	downstream	5.246	NA
rs340515	10	2	45188370	9.872e-20	23	T	AC012354.6	ncRNA_exonic	3.835	NA
rs504675	10	2	45154689	9.848e-09	31	T	RP11-89K21.1	ncRNA_intronic	18.43	NA
rs55712520	10	2	45195789	5.19e-09	11	G	AC012354.6	ncRNA_exonic	2.371	6
rs138670924	11	2	169743221	1.559e-08	114	G	SPC25	intronic	0.005	6
rs34177044	11	2	169754485	2.95e-14	19	A	SPC25	intronic	0.274	6
rs567074	11	2	169794431	1.333e-08	85	T	ABCB11	intronic	2.824	7
rs60415045	11	2	169771124	7.515e-14	66	C	SPC25	intergenic	4.105	6
rs9825670	12	3	114743234	4.518e-11	214	A	ZBTB20	intronic	0.854	7
rs9831948	12	3	114971759	3.77e-08	240	C	RP11-190P13.2	ncRNA_intronic	5.029	5
rs11711127	13	3	117518996	1.676e-10	175	G	LSAMP:RP11-384F7.2	ncRNA_intronic	0.473	7
rs12489588	13	3	117475051	1.723e-08	73	T	LSAMP:RP11-384F7.2	ncRNA_intronic	1.813	7
rs16827974	13	3	117837222	6.044e-09	79	A	RP11-384F7.1	ncRNA_intronic	1.823	7
rs73185911	13	3	117804360	4.094e-08	55	G	RP11-384F7.1	ncRNA_intronic	2.506	4
rs28489907	14	3	136461544	6.173e-09	504	G	STAG1	intronic	2.084	6
rs4234589	15	3	185818882	2.291e-10	27	G	ETV5	intronic	3.093	6
rs3129317	16	4	3287655	1.639e-08	23	G	RGS12	intergenic	5.461	NA
rs111874202	17	4	100589126	1.613e-09	127	C	RP11-766F14.2	intergenic	0.383	6
rs6864091	18	5	75010002	1.754e-10	203	C	POC5	intronic	0.371	7
rs2447838	19	5	103927579	2.329e-08	309	T	RP11-6N13.1	ncRNA_intronic	3.189	7
rs12188278	20	5	166998222	6.018e-09	66	G	TENM2	intronic	3.073	5
rs9479500	21	6	153400305	4.205e-12	217	T	RGS17	intronic	0.777	7
rs13229610	22	7	44258964	1.456e-12	18	T	CAMK2B	UTR3	1.951	5
rs2300584	22	7	44219338	8.102e-10	17	G	GCK	intronic	2.287	NA
rs539022482	22	7	44267207	1.238e-15	8	A	CAMK2B	intronic	7.796	NA
rs55908146	22	7	44180226	9.213e-10	41	G	MYL7	UTR3	6.2	5
rs62459064	22	7	44216297	8.144e-12	42	T	GCK	intronic	0.185	5
rs730497	22	7	44223721	1.612e-20	24	A	GCK	intronic	3.8	NA
rs42129	23	7	72822848	9.554e-11	111	A	Y_RNA	intergenic	0.053	NA
rs71556729	23	7	72989516	1.927e-08	32	T	TBL2	intronic	0.205	6
rs531971155	24	7	80230898	4.646e-08	19	T	CD36	intronic	0.351	NA
rs75326924	24	7	80286003	1.437e-09	16	T	CD36	exonic	27	7
rs35246381	25	8	18272535	6.107e-10	81	T	NAT2	intergenic	0.882	5
rs10106652	26	8	19928160	9.626e-34	30	A	AC100802.3	intergenic	2.05	5
rs118099376	26	8	19905960	6.429e-11	5	A	AC100802.3	intergenic	0.046	7
rs1441760	26	8	19864749	2.157e-59	249	T	LPL	intergenic	2.479	NA
rs1441771	26	8	19757300	6.385e-16	36	T	LPL	intergenic	3.36	NA
rs188385627	26	8	19791860	2.528e-11	5	T	LPL	intronic	5.058	6
rs2119693	26	8	19720395	4.363e-08	39	T	INTS10	intergenic	0.907	NA
rs249	26	8	19811006	6.539e-30	3	C	LPL	intronic	2.285	7
rs308	26	8	19817476	2.678e-42	86	G	LPL	intronic	0.896	6
rs4464984	26	8	19838469	5.522e-57	237	T	LPL	intergenic	0.14	7
rs7012658	26	8	19875724	5.081e-09	162	T	LPL	intergenic	1.464	6
rs7012719	26	8	19735616	2.985e-09	8	C	LPL	intergenic	0.061	5
rs73208819	26	8	19883924	4.006e-08	6	C	AC100802.3	intergenic	2.598	7
rs74304285	26	8	19808030	9.448e-28	41	A	LPL	intronic	2.401	7
rs75218485	26	8	19777695	3.855e-09	10	T	LPL	intronic	0.776	7
rs78358410	26	8	19889399	9.137e-45	104	G	AC100802.3	intergenic	0.106	6
rs4738080	27	8	71129813	1.668e-08	227	G	NCOA2	intronic	5.742	3a
rs2009382	28	8	116633906	1.751e-15	117	T	TRPS1	intronic	0.12	6
rs2245019	28	8	116622906	1.362e-15	180	A	TRPS1	intronic	1.665	6
rs3808413	28	8	116466427	2.898e-09	15	C	TRPS1	intronic	2.679	7
rs3802177	29	8	118185025	2.131e-09	29	A	SLC30A8	UTR3	3.933	NA
rs2385114	30	8	126447308	2.604e-09	17	T	TRIB1	intronic	2.393	4
rs11788917	31	9	11202702	7.14e-10	274	T	RP11-23D5.1	intergenic	0.95	7
rs2171661	31	9	11308992	2.177e-09	429	T	RP11-23D5.1	intergenic	1.824	NA
rs148124442	32	9	97109966	1.83e-09	204	G	RP11-307E17.8	ncRNA_intronic	0.572	5
rs12552509	33	9	107508879	8.039e-09	33	G	NIPSNAP3A	intergenic	9.606	6
rs13291032	33	9	107630620	2.927e-13	17	T	ABCA1	intronic	0.018	5
rs150064281	33	9	107637688	1.287e-12	3	G	ABCA1	intronic	0.349	5
rs150237889	33	9	107593620	9.785e-11	18	C	ABCA1	intronic	4.603	6
rs2066716	33	9	107568705	1.457e-14	8	T	ABCA1	exonic	0.793	NA
rs2740480	33	9	107562557	2.242e-14	66	A	ABCA1	intronic	12.85	NA
rs2740487	33	9	107664961	1.717e-08	38	G	ABCA1	intronic	9.319	NA
rs2740488	33	9	107661742	1.076e-55	46	C	ABCA1	intronic	1.965	NA
rs2740492	33	9	107658248	5.19e-17	68	T	ABCA1	intronic	1.228	NA
rs4149307	33	9	107589744	1.88e-29	40	T	ABCA1	intronic	1.49	NA
rs7043581	33	9	107649984	2.884e-12	45	G	ABCA1	intronic	2.755	6
rs73664375	33	9	107664373	1.463e-09	22	T	ABCA1	intronic	3.523	5
rs61867194	34	10	106764868	5e-09	236	C	SORCS3	intronic	1.295	7
rs10787429	35	10	113949664	2.555e-09	58	C	GPAM	intergenic	1.637	7
rs117421856	35	10	113988434	2.588e-10	6	A	GPAM	intergenic	0.153	7
rs200749392	35	10	114014099	1.212e-08	93	C	TECTB	intergenic	1.165	6
rs60191209	35	10	113988995	4.08e-09	37	C	GPAM	intergenic	1.582	4
rs11030099	36	11	27677583	3.757e-08	76	A	BDNF-AS:BDNF	ncRNA_intronic	12.4	7
rs12787646	37	11	47669665	1.275e-08	305	C	MTCH2	intergenic	2.528	5
rs641325	38	11	57681828	1.196e-08	69	G	OR5AZ1P	intergenic	3.921	NA
rs174547	39	11	61570783	2.255e-09	95	C	FADS2:FADS1	intronic	5.176	1d
rs10896022	40	11	65366610	3.828e-09	41	A	MAP3K11	intronic	2.099	2b
rs695110	41	11	75456581	5.83e-09	267	C	RN7SL786P	intergenic	1.015	NA
rs6483414	42	11	88477214	9.257e-09	257	C	GRM5	intronic	8.485	7
rs7939942	42	11	88584166	3.835e-08	202	C	GRM5	intronic	0.212	5
rs11020133	43	11	92724320	1.045e-08	35	A	MTNR1B	intergenic	9.698	4
rs4331050	43	11	92696014	4.119e-15	57	T	RP11-676F20.1	intergenic	1.129	6
rs10892001	44	11	116505440	1.172e-10	12	A	AP000770.1	intergenic	0.111	6
rs10892023	44	11	116598248	7.454e-26	75	C	BUD13	intergenic	2.224	5
rs111255936	44	11	116710993	1.5e-17	88	T	APOA1-AS	ncRNA_intronic	3.132	4
rs11216118	44	11	116596395	4.352e-19	17	T	BUD13	intergenic	1.253	5
rs11216162	44	11	116728277	5.496e-10	243	A	SIK3	intronic	2.043	4
rs11604424	44	11	116651115	8.77e-15	35	T	ZNF259	intronic	11.92	5
rs116987336	44	11	117175658	1.378e-13	12	A	BACE1	intronic	3.069	5
rs117091722	44	11	116927600	9.48e-10	9	A	SIK3	intronic	1.428	7
rs11820504	44	11	116529442	1.046e-14	37	C	AP000770.1	downstream	3.229	5
rs1261672	44	11	116518960	7.456e-11	28	G	AP000770.1	ncRNA_intronic	0.93	5
rs1263056	44	11	116576415	2.27e-21	73	G	BUD13	intergenic	8.457	NA
rs138869088	44	11	117217171	2.167e-09	13	T	CEP164	intronic	2.231	7
rs139524394	44	11	116624922	1.058e-10	11	T	BUD13	intronic	1.778	7
rs141351422	44	11	116929062	1.909e-09	20	T	SIK3	intronic	7.519	7
rs145914258	44	11	117027183	2.769e-11	14	A	PAFAH1B2	intronic	2.306	5
rs151007118	44	11	116583864	1.661e-17	2	T	BUD13	intergenic	1.131	7
rs151139277	44	11	116753093	2.166e-09	41	T	SIK3	intronic	5.958	5
rs17440824	44	11	116634173	1.678e-11	104	T	BUD13	intronic	1.419	7
rs180326	44	11	116624703	7.839e-36	55	T	BUD13	intronic	0.029	NA
rs180360	44	11	116598988	2.666e-31	54	G	BUD13	intergenic	0.882	NA
rs185070451	44	11	117030394	2.844e-10	6	G	PAFAH1B2	intronic	3.203	6
rs185672288	44	11	116988389	1.222e-13	9	A	AP000936.5	downstream	0.127	7
rs190231637	44	11	116859263	4.04e-09	11	A	SIK3	intronic	0.277	6
rs193076783	44	11	116873273	3.843e-08	5	G	SIK3	intronic	7.469	5
rs201535154	44	11	116506784	3.762e-08	7	T	AP000770.1	intergenic	4.424	5
rs236916	44	11	117089628	9.58e-14	149	A	PCSK7	intronic	10.87	5
rs3016352	44	11	116521748	2.054e-09	31	A	AP000770.1	ncRNA_intronic	2.29	7
rs3741297	44	11	116657667	9.81e-122	8	T	ZNF259	intronic	3.652	NA
rs4938362	44	11	117100029	3.385e-08	182	A	PCSK7	intronic	5.959	5
rs567312	44	11	116730738	6.573e-30	323	A	SIK3	intronic	0.364	6
rs61905078	44	11	116596309	1.325e-17	66	C	BUD13	intergenic	3.713	5
rs61905084	44	11	116610294	1.593e-60	45	C	BUD13	intergenic	0.391	5
rs623908	44	11	116640368	7.689e-51	45	G	BUD13	intronic	6.405	7
rs651821	44	11	116662579	8.45e-131	29	T	APOA5	UTR5	8.227	1f
rs7101528	44	11	116698665	3.848e-11	264	A	APOC3	intergenic	0.854	5
rs74328581	44	11	116918046	4.093e-16	109	A	SIK3	intronic	11	6
rs75310100	44	11	116578361	4.578e-12	7	T	BUD13	intergenic	0.593	4
rs79538491	44	11	116681919	8.823e-13	7	G	AP006216.5	intergenic	5.782	2b
rs80220270	44	11	116680961	1.114e-10	112	C	AP006216.5	intergenic	3.592	5
rs9804646	44	11	116665079	1.052e-41	19	T	APOA5	intergenic	2.336	7
rs11065836	45	12	111671076	1.428e-14	61	A	CUX2	intronic	0.054	5
rs11066015	45	12	112168009	1.736e-29	463	A	ACAD10	intronic	1.509	5
rs117121174	45	12	110697330	8.329e-10	59	A	ATP2A2	intergenic	1.897	5
rs11832104	45	12	111619440	4.375e-08	83	C	CUX2	intronic	16.43	1f
rs12828640	45	12	111361298	2.963e-09	109	G	MYL2	intergenic	14.65	5
rs2040571	45	12	111357727	4.96e-14	82	A	MYL2	intronic	15.95	NA
rs2078847	45	12	111352478	5.17e-12	92	G	MYL2	intronic	0.606	NA
rs3858704	45	12	111705893	2.877e-19	224	G	CUX2	intronic	4.094	7
rs4766638	45	12	110298858	9.011e-09	107	C	GLTP	intronic	0.434	4
rs7313797	45	12	109896165	7.059e-12	183	C	KCTD10	UTR5	6.242	1b
rs10773112	46	12	125338529	2.315e-10	5	T	SCARB1	intronic	2.115	4
rs12424178	46	12	125265974	1.515e-10	63	A	SCARB1	intronic	0.039	5
rs1727307	46	12	123575742	1.112e-08	174	G	PITPNM2	intronic	0.692	6
rs201750024	46	12	125352493	6.328e-13	35	A	SCARB1	intergenic	1.841	4
rs7315453	46	12	123825389	1.504e-11	462	C	SBNO1	intronic	4.945	5
rs73231950	46	12	123782039	8.878e-12	457	A	SBNO1	intronic	0.438	5
rs921919	46	12	125265201	1.995e-14	34	A	SCARB1	intronic	4.426	2b
rs3742899	47	14	69695792	3.038e-08	157	A	EXD2	intronic	9.414	6
rs3803300	48	14	105269779	1.23e-10	48	C	ZBTB42	UTR3	6.271	NA
rs10162642	49	15	58577163	6.15e-13	38	A	ALDH1A2	intronic	2.449	7
rs10518972	49	15	58650355	5.359e-09	28	T	ALDH1A2	intronic	15.23	2c
rs11071383	49	15	58744970	2.514e-09	1	C	ALDH1A2:LIPC:RP11-355N15.1	ncRNA_intronic	1.862	7
rs118146059	49	15	58544773	6.897e-12	3	C	ALDH1A2	intronic	2.778	7
rs12185071	49	15	58683227	2.012e-22	53	T	ALDH1A2	intronic	4.264	7
rs12593645	49	15	58714417	2.751e-24	15	A	ALDH1A2:LIPC	intronic	3.493	7
rs12594125	49	15	58720403	2.393e-12	2	A	ALDH1A2:LIPC	intronic	0.442	5
rs12910051	49	15	58580525	1.082e-11	58	G	ALDH1A2	intronic	1.749	7
rs13329672	49	15	58699937	5.858e-17	24	T	ALDH1A2	intronic	0.805	5
rs1601935	49	15	58671765	1.692e-35	10	T	ALDH1A2	intronic	1.247	6
rs16940147	49	15	58676119	4.386e-12	19	A	ALDH1A2	intronic	10.36	2b
rs2070895	49	15	58723939	2.356e-78	32	A	ALDH1A2:LIPC	intronic	7.431	2b
rs261291	49	15	58680178	1.474e-64	35	C	ALDH1A2	intronic	2.171	NA
rs261303	49	15	58667377	5.691e-11	4	G	ALDH1A2	intronic	2.636	6
rs261338	49	15	58735005	3.356e-15	9	G	ALDH1A2:LIPC:RP11-355N15.1	ncRNA_intronic	6.807	NA
rs35128881	49	15	58692148	5.826e-21	39	T	ALDH1A2	intronic	1.694	4
rs402465	49	15	58705029	2.518e-20	12	T	ALDH1A2:LIPC	intronic	4.465	NA
rs515081	49	15	58716257	5.892e-21	3	G	ALDH1A2:LIPC	intronic	5.731	NA
rs56903760	49	15	58692681	1.425e-46	34	T	ALDH1A2	intronic	3.872	7
rs62000869	49	15	58706911	8.389e-09	24	G	ALDH1A2:LIPC	intronic	13.62	5
rs62001733	49	15	58662090	5.22e-19	22	C	ALDH1A2	intronic	4.141	5
rs7163280	49	15	58718340	1.181e-10	5	T	ALDH1A2:LIPC	intronic	2.159	7
rs7165301	49	15	58552606	2.823e-12	32	C	ALDH1A2	intronic	2.729	2b
rs723967	49	15	58696300	3.295e-17	32	C	ALDH1A2	intronic	4.95	4
rs74018729	49	15	58641140	8.494e-14	4	A	ALDH1A2	intronic	0.222	7
rs75429347	49	15	58736611	1.046e-15	10	G	ALDH1A2:LIPC:RP11-355N15.1	ncRNA_intronic	1.36	4
rs8041059	49	15	58743709	6.543e-13	22	T	ALDH1A2:LIPC:RP11-355N15.1	ncRNA_intronic	1.465	5
rs8042092	49	15	58664942	4.314e-13	48	A	ALDH1A2	intronic	1.202	5
rs8043310	49	15	58731818	1.15e-40	25	A	ALDH1A2:LIPC:RP11-355N15.1	ncRNA_intronic	0.44	7
rs8192701	49	15	58724371	4.135e-09	19	T	ALDH1A2:LIPC	intronic	13.31	5
rs56094641	50	16	53806453	8.838e-18	111	G	FTO	intronic	1.247	6
rs8057044	50	16	53812614	6.347e-10	109	A	FTO	intronic	0.148	7
rs1039331	51	16	56598254	6.918e-09	20	A	MT4	upstream	0.576	7
rs11076174	51	16	57003146	2.732e-62	19	C	CETP	intronic	0.918	6
rs1122390	51	16	56986045	1.075e-21	14	T	AC012181.1	intergenic	0.411	6
rs117011262	51	16	57071546	1.978e-09	4	G	NLRC5	intronic	4.721	5
rs117678160	51	16	56889271	1.178e-24	11	T	MIR138-2	intergenic	0.098	5
rs118089749	51	16	57001794	2.36e-25	1	A	CETP	intronic	0.16	4
rs118099751	51	16	56742780	2.982e-08	33	T	RP11-343H19.1	ncRNA_exonic	0.818	2b
rs118146573	51	16	57000938	2.872e-15	19	A	CETP	intronic	3.475	5
rs12597250	51	16	57005620	6.339e-16	31	C	CETP	intronic	1.889	5
rs12708980	51	16	57012379	9.697e-66	18	G	CETP	intronic	3.726	6
rs12720898	51	16	57011243	3.767e-09	6	T	CETP	intronic	1.131	4
rs139882624	51	16	56994922	6.452e-13	6	A	CETP	upstream	4.199	4
rs148808285	51	16	56991645	4.709e-10	5	T	AC012181.1	downstream	2.465	6
rs149745393	51	16	57025418	1.351e-19	8	T	NLRC5	intronic	0.149	6
rs17231506	51	16	56994528	4e-229	32	T	CETP	intergenic	0.673	5
rs1865834	51	16	56911640	1.11e-11	1	G	SLC12A3	intronic	0.063	NA
rs2289113	51	16	56947275	2.677e-09	11	T	SLC12A3	exonic	16.84	NA
rs2303790	51	16	57017292	4.56e-127	4	G	CETP	exonic	23.5	4
rs289708	51	16	57038162	9.347e-13	16	G	NLRC5	intronic	5.013	5
rs289736	51	16	57031210	8.163e-10	7	C	NLRC5	intronic	1.519	NA
rs289741	51	16	57017474	3.174e-26	25	A	CETP	intronic	6.79	4
rs34433002	51	16	56932531	2.842e-09	43	A	SLC12A3	intronic	0.196	7
rs34602471	51	16	57000242	4.952e-22	7	G	CETP	intronic	0.423	5
rs36229787	51	16	56993897	5.238e-43	12	C	CETP	intergenic	2.683	NA
rs367772463	51	16	56632196	1.787e-15	6	C	MT3	intergenic	6.558	5
rs3764259	51	16	57216877	1.02e-09	2	C	FAM192A	intronic	2.713	NA
rs550450825	51	16	56924744	2.901e-10	8	A	SLC12A3	intronic	1.758	NA
rs551794976	51	16	56912379	2.522e-17	2	C	SLC12A3	intronic	0.396	NA
rs561673570	51	16	56502633	9.577e-12	9	A	OGFOD1:BBS2	intronic	0.444	NA
rs572564758	51	16	56991610	5.173e-15	3	C	AC012181.1	downstream	1.279	NA
rs58476720	51	16	57021203	4.065e-09	8	A	NLRC5	intergenic	0.009	7
rs58514889	51	16	56781735	3.172e-08	8	A	NUP93	intronic	2.815	5
rs59515242	51	16	56945049	2.189e-16	23	A	SLC12A3	intronic	0.821	2b
rs62035923	51	16	56898198	3.396e-11	73	G	SLC12A3	upstream	0.468	6
rs62035949	51	16	56911676	3.983e-12	16	T	SLC12A3	intronic	0.137	5
rs7185879	51	16	56428008	3.354e-10	141	T	AMFR	intronic	7.346	7
rs7203984	51	16	56999258	1.722e-85	25	C	CETP	intronic	0.458	2b
rs7204044	51	16	56942709	6.547e-31	16	G	SLC12A3	intronic	3.595	4
rs73561767	51	16	56985837	1.654e-09	6	G	AC012181.1	intergenic	0.481	5
rs75148450	51	16	56986803	4.274e-11	1	C	AC012181.1	intergenic	2.768	5
rs75429044	51	16	56960147	1.946e-08	35	A	HERPUD1	intergenic	0.05	7
rs77045534	51	16	56897990	7.863e-27	92	G	SLC12A3	intergenic	11.26	6
rs77712507	51	16	56742475	3.171e-08	57	A	RP11-343H19.1	downstream	2.192	4
rs8053985	51	16	56735317	4.238e-09	9	T	RP11-343H19.1	intergenic	1.44	7
rs8055054	51	16	56911038	1.814e-18	27	C	SLC12A3	intronic	1.851	7
rs8059431	51	16	57028451	8.678e-19	14	T	NLRC5	intronic	0.307	3a
rs820299	51	16	57000284	7.614e-11	31	A	CETP	intronic	1.992	NA
rs9924087	51	16	57002242	3.47e-21	10	T	CETP	intronic	0.239	7
rs9925265	51	16	56950210	3.111e-17	73	A	SLC12A3	downstream	0.664	4
rs9938160	51	16	56984590	2.824e-08	8	C	AC012181.1	intergenic	2.673	5
rs9989419	51	16	56985139	7.265e-12	4	G	AC012181.1	intergenic	2.148	1b
rs200054031	52	16	68017354	2.597e-10	404	G	DPEP3	intergenic	4.521	5
rs55974400	52	16	68317498	1.112e-11	283	A	SLC7A6	intronic	5.125	3a
rs8047343	52	16	68143745	1.837e-09	645	A	RP11-67A1.2:NFATC3	ncRNA_intronic	0.766	7
rs116100746	53	16	81554152	2.844e-08	37	C	CMIP	intronic	2.481	6
rs2966090	53	16	81529419	2.854e-08	39	C	CMIP	intronic	5.386	4
rs34506659	53	16	81505584	1.956e-10	38	G	CMIP	intronic	1.288	2b
rs55931203	54	17	65854602	7.139e-09	443	T	BPTF	intronic	2.406	5
rs11082764	55	18	47119579	3.386e-39	30	G	LIPG	downstream	1.025	7
rs11082769	55	18	47153899	6.149e-19	15	G	SMUG1P1	intergenic	0.556	6
rs1943973	55	18	47179516	1.293e-16	22	A	SMUG1P1	intergenic	0.411	NA
rs2000813	55	18	47093864	1.55e-11	24	T	LIPG	exonic	10.03	7
rs28405356	55	18	47122921	8.025e-11	21	A	LIPG	intergenic	1.368	6
rs28778033	55	18	47214864	4.044e-08	77	A	SMUG1P1	intergenic	2.461	3a
rs35959939	55	18	47112944	2.944e-08	33	T	LIPG	intronic	11.44	5
rs4939883	55	18	47167214	1.498e-16	30	C	SMUG1P1	intergenic	4.144	5
rs7228085	55	18	47160814	4.519e-10	44	G	SMUG1P1	intergenic	0.222	6
rs7229377	55	18	47148299	9.92e-10	30	T	SMUG1P1	intergenic	5.166	3a
rs72642487	55	18	47114770	7.996e-17	50	G	LIPG	intronic	1.898	6
rs72642490	55	18	47207680	9.058e-09	86	T	SMUG1P1	intergenic	15.16	6
rs73959582	55	18	47148886	1.099e-08	36	C	SMUG1P1	intergenic	2.166	5
rs73959590	55	18	47156188	5.548e-24	18	A	SMUG1P1	intergenic	1.494	7
rs8090363	55	18	47133828	2.465e-13	26	G	LIPG	intergenic	2.17	7
rs6567160	56	18	57829135	8.901e-15	204	C	RP11-795H16.3	downstream	14.56	6
rs670593	56	18	57869190	8.789e-09	207	A	RP11-795H16.2	intergenic	0.647	7
rs75649442	56	18	57869099	1.626e-08	8	T	RP11-795H16.2	intergenic	0.47	7
rs34945223	57	18	77575871	1.182e-09	44	G	RP11-154H12.3	ncRNA_intronic	0.177	5
rs10411534	58	19	11355298	1.004e-08	66	A	DOCK6	intronic	1.367	7
rs1654404	58	19	11384359	6.493e-14	43	C	DOCK6	intergenic	1.859	NA
rs201019550	58	19	11334894	4.177e-23	44	C	DOCK6	intronic	3.042	6
rs4804579	58	19	11358700	4.168e-14	117	C	DOCK6	intronic	5.377	5
rs8101206	58	19	11310836	1.865e-12	56	A	DOCK6	intronic	0.066	5
rs12979148	59	19	19406869	3.923e-12	201	C	SUGP1	intronic	6.083	6
rs144787624	59	19	19470599	7.321e-09	13	T	MAU2	intergenic	0.057	7
rs17699261	59	19	19819843	1.715e-08	15	G	CTC-412M14.5	ncRNA_exonic	9.168	5
rs2285626	59	19	19467545	8.106e-14	204	T	MAU2	UTR3	0.189	5
rs55823486	59	19	19544644	1.694e-17	21	T	GATAD2A	intronic	9.027	5
rs58434384	59	19	19786099	3.973e-22	12	G	ZNF101	intronic	2.815	7
rs7249692	59	19	19670688	1.65e-11	149	C	PBX4	intergenic	0.316	7
rs1065853	60	19	45413233	5.041e-15	13	T	APOE	downstream	0.005	2b
rs112784534	60	19	45444566	1.462e-11	142	T	APOC4-APOC2:APOC4	upstream	1.345	7
rs12972970	60	19	45387596	1.141e-11	18	A	PVRL2:CTB-129P6.4	ncRNA_intronic	2.278	7
rs34224078	60	19	45383115	1.855e-08	10	G	PVRL2	intronic	3.141	4
rs429358	60	19	45411941	6.916e-19	35	C	APOE	exonic	12.64	5
rs12986064	61	19	54755133	7.231e-12	19	C	LILRB5	intronic	1.997	5
rs427366	61	19	54795299	4.048e-08	33	C	AC010518.3	intergenic	0.008	5
rs431420	61	19	54792079	9.697e-13	84	T	AC010518.3	intergenic	0.02	5
rs435306	62	20	44538484	1.049e-14	42	T	PLTP	intronic	1.67	6
rs6065904	62	20	44534651	4.239e-10	16	A	PLTP	intronic	3.336	4
rs6130976	62	20	44579572	9.988e-10	36	T	ZNF335	intronic	0.362	5
rs131654	63	22	21917190	4.626e-17	36	T	UBE2L3	intronic	3.619	7
rs464161	63	22	21815928	6.543e-09	123	T	TMEM191C	intergenic	8.808	7
rs5754422	63	22	21980257	8.348e-21	155	G	UBE2L3	intergenic	11.04	2b

## Sheet: S6
SNV	GenomicLocus	chr	pos	MAMT.P	Novel	cumSum	HetPVal
rs3768320	1	1	40032239	2.374e-11	0	1	1
rs3820615	1	1	40097518	3.976e-09	0	1	1
rs58302493	1	1	40033905	1.958e-11	0	1	1
rs12749263	2	1	63028198	6.963e-09	1	1	0.1576
rs2182869	2	1	63194650	2.369e-19	1	1	0.4688
rs56115463	2	1	63005751	1.051e-12	1	1	0.2667
rs58583743	2	1	63265523	3.505e-11	1	1	0.7687
rs6661669	2	1	63185969	4.803e-25	1	1	0.001316
rs1392816	3	1	66481188	3.977e-08	0	1	0.1908
rs6588183	3	1	66524258	1.138e-08	0	1	0.2679
rs12137231	4	1	72735458	7.836e-09	0	1	0.106
rs12748679	4	1	72644585	4.395e-15	0	1	0.5676
rs2815749	4	1	72814783	2.252e-18	0	1	0.7794
rs2821239	4	1	72590193	9.495e-12	0	1	0.1965
rs7531118	4	1	72837239	1.797e-13	0	1	0.0001382
rs7543826	4	1	73552990	7.397e-09	0	1	0.3304
rs782239	4	1	72908137	9.106e-12	0	1	0.2831
rs61799470	5	1	93663043	4.609e-09	0	1	1
rs6697683	5	1	93634591	2.831e-11	0	1	1
rs11101986	6	1	110247240	9.283e-09	0	1	1
rs13029479	7	2	655222	1.446e-08	1	1	1
rs6717005	7	2	621910	6.641e-10	1	1	1
rs11693335	8	2	20370413	3.144e-09	0	1	0.5644
rs11693959	9	2	27574159	1.723e-12	0	1	1
rs1659684	9	2	27384710	5.764e-10	0	1	0.9342
rs2178198	9	2	27895073	2.512e-13	0	1	1
rs3792252	9	2	27995931	1.254e-14	0	1	0.4591
rs4665963	9	2	27528692	8.674e-14	0	1	0.5237
rs62131877	9	2	27740328	1.16e-08	0	1	1
rs6744393	9	2	27750139	5.138e-21	0	1	0.1997
rs6758814	9	2	28344863	3.958e-08	0	1	0.09932
rs74446114	9	2	28066122	1.03e-15	0	1	0.4396
rs780095	9	2	27741105	4.352e-13	0	1	1
rs78484886	9	2	27637759	7.271e-09	0	1	1
rs10168523	10	2	45192000	3.012e-19	0	1	1
rs168096	10	2	45173845	6.376e-10	0	1	1
rs340515	10	2	45188370	9.872e-20	0	1	1
rs504675	10	2	45154689	9.848e-09	0	1	1
rs55712520	10	2	45195789	5.19e-09	0	1	1
rs138670924	11	2	169743221	1.559e-08	1	1	1
rs34177044	11	2	169754485	2.95e-14	1	1	1
rs567074	11	2	169794431	1.333e-08	1	1	1
rs60415045	11	2	169771124	7.515e-14	1	1	1
rs9825670	12	3	114743234	4.518e-11	0	1	1
rs9831948	12	3	114971759	3.77e-08	0	1	1
rs11711127	13	3	117518996	1.676e-10	0	1	0.6127
rs12489588	13	3	117475051	1.723e-08	0	1	0.06589
rs16827974	13	3	117837222	6.044e-09	0	1	0.5518
rs73185911	13	3	117804360	4.094e-08	0	1	1
rs28489907	14	3	136461544	6.173e-09	0	1	1
rs4234589	15	3	185818882	2.291e-10	0	1	0.1709
rs3129317	16	4	3287655	1.639e-08	0	1	0.498
rs111874202	17	4	100589126	1.613e-09	0	1	1
rs6864091	18	5	75010002	1.754e-10	1	1	1
rs2447838	19	5	103927579	2.329e-08	0	1	7.618e-05
rs12188278	20	5	166998222	6.018e-09	0	1	0.6522
rs9479500	21	6	153400305	4.205e-12	0	1	1
rs13229610	22	7	44258964	1.456e-12	0	1	1
rs2300584	22	7	44219338	8.102e-10	0	1	1
rs539022482	22	7	44267207	1.238e-15	0	1	1
rs55908146	22	7	44180226	9.213e-10	0	1	1
rs62459064	22	7	44216297	8.144e-12	0	1	1
rs730497	22	7	44223721	1.612e-20	0	1	1
rs42129	23	7	72822848	9.554e-11	1	1	1.276e-07
rs71556729	23	7	72989516	1.927e-08	1	1	1
rs531971155	24	7	80230898	4.646e-08	0	1	1
rs75326924	24	7	80286003	1.437e-09	0	1	1
rs35246381	25	8	18272535	6.107e-10	0	1	0.000184
rs10106652	26	8	19928160	9.626e-34	0	1	1
rs118099376	26	8	19905960	6.429e-11	0	1	1
rs1441760	26	8	19864749	2.157e-59	0	1	1
rs1441771	26	8	19757300	6.385e-16	0	1	1
rs188385627	26	8	19791860	2.528e-11	0	1	1
rs2119693	26	8	19720395	4.363e-08	0	1	1.324e-07
rs249	26	8	19811006	6.539e-30	0	1	1
rs308	26	8	19817476	2.678e-42	0	1	1
rs4464984	26	8	19838469	5.522e-57	0	1	1
rs7012658	26	8	19875724	5.081e-09	0	1	1
rs7012719	26	8	19735616	2.985e-09	0	1	1
rs73208819	26	8	19883924	4.006e-08	0	1	1
rs74304285	26	8	19808030	9.448e-28	0	1	1
rs75218485	26	8	19777695	3.855e-09	0	1	1
rs78358410	26	8	19889399	9.137e-45	0	1	1
rs4738080	27	8	71129813	1.668e-08	0	1	1
rs2009382	28	8	116633906	1.751e-15	0	1	1
rs2245019	28	8	116622906	1.362e-15	0	1	1
rs3808413	28	8	116466427	2.898e-09	0	1	1
rs3802177	29	8	118185025	2.131e-09	0	1	1
rs2385114	30	8	126447308	2.604e-09	1	1	0.001832
rs11788917	31	9	11202702	7.14e-10	0	1	1
rs2171661	31	9	11308992	2.177e-09	0	1	1
rs148124442	32	9	97109966	1.83e-09	0	1	1
rs12552509	33	9	107508879	8.039e-09	1	1	1
rs13291032	33	9	107630620	2.927e-13	1	1	1
rs150064281	33	9	107637688	1.287e-12	1	1	1
rs150237889	33	9	107593620	9.785e-11	1	1	1
rs2066716	33	9	107568705	1.457e-14	1	1	1
rs2740480	33	9	107562557	2.242e-14	1	1	1
rs2740487	33	9	107664961	1.717e-08	1	1	1
rs2740488	33	9	107661742	1.076e-55	1	1	1
rs2740492	33	9	107658248	5.19e-17	1	1	1
rs4149307	33	9	107589744	1.88e-29	1	1	1
rs7043581	33	9	107649984	2.884e-12	1	1	1
rs73664375	33	9	107664373	1.463e-09	1	1	9.06e-07
rs61867194	34	10	106764868	5e-09	0	1	1
rs10787429	35	10	113949664	2.555e-09	0	1	1
rs117421856	35	10	113988434	2.588e-10	0	1	1
rs200749392	35	10	114014099	1.212e-08	0	1	1
rs60191209	35	10	113988995	4.08e-09	0	1	1
rs11030099	36	11	27677583	3.757e-08	0	1	1
rs12787646	37	11	47669665	1.275e-08	0	1	1
rs641325	38	11	57681828	1.196e-08	0	1	0.3749
rs174547	39	11	61570783	2.255e-09	0	1	0.4434
rs10896022	40	11	65366610	3.828e-09	0	1	1
rs695110	41	11	75456581	5.83e-09	0	1	1
rs6483414	42	11	88477214	9.257e-09	0	1	0.02943
rs7939942	42	11	88584166	3.835e-08	0	1	0.6611
rs11020133	43	11	92724320	1.045e-08	1	1	1
rs4331050	43	11	92696014	4.119e-15	1	1	1
rs10892001	44	11	116505440	1.172e-10	1	1	1
rs10892023	44	11	116598248	7.454e-26	1	1	1
rs111255936	44	11	116710993	1.5e-17	1	1	0.9582
rs11216118	44	11	116596395	4.352e-19	1	1	8.781e-33
rs11216162	44	11	116728277	5.496e-10	1	1	0.4252
rs11604424	44	11	116651115	8.77e-15	1	1	1
rs116987336	44	11	117175658	1.378e-13	1	1	1
rs117091722	44	11	116927600	9.48e-10	1	1	1
rs11820504	44	11	116529442	1.046e-14	1	1	1
rs1261672	44	11	116518960	7.456e-11	1	1	1
rs1263056	44	11	116576415	2.27e-21	1	1	1
rs138869088	44	11	117217171	2.167e-09	1	1	1
rs139524394	44	11	116624922	1.058e-10	1	1	1
rs141351422	44	11	116929062	1.909e-09	1	1	1
rs145914258	44	11	117027183	2.769e-11	1	1	1
rs151007118	44	11	116583864	1.661e-17	1	1	1
rs151139277	44	11	116753093	2.166e-09	1	1	1
rs17440824	44	11	116634173	1.678e-11	1	1	1
rs180326	44	11	116624703	7.839e-36	1	1	1
rs180360	44	11	116598988	2.666e-31	1	1	1
rs185070451	44	11	117030394	2.844e-10	1	1	1
rs185672288	44	11	116988389	1.222e-13	1	1	1
rs190231637	44	11	116859263	4.04e-09	1	1	1
rs193076783	44	11	116873273	3.843e-08	1	1	1
rs201535154	44	11	116506784	3.762e-08	1	1	1
rs236916	44	11	117089628	9.58e-14	1	1	0.4252
rs3016352	44	11	116521748	2.054e-09	1	1	1
rs3741297	44	11	116657667	9.81e-122	1	1	7.901e-08
rs4938362	44	11	117100029	3.385e-08	1	1	0.01148
rs567312	44	11	116730738	6.573e-30	1	1	0.005953
rs61905078	44	11	116596309	1.325e-17	1	1	1
rs61905084	44	11	116610294	1.593e-60	1	1	1
rs623908	44	11	116640368	7.689e-51	1	1	1
rs651821	44	11	116662579	8.45e-131	1	1	1
rs7101528	44	11	116698665	3.848e-11	1	1	1
rs74328581	44	11	116918046	4.093e-16	1	1	1
rs75310100	44	11	116578361	4.578e-12	1	1	1
rs79538491	44	11	116681919	8.823e-13	1	1	0.07855
rs80220270	44	11	116680961	1.114e-10	1	1	1
rs9804646	44	11	116665079	1.052e-41	1	1	1
rs11065836	45	12	111671076	1.428e-14	0	1	1
rs11066015	45	12	112168009	1.736e-29	0	1	1
rs117121174	45	12	110697330	8.329e-10	0	1	1
rs11832104	45	12	111619440	4.375e-08	0	1	1
rs12828640	45	12	111361298	2.963e-09	0	1	1
rs2040571	45	12	111357727	4.96e-14	0	1	1
rs2078847	45	12	111352478	5.17e-12	0	1	1
rs3858704	45	12	111705893	2.877e-19	0	1	1
rs4766638	45	12	110298858	9.011e-09	0	1	0.2532
rs7313797	45	12	109896165	7.059e-12	0	1	0.5725
rs10773112	46	12	125338529	2.315e-10	1	1	1
rs12424178	46	12	125265974	1.515e-10	1	1	0.2296
rs201750024	46	12	125352493	6.328e-13	1	1	1
rs921919	46	12	125265201	1.995e-14	1	1	1
rs1727307	46	12	123575742	1.112e-08	0	1	1
rs7315453	46	12	123825389	1.504e-11	0	1	0.0005723
rs73231950	46	12	123782039	8.878e-12	0	1	1
rs3742899	47	14	69695792	3.038e-08	0	1	0.8761
rs3803300	48	14	105269779	1.23e-10	1	1	1
rs10162642	49	15	58577163	6.15e-13	0	1	1
rs10518972	49	15	58650355	5.359e-09	0	1	1
rs11071383	49	15	58744970	2.514e-09	0	1	1
rs118146059	49	15	58544773	6.897e-12	0	1	1
rs12185071	49	15	58683227	2.012e-22	0	1	1
rs12593645	49	15	58714417	2.751e-24	0	1	1
rs12594125	49	15	58720403	2.393e-12	0	1	0.9586
rs12910051	49	15	58580525	1.082e-11	0	1	1
rs13329672	49	15	58699937	5.858e-17	0	1	1
rs1601935	49	15	58671765	1.692e-35	0	1	1
rs16940147	49	15	58676119	4.386e-12	0	1	1
rs2070895	49	15	58723939	2.356e-78	0	1	1
rs261291	49	15	58680178	1.474e-64	0	1	1
rs261303	49	15	58667377	5.691e-11	0	1	1
rs261338	49	15	58735005	3.356e-15	0	1	1
rs35128881	49	15	58692148	5.826e-21	0	1	1
rs402465	49	15	58705029	2.518e-20	0	1	1
rs515081	49	15	58716257	5.892e-21	0	1	1
rs56903760	49	15	58692681	1.425e-46	0	1	1
rs62000869	49	15	58706911	8.389e-09	0	1	1
rs62001733	49	15	58662090	5.22e-19	0	1	1
rs7163280	49	15	58718340	1.181e-10	0	1	1
rs7165301	49	15	58552606	2.823e-12	0	1	1
rs723967	49	15	58696300	3.295e-17	0	1	0.08297
rs74018729	49	15	58641140	8.494e-14	0	1	1
rs75429347	49	15	58736611	1.046e-15	0	1	1
rs8041059	49	15	58743709	6.543e-13	0	1	1
rs8042092	49	15	58664942	4.314e-13	0	1	1
rs8043310	49	15	58731818	1.15e-40	0	1	1
rs8192701	49	15	58724371	4.135e-09	0	1	1
rs56094641	50	16	53806453	8.838e-18	0	1	1
rs8057044	50	16	53812614	6.347e-10	0	1	1
rs1039331	51	16	56598254	6.918e-09	0	1	1
rs11076174	51	16	57003146	2.732e-62	0	1	1
rs1122390	51	16	56986045	1.075e-21	0	1	1
rs117011262	51	16	57071546	1.978e-09	0	1	1
rs117678160	51	16	56889271	1.178e-24	0	1	1
rs118089749	51	16	57001794	2.36e-25	0	1	1
rs118099751	51	16	56742780	2.982e-08	0	1	1
rs118146573	51	16	57000938	2.872e-15	0	1	1
rs12597250	51	16	57005620	6.339e-16	0	1	1
rs12708980	51	16	57012379	9.697e-66	0	1	1
rs12720898	51	16	57011243	3.767e-09	0	1	1
rs139882624	51	16	56994922	6.452e-13	0	1	1
rs148808285	51	16	56991645	4.709e-10	0	1	1
rs149745393	51	16	57025418	1.351e-19	0	1	1
rs17231506	51	16	56994528	4e-229	0	0.802796	1
rs1865834	51	16	56911640	1.11e-11	0	1	1
rs2289113	51	16	56947275	2.677e-09	0	1	1
rs2303790	51	16	57017292	4.56e-127	0	1	1
rs289708	51	16	57038162	9.347e-13	0	1	1
rs289736	51	16	57031210	8.163e-10	0	1	1
rs289741	51	16	57017474	3.174e-26	0	1	1
rs34433002	51	16	56932531	2.842e-09	0	1	1
rs34602471	51	16	57000242	4.952e-22	0	1	1
rs36229787	51	16	56993897	5.238e-43	0	1	1
rs367772463	51	16	56632196	1.787e-15	0	1	1
rs3764259	51	16	57216877	1.02e-09	0	1	1
rs550450825	51	16	56924744	2.901e-10	0	1	1
rs551794976	51	16	56912379	2.522e-17	0	1	1
rs561673570	51	16	56502633	9.577e-12	0	1	1
rs572564758	51	16	56991610	5.173e-15	0	1	1
rs58476720	51	16	57021203	4.065e-09	0	1	1
rs58514889	51	16	56781735	3.172e-08	0	1	0.1324
rs59515242	51	16	56945049	2.189e-16	0	1	1
rs62035923	51	16	56898198	3.396e-11	0	1	1
rs62035949	51	16	56911676	3.983e-12	0	1	1
rs7185879	51	16	56428008	3.354e-10	0	1	1
rs7203984	51	16	56999258	1.722e-85	0	1	1
rs7204044	51	16	56942709	6.547e-31	0	1	1
rs73561767	51	16	56985837	1.654e-09	0	1	1
rs75148450	51	16	56986803	4.274e-11	0	1	1
rs75429044	51	16	56960147	1.946e-08	0	1	1
rs77045534	51	16	56897990	7.863e-27	0	1	1
rs77712507	51	16	56742475	3.171e-08	0	1	1
rs8053985	51	16	56735317	4.238e-09	0	1	1
rs8055054	51	16	56911038	1.814e-18	0	1	1
rs8059431	51	16	57028451	8.678e-19	0	1	1
rs820299	51	16	57000284	7.614e-11	0	1	1
rs9924087	51	16	57002242	3.47e-21	0	1	1
rs9925265	51	16	56950210	3.111e-17	0	1	1
rs9938160	51	16	56984590	2.824e-08	0	1	1
rs9989419	51	16	56985139	7.265e-12	0	1	1
rs200054031	52	16	68017354	2.597e-10	1	1	1
rs55974400	52	16	68317498	1.112e-11	1	1	1
rs8047343	52	16	68143745	1.837e-09	1	1	1
rs116100746	53	16	81554152	2.844e-08	0	1	1
rs2966090	53	16	81529419	2.854e-08	0	1	1
rs34506659	53	16	81505584	1.956e-10	0	1	1
rs55931203	54	17	65854602	7.139e-09	1	1	1
rs11082764	55	18	47119579	3.386e-39	1	1	1
rs11082769	55	18	47153899	6.149e-19	1	1	1
rs1943973	55	18	47179516	1.293e-16	1	1	1
rs2000813	55	18	47093864	1.55e-11	1	1	1
rs28405356	55	18	47122921	8.025e-11	1	1	1
rs28778033	55	18	47214864	4.044e-08	1	1	1
rs35959939	55	18	47112944	2.944e-08	1	1	0.005218
rs4939883	55	18	47167214	1.498e-16	1	1	1
rs7228085	55	18	47160814	4.519e-10	1	1	1
rs7229377	55	18	47148299	9.92e-10	1	1	5.506e-05
rs72642487	55	18	47114770	7.996e-17	1	1	0.04034
rs72642490	55	18	47207680	9.058e-09	1	1	1
rs73959582	55	18	47148886	1.099e-08	1	1	0.457
rs73959590	55	18	47156188	5.548e-24	1	1	1
rs8090363	55	18	47133828	2.465e-13	1	1	1
rs6567160	56	18	57829135	8.901e-15	0	1	1
rs670593	56	18	57869190	8.789e-09	0	1	1
rs75649442	56	18	57869099	1.626e-08	0	1	0.1453
rs34945223	57	18	77575871	1.182e-09	0	1	0.6068
rs10411534	58	19	11355298	1.004e-08	1	1	1
rs1654404	58	19	11384359	6.493e-14	1	1	1
rs201019550	58	19	11334894	4.177e-23	1	1	1
rs4804579	58	19	11358700	4.168e-14	1	1	1
rs8101206	58	19	11310836	1.865e-12	1	1	1
rs12979148	59	19	19406869	3.923e-12	0	1	0.5473
rs144787624	59	19	19470599	7.321e-09	0	1	1
rs17699261	59	19	19819843	1.715e-08	0	1	0.007611
rs2285626	59	19	19467545	8.106e-14	0	1	0.08933
rs55823486	59	19	19544644	1.694e-17	0	1	1
rs58434384	59	19	19786099	3.973e-22	0	1	0.09145
rs7249692	59	19	19670688	1.65e-11	0	1	0.151
rs1065853	60	19	45413233	5.041e-15	1	1	1
rs112784534	60	19	45444566	1.462e-11	1	1	0.0007216
rs12972970	60	19	45387596	1.141e-11	1	1	1
rs34224078	60	19	45383115	1.855e-08	1	1	1
rs429358	60	19	45411941	6.916e-19	1	1	1
rs12986064	61	19	54755133	7.231e-12	0	1	1
rs427366	61	19	54795299	4.048e-08	0	1	1
rs431420	61	19	54792079	9.697e-13	0	1	1
rs435306	62	20	44538484	1.049e-14	0	1	1
rs6065904	62	20	44534651	4.239e-10	0	1	1
rs6130976	62	20	44579572	9.988e-10	0	1	1
rs131654	63	22	21917190	4.626e-17	1	1	1
rs464161	63	22	21815928	6.543e-09	1	1	1
rs5754422	63	22	21980257	8.348e-21	1	1	1

## Sheet: S7
Group	SNV	nsnps	PP.H0.abf	PP.H1.abf	PP.H2.abf	PP.H3.abf	PP.H4.abf	H4/(H3+H4)
BMI-EUR	rs12748679	2036	3.29e-42	6.79e-40	0.000802962	0.165033	0.834164	0.834835
BMI-EUR	rs2821239	2029	1.12e-54	4.04e-51	6.72e-06	0.0233353	0.976658	0.976665
BMI-EUR	rs16827974	2212	1.54e-05	0.0113837	0.000392561	0.290402	0.697806	0.706132
BMI-EUR	rs73185911	2235	1.64e-05	0.0117766	0.000358135	0.256835	0.731014	0.740005
BMI-EUR	rs11030099	1674	1.07e-79	2.18e-80	0.184041	0.0368841	0.779075	0.954797
BMI-EUR	rs10896022	1381	7.4e-10	4.6e-10	0.0170103	0.00959983	0.97339	0.990234
Body mass index-EAS	rs464161	334	0.951787	0.0115841	0.0349108	0.000423602	0.00129425	0.753412
Diastolic blood pressure-EAS	rs11065836	528	0.891982	0.0360807	0.0611018	0.0024632	0.00837257	0.772679
Diastolic blood pressure-EAS	rs11066015	690	0.851528	0.0462079	0.0819712	0.00443228	0.0158603	0.781581
Diastolic blood pressure-EAS	rs3858704	558	0.888557	0.0358607	0.0645983	0.00259869	0.00838519	0.763409
Diastolic blood pressure-EAS	rs464161	334	0.954719	0.0116198	0.0320878	0.000389354	0.00118428	0.752577
glucose measurement-EAS	rs464161	334	0.954349	0.0116153	0.0324634	0.000393931	0.00117856	0.749487
High density lipoprotein cholesterol levels-EAS	rs11065836	527	0.608533	0.0246059	0.165568	0.00649991	0.194793	0.967709
High density lipoprotein cholesterol levels-EAS	rs11066015	690	0.193969	0.0105256	0.402623	0.0214768	0.371406	0.945335
High density lipoprotein cholesterol levels-EAS	rs3858704	557	0.606501	0.0244681	0.168345	0.00659744	0.194088	0.967126
High density lipoprotein cholesterol levels-EAS	rs464161	334	0.804398	0.00979027	0.175738	0.00213095	0.00794209	0.78845
High density lipoprotein cholesterol levels-EUR	rs12749263	66	0.992163	0.00229649	0.00542878	1.25e-05	9.93e-05	0.888193
High density lipoprotein cholesterol levels-EUR	rs2182869	65	0.99583	0.00285597	0.00122013	3.41e-06	9e-05	0.963494
High density lipoprotein cholesterol levels-EUR	rs56115463	86	0.988759	0.00362142	0.0074572	2.72e-05	0.000135583	0.832906
High density lipoprotein cholesterol levels-EUR	rs58583743	164	0.991725	0.00505131	0.00307387	1.55e-05	0.000134231	0.896481
High density lipoprotein cholesterol levels-EUR	rs6661669	69	0.99622	0.00255291	0.00114344	2.85e-06	8.1e-05	0.966011
High density lipoprotein cholesterol levels-EUR	rs1392816	110	0.980884	0.0174154	0.00135833	2.38e-05	0.000318248	0.930419
High density lipoprotein cholesterol levels-EUR	rs6588183	112	0.973557	0.021825	0.00305786	6.71e-05	0.00149324	0.956997
High density lipoprotein cholesterol levels-EUR	rs12137231	82	0.0763715	0.00329392	0.0388152	0.00079338	0.880726	0.9991
High density lipoprotein cholesterol levels-EUR	rs12748679	66	5.95e-07	2.15e-06	0.000897556	0.00224386	0.996856	0.997754
High density lipoprotein cholesterol levels-EUR	rs2815749	72	0.990552	0.00684799	0.00235704	1.61e-05	0.000227155	0.933814
High density lipoprotein cholesterol levels-EUR	rs2821239	70	6.54e-12	1.23e-08	4.82e-05	0.0897537	0.910198	0.910242
High density lipoprotein cholesterol levels-EUR	rs7531118	68	0.993415	0.00311796	0.00311936	9.45e-06	0.000338153	0.972814
High density lipoprotein cholesterol levels-EUR	rs782239	75	0.973825	0.0141244	0.00314263	3.67e-05	0.00887118	0.99588
High density lipoprotein cholesterol levels-EUR	rs2178198	420	0.972935	0.0147985	0.0114382	0.000173322	0.000655182	0.790801
High density lipoprotein cholesterol levels-EUR	rs3792252	452	0.967516	0.0196191	0.0118568	0.000239662	0.000768552	0.762291
High density lipoprotein cholesterol levels-EUR	rs6758814	668	0.950823	0.032582	0.0148424	0.000507363	0.00124507	0.71048
High density lipoprotein cholesterol levels-EUR	rs74446114	474	0.968929	0.0182853	0.0118792	0.000223497	0.000683199	0.753504
High density lipoprotein cholesterol levels-EUR	rs11711127	562	0.00996717	0.835673	0.000229511	0.0191078	0.135022	0.876028
High density lipoprotein cholesterol levels-EUR	rs12489588	556	0.868471	0.112137	0.012116	0.00155871	0.00571725	0.785773
High density lipoprotein cholesterol levels-EUR	rs16827974	599	0.000162466	0.039627	0.00019873	0.0475595	0.912452	0.950459
High density lipoprotein cholesterol levels-EUR	rs73185911	583	0.000154446	0.0409397	0.000196825	0.051266	0.907443	0.946526
High density lipoprotein cholesterol levels-EUR	rs695110	551	0.55604	0.015187	0.385838	0.0105059	0.0324288	0.755305
High density lipoprotein cholesterol levels-EUR	rs11020133	519	0.857039	0.127005	0.00873755	0.00128889	0.00593043	0.821467
High density lipoprotein cholesterol levels-EUR	rs4331050	506	0.82788	0.155534	0.00886792	0.00165996	0.00605795	0.784921
High density lipoprotein cholesterol levels-EUR	rs117121174	136	0.984627	0.00573609	0.00913871	5.28e-05	0.000445468	0.894033
High density lipoprotein cholesterol levels-EUR	rs11832104	96	1.67e-12	8.18e-15	0.982932	0.00480818	0.01226	0.718295
High density lipoprotein cholesterol levels-EUR	rs4766638	141	0.987154	0.00795385	0.00442306	3.52e-05	0.000433915	0.924965
High density lipoprotein cholesterol levels-EUR	rs7313797	187	0.982896	0.00639278	0.0103068	6.67e-05	0.000337659	0.835048
High density lipoprotein cholesterol levels-EUR	rs10773112	45	0.953836	0.00145218	0.0442176	6.69e-05	0.000427273	0.864622
High density lipoprotein cholesterol levels-EUR	rs12424178	38	0.00202374	1.44e-06	0.991681	0.000701423	0.00559286	0.888562
High density lipoprotein cholesterol levels-EUR	rs1727307	49	5.31e-69	7.5e-72	0.976973	0.00135719	0.0216697	0.941061
High density lipoprotein cholesterol levels-EUR	rs201750024	44	0.995099	0.00141335	0.00338297	4.7e-06	0.000100358	0.955263
High density lipoprotein cholesterol levels-EUR	rs7315453	48	5.25e-06	6.94e-09	0.95452	0.0012162	0.0442587	0.973256
High density lipoprotein cholesterol levels-EUR	rs73231950	48	3.91e-06	9.25e-09	0.988576	0.00232651	0.00909395	0.796286
High density lipoprotein cholesterol levels-EUR	rs921919	37	0.00202376	1.42e-06	0.99169	0.000692198	0.00559291	0.889867
High density lipoprotein cholesterol levels-EUR	rs3742899	69	0.996039	0.00249121	0.00138418	3.38e-06	8.21e-05	0.960459
High density lipoprotein cholesterol levels-EUR	rs3803300	76	0.993265	0.00289492	0.00360187	1.03e-05	0.000228103	0.956796
Low density lipoprotein cholesterol levels-EUR	rs3768320	282	0.986594	0.00903469	0.00399084	3.62e-05	0.00034436	0.904877
Low density lipoprotein cholesterol levels-EUR	rs3820615	191	0.977496	0.0129771	0.0089083	0.000117764	0.000501268	0.809761
Low density lipoprotein cholesterol levels-EUR	rs58302493	281	0.986706	0.00882979	0.00407857	3.61e-05	0.000349489	0.906377
Low density lipoprotein cholesterol levels-EUR	rs58583743	322	0.770986	0.00686672	0.214935	0.001909	0.00530259	0.735287
Low density lipoprotein cholesterol levels-EUR	rs1392816	202	0.967725	0.0276861	0.00408263	0.000116412	0.000389798	0.770032
Low density lipoprotein cholesterol levels-EUR	rs2815749	142	0.985446	0.0106439	0.0031601	3.34e-05	0.000716258	0.955446
Low density lipoprotein cholesterol levels-EUR	rs7531118	142	0.989172	0.00712328	0.00333091	2.36e-05	0.00034985	0.936805
Low density lipoprotein cholesterol levels-EUR	rs782239	187	0.97872	0.0179995	0.00300753	5.51e-05	0.000218302	0.798465
Low density lipoprotein cholesterol levels-EUR	rs9479500	1061	0.928181	0.0519901	0.0166145	0.000928338	0.00228629	0.711214
Low density lipoprotein cholesterol levels-EUR	rs531971155	697	0.956342	0.0293831	0.0126993	0.000388993	0.00118648	0.753095
Low density lipoprotein cholesterol levels-EUR	rs75326924	627	0.964256	0.0229068	0.0115832	0.000274191	0.000979727	0.781333
Low density lipoprotein cholesterol levels-EUR	rs11066015	239	1.66e-17	4.21e-19	0.817936	0.0206483	0.161416	0.886588
Low density lipoprotein cholesterol levels-EUR	rs117121174	284	0.978955	0.011211	0.00931922	0.000106315	0.000408422	0.793458
Low density lipoprotein cholesterol levels-EUR	rs4766638	325	0.968673	0.0140423	0.0161189	0.000232734	0.000933069	0.800366
Low density lipoprotein cholesterol levels-EUR	rs7313797	402	0.972978	0.0119265	0.0141266	0.000172365	0.000796362	0.822071
Low density lipoprotein cholesterol levels-EUR	rs10773112	81	0.993932	0.00276003	0.0031523	8.61e-06	0.000146705	0.944564
Low density lipoprotein cholesterol levels-EUR	rs12424178	86	0.996724	0.00176776	0.00141308	2.41e-06	9.31e-05	0.974767
Low density lipoprotein cholesterol levels-EUR	rs1727307	102	7.28e-11	3.25e-13	0.974201	0.00432043	0.0214789	0.832537
Low density lipoprotein cholesterol levels-EUR	rs201750024	73	0.996687	0.00209676	0.00115292	2.36e-06	6.1e-05	0.962753
Low density lipoprotein cholesterol levels-EUR	rs7315453	86	0.982088	0.0042276	0.0132097	5.64e-05	0.000417964	0.881104
Low density lipoprotein cholesterol levels-EUR	rs73231950	85	0.993422	0.00416683	0.00226942	9.39e-06	0.000132245	0.933703
Low density lipoprotein cholesterol levels-EUR	rs921919	90	0.996873	0.00170003	0.00133502	2.19e-06	8.96e-05	0.976141
Low density lipoprotein cholesterol levels-EUR	rs3742899	150	0.989568	0.00653487	0.00364212	2.38e-05	0.000231569	0.906802
Low density lipoprotein cholesterol levels-EUR	rs3803300	177	0.990508	0.00579538	0.00345283	2e-05	0.000224062	0.918054
Systolic blood pressure-EAS	rs11065836	528	0.893638	0.0361478	0.060214	0.00242809	0.00757186	0.75719
Systolic blood pressure-EAS	rs11066015	690	0.85775	0.0465455	0.0801285	0.00433691	0.011239	0.721564
Systolic blood pressure-EAS	rs3858704	558	0.889923	0.0359158	0.0639676	0.002574	0.00761981	0.747494
Systolic blood pressure-EAS	rs464161	334	0.955087	0.0116243	0.0317411	0.000385156	0.00116287	0.751196
Total cholesterol levels-EUR	rs3768320	282	0.986989	0.00905012	0.00363257	3.3e-05	0.000295502	0.899544
Total cholesterol levels-EUR	rs3820615	191	0.982092	0.0130381	0.00448256	5.92e-05	0.000328202	0.847187
Total cholesterol levels-EUR	rs58302493	281	0.986967	0.00884394	0.00384665	3.42e-05	0.000308482	0.900199
Total cholesterol levels-EUR	rs1392816	201	0.968426	0.0276111	0.00347754	9.88e-05	0.000386891	0.796578
Total cholesterol levels-EUR	rs2815749	142	0.983536	0.0106232	0.00454793	4.79e-05	0.00124465	0.962941
Total cholesterol levels-EUR	rs7531118	141	0.989548	0.00706853	0.00290834	2.03e-05	0.000454723	0.957265
Total cholesterol levels-EUR	rs782239	186	0.97917	0.017908	0.00268217	4.89e-05	0.000190542	0.795775
Total cholesterol levels-EUR	rs531971155	700	0.952873	0.0289116	0.0164552	0.000498013	0.00126174	0.716999
Total cholesterol levels-EUR	rs75326924	631	0.961055	0.0229967	0.0144867	0.000345529	0.00111625	0.763625
Total cholesterol levels-EUR	rs117121174	282	0.96645	0.0109972	0.0217185	0.000246546	0.000587325	0.704336
Total cholesterol levels-EUR	rs10773112	81	0.895022	0.00248537	0.101369	0.000280647	0.000842699	0.750169
Total cholesterol levels-EUR	rs12424178	86	0.996993	0.00176824	0.00117799	2.03e-06	5.88e-05	0.966628
Total cholesterol levels-EUR	rs1727307	102	4.9e-43	2.19e-45	0.974118	0.00431998	0.0215622	0.83309
Total cholesterol levels-EUR	rs201750024	73	0.99492	0.00209304	0.00287933	5.96e-06	0.000101792	0.944688
Total cholesterol levels-EUR	rs7315453	86	0.875052	0.00376684	0.117459	0.000502406	0.00321962	0.865018
Total cholesterol levels-EUR	rs73231950	84	0.993449	0.00403325	0.00236677	9.47e-06	0.000141848	0.937417
Total cholesterol levels-EUR	rs921919	90	0.997127	0.00170046	0.00111533	1.85e-06	5.54e-05	0.967686
Total cholesterol levels-EUR	rs3742899	150	0.990667	0.00654213	0.00259062	1.69e-05	0.000183258	0.915567
Total cholesterol levels-EUR	rs3803300	177	0.990604	0.00579594	0.00337034	1.95e-05	0.000210638	0.915268
Total cholesterol levels-EUR	rs7185879	2554	0.000701488	9.85e-05	0.658327	0.0922194	0.248653	0.729461
Triglyceride levels-EUR	rs1392816	201	0.968776	0.0276211	0.00294957	8.35e-05	0.000570275	0.87228
Triglyceride levels-EUR	rs6588183	190	0.952422	0.0405267	0.00482976	0.000203494	0.00201801	0.908398
Triglyceride levels-EUR	rs12137231	158	0.0088836	0.000818869	0.28248	0.0253559	0.682461	0.964177
Triglyceride levels-EUR	rs12748679	156	1.28e-07	1.22e-06	0.000910089	0.00763054	0.991458	0.992362
Triglyceride levels-EUR	rs2815749	142	0.982888	0.0106162	0.00612418	6.58e-05	0.000305337	0.822707
Triglyceride levels-EUR	rs7531118	140	0.356161	0.0025333	0.451618	0.0030256	0.186662	0.98405
Triglyceride levels-EUR	rs782239	187	0.111615	0.0020527	0.151031	0.00204435	0.733256	0.99722
Triglyceride levels-EUR	rs11711127	1152	0.00718472	0.71169	0.000214362	0.0209739	0.259937	0.925336
Triglyceride levels-EUR	rs16827974	1181	0.000803644	0.37215	0.000135409	0.0621403	0.564771	0.900879
Triglyceride levels-EUR	rs73185911	1151	0.000809167	0.385114	0.000134426	0.0634282	0.550515	0.896687
Triglyceride levels-EUR	rs531971155	699	0.951712	0.0288723	0.0176083	0.000532913	0.00127441	0.705137
Triglyceride levels-EUR	rs75326924	630	0.962788	0.0229971	0.0129273	0.0003078	0.000979685	0.760929
Triglyceride levels-EUR	rs12828640	197	0.000109375	1.34e-06	0.958247	0.0117195	0.0299231	0.718569
Triglyceride levels-EUR	rs2040571	191	0.000158798	1.86e-06	0.946077	0.0110095	0.0427526	0.795218
Triglyceride levels-EUR	rs2078847	184	0.000158921	1.82e-06	0.946248	0.0108067	0.0427843	0.798349
Triglyceride levels-EUR	rs10773112	82	0.994862	0.0027765	0.00222314	6.07e-06	0.000132073	0.95606
Triglyceride levels-EUR	rs12424178	87	0.996814	0.00183326	0.00128024	2.28e-06	7.03e-05	0.968586
Triglyceride levels-EUR	rs201750024	74	0.995984	0.00210918	0.00179853	3.7e-06	0.000104602	0.965836
Triglyceride levels-EUR	rs921919	90	0.997434	0.00170099	0.000821625	1.36e-06	4.2e-05	0.968635
Triglyceride levels-EUR	rs3803300	177	0.989744	0.00579091	0.00418947	2.43e-05	0.000251654	0.911942
Waist circumference-EUR	rs12748679	630	0.00365147	0.753906	3.22e-05	0.00641401	0.235997	0.973541
Waist circumference-EUR	rs2821239	662	8.89e-06	0.0321676	7.11e-06	0.0247629	0.943054	0.974414
Waist circumference-EUR	rs11693959	444	0.996737	0.001334	0.00191964	2.56e-06	6.52e-06	0.718062
Waist circumference-EUR	rs1659684	505	0.996306	0.00144255	0.0022396	3.23e-06	8.37e-06	0.721552
Waist circumference-EUR	rs4665963	423	0.996772	0.00122732	0.00199077	2.44e-06	7.12e-06	0.74477
Waist circumference-EUR	rs9825670	496	0.994118	0.00288717	0.00295976	8.57e-06	2.69e-05	0.758387
Waist circumference-EUR	rs9831948	374	0.994907	0.0023632	0.00269382	6.37e-06	2.93e-05	0.821419
Waist circumference-EUR	rs71556729	223	0.992454	0.00706307	0.000464442	3.29e-06	1.54e-05	0.82397
Waist circumference-EUR	rs11030099	595	0.0276077	0.00397723	0.239434	0.0337984	0.695183	0.953636
Waist circumference-EUR	rs641325	576	0.593299	0.388931	0.00357263	0.00233013	0.0118675	0.835879
Waist circumference-EUR	rs10896022	533	0.588821	0.325979	0.00529269	0.00285305	0.0770543	0.964296
Waist circumference-EUR	rs11066015	371	0.957503	0.0359258	0.0057036	0.000213347	0.000654047	0.754037
Waist circumference-EUR	rs1039331	985	0.928529	0.00557563	0.062528	0.000372473	0.00299515	0.889396
Waist circumference-EUR	rs367772463	1004	0.928076	0.0061422	0.0623821	0.000409868	0.00298948	0.879428
Waist circumference-EUR	rs561673570	1011	0.915887	0.00602902	0.074543	0.000487642	0.00305326	0.862283
Waist circumference-EUR	rs7185879	993	0.916592	0.00530236	0.0746232	0.000428631	0.00305385	0.876918
Waist circumference-EUR	rs200054031	357	0.998086	0.000711646	0.00119913	8.52e-07	2.72e-06	0.761478
Waist circumference-EUR	rs55974400	681	0.996408	0.00147907	0.00209199	3.09e-06	1.75e-05	0.849927
Waist circumference-EUR	rs8047343	486	0.997772	0.000938383	0.0012858	1.21e-06	2.84e-06	0.701235

## Sheet: S8
ensg	symbol	chr	start	end	strand	type	entrezID	HUGO	pLI	ncRVIS	posMapSNPs	posMapMaxCADD	eqtlMapSNPs	eqtlMapminP	eqtlMapminQ	eqtlMapts	eqtlDirection	ciMap	ciMapts	minGwasP	IndSigSNPs	GenomicLocus
ENSG00000157873	TNFRSF14	1	2487078	2496821	1	protein_coding	8764	TNFRSF14	0.819999	-0.131268	0	0	6	8.7881e-07	0.00732283	eQTLGen_trans_eQTLs	NA	No	NA	0.003258	rs3858704	45
ENSG00000187017	ESPN	1	6484848	6521430	1	protein_coding	83715	ESPN	0.00255384	NA	0	0	1	6.3377e-06	0.0400579	eQTLGen_trans_eQTLs	NA	No	NA	NA	rs2285626;rs12979148;rs7249692	59
ENSG00000215788	TNFRSF25	1	6521211	6526255	-1	protein_coding	8718	TNFRSF25	0.448739	NA	0	0	4	5.0029e-07	0.00441223	eQTLGen_trans_eQTLs	NA	No	NA	NA	rs3858704	45
ENSG00000049246	PER3	1	7844380	7905237	1	protein_coding	8863	PER3	2.19068e-10	-0.648392	0	0	3	3.0178e-08	0.000380897	eQTLGen_trans_eQTLs	NA	No	NA	1.612e-20	rs730497	22
ENSG00000162496	DHRS3	1	12627939	12677737	-1	protein_coding	9249	DHRS3	0.66136	1.37192	0	0	8	4.3969e-12	0	eQTLGen_trans_eQTLs	NA	No	NA	0.003258	rs3858704	45
ENSG00000171729	TMEM51	1	15479028	15546976	1	protein_coding	55092	TMEM51	0.870759	1.31653	0	0	3	2.3354e-06	0.0174731	eQTLGen_trans_eQTLs	NA	No	NA	NA	rs3858704	45
ENSG00000173369	C1QB	1	22979255	22988031	1	protein_coding	713	C1QB	0.085881	0.026533	0	0	5	4.3483e-06	0.029364	eQTLGen_trans_eQTLs	NA	No	NA	NA	rs3858704	45
ENSG00000185436	IFNLR1	1	24480647	24514449	-1	protein_coding	163702	IFNLR1	0.308615	1.83986	0	0	8	1.3081e-09	5.81508e-05	eQTLGen_trans_eQTLs	NA	No	NA	0.003258	rs3858704	45
ENSG00000117602	RCAN3	1	24829387	24867530	1	protein_coding	11123	RCAN3	0.00320642	1.10694	0	0	6	3.4601e-08	0.000447847	eQTLGen_trans_eQTLs	NA	No	NA	NA	rs3858704	45
ENSG00000157978	LDLRAP1	1	25870071	25895377	1	protein_coding	26119	LDLRAP1	2.90077e-05	-0.605728	0	0	6	8.1942e-08	0.00103448	eQTLGen_trans_eQTLs	NA	No	NA	0.003258	rs3858704	45
ENSG00000176083	ZNF683	1	26688125	26701013	-1	protein_coding	257101	ZNF683	0.0015607	0.00119826	0	0	8	1.1766e-09	3.90701e-05	eQTLGen_trans_eQTLs	NA	No	NA	0.003258	rs3858704	45
ENSG00000158315	RHBDL2	1	39351479	39407471	-1	protein_coding	54933	RHBDL2	2.70128e-06	0.690584	0	0	8	4.33929e-05	0.0370909	GTEx/v8/Artery_Tibial	NA	Yes	Mesenchymal_Stem_Cell	2.81e-11	rs58302493;rs3768320;rs3768320:rs58302493	1
ENSG00000174574	AKIRIN1	1	39456895	39471731	1	protein_coding	79647	AKIRIN1	0.672016	-0.504509	0	0	4	2.09588e-06	1.4346e-31	GTEx/v8/Esophagus_Gastroesophageal_Junction:GTEx/v8/Cells_Cultured_fibroblasts:GTEx/v8/Skin_Not_Sun_Exposed_Suprapubic:GTEx/v6/Brain_Cortex	NA	Yes	Adult_Cortex:Left_Ventricle:IMR90:Mesenchymal_Stem_Cell:Mesendoderm:Trophoblast-like_Cell:hESC	1.958e-11	rs58302493;rs3820615;rs3768320;rs3768320:rs58302493:rs58302493;rs3820615:rs3820615	1
ENSG00000168653	NDUFS5	1	39491990	39500308	1	protein_coding	4725	NDUFS5	0.0982173	-0.0686821	0	0	200	6.5007e-29	0	PsychENCODE_eQTLs:eQTLGen_cis_eQTLs:CMC_SVA_cis:GTEx/v8/Artery_Tibial:GTEx/v8/Skin_Not_Sun_Exposed_Suprapubic:GTEx/v8/Skin_Sun_Exposed_Lower_leg:GTEx/v7/Thyroid	NA	Yes	Promoter_anchored_loops:Adult_Cortex:Fetal_Cortex:Left_Ventricle:GM12878:IMR90:Mesenchymal_Stem_Cell:Mesendoderm:Trophoblast-like_Cell:hESC	1.958e-11	rs58302493;rs3768320;rs3820615;rs3768320:rs58302493:rs3820615	1
ENSG00000127603	MACF1	1	39546988	39952849	1	protein_coding	23499	MACF1	1	-0.44543	233	18.21	307	3.27170000000001e-310	0	eQTLcatalogue/BLUEPRINT_ge_T-cell:eQTLcatalogue/Fairfax_2012_B-cell_CD19:eQTLcatalogue/Kasela_2017_T-cell_CD4:eQTLcatalogue/Kasela_2017_T-cell_CD8:eQTLcatalogue/TwinsUK_ge_fat:PsychENCODE_eQTLs:DICE/T_CD4_naive:DICE/T_CD4_naive_activated:DICE/T_CD8_naive:DICE/T_CD8_naive_activated:DICE/Monocyte_non_classical:eQTLGen_cis_eQTLs:eQTLGen_trans_eQTLs:BIOSQTL/BIOS_eQTL_geneLevel:CMC_SVA_cis:GTEx/v8/Eso…	NA	Yes	Adult_Cortex:Fetal_Cortex:Left_Ventricle:Liver:Spleen:GM12878:IMR90:Mesenchymal_Stem_Cell:Mesendoderm:Trophoblast-like_Cell:hESC	1.958e-11	rs58302493;rs3768320;rs3820615;rs3858704;rs3768320:rs58302493:rs58302493;rs3820615:rs3820615	01:45:00
ENSG00000255103	KIAA0754	1	39876151	39882154	1	protein_coding	643314	KIAA0754	0.0210361	NA	15	14.68	27	1.55218e-06	0.00397264	DICE/T_CD4_TH1:GTEx/v7/Cells_Transformed_fibroblasts:GTEx/v7/Thyroid	NA	Yes	Promoter_anchored_loops:Aorta:Left_Ventricle:Liver:GM12878:IMR90:Mesenchymal_Stem_Cell:Mesendoderm:Trophoblast-like_Cell:hESC	1.958e-11	rs58302493;rs3768320;rs3768320:rs58302493:rs58302493;rs3820615:rs3820615	1
ENSG00000183682	BMP8A	1	39957318	39991607	1	protein_coding	353500	BMP8A	0.456963	NA	63	21	345	2.72699e-76	0	TIGER/Nom_Alonso_Pancreatic_islets:Nom_InsPIRE_Islets_Gene_eQTLs_Nominal_Pvalues:eQTLcatalogue/Alasoo_2018_ge_macrophage_Salmonella:eQTLcatalogue/GENCORD_ge_LCL:eQTLcatalogue/GEUVADIS_ge_LCL:eQTLcatalogue/HipSci_ge_iPSC:eQTLcatalogue/Quach_2016_ge_monocyte_naive:eQTLcatalogue/Quach_2016_ge_monocyte_Pam3CSK4:eQTLcatalogue/Schwartzentruber_2018_ge_sensory_neuron:eQTLcatalogue/TwinsUK_ge_fat:eQTLcat…	NA	Yes	Adult_Cortex:Aorta:Left_Ventricle:Liver:Right_Ventricle:GM12878:IMR90:Mesenchymal_Stem_Cell:Mesendoderm:Trophoblast-like_Cell:hESC	1.958e-11	rs3768320;rs58302493;rs3820615;rs3768320:rs58302493:rs58302493;rs3820615:rs3820615	1
ENSG00000090621	PABPC4	1	40026488	40042462	-1	protein_coding	100996696	PABPC4	0.992493	NA	46	20.6	338	8.7029e-105	0	eQTLcatalogue/BLUEPRINT_ge_T-cell:eQTLcatalogue/CEDAR_T-cell_CD4:eQTLcatalogue/CEDAR_T-cell_CD8:eQTLcatalogue/Fairfax_2012_B-cell_CD19:eQTLcatalogue/Fairfax_2014_IFN24:eQTLcatalogue/GENCORD_ge_fibroblast:eQTLcatalogue/GENCORD_ge_LCL:eQTLcatalogue/GENCORD_ge_T-cell:eQTLcatalogue/GEUVADIS_ge_LCL:eQTLcatalogue/Lepik_2017_ge_blood:eQTLcatalogue/TwinsUK_ge_fat:eQTLcatalogue/TwinsUK_ge_LCL:eQTLcatalogu…	NA	Yes	Adult_Cortex:Fetal_Cortex:Aorta:Left_Ventricle:Liver:Lung:Pancreas:Spleen:GM12878:IMR90:Mesenchymal_Stem_Cell:Mesendoderm:Neural_Progenitor_Cell:Trophoblast-like_Cell:hESC	1.958e-11	rs58302493;rs3768320;rs3820615;rs58302493:rs3768320:rs58302493;rs3820615:rs3820615	1
ENSG00000163909	HEYL	1	40089825	40105617	-1	protein_coding	26508	HEYL	6.80881e-07	-0.347854	11	9.728	5	2.04752e-06	1.21017e-16	GTEx/v8/Muscle_Skeletal:GTEx/v7/Muscle_Skeletal	NA	Yes	Adult_Cortex:Liver:Lung:Spleen:GM12878:IMR90:Mesenchymal_Stem_Cell:Mesendoderm:Trophoblast-like_Cell:hESC	1.958e-11	rs3768320;rs58302493;rs3820615;rs3768320:rs58302493:rs3820615	1
ENSG00000116981	NT5C1A	1	40124793	40137710	-1	protein_coding	84618	NT5C1A	8.15239e-05	-0.103966	17	12.64	26	5.2039e-09	1.25799e-11	eQTLcatalogue/GENCORD_ge_T-cell:PsychENCODE_eQTLs:CMC_SVA_cis:CMC_NoSVA_cis:GTEx/v8/Artery_Tibial:GTEx/v8/Heart_Left_Ventricle:GTEx/v8/Muscle_Skeletal:GTEx/v7/Muscle_Skeletal:GTEx/v6/Muscle_Skeletal	NA	Yes	Aorta:Left_Ventricle:Liver:Lung:Pancreas:Spleen:GM12878:IMR90:Mesenchymal_Stem_Cell:Mesendoderm:Neural_Progenitor_Cell:Trophoblast-like_Cell:hESC	1.958e-11	rs3820615;rs3768320;rs3768320:rs58302493:rs58302493;rs3820615:rs3820615	1
ENSG00000116983	HPCAL4	1	40144320	40157361	-1	protein_coding	51440	HPCAL4	0.0184228	2.62482	15	12.05	294	3.7245e-195	0	EyeGEx:eQTLcatalogue/CEDAR_T-cell_CD4:eQTLcatalogue/CEDAR_T-cell_CD8:eQTLcatalogue/Lepik_2017_ge_blood:PsychENCODE_eQTLs:eQTLGen_cis_eQTLs:BIOSQTL/BIOS_eQTL_geneLevel:xQTLServer_eQTLs:GTEx/v8/Whole_Blood:GTEx/v8/Brain_Frontal_Cortex_BA9:GTEx/v8/Esophagus_Muscularis:GTEx/v8/Lung:GTEx/v8/Pancreas:GTEx/v8/Pituitary:GTEx/v8/Thyroid:GTEx/v7/Whole_Blood:GTEx/v7/Lung:GTEx/v7/Pancreas:GTEx/v6/Whole_Blood	NA	Yes	Aorta:Left_Ventricle:Liver:Lung:Pancreas:Spleen:GM12878:IMR90:Mesenchymal_Stem_Cell:Mesendoderm:Neural_Progenitor_Cell:Trophoblast-like_Cell:hESC	1.958e-11	rs3820615;rs58302493;rs3768320;rs3768320:rs58302493:rs58302493;rs3820615:rs3820615	1
ENSG00000084072	PPIE	1	40157854	40229586	1	protein_coding	10450	PPIE	0.98081	-0.248899	6	7.384	156	1.9395e-33	0	eQTLcatalogue/TwinsUK_ge_LCL:eQTLGen_cis_eQTLs:BIOSQTL/BIOS_eQTL_geneLevel:xQTLServer_eQTLs:BRAINEAC/SNIG:GTEx/v8/Adrenal_Gland:GTEx/v8/Esophagus_Mucosa:GTEx/v8/Nerve_Tibial:GTEx/v8/Cells_Cultured_fibroblasts:GTEx/v8/Skin_Sun_Exposed_Lower_leg	NA	Yes	Aorta:Left_Ventricle:Liver:Lung:Pancreas:Spleen:GM12878:IMR90:Mesenchymal_Stem_Cell:Mesendoderm:Neural_Progenitor_Cell:Trophoblast-like_Cell:hESC	1.958e-11	rs3820615;rs58302493;rs3768320;rs3768320:rs58302493:rs58302493;rs3820615:rs3820615	1
ENSG00000116985	BMP8B	1	40222854	40254533	-1	protein_coding	656	BMP8B	0.77453	-0.688572	0	0	92	5.5649e-27	0	eQTLcatalogue/Fairfax_2012_B-cell_CD19:BIOSQTL/BIOS_eQTL_geneLevel:GTEx/v8/Thyroid:GTEx/v7/Thyroid:GTEx/v6/Thyroid	NA	Yes	Adult_Cortex:GM12878:IMR90:Mesenchymal_Stem_Cell	2.374e-11	rs3768320;rs58302493;rs3820615;rs3768320:rs58302493:rs3820615	1
ENSG00000198754	OXCT2	1	40235195	40237020	-1	protein_coding	64064	OXCT2	NA	NA	0	0	190	2.29028e-12	2.74687e-22	PsychENCODE_eQTLs:GTEx/v8/Adipose_Subcutaneous:GTEx/v8/Artery_Aorta:GTEx/v8/Artery_Coronary:GTEx/v8/Artery_Tibial:GTEx/v8/Esophagus_Mucosa:GTEx/v8/Esophagus_Muscularis:GTEx/v8/Heart_Atrial_Appendage:GTEx/v8/Heart_Left_Ventricle:GTEx/v8/Muscle_Skeletal:GTEx/v8/Ovary:GTEx/v8/Cells_Cultured_fibroblasts:GTEx/v8/Stomach:GTEx/v8/Testis:GTEx/v8/Thyroid:GTEx/v7/Artery_Tibial:GTEx/v7/Esophagus_Muscularis:…	NA	Yes	Promoter_anchored_loops:Bladder:Left_Ventricle:Spleen:GM12878:IMR90:Mesenchymal_Stem_Cell:Mesendoderm:Trophoblast-like_Cell:hESC	1.958e-11	rs3768320;rs58302493;rs3768320:rs58302493:rs58302493;rs3820615:rs3820615	1
ENSG00000043514	TRIT1	1	40306723	40349183	-1	protein_coding	54802	TRIT1	9.42969e-10	0.825791	0	0	4	7.1003e-07	1.70299e-14	eQTLGen_cis_eQTLs:BIOSQTL/BIOS_eQTL_geneLevel:GTEx/v8/Thyroid	NA	Yes	Mesenchymal_Stem_Cell	2.81e-11	rs3768320;rs3820615;rs3768320:rs58302493	1
ENSG00000116990	MYCL	1	40361098	40367928	-1	protein_coding	4610	MYCL	0.358812	0.239147	0	0	2	6.56092e-06	0.0256536	GTEx/v7/Spleen	NA	Yes	Adult_Cortex:GM12878:IMR90:Mesenchymal_Stem_Cell	2.81e-11	rs3820615;rs3768320:rs58302493:rs58302493;rs3820615:rs3820615	1
ENSG00000131236	CAP1	1	40505905	40538321	1	protein_coding	10487	CAP1	0.585941	-0.503005	0	0	1	3.31184e-05	0.0426652	GTEx/v7/Testis	NA	Yes	IMR90:Mesenchymal_Stem_Cell	2.81e-11	rs3768320;rs3768320:rs58302493:rs58302493;rs3820615:rs3820615	1
ENSG00000131238	PPT1	1	40538379	40563375	-1	protein_coding	5538	PPT1	3.75207e-05	-0.0483431	0	0	7	1.162e-09	1.31105e-05	eQTLGen_cis_eQTLs	NA	No	NA	2.374e-11	rs3768320;rs58302493;rs3820615	1
ENSG00000084073	ZMPSTE24	1	40723779	40759856	1	protein_coding	10269	ZMPSTE24	1.25001e-07	-0.580813	0	0	2	3.80888e-05	1.57627e-21	GTEx/v8/Cells_Cultured_fibroblasts:GTEx/v7/Testis	NA	No	NA	NA	rs3768320	1
ENSG00000187801	ZFP69B	1	40915774	40929390	1	protein_coding	65243	ZFP69B	2.52121e-09	-0.168664	0	0	4	2.31989e-06	0.0117656	eQTLcatalogue/van_de_Bunt_2015_ge_pancreatic_islet:GTEx/v7/Brain_Nucleus_accumbens_basal_ganglia	NA	No	NA	3.976e-09	rs3820615	1
ENSG00000162366	PDZK1IP1	1	47649265	47656716	-1	protein_coding	10158	PDZK1IP1	0.000484065	-0.343318	0	0	18	1.8486e-08	0.000247028	eQTLGen_trans_eQTLs	NA	No	NA	2.972e-20	rs2285626;rs12979148;rs7249692;rs5754422;rs464161;rs131654	59:63
ENSG00000121310	ECHDC2	1	53361656	53392884	-1	protein_coding	55268	ECHDC2	1.18082e-07	0.192219	0	0	1	7.634e-06	0.0466232	eQTLGen_trans_eQTLs	NA	No	NA	1.964e-07	rs55931203	54
ENSG00000116133	DHCR24	1	55315306	55352891	-1	protein_coding	1718	DHCR24	0.969137	0.120325	0	0	37	5.1826e-15	0	eQTLGen_trans_eQTLs	NA	No	NA	4.48e-14	rs174547;rs651821;rs180326;rs11604424	1 day, 15:44:00
ENSG00000177606	JUN	1	59246465	59249785	-1	protein_coding	3725	JUN	0.460852	-1.30268	0	0	6	7.3827e-08	0.000924809	eQTLGen_trans_eQTLs	NA	No	NA	NA	rs3858704	45
ENSG00000134709	HOOK1	1	60280458	60342050	1	protein_coding	51361	HOOK1	4.1567e-05	-0.0627975	0	0	2	8.1225e-07	0.00687662	eQTLGen_trans_eQTLs	NA	Yes	Left_Ventricle:Mesenchymal_Stem_Cell	2.719e-19	rs3858704;rs6661669;rs56115463:rs6661669:rs2182869:rs6661669;rs2182869;rs56115463:rs6661669;rs2182869:rs56115463:rs12749263	02:45:00
ENSG00000132849	INADL	1	62208149	62629592	1	protein_coding	10207	INADL	6.18135e-26	0.297697	0	0	60	6.824e-09	0.000134363	eQTLGen_trans_eQTLs:GTEx/v8/Colon_Transverse	NA	No	NA	0.001812	rs3858704;rs6661669;rs2182869;rs56115463	02:45:00
ENSG00000240563	L1TD1	1	62660503	62678000	1	protein_coding	54596	L1TD1	0.000340201	4.23611	0	0	1	5.48825e-05	0.049	DICE/T_CD8_naive	NA	No	NA	NA	rs56115463	2
ENSG00000132854	KANK4	1	62702651	62785085	-1	protein_coding	163782	KANK4	5.3985e-08	-0.458434	0	0	61	1.36413e-08	4.18663e-11	eQTLcatalogue/TwinsUK_ge_fat:PsychENCODE_eQTLs:CMC_SVA_cis:CMC_NoSVA_cis:GTEx/v8/Colon_Sigmoid:GTEx/v8/Esophagus_Gastroesophageal_Junction:GTEx/v8/Esophagus_Muscularis:GTEx/v8/Nerve_Tibial:GTEx/v7/Colon_Sigmoid:GTEx/v7/Esophagus_Muscularis	NA	No	NA	2.719e-19	rs12749263;rs2182869;rs56115463;rs58583743;rs6661669	2
ENSG00000162607	USP1	1	62901968	62917475	1	protein_coding	7398	USP1	0.993181	-1.54208	55	18.26	390	5.8468e-58	0	PsychENCODE_eQTLs:eQTLGen_cis_eQTLs:BIOSQTL/BIOS_eQTL_geneLevel:GTEx/v8/Adipose_Subcutaneous:GTEx/v8/Adrenal_Gland:GTEx/v8/Whole_Blood:GTEx/v8/Artery_Tibial:GTEx/v8/Esophagus_Mucosa:GTEx/v8/Esophagus_Muscularis:GTEx/v8/Muscle_Skeletal:GTEx/v8/Nerve_Tibial:GTEx/v8/Thyroid:GTEx/v7/Adrenal_Gland:GTEx/v7/Esophagus_Muscularis:GTEx/v7/Heart_Left_Ventricle:GTEx/v7/Muscle_Skeletal	NA	Yes	Promoter_anchored_loops:IMR90:Mesenchymal_Stem_Cell:Mesendoderm:Trophoblast-like_Cell:hESC	4.803e-25	rs56115463;rs12749263;rs6661669;rs2182869;rs58583743;rs58583743:rs6661669;rs56115463:rs6661669;rs56115463:rs2182869:rs56115463:rs6661669:rs6661669;rs2182869:rs12749263:rs58583743	2
ENSG00000116641	DOCK7	1	62920399	63153969	-1	protein_coding	85440	DOCK7	0.771361	NA	304	18.64	484	6.2483e-202	0	TIGER/Nom_Alonso_Pancreatic_islets:Nom_InsPIRE_Islets_Gene_eQTLs_Nominal_Pvalues:EyeGEx:eQTLcatalogue/Alasoo_2018_ge_macrophage_Salmonella:eQTLcatalogue/BLUEPRINT_ge_monocyte:eQTLcatalogue/BLUEPRINT_ge_T-cell:eQTLcatalogue/CEDAR_B-cell_CD19:eQTLcatalogue/CEDAR_monocyte_CD14:eQTLcatalogue/Fairfax_2014_IFN24:eQTLcatalogue/Fairfax_2014_LPS24:eQTLcatalogue/Fairfax_2014_LPS2:eQTLcatalogue/Fairfax_2014…	NA	Yes	Adult_Cortex:IMR90:Mesenchymal_Stem_Cell:Mesendoderm	4.803e-25	rs6661669;rs56115463;rs2182869;rs12749263;rs58583743;rs6661669:rs6661669;rs56115463:rs56115463:rs2182869:rs6661669;rs58583743:rs6661669;rs56115463:rs12749263:rs6661669	2
ENSG00000132855	ANGPTL3	1	63063158	63071830	1	protein_coding	27329	ANGPTL3	2.12016e-07	-0.803837	15	12.12	84	1.16254e-07	0.00164655	GTEx/v8/Liver:GTEx/v7/Liver	NA	Yes	Left_Ventricle:Liver:IMR90:Mesenchymal_Stem_Cell:Mesendoderm:Trophoblast-like_Cell:hESC	4.803e-25	rs6661669;rs2182869;rs56115463;rs58583743;rs56115463:rs6661669;rs56115463:rs2182869:rs56115463:rs6661669:rs6661669;rs2182869:rs12749263:rs6661669;rs58583743:rs6661669;rs12749263:rs6661669;rs58583743:rs56115463;rs12749263:rs2182869;rs58583743:rs58583743	2
ENSG00000269624	AL138847.1	1	63073437	63075249	1	protein_coding	NA	NA	NA	NA	10	12.12	136	2.4922e-05	0.00247431	PsychENCODE_eQTLs	NA	Yes	Left_Ventricle:Liver:IMR90:Mesenchymal_Stem_Cell:Mesendoderm:Trophoblast-like_Cell:hESC	4.803e-25	rs6661669;rs2182869;rs56115463;rs56115463:rs6661669;rs56115463:rs2182869:rs56115463:rs6661669:rs6661669;rs2182869:rs12749263:rs6661669;rs58583743:rs6661669;rs12749263:rs6661669;rs58583743:rs56115463;rs12749263:rs2182869;rs58583743:rs58583743	2
ENSG00000125703	ATG4C	1	63249806	63331184	1	protein_coding	84938	ATG4C	3.32762e-09	-0.809377	87	15.08	429	8.889e-119	0	TIGER/Nom_Alonso_Pancreatic_islets:EyeGEx:eQTLcatalogue/Alasoo_2018_ge_macrophage_Salmonella:eQTLcatalogue/CEDAR_T-cell_CD4:eQTLcatalogue/Fairfax_2014_LPS24:eQTLcatalogue/Fairfax_2014_naive:eQTLcatalogue/Lepik_2017_ge_blood:eQTLcatalogue/Quach_2016_ge_monocyte_LPS:eQTLcatalogue/Quach_2016_ge_monocyte_naive:eQTLcatalogue/Quach_2016_ge_monocyte_Pam3CSK4:eQTLcatalogue/Quach_2016_ge_monocyte_R848:eQT…	NA	Yes	Promoter_anchored_loops:Liver:GM12878:IMR90:Mesenchymal_Stem_Cell:Mesendoderm:hESC	4.803e-25	rs2182869;rs58583743;rs6661669;rs12749263;rs56115463;rs12749263:rs6661669;rs56115463:rs6661669:rs12749263:rs6661669;rs56115463:rs2182869:rs56115463:rs56115463;rs2182869:rs58583743:rs6661669	2
ENSG00000187140	FOXD3	1	63788730	63790797	1	protein_coding	27022	FOXD3	NA	-0.433106	0	0	6	3.84362e-06	0.0065488	GTEx/v7/Nerve_Tibial	NA	Yes	IMR90	6.963e-09	rs12749263;rs58583743	2
ENSG00000088035	ALG6	1	63833261	63904233	1	protein_coding	29929	ALG6	0.0553676	-0.307103	0	0	1	8.31053e-05	0.0142758	GTEx/v8/Breast_Mammary_Tissue	NA	Yes	IMR90:Mesenchymal_Stem_Cell:Mesendoderm:hESC	6.098e-11	rs2182869;rs58583743:rs6661669;rs58583743:rs6661669:rs12749263:rs2182869;rs58583743	2
ENSG00000142856	ITGB3BP	1	63906441	64059392	-1	protein_coding	23421	ITGB3BP	1.47054e-05	-0.391813	0	0	9	0.000350616	0.0165951	BRAINEAC/OCTX:BRAINEAC/TCTX	NA	Yes	Mesendoderm:hESC	6.963e-09	rs12749263;rs6661669;rs56115463;rs58583743	2
ENSG00000079739	PGM1	1	64058947	64125916	1	protein_coding	5236	PGM1	9.9614e-06	1.20318	0	0	1	2.12463e-05	0.0117514	GTEx/v8/Adrenal_Gland	NA	Yes	Mesendoderm:hESC	7.925e-06	rs6661669;rs58583743	2
ENSG00000162434	JAK1	1	65298912	65432187	-1	protein_coding	3716	JAK1	0.99591	-0.642049	0	0	1	NA	0.049	CMC_SVA_cis	NA	Yes	Promoter_anchored_loops	5.947e-06	rs1392816;rs1392816:rs6588183	3
ENSG00000116675	DNAJC6	1	65713902	65881552	1	protein_coding	9829	DNAJC6	0.999188	-0.584518	0	0	23	6.8919e-06	0.0208413	BRAINEAC/HIPP:GTEx/v7/Brain_Frontal_Cortex_BA9:GTEx/v6/Adrenal_Gland	NA	Yes	IMR90:Mesenchymal_Stem_Cell:Mesendoderm	1.138e-08	rs6588183;rs1392816;rs6588183:rs1392816:rs6588183;rs1392816:rs58583743	02:03:00
ENSG00000116678	LEPR	1	65886248	66107242	1	protein_coding	54741	LEPR	0.999805	0.927492	0	0	50	2.8438e-19	0	eQTLGen_cis_eQTLs	NA	Yes	Mesendoderm	3.977e-08	rs1392816;rs6588183;rs6588183:rs1392816	3
ENSG00000213625	LEPROT	1	65886270	65901690	1	protein_coding	54741	LEPROT	0.0947894	1.26654	0	0	83	2.0599e-46	0	eQTLcatalogue/Fairfax_2014_IFN24:eQTLGen_cis_eQTLs	NA	Yes	Mesendoderm	1.138e-08	rs1392816;rs6588183;rs6588183:rs1392816	3
ENSG00000184588	PDE4B	1	66258197	66840259	1	protein_coding	5142	PDE4B	0.709079	-0.830512	114	16.47	2	6.53966e-05	0.0144337	EyeGEx:GTEx/v8/Stomach	NA	Yes	IMR90:Mesenchymal_Stem_Cell:Mesendoderm:hESC	1.138e-08	rs6588183;rs1392816;rs6588183:rs1392816:rs6588183	3
ENSG00000118473	SGIP1	1	66999066	67213982	1	protein_coding	84251	SGIP1	0.999651	-0.315319	0	0	3	2.62531e-05	0.0407042	BRAINEAC/FCTX:BRAINEAC/aveALL	NA	Yes	Left_Ventricle:Mesendoderm:hESC	1.138e-08	rs1392816;rs6588183:rs1392816:rs6588183	3
ENSG00000248458	AL139147.1	1	67131547	67142710	-1	protein_coding	NA	NA	NA	NA	0	0	9	1.81002e-05	0.0194006	GTEx/v7/Lung	NA	Yes	Left_Ventricle:Mesendoderm:hESC	1.138e-08	rs6588183;rs1392816:rs6588183:rs6588183;rs1392816	3
ENSG00000152760	TCTEX1D1	1	67218142	67244470	1	protein_coding	200132	TCTEX1D1	0.00642468	-0.383983	0	0	2	0.000803677	0.0485732	PsychENCODE_eQTLs	NA	Yes	Left_Ventricle:Mesenchymal_Stem_Cell:Mesendoderm:hESC	1.138e-08	rs6588183;rs6588183:rs1392816:rs6588183;rs1392816	3
ENSG00000152763	WDR78	1	67278568	67390570	-1	protein_coding	79819	WDR78	7.87926e-11	-0.824643	0	0	1	7.50156e-06	0.0375078	eQTLcatalogue/CEDAR_neutrophil_CD15	NA	No	NA	NA	rs6588183	3
ENSG00000081985	IL12RB2	1	67773047	67862583	1	protein_coding	3595	IL12RB2	4.50999e-06	-0.052496	0	0	1	4.3902e-06	0.0295985	eQTLGen_trans_eQTLs	NA	No	NA	NA	rs3858704	45
ENSG00000172260	NEGR1	1	71861623	72748417	-1	protein_coding	257194	NEGR1	0.951349	-1.71358	270	18.43	452	3.7945e-215	0	EyeGEx:eQTLcatalogue/BLUEPRINT_ge_monocyte:eQTLcatalogue/GENCORD_ge_T-cell:eQTLcatalogue/HipSci_ge_iPSC:PsychENCODE_eQTLs:DICE/Monocyte_classical:DICE/Monocyte_non_classical:eQTLGen_cis_eQTLs:BIOSQTL/BIOS_eQTL_geneLevel:xQTLServer_eQTLs:CMC_SVA_cis:BRAINEAC/WHMT:GTEx/v8/Adipose_Visceral_Omentum:GTEx/v8/Brain_Caudate_basal_ganglia:GTEx/v8/Brain_Nucleus_accumbens_basal_ganglia:GTEx/v8/Brain_Putamen…	NA	Yes	EP_correlation_organ_oneway:Aorta:Left_Ventricle:Liver:Right_Ventricle:GM12878:IMR90:Mesenchymal_Stem_Cell:Mesendoderm:Neural_Progenitor_Cell:Trophoblast-like_Cell:hESC	2.252e-18	rs2821239;rs12137231;rs2815749;rs12748679;rs7531118;rs782239;rs7543826;rs12137231:rs2821239:rs2815749;rs12748679:rs7531118;rs2821239:rs12748679:rs12748679;rs12137231:rs782239;rs2821239:rs2815749:rs2821239;rs12137231:rs12748679;rs12137231:rs2815749;rs2821239:rs7531118:rs7543826:rs7543826;rs782239:rs782239:rs2815749;rs782239:rs12748679	4
ENSG00000154027	AK5	1	77747736	78025651	1	protein_coding	26289	AK5	0.139499	1.00096	0	0	8	1.9062e-14	0	eQTLGen_trans_eQTLs	NA	No	NA	0.003258	rs3858704	45
ENSG00000137959	IFI44L	1	79085607	79111830	1	protein_coding	10964	IFI44L	2.21842e-10	0.480156	0	0	2	2.6375e-06	0.0194541	eQTLGen_trans_eQTLs	NA	No	NA	NA	rs3858704	45
ENSG00000055732	MCOLN3	1	85483765	85514182	-1	protein_coding	55283	MCOLN3	3.77974e-07	0.339539	0	0	5	1.1869e-08	0.00017477	eQTLGen_trans_eQTLs	NA	No	NA	NA	rs3858704	45
ENSG00000097033	SH3GLB1	1	87170259	87213867	1	protein_coding	51100	SH3GLB1	0.730421	NA	0	0	3	4.6505e-07	0.00411695	eQTLGen_trans_eQTLs	NA	No	NA	NA	rs3858704	45
ENSG00000117228	GBP1	1	89518002	89531043	-1	protein_coding	2633	GBP1	1.80843e-12	0.869246	0	0	10	1.8017e-56	0	eQTLGen_trans_eQTLs	NA	No	NA	0.003258	rs3858704	45
ENSG00000162645	GBP2	1	89571815	89616139	-1	protein_coding	2634	GBP2	1.96949e-05	-0.409539	0	0	10	1.2254e-49	0	eQTLGen_trans_eQTLs	NA	No	NA	0.003258	rs3858704	45
ENSG00000154451	GBP5	1	89724633	89738544	-1	protein_coding	115362	GBP5	7.95482e-06	-0.471207	0	0	12	7.6737e-57	0	eQTLGen_trans_eQTLs	NA	No	NA	1.572e-11	rs2078847;rs2040571;rs3858704	45
ENSG00000172031	EPHX4	1	92495539	92529093	1	protein_coding	253152	EPHX4	0.0335439	NA	0	0	3	NA	0.049	CMC_SVA_cis	NA	No	NA	0.005178	rs61799470	5
ENSG00000122484	RPAP2	1	92764522	92867613	1	protein_coding	79871	RPAP2	0.00208553	-0.400426	0	0	4	3.4942e-06	0.0100881	eQTLGen_cis_eQTLs	NA	Yes	Left_Ventricle:Mesenchymal_Stem_Cell	4.507e-10	rs6697683;rs6697683:rs61799470	5
ENSG00000067208	EVI5	1	92974253	93257961	-1	protein_coding	7813	EVI5	2.33072e-06	0.95327	0	0	128	1.68286e-06	7.01596e-16	eQTLGen_cis_eQTLs:GTEx/v8/Whole_Blood:GTEx/v8/Breast_Mammary_Tissue:GTEx/v8/Cells_Cultured_fibroblasts	NA	No	NA	2.831e-11	rs6697683;rs61799470	5
ENSG00000154511	FAM69A	1	93307724	93427057	-1	protein_coding	388650	FAM69A	0.0908652	-0.0598451	0	0	109	5.935e-12	0	eQTLGen_cis_eQTLs:BIOSQTL/BIOS_eQTL_geneLevel:GTEx/v8/Esophagus_Muscularis:GTEx/v8/Thyroid:GTEx/v7/Artery_Tibial:GTEx/v7/Nerve_Tibial:GTEx/v7/Thyroid:GTEx/v6/Nerve_Tibial:GTEx/v6/Thyroid	NA	Yes	GM12878:IMR90:Mesenchymal_Stem_Cell:Mesendoderm:Trophoblast-like_Cell:hESC	2.831e-11	rs61799470;rs6697683;rs61799470:rs6697683:rs6697683	5
ENSG00000143033	MTF2	1	93544792	93604638	1	protein_coding	22823	MTF2	0.9946	-1.11207	46	15.13	4	9.7463e-12	0	eQTLGen_cis_eQTLs:GTEx/v8/Pancreas	NA	Yes	Aorta:Left_Ventricle:Liver:GM12878:IMR90:Mesenchymal_Stem_Cell:Mesendoderm:Trophoblast-like_Cell:hESC	2.831e-11	rs6697683;rs61799470;rs61799470:rs6697683	5
ENSG00000117500	TMED5	1	93615299	93646285	-1	protein_coding	50999	TMED5	0.00243713	-1.50574	59	25	436	3.27170000000001e-310	0	EyeGEx:eQTLcatalogue/Alasoo_2018_ge_macrophage_IFNg_Salmonella:eQTLcatalogue/Alasoo_2018_ge_macrophage_IFNg:eQTLcatalogue/BLUEPRINT_ge_neutrophil:eQTLcatalogue/BLUEPRINT_ge_T-cell:eQTLcatalogue/CEDAR_B-cell_CD19:eQTLcatalogue/CEDAR_monocyte_CD14:eQTLcatalogue/CEDAR_neutrophil_CD15:eQTLcatalogue/CEDAR_rectum:eQTLcatalogue/CEDAR_T-cell_CD4:eQTLcatalogue/CEDAR_T-cell_CD8:eQTLcatalogue/Fairfax_2012_B…	NA	Yes	Fetal_Cortex:Aorta:Left_Ventricle:Liver:GM12878:IMR90:Mesenchymal_Stem_Cell:Mesendoderm:Trophoblast-like_Cell:hESC	2.831e-11	rs6697683;rs61799470;rs6697683:rs6697683;rs61799470:rs61799470	5
ENSG00000122483	CCDC18	1	93645476	93744287	1	protein_coding	343099	CCDC18	NA	NA	163	23.3	417	3.18149e-127	0	EyeGEx:eQTLcatalogue/BLUEPRINT_ge_monocyte:eQTLcatalogue/BLUEPRINT_ge_neutrophil:eQTLcatalogue/BLUEPRINT_ge_T-cell:eQTLcatalogue/BrainSeq_ge_brain:eQTLcatalogue/GENCORD_ge_T-cell:eQTLcatalogue/Lepik_2017_ge_blood:eQTLcatalogue/Nedelec_2016_ge_macrophage_naive:eQTLcatalogue/TwinsUK_ge_fat:eQTLcatalogue/TwinsUK_ge_LCL:PsychENCODE_eQTLs:DICE/B_cell_naive:DICE/T_CD4_naive:DICE/Monocyte_classical:DICE…	NA	Yes	EP_correlation_cell_type_oneway:Fetal_Cortex:Aorta:Left_Ventricle:Liver:GM12878:IMR90:Mesenchymal_Stem_Cell:Mesendoderm:Trophoblast-like_Cell:hESC	2.831e-11	rs6697683;rs61799470;rs6697683:rs6697683;rs61799470:rs61799470	5
ENSG00000117505	DR1	1	93811445	93835055	1	protein_coding	1810	DR1	0.835492	0.0802393	48	15.93	447	3.27170000000001e-310	0	TIGER/Nom_Alonso_Pancreatic_islets:Nom_InsPIRE_Islets_Gene_eQTLs_Nominal_Pvalues:EyeGEx:eQTLcatalogue/Alasoo_2018_ge_macrophage_IFNg:eQTLcatalogue/Alasoo_2018_ge_macrophage_naive:eQTLcatalogue/Alasoo_2018_ge_macrophage_Salmonella:eQTLcatalogue/BLUEPRINT_ge_monocyte:eQTLcatalogue/BLUEPRINT_ge_neutrophil:eQTLcatalogue/BLUEPRINT_ge_T-cell:eQTLcatalogue/CEDAR_monocyte_CD14:eQTLcatalogue/CEDAR_neutrop…	NA	Yes	Aorta:Liver:GM12878:IMR90:Mesenchymal_Stem_Cell:Mesendoderm:Trophoblast-like_Cell:hESC	2.831e-11	rs6697683;rs61799470;rs6697683:rs6697683;rs61799470:rs61799470	5
ENSG00000137942	FNBP1L	1	93913688	94020218	1	protein_coding	54874	FNBP1L	0.965505	-1.29233	47	16.73	308	2.9734e-96	0	EyeGEx:eQTLcatalogue/BLUEPRINT_ge_T-cell:eQTLcatalogue/Fairfax_2014_LPS24:eQTLcatalogue/Fairfax_2014_LPS2:eQTLcatalogue/Lepik_2017_ge_blood:eQTLcatalogue/Nedelec_2016_ge_macrophage_Salmonella:PsychENCODE_eQTLs:DICE/T_CD4_naive_activated:DICE/T_CD8_naive:DICE/T_CD8_naive_activated:eQTLGen_cis_eQTLs:BIOSQTL/BIOS_eQTL_geneLevel:GTEx/v8/Whole_Blood:GTEx/v8/Artery_Aorta:GTEx/v8/Artery_Tibial:GTEx/v8/B…	NA	Yes	Left_Ventricle:Liver:IMR90:Mesenchymal_Stem_Cell:Mesendoderm:Trophoblast-like_Cell:hESC	2.831e-11	rs61799470;rs6697683;rs6697683:rs61799470:rs6697683	5
ENSG00000137936	BCAR3	1	94027347	94312706	-1	protein_coding	8412	BCAR3	0.91678	-0.636257	0	0	88	1.0642e-07	5.99815e-16	PsychENCODE_eQTLs:eQTLGen_cis_eQTLs:CMC_SVA_cis:GTEx/v8/Artery_Aorta:GTEx/v8/Artery_Tibial:GTEx/v8/Muscle_Skeletal:GTEx/v8/Cells_Cultured_fibroblasts:GTEx/v8/Skin_Not_Sun_Exposed_Suprapubic	NA	Yes	Promoter_anchored_loops:Left_Ventricle:Liver:Right_Ventricle:GM12878:IMR90:Mesenchymal_Stem_Cell:Mesendoderm:Trophoblast-like_Cell:hESC	2.831e-11	rs6697683;rs61799470;rs6697683:rs6697683;rs61799470:rs61799470	5
ENSG00000067334	DNTTIP2	1	94333373	94345474	-1	protein_coding	30836	DNTTIP2	0.000217904	0.993302	0	0	1	NA	0.049	CMC_SVA_cis	NA	Yes	Left_Ventricle:Liver:IMR90:Mesenchymal_Stem_Cell:Mesendoderm:Trophoblast-like_Cell:hESC	2.831e-11	rs6697683;rs6697683:rs6697683;rs61799470:rs61799470	5
ENSG00000023909	GCLM	1	94350761	94374966	-1	protein_coding	2730	GCLM	0.414918	1.34247	0	0	21	9.34104e-06	6.88633e-16	PsychENCODE_eQTLs:CMC_SVA_cis:GTEx/v8/Cells_Cultured_fibroblasts:GTEx/v6/Cells_Transformed_fibroblasts	NA	Yes	Promoter_anchored_loops:Aorta:Left_Ventricle:Liver:IMR90:Mesenchymal_Stem_Cell:Mesendoderm:Trophoblast-like_Cell:hESC	2.831e-11	rs6697683;rs61799470:rs6697683:rs61799470	5
ENSG00000137962	ARHGAP29	1	94614544	94740624	-1	protein_coding	9411	ARHGAP29	0.999987	-0.240387	0	0	11	5.31487e-06	0.0267642	GTEx/v8/Minor_Salivary_Gland	NA	Yes	Left_Ventricle:IMR90:Mesenchymal_Stem_Cell:Mesendoderm	2.831e-11	rs6697683;rs61799470;rs6697683:rs61799470:rs6697683	5
ENSG00000188641	DPYD	1	97543299	98386605	-1	protein_coding	1806	DPYD	4.18972e-09	0.587602	0	0	7	1.0216e-09	3.95257e-05	eQTLGen_trans_eQTLs	NA	No	NA	0.003258	rs3858704	45
ENSG00000162636	FAM102B	1	109102711	109187522	1	protein_coding	284611	FAM102B	0.0479308	-0.937207	0	0	7	5.5961e-09	0.000119495	eQTLGen_trans_eQTLs	NA	Yes	GM12878:IMR90:Mesenchymal_Stem_Cell:Mesendoderm:Trophoblast-like_Cell:hESC	0.003258	rs3858704;rs11101986	06:45:00
ENSG00000143107	FNDC7	1	109255279	109285365	1	protein_coding	163479	FNDC7	0.000318365	-0.454974	1	0.007	0	NA	NA	NA	NA	No	NA	NA	rs11101986	6
ENSG00000116266	STXBP3	1	109289296	109352148	1	protein_coding	6814	STXBP3	7.39664e-06	-0.348222	0	0	1	1.99981e-17	1.00781e-14	EyeGEx	NA	Yes	IMR90:Mesenchymal_Stem_Cell:Mesendoderm:Trophoblast-like_Cell:hESC	NA	rs11101986	6
ENSG00000197780	TAF13	1	109605108	109618624	-1	protein_coding	6884	TAF13	0.0198502	0.249429	0	0	3	NA	0.049	CMC_NoSVA_cis	NA	Yes	IMR90	0.01172	rs11101986	6
ENSG00000215717	TMEM167B	1	109632425	109639556	1	protein_coding	56900	TMEM167B	0.632477	-0.0383717	0	0	1	1.1997e-12	0	eQTLGen_cis_eQTLs:BIOSQTL/BIOS_eQTL_geneLevel	NA	Yes	Adult_Cortex:IMR90	NA	rs11101986	6
ENSG00000179902	C1orf194	1	109648573	109656479	-1	protein_coding	127003	C1orf194	2.5003e-07	NA	0	0	2	8.1502e-06	0.00560231	BIOSQTL/BIOS_eQTL_geneLevel	NA	Yes	IMR90:Mesenchymal_Stem_Cell:Mesendoderm	0.00045	rs11101986	6
ENSG00000116299	KIAA1324	1	109656301	109749401	1	protein_coding	57535	KIAA1324	2.14865e-08	NA	1	1.03	26	1.8117e-271	0	eQTLcatalogue/CEDAR_neutrophil_CD15:eQTLcatalogue/Lepik_2017_ge_blood:eQTLGen_cis_eQTLs:BIOSQTL/BIOS_eQTL_geneLevel:CMC_SVA_cis:GTEx/v8/Thyroid:GTEx/v7/Thyroid	NA	Yes	IMR90:Mesenchymal_Stem_Cell:Mesendoderm	9.283e-09	rs11101986	6
ENSG00000031698	SARS	1	109756540	109780791	1	protein_coding	6301	SARS	0.999151	-0.332038	0	0	4	1.9355e-17	0	eQTLcatalogue/BLUEPRINT_ge_neutrophil:eQTLGen_cis_eQTLs:GTEx/v8/Skin_Not_Sun_Exposed_Suprapubic	NA	Yes	Adult_Cortex:Fetal_Cortex	7.636e-05	rs11101986	6
ENSG00000143126	CELSR2	1	109792641	109818372	1	protein_coding	1952	CELSR2	0.999999	0.807304	2	1.731	7	2.06187e-20	1.2613e-66	TIGER/Nom_Alonso_Pancreatic_islets:eQTLcatalogue/Lepik_2017_ge_blood:PsychENCODE_eQTLs:eQTLGen_cis_eQTLs:BIOSQTL/BIOS_eQTL_geneLevel:xQTLServer_eQTLs:GTEx/v8/Esophagus_Mucosa:GTEx/v8/Liver:GTEx/v8/Muscle_Skeletal:GTEx/v8/Pancreas:GTEx/v8/Skin_Not_Sun_Exposed_Suprapubic:GTEx/v8/Skin_Sun_Exposed_Lower_leg:GTEx/v7/Esophagus_Mucosa:GTEx/v7/Liver:GTEx/v7/Muscle_Skeletal:GTEx/v6/Esophagus_Mucosa:GTEx/v…	NA	Yes	Promoter_anchored_loops:Fetal_Cortex:Spleen:IMR90:Mesenchymal_Stem_Cell:Mesendoderm:Trophoblast-like_Cell:hESC	7.636e-05	rs11101986	6
ENSG00000134222	PSRC1	1	109822178	109825808	-1	protein_coding	84722	PSRC1	1.74718e-06	-0.20888	2	1.731	20	2.7406e-275	0	TIGER/Nom_Alonso_Pancreatic_islets:eQTLcatalogue/BLUEPRINT_ge_monocyte:eQTLcatalogue/CEDAR_neutrophil_CD15:eQTLcatalogue/Fairfax_2014_IFN24:eQTLcatalogue/Fairfax_2014_naive:eQTLcatalogue/Lepik_2017_ge_blood:PsychENCODE_eQTLs:eQTLGen_cis_eQTLs:BIOSQTL/BIOS_eQTL_geneLevel:CMC_SVA_cis:GTEx/v8/Adipose_Subcutaneous:GTEx/v8/Adipose_Visceral_Omentum:GTEx/v8/Whole_Blood:GTEx/v8/Artery_Aorta:GTEx/v8/Arter…	NA	No	NA	9.283e-09	rs11101986	6
ENSG00000221986	MYBPHL	1	109834987	109849663	-1	protein_coding	343263	MYBPHL	0.00461844	0.281706	1	0.705	3	8.03306e-05	1.42006e-53	TIGER/Nom_Alonso_Pancreatic_islets:GTEx/v8/Testis	NA	No	NA	7.636e-05	rs11101986	6
ENSG00000134243	SORT1	1	109852192	109940573	-1	protein_coding	6272	SORT1	0.999927	-1.34619	0	0	14	5.071e-15	0	TIGER/Nom_Alonso_Pancreatic_islets:eQTLGen_cis_eQTLs:eQTLGen_trans_eQTLs:BIOSQTL/BIOS_eQTL_geneLevel:GTEx/v8/Liver:GTEx/v7/Liver:GTEx/v6/Liver	NA	Yes	Promoter_anchored_loops:Adult_Cortex:Fetal_Cortex:Spleen:GM12878:IMR90:Mesenchymal_Stem_Cell:Mesendoderm:Trophoblast-like_Cell:hESC	0.003258	rs11101986;rs3858704	06:45:00
ENSG00000143028	SYPL2	1	110009180	110024759	1	protein_coding	284612	SYPL2	0.0167711	0.437866	0	0	13	7.04084e-07	3.81633e-110	GTEx/v8/Adipose_Subcutaneous:GTEx/v8/Artery_Coronary:GTEx/v8/Liver:GTEx/v8/Nerve_Tibial:GTEx/v8/Cells_Cultured_fibroblasts:GTEx/v8/Testis:GTEx/v7/Adipose_Subcutaneous	NA	Yes	Adult_Cortex:Fetal_Cortex:Left_Ventricle:GM12878:IMR90:Mesenchymal_Stem_Cell:Mesendoderm:Trophoblast-like_Cell	9.283e-09	rs11101986	6
ENSG00000162650	ATXN7L2	1	110026101	110035426	1	protein_coding	127002	ATXN7L2	0.718955	NA	0	0	3	7.59003e-07	5.34013e-43	GTEx/v8/Artery_Tibial:GTEx/v8/Liver:GTEx/v8/Testis:GTEx/v7/Artery_Tibial	NA	Yes	Adult_Cortex:Fetal_Cortex:Left_Ventricle:GM12878:IMR90:Mesenchymal_Stem_Cell:Mesendoderm:Trophoblast-like_Cell	9.283e-09	rs11101986	6
ENSG00000174151	CYB561D1	1	110036674	110045554	1	protein_coding	284613	CYB561D1	0.0158304	-0.395994	0	0	1	2.18009e-05	0.0138322	BIOSQTL/BIOS_eQTL_geneLevel	NA	Yes	Adult_Cortex:Fetal_Cortex:Left_Ventricle:GM12878:IMR90:Mesenchymal_Stem_Cell:Mesendoderm:Trophoblast-like_Cell	9.283e-09	rs11101986	6
ENSG00000181754	AMIGO1	1	110046797	110052360	-1	protein_coding	57463	AMIGO1	0.888493	-0.212526	0	0	17	2.6876e-39	0	TIGER/Nom_Alonso_Pancreatic_islets:EyeGEx:eQTLcatalogue/Alasoo_2018_ge_macrophage_naive:eQTLcatalogue/GENCORD_ge_fibroblast:eQTLcatalogue/GEUVADIS_ge_LCL:eQTLcatalogue/HipSci_ge_iPSC:eQTLcatalogue/Lepik_2017_ge_blood:eQTLcatalogue/TwinsUK_ge_fat:eQTLcatalogue/TwinsUK_ge_skin:DICE/B_cell_naive:DICE/Monocyte_classical:DICE/NK:eQTLGen_cis_eQTLs:BIOSQTL/BIOS_eQTL_geneLevel:GTEx/v8/Adipose_Subcutaneou…	NA	Yes	Promoter_anchored_loops:IMR90:Mesenchymal_Stem_Cell	3.19e-07	rs11101986	6
ENSG00000156097	GPR61	1	110082494	110091028	1	protein_coding	83873	GPR61	0.801489	-0.58687	0	0	1	0.0001532	0.0123548	TIGER/Nom_Alonso_Pancreatic_islets	NA	Yes	Promoter_anchored_loops:Adult_Cortex:Fetal_Cortex:Left_Ventricle:GM12878:IMR90:Mesenchymal_Stem_Cell:Mesendoderm:Trophoblast-like_Cell:hESC	9.283e-09	rs11101986	6
ENSG00000065135	GNAI3	1	110091233	110136975	1	protein_coding	2773	GNAI3	0.0388113	0.458884	1	9.533	21	9.5424e-50	0	eQTLcatalogue/Fairfax_2014_naive:eQTLGen_cis_eQTLs:GTEx/v8/Esophagus_Muscularis	NA	Yes	Promoter_anchored_loops:Left_Ventricle:GM12878:IMR90:Mesenchymal_Stem_Cell:Mesendoderm:Trophoblast-like_Cell:hESC	9.283e-09	rs11101986	6
ENSG00000134183	GNAT2	1	110145889	110155679	-1	protein_coding	2780	GNAT2	0.00815865	-0.0928283	1	9.533	5	1.2649e-18	0	EyeGEx:eQTLGen_cis_eQTLs	NA	Yes	IMR90:Mesenchymal_Stem_Cell	3.19e-07	rs11101986	6
ENSG00000116337	AMPD2	1	110158726	110174673	1	protein_coding	271	AMPD2	0.0085425	-0.430988	1	5.358	8	9.23748e-06	0.000385194	GTEx/v8/Brain_Putamen_basal_ganglia:GTEx/v8/Skin_Sun_Exposed_Lower_leg:GTEx/v7/Skin_Sun_Exposed_Lower_leg	NA	Yes	IMR90:Mesenchymal_Stem_Cell	1.869e-06	rs11101986	6
ENSG00000168765	GSTM4	1	110198703	110208118	1	protein_coding	2948	GSTM4	0.000917345	0.373952	10	10.44	73	3.27170000000001e-310	0	TIGER/Nom_Alonso_Pancreatic_islets:EyeGEx:eQTLcatalogue/Alasoo_2018_ge_macrophage_IFNg_Salmonella:eQTLcatalogue/Alasoo_2018_ge_macrophage_IFNg:eQTLcatalogue/Alasoo_2018_ge_macrophage_naive:eQTLcatalogue/Alasoo_2018_ge_macrophage_Salmonella:eQTLcatalogue/BLUEPRINT_ge_monocyte:eQTLcatalogue/BLUEPRINT_ge_T-cell:eQTLcatalogue/CEDAR_B-cell_CD19:eQTLcatalogue/CEDAR_ileum:eQTLcatalogue/CEDAR_monocyte_CD…	NA	Yes	Adult_Cortex:Fetal_Cortex:Left_Ventricle:IMR90:Mesenchymal_Stem_Cell:Mesendoderm:Trophoblast-like_Cell:hESC	9.283e-09	rs11101986	6
ENSG00000213366	GSTM2	1	110210644	110252171	1	protein_coding	2946	GSTM2	0.008902	-0.190008	42	12.14	67	0	0	EyeGEx:eQTLcatalogue/Alasoo_2018_ge_macrophage_IFNg:eQTLcatalogue/BLUEPRINT_ge_monocyte:eQTLcatalogue/BLUEPRINT_ge_T-cell:eQTLcatalogue/BrainSeq_ge_brain:eQTLcatalogue/GENCORD_ge_LCL:eQTLcatalogue/GENCORD_ge_T-cell:eQTLcatalogue/GEUVADIS_ge_LCL:eQTLcatalogue/HipSci_ge_iPSC:eQTLcatalogue/Lepik_2017_ge_blood:eQTLcatalogue/TwinsUK_ge_blood:eQTLcatalogue/TwinsUK_ge_fat:eQTLcatalogue/TwinsUK_ge_LCL:Ps…	NA	Yes	Promoter_anchored_loops	9.283e-09	rs11101986	6
ENSG00000134184	GSTM1	1	110230436	110251661	1	protein_coding	2944	GSTM1	0.345714	NA	31	12.14	74	3.27170000000001e-310	0	TIGER/Nom_Alonso_Pancreatic_islets:EyeGEx:eQTLcatalogue/Alasoo_2018_ge_macrophage_IFNg_Salmonella:eQTLcatalogue/Alasoo_2018_ge_macrophage_IFNg:eQTLcatalogue/Alasoo_2018_ge_macrophage_naive:eQTLcatalogue/Alasoo_2018_ge_macrophage_Salmonella:eQTLcatalogue/BLUEPRINT_ge_monocyte:eQTLcatalogue/BrainSeq_ge_brain:eQTLcatalogue/CEDAR_B-cell_CD19:eQTLcatalogue/CEDAR_ileum:eQTLcatalogue/CEDAR_monocyte_CD14…	NA	Yes	Promoter_anchored_loops	9.283e-09	rs11101986	6
ENSG00000134201	GSTM5	1	110254864	110318050	1	protein_coding	2949	GSTM5	0.000214167	-0.0457254	61	11.88	73	0	0	TIGER/Nom_Alonso_Pancreatic_islets:Nom_InsPIRE_Islets_Gene_eQTLs_Nominal_Pvalues:EyeGEx:eQTLcatalogue/BrainSeq_ge_brain:eQTLcatalogue/HipSci_ge_iPSC:eQTLcatalogue/Quach_2016_ge_monocyte_naive:eQTLcatalogue/TwinsUK_ge_fat:eQTLcatalogue/TwinsUK_ge_skin:PsychENCODE_eQTLs:DICE/T_CD8_naive:DICE/T_CD4_TH1_17:eQTLGen_cis_eQTLs:BIOSQTL/BIOS_eQTL_geneLevel:xQTLServer_eQTLs:CMC_SVA_cis:CMC_NoSVA_cis:BRAINE…	NA	Yes	Promoter_anchored_loops:Fetal_Cortex:Spleen:IMR90:Mesenchymal_Stem_Cell	9.283e-09	rs11101986	6
ENSG00000134202	GSTM3	1	110276554	110284384	-1	protein_coding	2947	GSTM3	0.000572589	0.168105	27	9.111	77	0	0	TIGER/Nom_Alonso_Pancreatic_islets:EyeGEx:eQTLcatalogue/Alasoo_2018_ge_macrophage_IFNg_Salmonella:eQTLcatalogue/Alasoo_2018_ge_macrophage_IFNg:eQTLcatalogue/Alasoo_2018_ge_macrophage_naive:eQTLcatalogue/Alasoo_2018_ge_macrophage_Salmonella:eQTLcatalogue/BLUEPRINT_ge_monocyte:eQTLcatalogue/BLUEPRINT_ge_T-cell:eQTLcatalogue/BrainSeq_ge_brain:eQTLcatalogue/CEDAR_ileum:eQTLcatalogue/CEDAR_platelet:eQ…	NA	Yes	Fetal_Cortex:Left_Ventricle:Spleen:IMR90:Mesenchymal_Stem_Cell:Mesendoderm:Trophoblast-like_Cell:hESC	9.283e-09	rs11101986	6
ENSG00000198758	EPS8L3	1	110292702	110306649	-1	protein_coding	79574	EPS8L3	0.000100217	0.325087	12	11.88	11	7.13367e-47	4.31187e-40	GTEx/v8/Heart_Left_Ventricle:GTEx/v8/Testis:GTEx/v7/Heart_Left_Ventricle:GTEx/v7/Testis:GTEx/v6/Testis	NA	Yes	Promoter_anchored_loops:Left_Ventricle:Spleen:IMR90:Mesenchymal_Stem_Cell:Mesendoderm:Trophoblast-like_Cell:hESC	9.283e-09	rs11101986	6
ENSG00000186150	UBL4B	1	110655062	110656569	1	protein_coding	164153	UBL4B	0.000847798	-0.19433	0	0	1	7.30913e-05	0.0465011	GTEx/v8/Cells_Cultured_fibroblasts	NA	No	NA	1.091e-05	rs11101986	6
ENSG00000197106	SLC6A17	1	110693108	110744824	1	protein_coding	101928619	SLC6A17	0.962735	0.0201642	1	2.371	0	NA	NA	NA	NA	No	NA	0.03869	rs11101986	6
ENSG00000116396	KCNC4	1	110753965	110825722	1	protein_coding	3749	KCNC4	0.000534225	-0.643366	1	2.371	0	NA	NA	NA	NA	No	NA	0.03869	rs11101986	6
ENSG00000162777	DENND2D	1	111729796	111747157	-1	protein_coding	79961	DENND2D	1.02695e-05	-0.159616	0	0	8	1.3057e-11	0	eQTLGen_trans_eQTLs	NA	No	NA	0.003258	rs3858704	45
ENSG00000197852	FAM212B	1	112223252	112298446	-1	protein_coding	101928718	FAM212B	0.00359052	0.902451	0	0	10	1.3878e-18	0	eQTLGen_trans_eQTLs	NA	No	NA	0.003258	rs3858704	45
ENSG00000081019	RSBN1	1	114304454	114355098	-1	protein_coding	54665	RSBN1	0.80514	-1.87091	0	0	5	1.3517e-08	0.000174326	eQTLGen_trans_eQTLs	NA	No	NA	NA	rs3858704	45
ENSG00000163349	HIPK1	1	114471814	114520426	1	protein_coding	204851	HIPK1	0.999943	-1.59247	0	0	1	5.1889e-06	0.0338743	eQTLGen_trans_eQTLs	NA	No	NA	NA	rs3858704	45
ENSG00000134198	TSPAN2	1	115590632	115632121	-1	protein_coding	10100	TSPAN2	0.000100587	1.13403	0	0	8	1.1587e-12	0	eQTLGen_trans_eQTLs	NA	No	NA	0.003258	rs3858704	45
ENSG00000116815	CD58	1	117057157	117113661	-1	protein_coding	965	CD58	0.299199	NA	0	0	5	1.8259e-06	0.0141396	eQTLGen_trans_eQTLs	NA	No	NA	NA	rs3858704	45
ENSG00000198019	FCGR1B	1	120926979	120935937	-1	protein_coding	100132417	FCGR1B	0.676509	-0.0478235	0	0	8	1.4727e-13	0	eQTLGen_trans_eQTLs	NA	No	NA	0.003258	rs3858704	45
ENSG00000150337	FCGR1A	1	149754227	149764074	1	protein_coding	2210	FCGR1A	0.971633	-0.861126	0	0	11	4.5074e-20	0	eQTLGen_trans_eQTLs	NA	No	NA	1.572e-11	rs2078847;rs2040571;rs3858704	45
ENSG00000143384	MCL1	1	150547032	150552066	-1	protein_coding	4170	MCL1	0.950093	-0.4059	0	0	5	2.7805e-06	0.0203646	eQTLGen_trans_eQTLs	NA	No	NA	NA	rs3858704	45
ENSG00000143409	FAM63A	1	150969025	150980851	-1	protein_coding	55793	FAM63A	8.24251e-06	-0.357503	0	0	6	2.3151e-09	7.39235e-05	eQTLGen_trans_eQTLs	NA	No	NA	NA	rs3858704	45
ENSG00000143416	SELENBP1	1	151336778	151345209	-1	protein_coding	8991	SELENBP1	1.22411e-06	-0.425587	0	0	19	4.0878e-09	0.000105522	eQTLGen_trans_eQTLs	NA	No	NA	2.972e-20	rs6065904;rs435306;rs5754422;rs464161;rs131654	62:63
ENSG00000197747	S100A10	1	151955391	151966866	-1	protein_coding	6281	S100A10	0.173245	-0.607634	0	0	10	4.4622e-48	0	eQTLGen_trans_eQTLs	NA	No	NA	0.003258	rs3858704	45
ENSG00000196154	S100A4	1	153516089	153522612	-1	protein_coding	6275	S100A4	0.00465146	0.0479362	0	0	3	1.9017e-06	0.0145649	eQTLGen_trans_eQTLs	NA	No	NA	NA	rs3858704	45
ENSG00000163346	PBXIP1	1	154916552	154928599	-1	protein_coding	57326	PBXIP1	5.79844e-07	0.443723	0	0	8	4.5999e-14	0	eQTLGen_trans_eQTLs	NA	No	NA	0.003258	rs3858704	45
ENSG00000143537	ADAM15	1	155023042	155035252	1	protein_coding	8751	ADAM15	1.07719e-11	NA	0	0	1	2.4991e-06	0.0183745	eQTLGen_trans_eQTLs	NA	No	NA	NA	rs3858704	45
ENSG00000169242	EFNA1	1	155099936	155107333	1	protein_coding	1942	EFNA1	0.872063	0.409868	0	0	1	5.062e-06	0.0332275	eQTLGen_trans_eQTLs	NA	No	NA	0.003258	rs3858704	45
ENSG00000169231	THBS3	1	155165379	155178842	-1	protein_coding	7059	THBS3	1.20601e-08	-0.314766	0	0	4	1.7356e-06	0.0134704	eQTLGen_trans_eQTLs	NA	No	NA	NA	rs3858704	45
ENSG00000173171	MTX1	1	155178490	155183615	1	protein_coding	4580	MTX1	0.198221	-0.480958	0	0	8	1.0957e-09	3.92927e-05	eQTLGen_trans_eQTLs	NA	No	NA	0.003258	rs3858704	45
ENSG00000160789	LMNA	1	156052364	156109880	1	protein_coding	4000	LMNA	0.993449	-0.15153	0	0	10	9.783e-14	0	eQTLGen_trans_eQTLs	NA	No	NA	1.599e-13	rs2245019;rs3858704	1 day, 4:45:00
ENSG00000143297	FCRL5	1	157483167	157522310	-1	protein_coding	83416	FCRL5	7.49245e-14	3.93102	0	0	4	8.3758e-07	0.00707973	eQTLGen_trans_eQTLs	NA	No	NA	NA	rs3858704	45
ENSG00000163568	AIM2	1	159032274	159116886	-1	protein_coding	9447	AIM2	9.00843e-08	0.445391	0	0	6	3.2946e-09	0.0001053	eQTLGen_trans_eQTLs	NA	No	NA	NA	rs3858704	45
ENSG00000179639	FCER1A	1	159259504	159278014	1	protein_coding	2205	FCER1A	0.00255803	0.100804	0	0	1	5.8317e-06	0.0374973	eQTLGen_trans_eQTLs	NA	No	NA	NA	rs651821;rs180326;rs11604424	44
ENSG00000213085	CCDC19	1	159842154	159869953	-1	protein_coding	25790	CCDC19	2.35996e-10	-0.13242	0	0	8	1.949e-09	5.62535e-05	eQTLGen_trans_eQTLs	NA	No	NA	0.003258	rs3858704	45
ENSG00000158710	TAGLN2	1	159887897	159895522	-1	protein_coding	8407	TAGLN2	0.00329073	-0.525894	0	0	8	4.9786e-17	0	eQTLGen_trans_eQTLs	NA	No	NA	0.003258	rs3858704	45
ENSG00000072694	FCGR2B	1	161551101	161648444	1	protein_coding	2213	FCGR2B	0.0474026	-0.652848	0	0	5	1.0207e-07	0.00113813	eQTLGen_trans_eQTLs	NA	No	NA	0.003258	rs3858704	45
ENSG00000132185	FCRLA	1	161676762	161684142	1	protein_coding	84824	FCRLA	0.000166358	0.843595	0	0	8	6.6398e-12	0	eQTLGen_trans_eQTLs	NA	No	NA	0.003258	rs3858704	45
ENSG00000198574	SH2D1B	1	162365056	162381928	-1	protein_coding	117157	SH2D1B	0.0598834	-0.582705	0	0	6	6.5721e-07	0.00572397	eQTLGen_trans_eQTLs	NA	No	NA	NA	rs3858704	45
ENSG00000117586	TNFSF4	1	173152873	173176452	-1	protein_coding	7292	TNFSF4	0.12523	0.177868	0	0	1	7.1357e-06	0.0440014	eQTLGen_trans_eQTLs	NA	No	NA	0.01301	rs3858704	45
ENSG00000152061	RABGAP1L	1	174128548	174964445	1	protein_coding	9910	RABGAP1L	0.0891727	NA	0	0	8	1.8201e-10	0	eQTLGen_trans_eQTLs	NA	No	NA	0.003258	rs3858704	45
ENSG00000116191	RALGPS2	1	178694300	178889238	1	protein_coding	55103	RALGPS2	0.922195	-0.19166	0	0	7	2.1885e-08	0.000257771	eQTLGen_trans_eQTLs	NA	No	NA	0.003258	rs3858704	45
ENSG00000198216	CACNA1E	1	181382238	181777219	1	protein_coding	777	CACNA1E	1	-0.119553	0	0	4	8.7344e-07	0.00730049	eQTLGen_trans_eQTLs	NA	No	NA	NA	rs3858704	45
ENSG00000135838	NPL	1	182758428	182799519	1	protein_coding	80896	NPL	4.51265e-07	0.270895	0	0	3	5.7181e-08	0.000809439	eQTLGen_trans_eQTLs	NA	No	NA	1.65e-11	rs2285626;rs12979148;rs7249692	59
ENSG00000135862	LAMC1	1	182992595	183114727	1	protein_coding	3915	LAMC1	1	2.11728	0	0	7	1.9816e-08	0.000245173	eQTLGen_trans_eQTLs	NA	No	NA	0.003258	rs3858704	45
ENSG00000073756	PTGS2	1	186640923	186649559	-1	protein_coding	5743	PTGS2	0.999033	0.48129	0	0	1	3.2587e-06	0.0232551	eQTLGen_trans_eQTLs	NA	No	NA	NA	rs3858704	45
ENSG00000150681	RGS18	1	192127587	192154945	1	protein_coding	64407	RGS18	0.0908284	-0.786493	0	0	2	1.4485e-09	5.7648e-05	eQTLGen_trans_eQTLs	NA	No	NA	0.01164	rs3858704	45
ENSG00000116741	RGS2	1	192778169	192781403	1	protein_coding	5997	RGS2	0.00294512	-0.124141	0	0	5	1.6985e-08	0.00023227	eQTLGen_trans_eQTLs	NA	No	NA	NA	rs3858704	45
ENSG00000058668	ATP2B4	1	203595689	203713209	1	protein_coding	493	ATP2B4	0.521756	-0.814157	0	0	8	9.5461e-20	0	eQTLGen_trans_eQTLs	NA	No	NA	0.003258	rs3858704	45
ENSG00000133069	TMCC2	1	205197304	205242471	1	protein_coding	9911	TMCC2	0.288836	-0.113914	0	0	2	5.1889e-06	0.0338743	eQTLGen_trans_eQTLs	NA	No	NA	0.01164	rs3858704	45
ENSG00000158715	SLC45A3	1	205626979	205649587	-1	protein_coding	85414	SLC45A3	0.0368495	0.153854	0	0	4	1.0503e-07	0.00118618	eQTLGen_trans_eQTLs	NA	No	NA	8.45e-131	rs651821;rs180326;rs11604424;rs10892023;rs236916	44
ENSG00000136653	RASSF5	1	206680879	206762616	1	protein_coding	83593	RASSF5	0.248711	0.461149	0	0	6	2.4753e-08	0.000329835	eQTLGen_trans_eQTLs	NA	No	NA	NA	rs3858704	45
ENSG00000196352	CD55	1	207494853	207534311	1	protein_coding	1604	CD55	2.49092e-07	-0.685451	0	0	4	5.0501e-07	0.00441395	eQTLGen_trans_eQTLs	NA	No	NA	NA	rs3858704	45
ENSG00000117322	CR2	1	207627575	207663240	1	protein_coding	1380	CR2	2.1654e-11	-0.533724	0	0	3	2.5662e-06	0.0188011	eQTLGen_trans_eQTLs	NA	No	NA	NA	rs3858704	45
ENSG00000117335	CD46	1	207925402	207968858	1	protein_coding	4179	CD46	0.000191603	-0.601552	0	0	5	4.5495e-07	0.00407459	eQTLGen_trans_eQTLs	NA	No	NA	NA	rs3858704	45
ENSG00000123684	LPGAT1	1	211916799	212004114	-1	protein_coding	9926	LPGAT1	0.967547	1.85478	0	0	2	4.4367e-06	0.0297869	eQTLGen_trans_eQTLs	NA	No	NA	NA	rs3858704	45
ENSG00000143771	CNIH4	1	224544552	224567161	1	protein_coding	29097	CNIH4	0.084725	0.734053	0	0	1	8.0293e-06	0.0486312	eQTLGen_trans_eQTLs	NA	No	NA	NA	rs3858704	45
ENSG00000143774	GUK1	1	228327663	228336685	1	protein_coding	2987	GUK1	0.00010002	-0.116912	0	0	13	3.4132e-08	0.000448625	eQTLGen_trans_eQTLs	NA	No	NA	7.963e-20	rs5754422;rs464161;rs131654	63
ENSG00000162913	C1orf145	1	228391207	228401365	-1	protein_coding	NA	C1orf145	0.0976807	NA	0	0	4	1.9417e-06	0.0148695	eQTLGen_trans_eQTLs	NA	No	NA	NA	rs3858704	45
ENSG00000154358	OBSCN	1	228395831	228566577	1	protein_coding	84033	OBSCN	5.35739e-91	0.665406	0	0	7	2.5615e-11	0	eQTLGen_trans_eQTLs	NA	No	NA	0.003258	rs3858704	45
ENSG00000035115	SH3YL1	2	217730	266398	-1	protein_coding	26751	SH3YL1	1.00024e-05	-0.103902	0	0	207	1.2076e-18	0	eQTLGen_cis_eQTLs	NA	Yes	Adult_Cortex:Fetal_Cortex	6.641e-10	rs6717005;rs13029479;rs6717005:rs6717005	7
ENSG00000143727	ACP1	2	264140	278283	1	protein_coding	52	ACP1	0.00220753	-0.305213	0	0	11	4.9717e-07	0.00440299	eQTLGen_trans_eQTLs	NA	Yes	Adult_Cortex:Fetal_Cortex	2.357e-19	rs5754422;rs464161;rs131654;rs6717005:rs6717005;rs13029479	0.335417
ENSG00000189292	FAM150B	2	279558	288851	-1	protein_coding	285016	FAM150B	0.384938	NA	0	0	212	3.831e-06	3.23877e-05	GTEx/v8/Adipose_Subcutaneous:GTEx/v8/Skin_Sun_Exposed_Lower_leg:GTEx/v7/Skin_Sun_Exposed_Lower_leg	NA	Yes	Promoter_anchored_loops:Spleen:IMR90:Mesendoderm:Neural_Progenitor_Cell:Trophoblast-like_Cell:hESC	6.641e-10	rs6717005;rs13029479;rs6717005:rs6717005	7
ENSG00000151353	TMEM18	2	667335	677439	-1	protein_coding	129787	TMEM18	0.0536351	-0.434029	2	8.402	4	2.6037e-11	0	eQTLcatalogue/TwinsUK_ge_fat:eQTLGen_cis_eQTLs:BIOSQTL/BIOS_eQTL_geneLevel:GTEx/v8/Adipose_Visceral_Omentum:GTEx/v8/Artery_Tibial:GTEx/v8/Muscle_Skeletal:GTEx/v8/Cells_Cultured_fibroblasts:GTEx/v7/Muscle_Skeletal:GTEx/v6/Muscle_Skeletal	NA	No	NA	1.446e-08	rs6717005;rs13029479	7
ENSG00000151692	RNF144A	2	7057523	7208417	1	protein_coding	9781	RNF144A	0.988258	0.0301936	0	0	8	2.6076e-12	0	eQTLGen_trans_eQTLs	NA	No	NA	0.003258	rs3858704	45
ENSG00000134308	YWHAQ	2	9724101	9771143	-1	protein_coding	10971	YWHAQ	0.873108	-0.532345	0	0	8	6.1191e-11	0	eQTLGen_trans_eQTLs	NA	No	NA	0.003258	rs3858704	45
ENSG00000172059	KLF11	2	10182976	10194963	1	protein_coding	8462	KLF11	0.00111669	-0.421282	0	0	1	3.3129e-06	0.0234873	eQTLGen_trans_eQTLs	NA	No	NA	2.083e-13	rs4665963;rs780095	9
ENSG00000171848	RRM2	2	10262455	10271545	1	protein_coding	6241	RRM2	0.968271	-0.828648	0	0	4	5.668e-07	0.00496067	eQTLGen_trans_eQTLs	NA	No	NA	NA	rs3858704	45
ENSG00000115758	ODC1	2	10580094	10588630	-1	protein_coding	4953	ODC1	0.950802	NA	0	0	15	6.5395e-14	0	eQTLGen_trans_eQTLs	NA	No	NA	2.972e-20	rs5754422;rs464161;rs131654	63
ENSG00000183891	TTC32	2	20096404	20101747	-1	protein_coding	130502	TTC32	0.0898979	0.0906132	0	0	46	1.3208e-86	0	eQTLcatalogue/CEDAR_B-cell_CD19:eQTLcatalogue/CEDAR_monocyte_CD14:eQTLcatalogue/CEDAR_T-cell_CD4:eQTLcatalogue/CEDAR_T-cell_CD8:eQTLcatalogue/HipSci_ge_iPSC:eQTLcatalogue/TwinsUK_ge_fat:PsychENCODE_eQTLs:eQTLGen_cis_eQTLs:GTEx/v8/Breast_Mammary_Tissue:GTEx/v8/Cells_Cultured_fibroblasts	NA	Yes	GM12878:IMR90:Mesenchymal_Stem_Cell	3.144e-09	rs11693335	8
ENSG00000118965	WDR35	2	20110021	20189892	-1	protein_coding	57539	WDR35	2.64838e-16	0.0684673	0	0	36	1.2554e-09	5.58264e-18	eQTLGen_cis_eQTLs:BIOSQTL/BIOS_eQTL_geneLevel:GTEx/v8/Adipose_Subcutaneous:GTEx/v8/Nerve_Tibial:GTEx/v8/Skin_Sun_Exposed_Lower_leg:GTEx/v8/Thyroid:GTEx/v7/Lung	NA	Yes	GM12878:IMR90:Mesenchymal_Stem_Cell:Mesendoderm:Trophoblast-like_Cell:hESC	3.144e-09	rs11693335	8
ENSG00000132031	MATN3	2	20191872	20212455	-1	protein_coding	4148	MATN3	1.61181e-06	-0.325743	0	0	25	1.60602e-08	7.07784e-56	eQTLcatalogue/HipSci_ge_iPSC:eQTLcatalogue/TwinsUK_ge_fat:GTEx/v8/Adipose_Subcutaneous:GTEx/v8/Artery_Aorta:GTEx/v8/Artery_Tibial:GTEx/v8/Colon_Sigmoid:GTEx/v8/Colon_Transverse:GTEx/v8/Esophagus_Gastroesophageal_Junction:GTEx/v8/Esophagus_Muscularis:GTEx/v7/Artery_Aorta:GTEx/v7/Esophagus_Muscularis	NA	Yes	IMR90:Mesenchymal_Stem_Cell	1.024e-08	rs11693335	8
ENSG00000068697	LAPTM4A	2	20232411	20251789	-1	protein_coding	9741	LAPTM4A	0.503802	0.0942831	0	0	6	5.0236e-06	2.22235e-42	eQTLGen_cis_eQTLs:GTEx/v8/Adrenal_Gland	NA	No	NA	6.022e-09	rs11693335	8
ENSG00000115884	SDC1	2	20400558	20425194	-1	protein_coding	6382	SDC1	0.29047	-1.71741	15	22.1	51	4.72337e-14	1.38539e-13	eQTLcatalogue/TwinsUK_ge_skin:GTEx/v8/Adipose_Subcutaneous:GTEx/v8/Artery_Tibial:GTEx/v8/Colon_Transverse:GTEx/v8/Esophagus_Muscularis:GTEx/v8/Nerve_Tibial:GTEx/v8/Cells_Cultured_fibroblasts:GTEx/v8/Skin_Not_Sun_Exposed_Suprapubic:GTEx/v8/Skin_Sun_Exposed_Lower_leg:GTEx/v8/Thyroid:GTEx/v7/Adipose_Subcutaneous:GTEx/v7/Artery_Tibial:GTEx/v7/Nerve_Tibial:GTEx/v7/Cells_Transformed_fibroblasts:GTEx/v7…	NA	Yes	Liver:Spleen:GM12878:IMR90:Mesenchymal_Stem_Cell:Mesendoderm:Trophoblast-like_Cell	3.144e-09	rs11693335	8
ENSG00000143878	RHOB	2	20646835	20649200	1	protein_coding	388	RHOB	0.245031	-0.338453	0	0	7	2.0563e-08	0.000243865	eQTLGen_trans_eQTLs	NA	No	NA	0.01301	rs3858704	45
ENSG00000084733	RAB10	2	26256976	26360323	1	protein_coding	10890	RAB10	0.944405	-0.583905	0	0	1	6.97111e-06	0.0348556	eQTLcatalogue/GENCORD_ge_fibroblast	NA	Yes	Promoter_anchored_loops:Adult_Cortex	6.968e-09	rs4665963;rs4665963:rs11693959:rs62131877:rs4665963;rs780095	9
ENSG00000173567	GPR113	2	26531041	26569685	-1	protein_coding	165082	GPR113	1.48529e-10	0.291622	0	0	6	2.18475e-05	2.61983e-39	GTEx/v8/Adrenal_Gland:GTEx/v8/Pancreas	NA	Yes	Promoter_anchored_loops:Adult_Cortex:Fetal_Cortex:Liver:GM12878:IMR90:Mesenchymal_Stem_Cell:Mesendoderm:Trophoblast-like_Cell:hESC	6.968e-09	rs4665963;rs62131877;rs78484886:rs4665963:rs11693959:rs62131877:rs4665963;rs780095	9
ENSG00000138018	EPT1	2	26531415	26618759	1	protein_coding	85465	EPT1	0.347462	-0.709327	2	3.768	0	NA	NA	NA	NA	Yes	IMR90:Mesenchymal_Stem_Cell:Mesendoderm	NA	rs4665963	9
ENSG00000157856	DRC1	2	26624784	26679579	1	protein_coding	92749	DRC1	1.30453e-10	0.353226	5	20.4	3	2.4681e-22	0	TIGER/Nom_Alonso_Pancreatic_islets:eQTLcatalogue/BLUEPRINT_ge_neutrophil:eQTLGen_cis_eQTLs:BIOSQTL/BIOS_eQTL_geneLevel:GTEx/v8/Whole_Blood:GTEx/v7/Whole_Blood	NA	Yes	Adult_Cortex:Fetal_Cortex:Aorta:Left_Ventricle:Liver:Right_Ventricle:GM12878:IMR90:Mesenchymal_Stem_Cell:Mesendoderm:Neural_Progenitor_Cell:Trophoblast-like_Cell:hESC	6.968e-09	rs4665963;rs4665963:rs78484886:rs11693959:rs62131877:rs4665963;rs780095:rs780095;rs11693959:rs1659684	9
ENSG00000115155	OTOF	2	26680071	26781566	-1	protein_coding	9381	OTOF	4.326e-25	0.460679	7	20.4	16	1.45711e-10	0	eQTLcatalogue/CEDAR_neutrophil_CD15:eQTLGen_cis_eQTLs:eQTLGen_trans_eQTLs:GTEx/v8/Brain_Caudate_basal_ganglia:GTEx/v8/Brain_Cerebellar_Hemisphere:GTEx/v8/Brain_Cerebellum:GTEx/v8/Esophagus_Muscularis:GTEx/v8/Muscle_Skeletal:GTEx/v7/Brain_Cerebellum	NA	Yes	Left_Ventricle:Spleen:IMR90:Mesenchymal_Stem_Cell:Mesendoderm:Trophoblast-like_Cell:hESC	1.517e-07	rs4665963;rs3858704;rs4665963:rs78484886	09:45:00
ENSG00000173557	C2orf70	2	26785450	26802400	1	protein_coding	339778	C2orf70	0.000944694	-0.0328751	1	0.274	2	1.6914e-06	3.38792e-27	GTEx/v8/Nerve_Tibial:GTEx/v8/Thyroid:GTEx/v7/Testis:GTEx/v7/Thyroid	NA	Yes	Left_Ventricle:Spleen:IMR90:Mesenchymal_Stem_Cell:Mesendoderm:Trophoblast-like_Cell:hESC	1.517e-07	rs4665963;rs4665963:rs78484886	9
ENSG00000157884	CIB4	2	26804070	26864236	-1	protein_coding	130106	CIB4	2.30346e-06	0.826577	2	1.981	1	1.00009e-06	0.000295274	GTEx/v8/Adrenal_Gland:GTEx/v7/Adrenal_Gland	NA	Yes	Promoter_anchored_loops:Spleen:IMR90:Mesenchymal_Stem_Cell:Mesendoderm:Trophoblast-like_Cell:hESC	1.517e-07	rs4665963;rs78484886;rs4665963:rs78484886	9
ENSG00000171303	KCNK3	2	26915619	26956288	1	protein_coding	3777	KCNK3	NA	0.226319	13	15.4	11	3.94915e-09	1.5736e-06	EyeGEx:GTEx/v7/Esophagus_Muscularis	NA	Yes	Promoter_anchored_loops:Fetal_Cortex:Left_Ventricle:Liver:Pancreas:Spleen:GM12878:IMR90:Mesenchymal_Stem_Cell:Mesendoderm:Trophoblast-like_Cell:hESC	1.517e-07	rs4665963;rs78484886;rs2178198;rs11693959;rs78484886:rs4665963	9
ENSG00000213699	SLC35F6	2	26987152	27004099	1	protein_coding	54978	SLC35F6	0.0161308	-0.353051	4	9.998	20	1.3334e-35	0	eQTLcatalogue/BLUEPRINT_ge_monocyte:eQTLcatalogue/Nedelec_2016_ge_macrophage_naive:PsychENCODE_eQTLs:eQTLGen_cis_eQTLs:BIOSQTL/BIOS_eQTL_geneLevel:CMC_SVA_cis:GTEx/v8/Adipose_Subcutaneous:GTEx/v8/Whole_Blood:GTEx/v8/Nerve_Tibial	NA	Yes	Adult_Cortex:Fetal_Cortex:Left_Ventricle:Liver:Spleen:GM12878:IMR90:Mesenchymal_Stem_Cell:Mesendoderm:Neural_Progenitor_Cell:Trophoblast-like_Cell:hESC	6.968e-09	rs4665963;rs78484886;rs2178198;rs11693959;rs4665963:rs78484886:rs11693959:rs62131877:rs4665963;rs780095:rs780095	9
ENSG00000115163	CENPA	2	26987157	27023935	1	protein_coding	1058	CENPA	0.139975	-0.808381	5	9.998	20	5.86386e-13	3.03013e-33	GTEx/v8/Adipose_Subcutaneous:GTEx/v8/Breast_Mammary_Tissue:GTEx/v8/Heart_Left_Ventricle:GTEx/v8/Nerve_Tibial:GTEx/v7/Adipose_Subcutaneous:GTEx/v7/Adipose_Visceral_Omentum:GTEx/v7/Nerve_Tibial:GTEx/v6/Adipose_Subcutaneous:GTEx/v6/Nerve_Tibial	NA	Yes	Adult_Cortex:Fetal_Cortex:Left_Ventricle:Liver:Spleen:GM12878:IMR90:Mesenchymal_Stem_Cell:Mesendoderm:Neural_Progenitor_Cell:Trophoblast-like_Cell:hESC	5.764e-10	rs4665963;rs78484886;rs2178198;rs1659684;rs4665963:rs78484886:rs11693959:rs62131877:rs4665963;rs780095:rs780095;rs11693959	9
ENSG00000157851	DPYSL5	2	27070615	27173219	1	protein_coding	56896	DPYSL5	0.998332	-1.35954	5	17.33	106	0	0	PsychENCODE_eQTLs:xQTLServer_eQTLs:CMC_SVA_cis:CMC_NoSVA_cis:GTEx/v8/Brain_Amygdala:GTEx/v8/Brain_Cerebellar_Hemisphere:GTEx/v8/Brain_Cerebellum:GTEx/v8/Brain_Cortex:GTEx/v8/Brain_Frontal_Cortex_BA9:GTEx/v8/Brain_Hippocampus:GTEx/v8/Brain_Spinal_cord_cervical_c-1:GTEx/v8/Brain_Substantia_nigra:GTEx/v8/Esophagus_Muscularis:GTEx/v8/Muscle_Skeletal:GTEx/v7/Brain_Cerebellum:GTEx/v7/Brain_Cortex:GTEx/…	NA	Yes	Adult_Cortex:IMR90:Mesenchymal_Stem_Cell:Mesendoderm	2.512e-13	rs78484886;rs4665963;rs1659684;rs780095;rs11693959;rs2178198;rs6744393;rs3792252;rs78484886:rs4665963	9
ENSG00000084764	MAPRE3	2	27193480	27250064	1	protein_coding	22924	MAPRE3	0.799864	-0.767319	4	4.898	61	1.0152e-42	0	eQTLcatalogue/Fairfax_2014_LPS24:eQTLcatalogue/Fairfax_2014_naive:eQTLcatalogue/TwinsUK_ge_fat:eQTLGen_cis_eQTLs:eQTLGen_trans_eQTLs:BIOSQTL/BIOS_eQTL_geneLevel:CMC_SVA_cis:GTEx/v8/Adipose_Subcutaneous:GTEx/v8/Adipose_Visceral_Omentum:GTEx/v8/Adrenal_Gland:GTEx/v8/Artery_Tibial:GTEx/v8/Esophagus_Mucosa:GTEx/v8/Heart_Atrial_Appendage:GTEx/v8/Muscle_Skeletal:GTEx/v8/Nerve_Tibial:GTEx/v8/Ovary:GTEx/…	NA	Yes	Promoter_anchored_loops:Adult_Cortex:Fetal_Cortex:Left_Ventricle:Liver:Spleen:GM12878:IMR90:Mesenchymal_Stem_Cell:Mesendoderm:Trophoblast-like_Cell:hESC	1.04e-18	rs78484886;rs4665963;rs11693959;rs1659684;rs780095;rs6744393;rs3792252;rs3858704;rs2178198;rs4665963:rs11693959:rs78484886:rs1659684:rs62131877:rs4665963;rs780095:rs2178198:rs4665963;rs62131877:rs780095;rs11693959:rs2178198	09:45:00
ENSG00000119777	TMEM214	2	27255778	27264563	1	protein_coding	54867	TMEM214	0.00116736	-0.517228	0	0	9	1.1669e-07	0.000395133	DICE/T_CD8_naive_activated:eQTLGen_cis_eQTLs:BIOSQTL/BIOS_eQTL_geneLevel	NA	Yes	Promoter_anchored_loops:Adult_Cortex:Fetal_Cortex:GM12878:IMR90:Mesenchymal_Stem_Cell	5.138e-21	rs6744393;rs4665963;rs62131877;rs4665963:rs78484886:rs11693959:rs62131877:rs4665963;rs780095:rs2178198;rs78484886:rs1659684:rs2178198:rs4665963;rs62131877:rs780095;rs11693959	9
ENSG00000084693	AGBL5	2	27265232	27293490	1	protein_coding	60509	AGBL5	0.0206949	-0.378651	1	8.797	13	1.0859e-06	0.000839621	eQTLcatalogue/CEDAR_T-cell_CD4:eQTLGen_cis_eQTLs:GTEx/v8/Esophagus_Mucosa:GTEx/v8/Cells_Cultured_fibroblasts	NA	Yes	Promoter_anchored_loops:GM12878:IMR90:Mesenchymal_Stem_Cell	1.026e-13	rs4665963;rs2178198;rs78484886;rs1659684;rs4665963:rs2178198:rs62131877:rs11693959:rs4665963;rs780095:rs78484886:rs4665963;rs62131877:rs780095;rs11693959:rs2178198;rs78484886:rs1659684	9
ENSG00000228474	OST4	2	27293340	27294641	-1	protein_coding	100128731	OST4	NA	NA	0	0	8	1.68166e-06	0.00632524	CMC_SVA_cis:GTEx/v8/Cells_Cultured_fibroblasts:GTEx/v6/Colon_Transverse	NA	Yes	Adult_Cortex:Fetal_Cortex:Left_Ventricle:Liver:Spleen:GM12878:IMR90:Mesenchymal_Stem_Cell:Mesendoderm:Trophoblast-like_Cell:hESC	1.026e-13	rs11693959;rs4665963;rs78484886:rs4665963:rs62131877:rs11693959:rs4665963;rs780095:rs2178198;rs78484886:rs1659684:rs780095;rs11693959:rs2178198:rs4665963;rs62131877	9
ENSG00000138080	EMILIN1	2	27301435	27309271	1	protein_coding	11117	EMILIN1	0.00521656	NA	1	0.557	10	1.71047e-05	0.000214913	EyeGEx:CMC_SVA_cis:GTEx/v8/Whole_Blood	NA	Yes	Promoter_anchored_loops:Adult_Cortex:Fetal_Cortex:Left_Ventricle:Liver:Spleen:GM12878:IMR90:Mesenchymal_Stem_Cell:Mesendoderm:Trophoblast-like_Cell:hESC	1.026e-13	rs4665963;rs78484886;rs62131877;rs1659684;rs4665963:rs4665963;rs780095:rs78484886:rs11693959:rs1659684:rs62131877:rs2178198;rs78484886:rs780095;rs11693959:rs4665963;rs780095;rs11693959:rs2178198:rs4665963	9
ENSG00000138030	KHK	2	27309615	27323640	1	protein_coding	3795	KHK	5.36079e-05	NA	3	14.78	616	3.27170000000001e-310	0	TIGER/Nom_Alonso_Pancreatic_islets:EyeGEx:eQTLcatalogue/BLUEPRINT_ge_monocyte:eQTLcatalogue/BLUEPRINT_ge_T-cell:eQTLcatalogue/Fairfax_2014_naive:eQTLcatalogue/GENCORD_ge_T-cell:eQTLcatalogue/Lepik_2017_ge_blood:eQTLcatalogue/Nedelec_2016_ge_macrophage_Listeria:eQTLcatalogue/TwinsUK_ge_blood:eQTLcatalogue/TwinsUK_ge_fat:eQTLcatalogue/TwinsUK_ge_LCL:eQTLcatalogue/TwinsUK_ge_skin:PsychENCODE_eQTLs:D…	NA	Yes	Promoter_anchored_loops:Adult_Cortex:Fetal_Cortex:Left_Ventricle:Liver:Spleen:GM12878:IMR90:Mesenchymal_Stem_Cell:Mesendoderm:Trophoblast-like_Cell:hESC	5.138e-21	rs4665963;rs78484886;rs1659684;rs11693959;rs6744393;rs3792252;rs62131877;rs2178198;rs780095;rs74446114;rs78484886:rs4665963:rs11693959:rs62131877:rs1659684:rs2178198:rs4665963;rs62131877:rs4665963;rs780095:rs2178198;rs78484886:rs780095;rs11693959:rs4665963	9
ENSG00000138028	CGREF1	2	27321757	27341995	-1	protein_coding	10669	CGREF1	5.50291e-08	0.491986	4	14.78	513	8.91063e-171	0	TIGER/Nom_Alonso_Pancreatic_islets:eQTLcatalogue/GENCORD_ge_fibroblast:eQTLcatalogue/GENCORD_ge_LCL:eQTLcatalogue/GENCORD_ge_T-cell:eQTLcatalogue/HipSci_ge_iPSC:eQTLcatalogue/TwinsUK_ge_LCL:eQTLcatalogue/TwinsUK_ge_skin:PsychENCODE_eQTLs:DICE/T_CD4_naive_activated:DICE/T_CD8_naive_activated:DICE/T_CD4_TH17:eQTLGen_cis_eQTLs:BIOSQTL/BIOS_eQTL_geneLevel:CMC_SVA_cis:CMC_NoSVA_cis:GTEx/v8/Whole_Blood…	NA	Yes	Promoter_anchored_loops:Adult_Cortex:Fetal_Cortex:Aorta:Left_Ventricle:Liver:Spleen:GM12878:IMR90:Mesenchymal_Stem_Cell:Mesendoderm:Trophoblast-like_Cell:hESC	5.138e-21	rs4665963;rs78484886;rs11693959;rs2178198;rs1659684;rs780095;rs74446114;rs62131877;rs6744393;rs3792252;rs6758814;rs2178198:rs4665963:rs4665963;rs62131877:rs62131877:rs4665963;rs780095:rs78484886:rs2178198;rs78484886:rs11693959:rs1659684:rs780095;rs11693959:rs4665963;rs11693959:rs6744393	9
ENSG00000143994	ABHD1	2	27346682	27353680	1	protein_coding	84696	ABHD1	1.06027e-21	-0.251069	8	11.58	29	3.3669e-25	0	EyeGEx:PsychENCODE_eQTLs:eQTLGen_cis_eQTLs:BIOSQTL/BIOS_eQTL_geneLevel:GTEx/v8/Adipose_Visceral_Omentum:GTEx/v8/Brain_Caudate_basal_ganglia:GTEx/v8/Brain_Putamen_basal_ganglia:GTEx/v8/Breast_Mammary_Tissue:GTEx/v8/Colon_Sigmoid:GTEx/v8/Heart_Left_Ventricle:GTEx/v8/Muscle_Skeletal:GTEx/v8/Nerve_Tibial:GTEx/v8/Cells_Cultured_fibroblasts:GTEx/v8/Thyroid:GTEx/v7/Adipose_Visceral_Omentum:GTEx/v7/Brain…	NA	Yes	Promoter_anchored_loops:Adult_Cortex:Fetal_Cortex:Aorta:Left_Ventricle:Liver:Spleen:GM12878:IMR90:Mesenchymal_Stem_Cell:Mesendoderm:Trophoblast-like_Cell:hESC	1.026e-13	rs11693959;rs1659684;rs4665963;rs780095;rs2178198;rs78484886;rs2178198:rs4665963:rs4665963;rs62131877:rs62131877:rs4665963;rs780095:rs78484886:rs2178198;rs78484886:rs11693959:rs1659684:rs780095;rs11693959:rs4665963;rs11693959:rs6744393	9
ENSG00000138073	PREB	2	27353624	27357543	-1	protein_coding	10113	PREB	0.00189836	-0.154459	8	11.58	122	1.1885e-11	0	TIGER/Nom_Alonso_Pancreatic_islets:eQTLcatalogue/TwinsUK_ge_fat:PsychENCODE_eQTLs:eQTLGen_cis_eQTLs:BIOSQTL/BIOS_eQTL_geneLevel:GTEx/v8/Adipose_Subcutaneous:GTEx/v8/Whole_Blood:GTEx/v8/Artery_Tibial:GTEx/v8/Spleen	NA	Yes	Promoter_anchored_loops:Adult_Cortex:Fetal_Cortex:Aorta:Left_Ventricle:Liver:Spleen:GM12878:IMR90:Mesenchymal_Stem_Cell:Mesendoderm:Trophoblast-like_Cell:hESC	8.674e-14	rs11693959;rs1659684;rs4665963;rs62131877;rs62131877:rs11693959:rs2178198;rs78484886:rs4665963;rs780095:rs1659684:rs78484886:rs4665963:rs2178198:rs780095;rs11693959:rs4665963	9
ENSG00000186143	C2orf53	2	27359723	27362278	-1	protein_coding	339779	C2orf53	1.54927e-09	0.624914	9	11.58	1	4.78458e-05	0.049	DICE/T_CD4_TH1_17	NA	Yes	Promoter_anchored_loops:Fetal_Cortex:Spleen:GM12878:IMR90:Mesenchymal_Stem_Cell:Mesendoderm	1.131e-13	rs11693959;rs1659684;rs4665963;rs2178198;rs4665963:rs78484886:rs62131877:rs1659684:rs2178198:rs11693959:rs4665963;rs62131877:rs4665963;rs780095:rs2178198;rs78484886	9
ENSG00000163792	TCF23	2	27371872	27376378	1	protein_coding	150921	TCF23	0.000503312	-0.683069	17	9.417	25	9.30138e-06	0.00428648	DICE/T_CD4_TH1_17:GTEx/v8/Skin_Sun_Exposed_Lower_leg:GTEx/v6/Adipose_Visceral_Omentum	NA	Yes	Promoter_anchored_loops:Spleen:GM12878:IMR90:Mesenchymal_Stem_Cell:Mesendoderm	1.131e-13	rs4665963;rs1659684;rs78484886;rs2178198;rs62131877;rs3792252;rs11693959;rs4665963:rs62131877:rs4665963;rs62131877:rs4665963;rs780095:rs78484886:rs11693959:rs1659684:rs2178198:rs2178198	9
ENSG00000138074	SLC5A6	2	27422455	27435826	-1	protein_coding	8884	SLC5A6	0.571968	-0.400099	72	21.1	530	3.27170000000001e-310	0	TIGER/Nom_Alonso_Pancreatic_islets:EyeGEx:eQTLcatalogue/BLUEPRINT_ge_monocyte:eQTLcatalogue/CEDAR_B-cell_CD19:eQTLcatalogue/CEDAR_T-cell_CD8:eQTLcatalogue/Fairfax_2012_B-cell_CD19:eQTLcatalogue/Fairfax_2014_IFN24:eQTLcatalogue/Fairfax_2014_naive:eQTLcatalogue/GENCORD_ge_T-cell:eQTLcatalogue/Kasela_2017_T-cell_CD4:eQTLcatalogue/Lepik_2017_ge_blood:eQTLcatalogue/TwinsUK_ge_fat:eQTLcatalogue/TwinsUK…	NA	Yes	Promoter_anchored_loops:Adult_Cortex:Fetal_Cortex:GM12878:IMR90:Mesenchymal_Stem_Cell:Mesendoderm:hESC	1.03e-15	rs4665963;rs62131877;rs2178198;rs1659684;rs780095;rs11693959;rs3792252;rs78484886;rs6744393;rs74446114;rs6758814;rs4665963:rs78484886:rs11693959:rs62131877:rs4665963;rs780095:rs2178198;rs78484886:rs1659684:rs2178198	9
ENSG00000138085	ATRAID	2	27434895	27440046	1	protein_coding	51374	ATRAID	0.00791395	NA	48	21.1	553	5.7074e-303	0	TIGER/Nom_Alonso_Pancreatic_islets:EyeGEx:eQTLcatalogue/BLUEPRINT_ge_monocyte:eQTLcatalogue/CEDAR_monocyte_CD14:eQTLcatalogue/CEDAR_rectum:eQTLcatalogue/CEDAR_transverse_colon:eQTLcatalogue/Fairfax_2012_B-cell_CD19:eQTLcatalogue/Fairfax_2014_IFN24:eQTLcatalogue/Fairfax_2014_LPS24:eQTLcatalogue/Fairfax_2014_LPS2:eQTLcatalogue/Fairfax_2014_naive:eQTLcatalogue/GENCORD_ge_fibroblast:eQTLcatalogue/GEN…	NA	Yes	Promoter_anchored_loops:Adult_Cortex:Fetal_Cortex:GM12878:IMR90:Mesenchymal_Stem_Cell:Mesendoderm:hESC	5.138e-21	rs4665963;rs62131877;rs1659684;rs780095;rs11693959;rs74446114;rs3792252;rs2178198;rs78484886;rs6744393;rs6758814;rs4665963:rs78484886:rs11693959:rs62131877:rs4665963;rs780095:rs2178198;rs78484886:rs1659684:rs2178198	9
ENSG00000084774	CAD	2	27440258	27466811	1	protein_coding	790	CAD	1	-0.710759	84	21.1	491	2.5488e-42	0	EyeGEx:eQTLcatalogue/BLUEPRINT_ge_neutrophil:eQTLcatalogue/Fairfax_2012_B-cell_CD19:eQTLcatalogue/Lepik_2017_ge_blood:eQTLcatalogue/Quach_2016_ge_monocyte_IAV:eQTLGen_cis_eQTLs:BIOSQTL/BIOS_eQTL_geneLevel:GTEx/v8/Adipose_Subcutaneous:GTEx/v8/Whole_Blood:GTEx/v8/Brain_Hippocampus:GTEx/v8/Brain_Nucleus_accumbens_basal_ganglia:GTEx/v8/Colon_Sigmoid:GTEx/v8/Esophagus_Gastroesophageal_Junction:GTEx/v8…	NA	Yes	Promoter_anchored_loops:Adult_Cortex:Fetal_Cortex:Liver:Spleen:GM12878:IMR90:Mesenchymal_Stem_Cell:Mesendoderm:Trophoblast-like_Cell:hESC	5.138e-21	rs4665963;rs62131877;rs1659684;rs780095;rs3792252;rs11693959;rs6744393;rs2178198;rs74446114;rs78484886:rs4665963:rs1659684:rs4665963;rs780095:rs11693959:rs62131877:rs2178198;rs78484886:rs2178198:rs4665963;rs62131877:rs780095	9
ENSG00000115194	SLC30A3	2	27476552	27498685	-1	protein_coding	7781	SLC30A3	0.646084	-0.660463	56	17.22	32	2.22523e-09	7.40729e-24	PsychENCODE_eQTLs:CMC_SVA_cis:GTEx/v8/Heart_Left_Ventricle:GTEx/v7/Heart_Left_Ventricle:GTEx/v6/Heart_Left_Ventricle	NA	Yes	Promoter_anchored_loops:Fetal_Cortex:Aorta:Left_Ventricle:Liver:Spleen:GM12878:IMR90:Mesenchymal_Stem_Cell:Mesendoderm:Trophoblast-like_Cell:hESC	1.026e-13	rs4665963;rs62131877;rs2178198;rs78484886;rs11693959;rs780095;rs4665963:rs78484886:rs62131877:rs11693959:rs4665963;rs780095:rs780095;rs11693959:rs1659684:rs4665963;rs62131877:rs2178198;rs78484886:rs2178198	9
ENSG00000163793	DNAJC5G	2	27498289	27504367	1	protein_coding	285126	DNAJC5G	0.00397479	-0.706718	24	15.72	12	1.45825e-07	0.000516412	PsychENCODE_eQTLs:DICE/T_CD4_memory_TREG:GTEx/v8/Artery_Tibial:GTEx/v8/Brain_Cortex:GTEx/v7/Brain_Cortex:GTEx/v7/Testis	NA	Yes	Promoter_anchored_loops:Fetal_Cortex:Aorta:Left_Ventricle:Liver:Spleen:GM12878:IMR90:Mesenchymal_Stem_Cell:Mesendoderm:Trophoblast-like_Cell:hESC	1.026e-13	rs4665963;rs11693959;rs780095;rs2178198;rs78484886;rs6744393;rs3792252;rs4665963:rs78484886:rs62131877:rs11693959:rs4665963;rs780095:rs780095;rs11693959:rs1659684:rs4665963;rs62131877:rs2178198;rs78484886:rs2178198	9
ENSG00000138100	TRIM54	2	27505260	27530307	1	protein_coding	57159	TRIM54	8.24708e-07	-1.05327	27	15.72	227	2.53491e-11	1.1557e-07	eQTLcatalogue/CEDAR_platelet:DICE/T_CD4_TH1_17:DICE/T_CD4_memory_TREG:GTEx/v8/Brain_Anterior_cingulate_cortex_BA24:GTEx/v8/Brain_Cortex:GTEx/v8/Nerve_Tibial:GTEx/v8/Testis:GTEx/v7/Brain_Anterior_cingulate_cortex_BA24:GTEx/v7/Nerve_Tibial:GTEx/v7/Testis	NA	Yes	Promoter_anchored_loops:Adult_Cortex:Aorta:Left_Ventricle:Liver:Spleen:GM12878:IMR90:Mesenchymal_Stem_Cell:Mesendoderm:Trophoblast-like_Cell:hESC	8.674e-14	rs4665963;rs780095;rs2178198;rs78484886;rs62131877;rs3792252;rs11693959;rs1659684;rs78484886:rs11693959:rs4665963:rs1659684:rs62131877:rs2178198;rs78484886:rs4665963;rs780095:rs4665963;rs62131877:rs780095;rs11693959:rs2178198	9
ENSG00000163794	UCN	2	27530268	27531313	-1	protein_coding	7349	UCN	0.51724	-0.107138	12	9.058	102	5.7152e-07	0.00187854	eQTLGen_cis_eQTLs:CMC_SVA_cis:GTEx/v8/Esophagus_Muscularis:GTEx/v8/Muscle_Skeletal:GTEx/v8/Skin_Not_Sun_Exposed_Suprapubic:GTEx/v8/Thyroid:GTEx/v7/Thyroid:GTEx/v6/Muscle_Skeletal	NA	Yes	Promoter_anchored_loops	8.674e-14	rs2178198;rs62131877;rs4665963;rs780095;rs1659684;rs11693959;rs78484886:rs4665963:rs1659684:rs62131877:rs2178198;rs78484886	9
ENSG00000115204	MPV17	2	27532360	27548547	-1	protein_coding	4358	MPV17	1.10287e-08	-0.205369	21	18.95	119	2.73758e-10	7.89714e-07	GTEx/v8/Esophagus_Gastroesophageal_Junction:GTEx/v8/Cells_Cultured_fibroblasts:GTEx/v8/Skin_Not_Sun_Exposed_Suprapubic:GTEx/v8/Thyroid:GTEx/v7/Esophagus_Gastroesophageal_Junction:GTEx/v7/Cells_Transformed_fibroblasts:GTEx/v6/Cells_Transformed_fibroblasts	NA	Yes	Promoter_anchored_loops:Adult_Cortex:Fetal_Cortex	1.763e-19	rs2178198;rs62131877;rs4665963;rs11693959;rs780095;rs78484886;rs6744393;rs3792252;rs4665963:rs1659684:rs62131877:rs4665963;rs62131877:rs2178198:rs11693959:rs78484886:rs4665963;rs780095:rs780095;rs11693959:rs2178198;rs78484886:rs4665963;rs11693959:rs6744393;rs4665963:rs3792252;rs11693959:rs74446114;rs780095:rs6744393;rs3792252:rs3792252	9
ENSG00000115207	GTF3C2	2	27548716	27579868	-1	protein_coding	2976	GTF3C2	0.999786	-0.837016	43	18.95	405	4.80417e-15	9.16339e-11	eQTLcatalogue/TwinsUK_ge_fat:PsychENCODE_eQTLs:BIOSQTL/BIOS_eQTL_geneLevel:CMC_SVA_cis:CMC_NoSVA_cis:GTEx/v8/Thyroid:GTEx/v7/Thyroid:GTEx/v6/Thyroid	NA	Yes	Promoter_anchored_loops:Adult_Cortex:Fetal_Cortex:Liver:GM12878:IMR90:Mesenchymal_Stem_Cell:Mesendoderm:Trophoblast-like_Cell:hESC	3.138e-19	rs4665963;rs11693959;rs62131877;rs780095;rs2178198;rs78484886;rs3792252;rs74446114;rs4665963:rs62131877:rs4665963;rs62131877:rs11693959:rs2178198;rs78484886:rs4665963;rs780095:rs1659684:rs6744393;rs3792252:rs74446114;rs780095:rs3792252:rs3792252;rs11693959:rs4665963;rs11693959:rs78484886:rs6744393;rs4665963:rs780095;rs11693959:rs6744393:rs2178198:rs74446114:rs780095	9
ENSG00000115211	EIF2B4	2	27587219	27593353	-1	protein_coding	8890	EIF2B4	0.83261	-0.214235	33	11.74	331	2.4689e-25	0	eQTLcatalogue/GEUVADIS_ge_LCL:PsychENCODE_eQTLs:eQTLGen_cis_eQTLs:GTEx/v7/Colon_Sigmoid	NA	Yes	Promoter_anchored_loops:Adult_Cortex:Fetal_Cortex:Liver:GM12878:IMR90:Mesenchymal_Stem_Cell:Mesendoderm:Trophoblast-like_Cell:hESC	3.138e-19	rs62131877;rs4665963;rs780095;rs11693959;rs2178198;rs78484886;rs1659684;rs3792252;rs74446114;rs6758814;rs6744393;rs4665963:rs11693959:rs1659684:rs4665963;rs780095:rs62131877:rs4665963;rs11693959:rs4665963;rs62131877:rs2178198;rs78484886:rs78484886:rs780095;rs11693959:rs6744393;rs4665963:rs3792252;rs11693959:rs74446114;rs780095:rs6744393;rs3792252:rs3792252:rs6744393:rs2178198:rs74446114:rs780095	9
ENSG00000115234	SNX17	2	27593389	27599995	1	protein_coding	9784	SNX17	0.68618	-0.681943	32	12.85	794	0	0	eQTLcatalogue/CEDAR_T-cell_CD4:eQTLcatalogue/CEDAR_T-cell_CD8:eQTLcatalogue/Fairfax_2012_B-cell_CD19:eQTLcatalogue/Fairfax_2014_IFN24:eQTLcatalogue/Fairfax_2014_LPS24:eQTLcatalogue/Fairfax_2014_LPS2:eQTLcatalogue/Lepik_2017_ge_blood:PsychENCODE_eQTLs:eQTLGen_cis_eQTLs:BIOSQTL/BIOS_eQTL_geneLevel:xQTLServer_eQTLs:CMC_SVA_cis:GTEx/v8/Adipose_Subcutaneous:GTEx/v8/Whole_Blood:GTEx/v8/Artery_Aorta:GTE…	NA	Yes	Promoter_anchored_loops:Adult_Cortex:Fetal_Cortex:Liver:GM12878:IMR90:Mesenchymal_Stem_Cell:Mesendoderm:Trophoblast-like_Cell:hESC	5.138e-21	rs4665963;rs780095;rs62131877;rs11693959;rs2178198;rs78484886;rs1659684;rs6744393;rs3792252;rs74446114;rs6758814;rs4665963:rs11693959:rs1659684:rs4665963;rs780095:rs62131877:rs4665963;rs11693959:rs4665963;rs62131877:rs2178198;rs78484886:rs78484886:rs780095;rs11693959:rs6744393;rs4665963:rs3792252;rs11693959:rs74446114;rs780095:rs6744393;rs3792252:rs3792252:rs6744393:rs2178198:rs74446114:rs780095	9
ENSG00000163795	ZNF513	2	27600098	27603657	-1	protein_coding	130557	ZNF513	0.940738	NA	28	12.85	308	1.1229e-23	0	eQTLcatalogue/Lepik_2017_ge_blood:PsychENCODE_eQTLs:eQTLGen_cis_eQTLs:BIOSQTL/BIOS_eQTL_geneLevel:xQTLServer_eQTLs:CMC_SVA_cis:CMC_NoSVA_cis:GTEx/v8/Artery_Aorta:GTEx/v7/Brain_Anterior_cingulate_cortex_BA24:GTEx/v7/Prostate:GTEx/v7/Small_Intestine_Terminal_Ileum	NA	Yes	Promoter_anchored_loops:Adult_Cortex:Fetal_Cortex:GM12878:IMR90:Mesenchymal_Stem_Cell	1.763e-19	rs62131877;rs11693959;rs2178198;rs78484886;rs4665963;rs780095;rs1659684;rs3792252;rs6744393;rs4665963:rs4665963;rs780095:rs62131877:rs780095;rs11693959:rs78484886:rs1659684:rs11693959:rs4665963;rs11693959:rs3792252;rs11693959:rs4665963;rs62131877:rs2178198;rs78484886:rs74446114;rs780095:rs6744393;rs3792252:rs3792252:rs6744393:rs2178198:rs74446114	9
ENSG00000115241	PPM1G	2	27604061	27632554	-1	protein_coding	5496	PPM1G	0.99601	-0.482626	65	12.85	577	1.1518e-69	0	EyeGEx:eQTLcatalogue/Fairfax_2014_IFN24:eQTLcatalogue/Fairfax_2014_LPS2:eQTLcatalogue/Fairfax_2014_naive:eQTLcatalogue/Quach_2016_ge_monocyte_R848:eQTLcatalogue/TwinsUK_ge_fat:eQTLGen_cis_eQTLs:BIOSQTL/BIOS_eQTL_geneLevel:CMC_SVA_cis:GTEx/v8/Adipose_Subcutaneous:GTEx/v8/Adipose_Visceral_Omentum:GTEx/v8/Adrenal_Gland:GTEx/v8/Whole_Blood:GTEx/v8/Artery_Tibial:GTEx/v8/Breast_Mammary_Tissue:GTEx/v8/C…	NA	Yes	Promoter_anchored_loops:GM12878:IMR90:Mesenchymal_Stem_Cell	5.138e-21	rs2178198;rs78484886;rs4665963;rs780095;rs62131877;rs1659684;rs11693959;rs6744393;rs3792252;rs74446114;rs6758814;rs780095:rs4665963:rs11693959:rs2178198;rs78484886:rs62131877:rs780095;rs11693959:rs4665963;rs62131877:rs1659684:rs3792252;rs11693959:rs74446114;rs780095:rs6744393;rs3792252:rs3792252:rs6744393:rs2178198:rs74446114:rs78484886	9
ENSG00000115216	NRBP1	2	27650657	27665126	1	protein_coding	29959	NRBP1	0.999549	-1.38971	46	14.1	772	2.0735e-200	0	TIGER/Nom_Alonso_Pancreatic_islets:eQTLcatalogue/Alasoo_2018_ge_macrophage_IFNg_Salmonella:eQTLcatalogue/Alasoo_2018_ge_macrophage_IFNg:eQTLcatalogue/BLUEPRINT_ge_monocyte:eQTLcatalogue/Fairfax_2014_LPS2:eQTLcatalogue/Fairfax_2014_naive:eQTLcatalogue/GENCORD_ge_fibroblast:eQTLcatalogue/GENCORD_ge_LCL:eQTLcatalogue/GENCORD_ge_T-cell:eQTLcatalogue/GEUVADIS_ge_LCL:eQTLcatalogue/Lepik_2017_ge_blood:e…	NA	Yes	Promoter_anchored_loops:Adult_Cortex:Fetal_Cortex:Liver:GM12878:IMR90:Mesenchymal_Stem_Cell:Mesendoderm:Trophoblast-like_Cell:hESC	5.138e-21	rs4665963;rs780095;rs11693959;rs62131877;rs1659684;rs78484886;rs6744393;rs3792252;rs74446114;rs2178198;rs6758814;rs62131877:rs11693959:rs2178198;rs78484886:rs4665963;rs780095:rs1659684:rs4665963:rs780095;rs11693959:rs2178198:rs6744393;rs4665963:rs6744393:rs780095:rs6744393;rs3792252:rs3792252;rs11693959:rs74446114;rs780095:rs3792252:rs74446114:rs78484886:rs4665963	9
ENSG00000157992	KRTCAP3	2	27665233	27669348	1	protein_coding	200634	KRTCAP3	0.0445235	NA	29	10.57	702	1.9677e-238	0	TIGER/Nom_Alonso_Pancreatic_islets:eQTLcatalogue/BLUEPRINT_ge_T-cell:eQTLcatalogue/Lepik_2017_ge_blood:PsychENCODE_eQTLs:DICE/T_CD4_naive:DICE/T_CD4_naive_activated:DICE/T_CD8_naive:DICE/T_CD8_naive_activated:DICE/T_CD4_TH17:DICE/T_CD4_TH1_17:eQTLGen_cis_eQTLs:BIOSQTL/BIOS_eQTL_geneLevel:GTEx/v8/Adipose_Visceral_Omentum:GTEx/v8/Adrenal_Gland:GTEx/v8/Whole_Blood:GTEx/v8/Brain_Caudate_basal_ganglia…	NA	Yes	Promoter_anchored_loops:Liver:GM12878:IMR90:Mesenchymal_Stem_Cell:Mesendoderm:Trophoblast-like_Cell:hESC	5.138e-21	rs4665963;rs780095;rs11693959;rs1659684;rs62131877;rs78484886;rs6744393;rs3792252;rs74446114;rs6758814;rs2178198;rs62131877:rs4665963;rs780095:rs4665963;rs62131877:rs780095;rs11693959:rs4665963:rs11693959:rs2178198;rs78484886:rs78484886:rs1659684:rs74446114;rs780095:rs6744393;rs3792252:rs3792252:rs3792252;rs11693959:rs2178198:rs74446114:rs6744393:rs6744393;rs4665963:rs780095	9
ENSG00000138002	IFT172	2	27667238	27712656	-1	protein_coding	26160	IFT172	2.29012e-18	-0.505255	80	15.52	571	1.62811e-25	0	EyeGEx:eQTLcatalogue/BrainSeq_ge_brain:eQTLcatalogue/GEUVADIS_ge_LCL:eQTLcatalogue/HipSci_ge_iPSC:eQTLcatalogue/Quach_2016_ge_monocyte_IAV:eQTLcatalogue/Quach_2016_ge_monocyte_naive:PsychENCODE_eQTLs:DICE/T_CD4_TH1_17:DICE/T_CD4_memory_TREG:eQTLGen_cis_eQTLs:BIOSQTL/BIOS_eQTL_geneLevel:CMC_SVA_cis:GTEx/v8/Brain_Cerebellum:GTEx/v8/Brain_Cortex:GTEx/v8/Muscle_Skeletal:GTEx/v8/Cells_Cultured_fibrobl…	NA	Yes	Promoter_anchored_loops:Adult_Cortex:Fetal_Cortex:Left_Ventricle:Liver:GM12878:IMR90:Mesenchymal_Stem_Cell:Mesendoderm:Trophoblast-like_Cell:hESC	5.138e-21	rs1659684;rs4665963;rs780095;rs62131877;rs78484886;rs6744393;rs11693959;rs2178198;rs3792252;rs74446114;rs6758814;rs780095:rs4665963;rs11693959:rs1659684:rs3792252;rs11693959:rs74446114;rs780095:rs6744393;rs3792252:rs4665963:rs11693959:rs62131877:rs780095;rs11693959:rs3792252:rs2178198:rs74446114:rs2178198;rs78484886:rs6744393:rs4665963;rs62131877:rs78484886:rs6744393;rs4665963:rs780095:rs2178198;…	9
ENSG00000115226	FNDC4	2	27714750	27718112	-1	protein_coding	64838	FNDC4	0.759219	NA	28	15.52	673	2.69943e-31	2.50328e-25	TIGER/Nom_Alonso_Pancreatic_islets:EyeGEx:GTEx/v8/Adipose_Subcutaneous:GTEx/v8/Muscle_Skeletal:GTEx/v8/Small_Intestine_Terminal_Ileum:GTEx/v8/Spleen:GTEx/v8/Thyroid:GTEx/v7/Artery_Tibial:GTEx/v7/Muscle_Skeletal:GTEx/v7/Spleen:GTEx/v7/Thyroid:GTEx/v6/Spleen:GTEx/v6/Thyroid	NA	Yes	Promoter_anchored_loops:Adult_Cortex:Fetal_Cortex:Left_Ventricle:Liver:GM12878:IMR90:Mesenchymal_Stem_Cell:Mesendoderm:Trophoblast-like_Cell:hESC	5.138e-21	rs4665963;rs780095;rs62131877;rs2178198;rs6744393;rs3792252;rs11693959;rs78484886;rs74446114;rs6758814;rs780095:rs4665963;rs11693959:rs1659684:rs3792252;rs11693959:rs74446114;rs780095:rs6744393;rs3792252:rs4665963:rs11693959:rs62131877:rs780095;rs11693959:rs3792252:rs2178198:rs74446114:rs2178198;rs78484886:rs6744393:rs4665963;rs62131877:rs78484886:rs6744393;rs4665963:rs780095:rs2178198;rs6758814:…	9
ENSG00000084734	GCKR	2	27719709	27746554	1	protein_coding	2646	GCKR	3.58393e-16	-0.155698	77	15.52	357	8.14367e-26	2.34269e-20	DICE/T_CD4_TH1_17:GTEx/v8/Whole_Blood:GTEx/v8/Muscle_Skeletal:GTEx/v8/Ovary:GTEx/v8/Skin_Not_Sun_Exposed_Suprapubic:GTEx/v8/Spleen:GTEx/v8/Thyroid:GTEx/v7/Muscle_Skeletal:GTEx/v7/Spleen:GTEx/v7/Thyroid:GTEx/v6/Spleen:GTEx/v6/Thyroid	NA	Yes	Promoter_anchored_loops:Adult_Cortex:Fetal_Cortex:Left_Ventricle:Liver:GM12878:IMR90:Mesenchymal_Stem_Cell:Mesendoderm:Trophoblast-like_Cell:hESC	5.138e-21	rs4665963;rs780095;rs62131877;rs2178198;rs6744393;rs1659684;rs11693959;rs3792252;rs74446114;rs6758814;rs78484886;rs780095:rs4665963;rs11693959:rs1659684:rs3792252;rs11693959:rs74446114;rs780095:rs6744393;rs3792252:rs4665963:rs11693959:rs62131877:rs780095;rs11693959:rs2178198;rs78484886:rs78484886:rs6744393;rs4665963:rs3792252:rs2178198:rs74446114:rs6744393:rs4665963;rs62131877:rs780095:rs2178198;…	9
ENSG00000233438	AC109829.1	2	27760253	27790011	1	protein_coding	NA	NA	NA	NA	71	14.03	0	NA	NA	NA	NA	Yes	IMR90:Mesenchymal_Stem_Cell:Mesendoderm:Trophoblast-like_Cell:hESC	5.138e-21	rs780095;rs6744393;rs3792252;rs74446114;rs11693959;rs62131877;rs4665963;rs78484886;rs62131877:rs11693959:rs4665963:rs4665963;rs780095:rs780095;rs11693959:rs62131877:rs2178198;rs78484886:rs1659684:rs4665963;rs11693959:rs78484886:rs6744393;rs4665963:rs2178198:rs6744393:rs780095:rs6744393;rs3792252:rs3792252:rs74446114;rs780095:rs3792252;rs11693959:rs74446114	9
ENSG00000221843	C2orf16	2	27799389	27805588	1	protein_coding	84226	C2orf16	3.91662e-17	-0.329747	32	17.52	323	2.02566e-09	2.05669e-06	TIGER/Nom_Alonso_Pancreatic_islets:PsychENCODE_eQTLs:BIOSQTL/BIOS_eQTL_geneLevel:CMC_SVA_cis:GTEx/v8/Liver:GTEx/v8/Spleen:GTEx/v8/Thyroid:GTEx/v7/Thyroid	NA	Yes	IMR90:Mesenchymal_Stem_Cell:Mesendoderm:Trophoblast-like_Cell:hESC	5.138e-21	rs6744393;rs3792252;rs62131877;rs74446114;rs780095;rs78484886;rs11693959;rs4665963;rs62131877:rs11693959:rs4665963:rs4665963;rs780095:rs780095;rs11693959:rs62131877:rs2178198;rs78484886:rs1659684:rs4665963;rs11693959:rs78484886:rs6744393;rs4665963:rs2178198:rs6744393:rs780095:rs6744393;rs3792252:rs3792252:rs74446114;rs780095:rs3792252;rs11693959:rs74446114	9
ENSG00000243943	ZNF512	2	27805897	27858041	1	protein_coding	84450	ZNF512	0.949147	-1.27925	113	18.65	222	1.8945e-07	0.000624064	PsychENCODE_eQTLs:eQTLGen_cis_eQTLs:GTEx/v8/Artery_Tibial:GTEx/v8/Esophagus_Gastroesophageal_Junction:GTEx/v8/Skin_Not_Sun_Exposed_Suprapubic:GTEx/v8/Thyroid:GTEx/v7/Artery_Tibial	NA	Yes	Promoter_anchored_loops:Adult_Cortex:Fetal_Cortex:Liver:GM12878:IMR90:Mesenchymal_Stem_Cell:Mesendoderm:Trophoblast-like_Cell:hESC	5.138e-21	rs78484886;rs6744393;rs3792252;rs11693959;rs74446114;rs780095;rs4665963;rs62131877;rs2178198;rs78484886:rs4665963;rs780095:rs62131877:rs4665963:rs2178198:rs11693959:rs780095;rs11693959:rs6744393;rs4665963:rs74446114;rs780095:rs6744393;rs3792252:rs3792252:rs3792252;rs11693959:rs4665963;rs62131877:rs2178198;rs78484886:rs1659684:rs4665963;rs11693959:rs74446114:rs6744393:rs780095:rs6758814	9
ENSG00000176714	CCDC121	2	27848506	27851879	-1	protein_coding	79635	CCDC121	9.72714e-05	-0.266319	36	18.65	34	6.50389e-06	0.0109349	eQTLcatalogue/Fairfax_2012_B-cell_CD19:CMC_SVA_cis:GTEx/v7/Artery_Tibial	NA	Yes	Promoter_anchored_loops:Left_Ventricle:Liver:GM12878:IMR90:Mesenchymal_Stem_Cell:Mesendoderm:Trophoblast-like_Cell:hESC	5.138e-21	rs6744393;rs3792252;rs74446114;rs780095;rs4665963;rs11693959;rs2178198;rs62131877;rs6758814;rs780095:rs78484886:rs6744393;rs4665963:rs11693959:rs62131877:rs2178198:rs4665963:rs4665963;rs62131877:rs780095;rs11693959:rs2178198;rs78484886:rs1659684:rs4665963;rs11693959:rs3792252;rs11693959:rs74446114;rs780095:rs6744393;rs3792252:rs3792252:rs6744393:rs74446114:rs780095:rs2178198;rs6758814:rs3792252;r…	9
ENSG00000198522	GPN1	2	27851114	27874375	1	protein_coding	11321	GPN1	0.00490359	-0.238155	45	14.13	728	1.208e-52	0	TIGER/Nom_Alonso_Pancreatic_islets:Nom_InsPIRE_Islets_Gene_eQTLs_Nominal_Pvalues:eQTLcatalogue/BLUEPRINT_ge_monocyte:eQTLcatalogue/BLUEPRINT_ge_neutrophil:eQTLcatalogue/CEDAR_B-cell_CD19:eQTLcatalogue/CEDAR_neutrophil_CD15:eQTLcatalogue/CEDAR_T-cell_CD4:eQTLcatalogue/GEUVADIS_ge_LCL:eQTLcatalogue/HipSci_ge_iPSC:eQTLcatalogue/Nedelec_2016_ge_macrophage_naive:eQTLcatalogue/Quach_2016_ge_monocyte_IA…	NA	Yes	Promoter_anchored_loops:Left_Ventricle:Liver:GM12878:IMR90:Mesenchymal_Stem_Cell:Mesendoderm:Trophoblast-like_Cell:hESC	5.138e-21	rs3792252;rs6744393;rs4665963;rs11693959;rs2178198;rs62131877;rs74446114;rs780095;rs78484886;rs1659684;rs6758814;rs780095:rs78484886:rs6744393;rs4665963:rs11693959:rs62131877:rs2178198:rs4665963:rs4665963;rs62131877:rs780095;rs11693959:rs2178198;rs78484886:rs1659684:rs4665963;rs11693959:rs3792252;rs11693959:rs74446114;rs780095:rs6744393;rs3792252:rs3792252:rs6744393:rs74446114:rs780095:rs2178198;…	9
ENSG00000119760	SUPT7L	2	27873679	27886676	-1	protein_coding	9913	SUPT7L	0.833193	-0.966219	21	12.86	436	3.2639e-36	0	PsychENCODE_eQTLs:eQTLGen_cis_eQTLs:BIOSQTL/BIOS_eQTL_geneLevel:CMC_SVA_cis:GTEx/v8/Esophagus_Mucosa:GTEx/v8/Cells_Cultured_fibroblasts	NA	Yes	Promoter_anchored_loops:Adult_Cortex:Fetal_Cortex:GM12878:IMR90	5.138e-21	rs6744393;rs3792252;rs62131877;rs74446114;rs780095;rs11693959;rs2178198;rs78484886;rs4665963;rs1659684;rs2178198:rs4665963:rs4665963;rs62131877:rs62131877:rs4665963;rs780095:rs11693959:rs4665963;rs11693959:rs2178198;rs78484886:rs1659684:rs780095;rs11693959:rs78484886:rs6744393;rs4665963:rs6744393:rs780095:rs6744393;rs3792252:rs3792252:rs74446114;rs780095:rs3792252;rs11693959:rs74446114:rs2178198;…	9
ENSG00000163798	SLC4A1AP	2	27886338	27917840	1	protein_coding	22950	SLC4A1AP	7.73999e-07	-0.546764	17	15.03	675	2.2077e-48	0	TIGER/Nom_Alonso_Pancreatic_islets:EyeGEx:eQTLcatalogue/Alasoo_2018_ge_macrophage_Salmonella:eQTLcatalogue/BLUEPRINT_ge_monocyte:eQTLcatalogue/BLUEPRINT_ge_neutrophil:eQTLcatalogue/BLUEPRINT_ge_T-cell:eQTLcatalogue/BrainSeq_ge_brain:eQTLcatalogue/GENCORD_ge_LCL:eQTLcatalogue/GEUVADIS_ge_LCL:eQTLcatalogue/Lepik_2017_ge_blood:eQTLcatalogue/Nedelec_2016_ge_macrophage_Listeria:eQTLcatalogue/Nedelec_2…	NA	Yes	Promoter_anchored_loops:Adult_Cortex:Fetal_Cortex:GM12878:IMR90	5.138e-21	rs2178198;rs78484886;rs6744393;rs3792252;rs11693959;rs74446114;rs780095;rs62131877;rs4665963;rs1659684;rs6758814;rs2178198:rs4665963:rs4665963;rs62131877:rs62131877:rs4665963;rs780095:rs11693959:rs4665963;rs11693959:rs2178198;rs78484886:rs1659684:rs780095;rs11693959:rs78484886:rs6744393;rs4665963:rs6744393:rs780095:rs6744393;rs3792252:rs3792252:rs74446114;rs780095:rs3792252;rs11693959:rs74446114:…	9
ENSG00000205334	AC074091.13	2	27928653	27938599	-1	protein_coding	NA	NA	NA	NA	16	18.44	299	2.37095e-07	0.00118548	eQTLcatalogue/HipSci_ge_iPSC:GTEx/v8/Artery_Aorta:GTEx/v8/Muscle_Skeletal:GTEx/v8/Nerve_Tibial:GTEx/v8/Skin_Sun_Exposed_Lower_leg:GTEx/v7/Muscle_Skeletal:GTEx/v7/Nerve_Tibial:GTEx/v6/Nerve_Tibial	NA	Yes	Promoter_anchored_loops:EP_correlation_organ_oneway:Adult_Cortex:Aorta:Left_Ventricle:Liver:Right_Ventricle:Spleen:IMR90:Mesenchymal_Stem_Cell:Mesendoderm:Trophoblast-like_Cell:hESC	1.763e-19	rs3792252;rs11693959;rs74446114;rs780095;rs6744393;rs4665963;rs62131877;rs6758814;rs2178198:rs4665963:rs6744393;rs3792252:rs3792252:rs6758814:rs74446114:rs11693959:rs2178198;rs6758814:rs3792252;rs6758814:rs2178198;rs78484886:rs6744393:rs74446114	9
ENSG00000243147	MRPL33	2	27994584	28210954	1	protein_coding	9553	MRPL33	0.749165	-0.22013	223	19.66	391	1.6199e-41	0	TIGER/Nom_Alonso_Pancreatic_islets:eQTLcatalogue/Fairfax_2012_B-cell_CD19:DICE/T_CD8_naive:eQTLGen_cis_eQTLs:GTEx/v8/Adipose_Visceral_Omentum:GTEx/v8/Esophagus_Muscularis:GTEx/v8/Heart_Atrial_Appendage:GTEx/v8/Lung:GTEx/v8/Muscle_Skeletal:GTEx/v8/Nerve_Tibial:GTEx/v8/Testis:GTEx/v7/Adipose_Visceral_Omentum:GTEx/v7/Heart_Atrial_Appendage:GTEx/v6/Heart_Atrial_Appendage:GTEx/v6/Muscle_Skeletal:GTEx/…	NA	Yes	Adult_Cortex:Bladder:Left_Ventricle:IMR90:Mesenchymal_Stem_Cell:Mesendoderm	5.138e-21	rs3792252;rs74446114;rs6744393;rs4665963;rs11693959;rs2178198;rs78484886;rs780095;rs62131877;rs6758814;rs11693959:rs74446114;rs780095:rs6744393;rs3792252:rs3792252:rs4665963:rs6758814:rs2178198:rs11693959:rs2178198;rs6758814:rs3792252;rs6758814:rs62131877:rs74446114:rs6744393:rs74446114;rs3792252:rs2178198	9
ENSG00000268656	AC110084.1	2	27998851	28009186	-1	protein_coding	NA	NA	NA	NA	21	19.66	0	NA	NA	NA	NA	Yes	Promoter_anchored_loops:Left_Ventricle:Liver:IMR90:Mesenchymal_Stem_Cell:Mesendoderm:Trophoblast-like_Cell:hESC	2.521e-19	rs3792252;rs6744393;rs74446114;rs4665963;rs62131877:rs4665963;rs780095:rs780095:rs6744393:rs780095;rs11693959:rs11693959:rs3792252:rs2178198:rs3792252;rs11693959:rs74446114;rs780095:rs6744393;rs3792252:rs4665963:rs2178198;rs6758814:rs3792252;rs6758814:rs6758814:rs74446114:rs2178198;rs78484886:rs74446114	9
ENSG00000171174	RBKS	2	28004231	28113965	-1	protein_coding	64080	RBKS	1.93198e-05	-0.689745	146	19.66	244	1.4752e-15	0	eQTLcatalogue/HipSci_ge_iPSC:eQTLGen_cis_eQTLs:GTEx/v8/Lung:GTEx/v8/Nerve_Tibial:GTEx/v8/Thyroid:GTEx/v7/Thyroid	NA	Yes	EP_correlation_cell_type_oneway:Aorta:Left_Ventricle:Liver:IMR90:Mesenchymal_Stem_Cell:Mesendoderm:Trophoblast-like_Cell:hESC	1.03e-15	rs3792252;rs74446114;rs4665963;rs11693959;rs2178198;rs6744393;rs6758814;rs780095;rs3792252:rs2178198:rs74446114:rs11693959:rs2178198;rs6758814:rs3792252;rs6758814:rs6758814:rs3792252;rs11693959:rs74446114;rs780095:rs6744393;rs3792252:rs4665963:rs62131877:rs2178198;rs78484886:rs74446114	9
ENSG00000158019	BRE	2	28112808	28561768	1	protein_coding	9577	BRE	0.279976	NA	226	18.95	72	6.3753e-12	0	eQTLcatalogue/Fairfax_2014_LPS2:eQTLGen_cis_eQTLs:GTEx/v8/Cells_Cultured_fibroblasts:GTEx/v8/Skin_Not_Sun_Exposed_Suprapubic:GTEx/v8/Testis:GTEx/v8/Thyroid:GTEx/v7/Thyroid	NA	Yes	EP_correlation_organ_oneway:Aorta:Left_Ventricle:Liver:IMR90:Mesenchymal_Stem_Cell:Mesendoderm:Trophoblast-like_Cell:hESC	1.03e-15	rs3792252;rs2178198;rs11693959;rs74446114;rs78484886;rs6758814;rs780095;rs2178198:rs3792252:rs74446114:rs11693959:rs2178198;rs6758814:rs3792252;rs6758814:rs6758814:rs3792252;rs11693959:rs74446114;rs780095:rs6744393;rs3792252:rs4665963:rs62131877:rs2178198;rs78484886:rs74446114	9
ENSG00000163803	PLB1	2	28680012	28866654	1	protein_coding	151056	PLB1	1.99315e-56	0.411384	0	0	23	5.2389e-09	3.23227e-05	eQTLGen_cis_eQTLs	NA	Yes	Promoter_anchored_loops:Aorta:Left_Ventricle:Liver:Right_Ventricle:Spleen:GM12878:IMR90:Mesenchymal_Stem_Cell:Mesendoderm:Neural_Progenitor_Cell:Trophoblast-like_Cell:hESC	5.138e-21	rs3792252;rs11693959;rs6758814;rs11693959:rs74446114;rs780095:rs6744393;rs3792252:rs4665963:rs3792252:rs2178198:rs74446114:rs11693959:rs62131877:rs6744393:rs2178198;rs78484886:rs2178198;rs6758814:rs3792252;rs6758814:rs4665963;rs780095:rs78484886:rs780095:rs74446114;rs3792252:rs6758814:rs6744393;rs4665963:rs1659684:rs780095	9
ENSG00000163811	WDR43	2	29117509	29171088	1	protein_coding	23160	WDR43	0.998942	1.45511	0	0	6	2.31424e-05	0.0452071	DICE/T_CD4_naive:GTEx/v7/Testis	NA	Yes	Fetal_Cortex:IMR90:Mesenchymal_Stem_Cell	1.254e-14	rs3792252;rs74446114;rs6758814;rs6744393;rs3792252:rs3792252:rs3792252;rs11693959:rs74446114;rs780095:rs4665963:rs62131877	9
ENSG00000115828	QPCT	2	37571717	37600465	1	protein_coding	25797	QPCT	1.87383e-08	0.303395	0	0	5	1.2409e-06	0.00988476	eQTLGen_trans_eQTLs	NA	No	NA	1.724e-08	rs2385114;rs174547	1 day, 6:39:00
ENSG00000138061	CYP1B1	2	38294116	38337044	-1	protein_coding	1545	CYP1B1	0.000296476	-1.04128	0	0	3	4.1405e-06	0.0282399	eQTLGen_trans_eQTLs	NA	No	NA	NA	rs4738080;rs3858704	1 day, 3:45:00
ENSG00000143924	EML4	2	42396490	42559688	1	protein_coding	27436	EML4	0.391139	-0.822993	0	0	2	1.5584e-06	0.0121511	eQTLGen_trans_eQTLs	NA	No	NA	NA	rs3858704	45
ENSG00000162881	OXER1	2	42989642	42991401	-1	protein_coding	165140	OXER1	4.76881e-07	0.339145	0	0	8	8.0643e-12	0	eQTLGen_trans_eQTLs	NA	No	NA	0.003258	rs3858704	45
ENSG00000138032	PPM1B	2	44395108	44471523	1	protein_coding	5495	PPM1B	0.109621	NA	0	0	8	NA	0.049	CMC_NoSVA_cis	NA	No	NA	3.924e-15	rs340515;rs10168523	10
ENSG00000143919	CAMKMT	2	44589089	44999731	1	protein_coding	79823	CAMKMT	5.14966e-13	0.21332	0	0	1	1.3392e-05	0.0374371	eQTLGen_cis_eQTLs	NA	Yes	Adult_Cortex:Fetal_Cortex:IMR90:Mesenchymal_Stem_Cell:Mesendoderm:Trophoblast-like_Cell:hESC	9.872e-20	rs504675;rs340515:rs55712520:rs10168523:rs340515;rs55712520:rs340515;rs10168523:rs504675:rs168096:rs168096	10
ENSG00000138083	SIX3	2	45168902	45173216	1	protein_coding	6496	SIX3	0.348879	-0.0446603	18	15.13	57	5.48385e-24	2.90161e-10	TIGER/Nom_Alonso_Pancreatic_islets:Nom_InsPIRE_Islets_Gene_eQTLs_Nominal_Pvalues:EyeGEx:GTEx/v8/Breast_Mammary_Tissue:GTEx/v8/Pancreas:GTEx/v8/Skin_Not_Sun_Exposed_Suprapubic:GTEx/v7/Pancreas	NA	No	NA	3.924e-15	rs504675;rs168096;rs55712520;rs340515;rs10168523	10
ENSG00000170577	SIX2	2	45232300	45236569	-1	protein_coding	10736	SIX2	0.870283	NA	0	0	18	1.628e-10	1.3129e-08	TIGER/Nom_Alonso_Pancreatic_islets:Nom_InsPIRE_Islets_Gene_eQTLs_Nominal_Pvalues:EyeGEx	NA	Yes	Fetal_Cortex:Spleen	9.872e-20	rs340515;rs10168523;rs55712520;rs340515:rs55712520:rs10168523:rs340515;rs55712520:rs340515;rs10168523:rs168096:rs168096;rs504675:rs504675	10
ENSG00000068784	SRBD1	2	45615819	45839304	-1	protein_coding	55133	SRBD1	1.67463e-14	-0.600982	0	0	9	1.2589e-16	0	eQTLGen_trans_eQTLs	NA	No	NA	0.003258	rs3858704	45
ENSG00000068724	TTC7A	2	47143296	47303276	1	protein_coding	57217	TTC7A	1.9562e-09	0.00572038	0	0	7	8.4016e-07	0.00707622	eQTLGen_trans_eQTLs	NA	No	NA	0.003258	rs3858704	45
ENSG00000119866	BCL11A	2	60678302	60780702	-1	protein_coding	53335	BCL11A	0.829	-2.0339	0	0	8	6.0127e-19	0	eQTLGen_trans_eQTLs	NA	No	NA	0.003258	rs3858704	45
ENSG00000179833	SERTAD2	2	64858755	64978139	-1	protein_coding	9792	SERTAD2	0.736975	-0.658829	0	0	8	5.0126e-17	0	eQTLGen_trans_eQTLs	NA	No	NA	0.003258	rs3858704	45
ENSG00000196975	ANXA4	2	69871557	70053596	1	protein_coding	307	ANXA4	0.000342407	-0.283816	0	0	4	1.0084e-06	0.00825449	eQTLGen_trans_eQTLs	NA	No	NA	NA	rs3858704	45
ENSG00000059728	MXD1	2	70124820	70170077	1	protein_coding	4084	MXD1	0.388108	-1.47187	0	0	4	1.9378e-06	0.0148511	eQTLGen_trans_eQTLs	NA	No	NA	NA	rs3858704	45
ENSG00000244617	ASPRV1	2	70187226	70189397	-1	protein_coding	151516	ASPRV1	0.0918053	0.401715	0	0	2	2.0727e-06	0.0159689	eQTLGen_trans_eQTLs	NA	No	NA	NA	rs55823486	59
ENSG00000135636	DYSF	2	71680852	71913898	1	protein_coding	8291	DYSF	1.00255e-15	0.998737	0	0	7	4.1441e-08	0.000580654	eQTLGen_trans_eQTLs	NA	No	NA	0.003258	rs3858704	45
ENSG00000135631	RAB11FIP5	2	73300510	73383849	-1	protein_coding	26056	RAB11FIP5	0.00267592	0.325552	0	0	8	1.5773e-11	0	eQTLGen_trans_eQTLs	NA	No	NA	0.003258	rs3858704	45
ENSG00000168899	VAMP5	2	85811531	85820535	1	protein_coding	10791	VAMP5	0.0516197	0.554615	0	0	8	2.4065e-14	0	eQTLGen_trans_eQTLs	NA	No	NA	0.003258	rs3858704	45
ENSG00000153563	CD8A	2	87011729	87035519	-1	protein_coding	925	CD8A	0.0241811	-0.914487	0	0	7	2.4612e-10	0	eQTLGen_trans_eQTLs	NA	No	NA	NA	rs3858704	45
ENSG00000172005	MAL	2	95691422	95719737	1	protein_coding	4118	MAL	0.786079	-0.383388	0	0	10	3.1049e-22	0	eQTLGen_trans_eQTLs	NA	No	NA	0.003258	rs3858704	45
ENSG00000196872	KIAA1211L	2	99410309	99552722	-1	protein_coding	343990	KIAA1211L	NA	NA	0	0	8	3.5678e-11	0	eQTLGen_trans_eQTLs	NA	No	NA	0.003258	rs3858704	45
ENSG00000115604	IL18R1	2	102927989	103015218	1	protein_coding	8809	IL18R1	5.02098e-07	0.218567	0	0	8	2.8274e-08	0.000384445	eQTLGen_trans_eQTLs	NA	No	NA	0.003258	rs3858704	45
ENSG00000115607	IL18RAP	2	103035149	103069025	1	protein_coding	8807	IL18RAP	0.366507	0.797204	0	0	8	8.2703e-13	0	eQTLGen_trans_eQTLs	NA	No	NA	0.003258	rs3858704	45
ENSG00000144152	FBLN7	2	112895962	112945791	1	protein_coding	129804	FBLN7	1.57848e-05	NA	0	0	8	1.7848e-10	0	eQTLGen_trans_eQTLs	NA	No	NA	0.003258	rs3858704	45
ENSG00000144136	SLC20A1	2	113403434	113421404	1	protein_coding	6574	SLC20A1	0.725657	NA	0	0	8	4.238e-10	2.08377e-05	eQTLGen_trans_eQTLs	NA	No	NA	0.003258	rs3858704	45
ENSG00000088179	PTPN4	2	120517207	120741394	1	protein_coding	5775	PTPN4	0.999998	-1.39352	0	0	9	2.476e-13	0	eQTLGen_trans_eQTLs	NA	No	NA	0.003258	rs3858704	45
ENSG00000115919	KYNU	2	143635067	143799890	1	protein_coding	8942	KYNU	1.82769e-09	0.756469	0	0	1	3.193e-06	0.0228129	eQTLGen_trans_eQTLs	NA	No	NA	0.000547	rs1727307	46
ENSG00000169554	ZEB2	2	145141648	145282147	-1	protein_coding	9839	ZEB2	0.999834	-3.33245	0	0	7	7.6679e-09	0.000149975	eQTLGen_trans_eQTLs	NA	No	NA	0.003258	rs3858704	45
ENSG00000153234	NR4A2	2	157180944	157198860	-1	protein_coding	4929	NR4A2	0.991433	-1.28792	0	0	3	3.7787e-06	0.0263039	eQTLGen_trans_eQTLs	NA	No	NA	NA	rs3858704	45
ENSG00000115170	ACVR1	2	158592958	158732374	-1	protein_coding	90	ACVR1	0.956448	0.234303	0	0	6	2.2733e-08	0.00030248	eQTLGen_trans_eQTLs	NA	No	NA	NA	rs3858704	45
ENSG00000197635	DPP4	2	162848751	162931052	-1	protein_coding	1803	DPP4	4.05741e-10	-0.56917	0	0	8	8.733e-11	0	eQTLGen_trans_eQTLs	NA	No	NA	0.003258	rs3858704	45
ENSG00000082438	COBLL1	2	165510134	165700189	-1	protein_coding	22837	COBLL1	0.0121974	0.157057	0	0	8	8.2436e-09	0.000148933	eQTLGen_trans_eQTLs	NA	No	NA	0.003258	rs3858704	45
ENSG00000198648	STK39	2	168810530	169104651	-1	protein_coding	27347	STK39	0.999462	-1.27479	0	0	2	0.000106961	0.000959021	GTEx/v8/Artery_Tibial:GTEx/v8/Lung	NA	Yes	Fetal_Cortex:Mesenchymal_Stem_Cell	3.125e-06	rs60415045;rs138670924	11
ENSG00000172292	CERS6	2	169312372	169631644	1	protein_coding	253782	CERS6	0.684541	-0.789778	1	2.105	0	NA	NA	NA	NA	Yes	Adult_Cortex:Fetal_Cortex:Left_Ventricle:Right_Ventricle:GM12878:IMR90:Mesenchymal_Stem_Cell:Mesendoderm:Trophoblast-like_Cell:hESC	2.95e-14	rs138670924;rs138670924:rs60415045:rs60415045;rs567074:rs34177044;rs60415045:rs567074:rs34177044:rs60415045;rs567074;rs138670924:rs34177044;rs138670924:rs567074	11
ENSG00000163072	NOSTRIN	2	169643049	169722024	1	protein_coding	115677	NOSTRIN	3.57973e-10	-0.276311	57	14.48	149	3.9271e-36	3.68283e-29	TIGER/Nom_Alonso_Pancreatic_islets:eQTLcatalogue/CEDAR_ileum:eQTLcatalogue/CEDAR_rectum:eQTLcatalogue/CEDAR_transverse_colon:eQTLcatalogue/GENCORD_ge_LCL:eQTLcatalogue/GENCORD_ge_T-cell:eQTLcatalogue/GEUVADIS_ge_LCL:eQTLcatalogue/TwinsUK_ge_fat:eQTLcatalogue/TwinsUK_ge_LCL:eQTLcatalogue/TwinsUK_ge_skin:PsychENCODE_eQTLs:CMC_SVA_cis:CMC_NoSVA_cis:GTEx/v8/Adipose_Subcutaneous:GTEx/v8/Adipose_Viscer…	NA	Yes	Left_Ventricle:Liver:IMR90:Mesenchymal_Stem_Cell:Mesendoderm:Trophoblast-like_Cell:hESC	2.95e-14	rs138670924;rs60415045;rs567074;rs34177044;rs138670924:rs567074:rs60415045:rs34177044;rs138670924:rs34177044:rs60415045;rs567074:rs34177044;rs60415045:rs60415045;rs138670924:rs567074;rs138670924:rs34177044	11
ENSG00000152253	SPC25	2	169690642	169769881	-1	protein_coding	57405	SPC25	0.0594295	-0.350387	113	16.89	133	1.8224e-68	1.67047e-63	TIGER/Nom_Alonso_Pancreatic_islets:EyeGEx:eQTLcatalogue/BrainSeq_ge_brain:eQTLcatalogue/TwinsUK_ge_fat:eQTLcatalogue/TwinsUK_ge_skin:PsychENCODE_eQTLs:eQTLGen_cis_eQTLs:CMC_NoSVA_cis:GTEx/v8/Adipose_Subcutaneous:GTEx/v8/Adipose_Visceral_Omentum:GTEx/v8/Adrenal_Gland:GTEx/v8/Artery_Aorta:GTEx/v8/Artery_Coronary:GTEx/v8/Artery_Tibial:GTEx/v8/Brain_Cerebellum:GTEx/v8/Brain_Cortex:GTEx/v8/Brain_Putam…	NA	Yes	Adult_Cortex:Fetal_Cortex:Left_Ventricle:Liver:IMR90:Mesenchymal_Stem_Cell:Mesendoderm:Trophoblast-like_Cell:hESC	2.95e-14	rs138670924;rs60415045;rs567074;rs34177044;rs138670924:rs60415045:rs567074:rs34177044:rs60415045;rs138670924:rs60415045;rs567074:rs567074	11
ENSG00000152254	G6PC2	2	169757750	169766505	1	protein_coding	57818	G6PC2	1.91256e-09	0.433903	37	16.89	157	3.80989e-60	2.10265e-83	TIGER/Nom_Alonso_Pancreatic_islets:Nom_InsPIRE_Islets_Gene_eQTLs_Nominal_Pvalues:eQTLcatalogue/TwinsUK_ge_skin:GTEx/v8/Adipose_Subcutaneous:GTEx/v8/Adipose_Visceral_Omentum:GTEx/v8/Breast_Mammary_Tissue:GTEx/v8/Colon_Sigmoid:GTEx/v8/Colon_Transverse:GTEx/v8/Kidney_Cortex:GTEx/v8/Lung:GTEx/v8/Nerve_Tibial:GTEx/v8/Ovary:GTEx/v8/Pancreas:GTEx/v8/Prostate:GTEx/v8/Minor_Salivary_Gland:GTEx/v8/Skin_Not…	NA	Yes	Left_Ventricle:IMR90:Mesenchymal_Stem_Cell:Mesendoderm:Trophoblast-like_Cell:hESC	2.95e-14	rs138670924;rs60415045;rs567074;rs34177044;rs138670924:rs567074:rs60415045:rs34177044;rs138670924:rs34177044:rs60415045;rs567074:rs34177044;rs60415045:rs60415045;rs138670924:rs567074;rs138670924:rs34177044	11
ENSG00000073734	ABCB11	2	169779448	169887832	-1	protein_coding	8647	ABCB11	2.18849e-10	0.00723912	102	15.52	2	0.00034326	0.0241875	PsychENCODE_eQTLs	NA	Yes	Mesenchymal_Stem_Cell:Mesendoderm:Trophoblast-like_Cell:hESC	7.515e-14	rs60415045;rs567074;rs34177044;rs138670924;rs138670924:rs567074:rs60415045;rs567074:rs567074;rs138670924:rs138670924:rs60415045:rs34177044;rs138670924:rs34177044:rs34177044;rs60415045:rs34177044	11
ENSG00000073737	DHRS9	2	169921299	169952677	1	protein_coding	10170	DHRS9	2.60804e-07	0.131292	0	0	63	8.2921e-14	0	eQTLGen_cis_eQTLs:eQTLGen_trans_eQTLs:GTEx/v7/Artery_Tibial	NA	Yes	Left_Ventricle:Liver:IMR90:Mesenchymal_Stem_Cell:Mesendoderm:Trophoblast-like_Cell:hESC	7.515e-14	rs60415045;rs567074;rs138670924;rs3858704;rs3803300;rs138670924:rs567074:rs60415045;rs567074:rs567074;rs138670924:rs138670924:rs60415045:rs34177044;rs138670924:rs34177044:rs34177044;rs60415045:rs34177044	11:45:48
ENSG00000239474	KLHL41	2	170366212	170382772	1	protein_coding	10324	KLHL41	0.018812	0.171041	0	0	5	7.2608e-07	0.0036304	eQTLcatalogue/CEDAR_T-cell_CD8	NA	No	NA	3.128e-07	rs138670924	11
ENSG00000138399	FASTKD1	2	170386259	170430385	-1	protein_coding	79675	FASTKD1	1.65436e-12	0.0668276	0	0	1	1.28523e-05	0.0457335	GTEx/v7/Breast_Mammary_Tissue	NA	No	NA	4.193e-05	rs138670924	11
ENSG00000154479	CCDC173	2	170501935	170550943	-1	protein_coding	129881	CCDC173	1.08459e-15	0.321339	0	0	1	0.000137542	0.0366324	BRAINEAC/OCTX	NA	No	NA	NA	rs138670924	11
ENSG00000071967	CYBRD1	2	172378757	172414643	1	protein_coding	79901	CYBRD1	0.351788	2.29122	0	0	1	1.4794e-06	0.0115767	eQTLGen_trans_eQTLs	NA	No	NA	3.129e-09	rs2285626;rs7249692	59
ENSG00000144354	CDCA7	2	174219548	174233725	1	protein_coding	83879	CDCA7	0.141955	0.582754	0	0	8	4.3162e-08	0.000592718	eQTLGen_trans_eQTLs	NA	No	NA	0.003258	rs3858704	45
ENSG00000128656	CHN1	2	175664091	175870097	-1	protein_coding	1123	CHN1	0.837424	NA	0	0	1	3.6993e-06	0.0258082	eQTLGen_trans_eQTLs	NA	No	NA	1.964e-07	rs55931203	54
ENSG00000187699	C2orf88	2	190744335	191068210	1	protein_coding	84281	C2orf88	0.0235885	-0.923407	0	0	1	1.6268e-07	0.00161685	eQTLGen_trans_eQTLs	NA	No	NA	NA	rs2285626;rs12979148;rs7249692	59
ENSG00000151689	INPP1	2	191208196	191236391	1	protein_coding	3628	INPP1	0.000237352	NA	0	0	2	6.8467e-06	0.0426149	eQTLGen_trans_eQTLs	NA	No	NA	NA	rs3858704	45
ENSG00000115415	STAT1	2	191829084	191885686	-1	protein_coding	6772	STAT1	0.999994	-0.650494	0	0	12	5.2585e-64	0	eQTLGen_trans_eQTLs	NA	No	NA	1.572e-11	rs2078847;rs2040571;rs3858704	45
ENSG00000138378	STAT4	2	191894302	192016322	-1	protein_coding	6775	STAT4	0.988868	-0.393433	0	0	8	5.7173e-14	0	eQTLGen_trans_eQTLs	NA	No	NA	0.003258	rs3858704	45
ENSG00000168497	SDPR	2	192699028	192711981	-1	protein_coding	8436	SDPR	0.000704633	-0.634204	0	0	1	3.5307e-09	0.000107047	eQTLGen_trans_eQTLs	NA	No	NA	0.01301	rs3858704	45
ENSG00000196141	SPATS2L	2	201170604	201346986	1	protein_coding	26010	SPATS2L	0.970345	0.539346	0	0	7	2.5857e-08	0.000358423	eQTLGen_trans_eQTLs	NA	No	NA	0.003258	rs3858704	45
ENSG00000138375	SMARCAL1	2	217277137	217347776	1	protein_coding	50485	SMARCAL1	0.000314359	-0.0377141	0	0	1	8.2113e-06	0.0494478	eQTLGen_trans_eQTLs	NA	No	NA	0.01221	rs28489907	14
ENSG00000127838	PNKD	2	219135115	219211516	1	protein_coding	25953	PNKD	1.89916e-08	-0.259913	0	0	1	1.5693e-06	0.0123042	eQTLGen_trans_eQTLs	NA	No	NA	NA	rs2245019	28
ENSG00000135929	CYP27A1	2	219646472	219680016	1	protein_coding	1593	CYP27A1	3.89682e-11	-1.07572	0	0	3	2.5299e-08	0.000329292	eQTLGen_trans_eQTLs	NA	No	NA	0.0003373	rs4738080;rs174547	1 day, 3:39:00
ENSG00000116106	EPHA4	2	222282747	222438922	-1	protein_coding	2043	EPHA4	0.999891	0.650039	0	0	2	5.038e-06	0.0331214	eQTLGen_trans_eQTLs	NA	No	NA	3.129e-09	rs2285626;rs12979148;rs7249692	59
ENSG00000085449	WDFY1	2	224720433	224810104	-1	protein_coding	57590	WDFY1	1.68817e-05	0.334731	0	0	1	5.1594e-06	0.0336789	eQTLGen_trans_eQTLs	NA	No	NA	NA	rs3858704	45
ENSG00000135919	SERPINE2	2	224839829	224904036	-1	protein_coding	5270	SERPINE2	0.643024	NA	0	0	4	1.6381e-06	0.0127379	eQTLGen_trans_eQTLs	NA	No	NA	NA	rs3858704	45
ENSG00000135905	DOCK10	2	225629807	225907162	-1	protein_coding	55619	DOCK10	0.0291925	NA	0	0	8	3.0996e-13	0	eQTLGen_trans_eQTLs	NA	No	NA	0.003258	rs3858704	45
ENSG00000135932	CAB39	2	231577560	231685790	1	protein_coding	51719	CAB39	0.0621796	0.453195	0	0	5	2.6838e-07	0.00258273	eQTLGen_trans_eQTLs	NA	No	NA	NA	rs3858704	45
ENSG00000135916	ITM2C	2	231729354	231743963	1	protein_coding	81618	ITM2C	0.20853	-0.546813	0	0	4	3.3573e-07	0.00305608	eQTLGen_trans_eQTLs	NA	No	NA	NA	rs3858704	45
ENSG00000130147	SH3BP4	2	235860617	235964358	1	protein_coding	23677	SH3BP4	0.0809644	-0.44566	0	0	1	6.716e-07	0.00583231	eQTLGen_trans_eQTLs	NA	No	NA	NA	rs2245019	28
ENSG00000124831	LRRFIP1	2	238536219	238722325	1	protein_coding	9208	LRRFIP1	0.365512	NA	0	0	9	5.9127e-14	0	eQTLGen_trans_eQTLs	NA	No	NA	0.003258	rs3858704	45
ENSG00000178752	FAM132B	2	239067623	239077541	1	protein_coding	151176	FAM132B	NA	NA	0	0	1	7.9324e-06	0.0481959	eQTLGen_trans_eQTLs	NA	No	NA	NA	rs3858704	45
ENSG00000188011	CXXC11	2	242811752	242815975	1	protein_coding	285093	CXXC11	2.88586e-05	NA	0	0	5	5.1189e-07	0.00442957	eQTLGen_trans_eQTLs	NA	No	NA	0.003258	rs3858704	45
ENSG00000134107	BHLHE40	3	5020801	5027008	1	protein_coding	8553	BHLHE40	0.941607	1.06353	0	0	9	1.0526e-07	0.00118587	eQTLGen_trans_eQTLs	NA	No	NA	3.129e-09	rs3858704;rs2285626;rs12979148;rs7249692	1 day, 21:59:00
ENSG00000071282	LMCD1	3	8543393	8609805	1	protein_coding	29995	LMCD1	0.376044	-0.171235	0	0	4	4.2368e-07	0.00381688	eQTLGen_trans_eQTLs	NA	No	NA	NA	rs3858704	45
ENSG00000132170	PPARG	3	12328867	12475855	1	protein_coding	5468	PPARG	0.668218	-0.331736	0	0	1	5.679e-06	0.0366292	eQTLGen_trans_eQTLs	NA	No	NA	7.563e-78	rs7203984;rs11076174;rs118146573	51
ENSG00000170876	TMEM43	3	14166440	14185179	1	protein_coding	79188	TMEM43	9.84763e-08	0.212694	0	0	8	6.1873e-17	0	eQTLGen_trans_eQTLs	NA	No	NA	0.003258	rs3858704	45
ENSG00000154767	XPC	3	14186647	14220283	-1	protein_coding	7508	XPC	1.31713e-10	0.190841	0	0	1	3.8226e-06	0.0265341	eQTLGen_trans_eQTLs	NA	No	NA	0.003258	rs3858704	45
ENSG00000206561	COLQ	3	15491640	15563258	-1	protein_coding	8292	COLQ	1.42517e-07	1.23407	0	0	9	1.0301e-28	0	eQTLGen_trans_eQTLs	NA	No	NA	0.003258	rs3858704	45
ENSG00000206560	ANKRD28	3	15708743	15901278	-1	protein_coding	23243	ANKRD28	0.999929	-0.657585	0	0	7	1.9785e-11	0	eQTLGen_trans_eQTLs	NA	No	NA	0.003258	rs3858704	45
ENSG00000154814	OXNAD1	3	16306706	16391806	1	protein_coding	92106	OXNAD1	2.37385e-05	-0.0576428	0	0	8	5.4776e-14	0	eQTLGen_trans_eQTLs	NA	No	NA	0.003258	rs3858704	45
ENSG00000183960	KCNH8	3	19189946	19577138	1	protein_coding	131096	KCNH8	0.000102484	-0.427209	0	0	8	2.2127e-10	0	eQTLGen_trans_eQTLs	NA	No	NA	0.003258	rs3858704	45
ENSG00000144645	OSBPL10	3	31699382	32119072	-1	protein_coding	114884	OSBPL10	0.000141846	0.808791	0	0	8	7.0375e-17	0	eQTLGen_trans_eQTLs	NA	No	NA	0.003258	rs3858704	45
ENSG00000144635	DYNC1LI1	3	32567463	32612366	-1	protein_coding	51143	DYNC1LI1	0.977919	-0.606743	0	0	7	1.7244e-08	0.000232775	eQTLGen_trans_eQTLs	NA	No	NA	0.003258	rs3858704	45
ENSG00000168016	TRANK1	3	36868311	36986548	-1	protein_coding	9881	TRANK1	2.79379e-10	-0.69975	0	0	5	2.2548e-07	0.00220052	eQTLGen_trans_eQTLs	NA	No	NA	NA	rs3858704	45
ENSG00000168026	TTC21A	3	39149152	39180394	1	protein_coding	199223	TTC21A	2.12028e-16	NA	0	0	8	6.395e-11	0	eQTLGen_trans_eQTLs	NA	No	NA	0.003258	rs3858704	45
ENSG00000182606	TRAK1	3	42055294	42267381	1	protein_coding	22906	TRAK1	9.70917e-05	0.408624	0	0	8	3.9357e-20	0	eQTLGen_trans_eQTLs	NA	No	NA	0.003258	rs3858704	45
ENSG00000163823	CCR1	3	46243200	46249887	-1	protein_coding	1230	CCR1	0.891829	1.8919	0	0	7	4.0969e-07	0.00365521	eQTLGen_trans_eQTLs	NA	No	NA	0.003258	rs3858704	45
ENSG00000164054	SHISA5	3	48509197	48542259	-1	protein_coding	51246	SHISA5	9.94272e-08	-0.44203	0	0	3	1.2764e-06	0.0101437	eQTLGen_trans_eQTLs	NA	No	NA	0.003258	rs3858704	45
ENSG00000008300	CELSR3	3	48673902	48700348	-1	protein_coding	1951	CELSR3	0.999656	-0.878908	0	0	1	1.1273e-06	0.0090001	eQTLGen_trans_eQTLs	NA	No	NA	NA	rs2285626;rs12979148;rs7249692	59
ENSG00000182179	UBA7	3	49842640	49851379	-1	protein_coding	100847079	UBA7	2.68228e-14	-0.315381	0	0	1	6.631e-06	0.0416626	eQTLGen_trans_eQTLs	NA	No	NA	NA	rs3858704	45
ENSG00000041880	PARP3	3	51976361	51982883	1	protein_coding	10039	PARP3	1.48672e-08	-0.37974	0	0	6	9.4706e-08	0.00108341	eQTLGen_trans_eQTLs	NA	No	NA	NA	rs3858704	45
ENSG00000163935	SFMBT1	3	52937588	53080766	-1	protein_coding	51460	SFMBT1	0.995894	-0.337614	0	0	8	6.7011e-13	0	eQTLGen_trans_eQTLs	NA	No	NA	0.003258	rs3858704	45
ENSG00000144749	LRIG1	3	66429221	66551687	-1	protein_coding	26018	LRIG1	0.835794	NA	0	0	8	7.9467e-14	0	eQTLGen_trans_eQTLs	NA	No	NA	0.003258	rs3858704	45
ENSG00000163421	PROK2	3	71820807	71834357	-1	protein_coding	60675	PROK2	0.270454	-0.10809	0	0	1	2.1541e-06	0.0164129	eQTLGen_trans_eQTLs	NA	No	NA	0.01187	rs2385114	30
ENSG00000198919	DZIP3	3	108308529	108413693	1	protein_coding	9666	DZIP3	3.7422e-10	-0.416171	0	0	2	3.012e-06	0.021649	eQTLGen_trans_eQTLs	NA	No	NA	NA	rs3858704	45
ENSG00000186265	BTLA	3	112182815	112218408	-1	protein_coding	151888	BTLA	0.430977	-0.43896	0	0	7	4.0651e-08	0.000581973	eQTLGen_trans_eQTLs	NA	No	NA	0.003258	rs3858704	45
ENSG00000138459	SLC35A5	3	112280556	112304424	1	protein_coding	55032	SLC35A5	0.00141225	0.61419	0	0	3	6.3257e-06	0.0399873	eQTLGen_trans_eQTLs	NA	Yes	Left_Ventricle	8.742e-09	rs174547;rs9825670;rs9831948:rs9825670:rs9831948	12:39:00
ENSG00000178075	GRAMD1C	3	113547029	113666021	1	protein_coding	54762	GRAMD1C	8.1305e-10	-0.277459	0	0	6	4.5622e-09	0.000104676	eQTLGen_trans_eQTLs	NA	Yes	Fetal_Cortex	NA	rs3858704;rs9825670;rs9831948:rs9831948	12:45:00
ENSG00000184307	ZDHHC23	3	113666748	113684248	1	protein_coding	254887	ZDHHC23	3.89033e-06	-0.388017	0	0	9	8.6523e-11	0	DICE/T_CD4_naive_TREG:eQTLGen_trans_eQTLs	NA	No	NA	0.003258	rs9831948;rs3858704	12:45:00
ENSG00000163617	KIAA1407	3	113682984	113775460	-1	protein_coding	57577	KIAA1407	3.28847e-23	-0.454043	0	0	2	7.1811e-07	0.00616306	eQTLGen_trans_eQTLs	NA	Yes	Adult_Cortex:Fetal_Cortex:Left_Ventricle:IMR90	1.812e-09	rs3858704;rs9825670;rs9831948:rs9831948	12:45:00
ENSG00000181847	TIGIT	3	113995760	114029135	1	protein_coding	201633	TIGIT	0.0451499	0.134511	0	0	7	6.3736e-06	0.0181845	eQTLGen_cis_eQTLs	NA	Yes	Left_Ventricle:IMR90:Mesenchymal_Stem_Cell	7.984e-10	rs9831948;rs9831948:rs9825670	12
ENSG00000181722	ZBTB20	3	114056941	114866118	-1	protein_coding	26137	ZBTB20	0.982557	-0.268043	74	18.65	126	7.8972e-12	0	DICE/Monocyte_non_classical:DICE/T_CD4_naive_TREG:eQTLGen_cis_eQTLs:BIOSQTL/BIOS_eQTL_geneLevel:BRAINEAC/OCTX:BRAINEAC/TCTX:GTEx/v8/Adipose_Visceral_Omentum:GTEx/v8/Whole_Blood:GTEx/v7/Adipose_Subcutaneous:GTEx/v7/Adipose_Visceral_Omentum:GTEx/v7/Whole_Blood:GTEx/v7/Esophagus_Mucosa	NA	Yes	Adult_Cortex:Fetal_Cortex:Left_Ventricle:GM12878:IMR90:Mesenchymal_Stem_Cell:hESC	4.518e-11	rs9831948;rs9825670;rs9831948:rs9831948	12
ENSG00000172020	GAP43	3	115342171	115440337	1	protein_coding	2596	GAP43	0.0123799	-0.227889	0	0	23	2.31342e-06	0.0041104	GTEx/v8/Heart_Left_Ventricle:GTEx/v8/Skin_Sun_Exposed_Lower_leg:GTEx/v7/Heart_Left_Ventricle	NA	Yes	Adult_Cortex:Fetal_Cortex:Aorta:Left_Ventricle:Liver:GM12878:IMR90:Mesenchymal_Stem_Cell:Mesendoderm:Neural_Progenitor_Cell:Trophoblast-like_Cell:hESC	4.518e-11	rs9831948;rs9825670;rs9831948:rs9831948:rs9825670	12
ENSG00000185565	LSAMP	3	115521235	117716095	-1	protein_coding	4045	LSAMP	0.946284	NA	173	20.7	206	1.25962e-26	2.68882e-27	GTEx/v8/Adrenal_Gland:GTEx/v8/Artery_Aorta:GTEx/v8/Skin_Not_Sun_Exposed_Suprapubic:GTEx/v8/Testis:GTEx/v7/Adrenal_Gland:GTEx/v7/Testis:GTEx/v6/Adrenal_Gland	NA	Yes	Left_Ventricle:IMR90:Mesenchymal_Stem_Cell:Mesendoderm:hESC	1.676e-10	rs12489588;rs11711127;rs73185911;rs16827974;rs11711127:rs11711127;rs12489588:rs12489588:rs73185911:rs11711127	13
ENSG00000121578	B4GALT4	3	118930579	118959950	-1	protein_coding	8702	B4GALT4	2.3286e-06	0.86896	0	0	6	3.8543e-08	0.000499144	eQTLGen_trans_eQTLs	NA	No	NA	NA	rs3858704	45
ENSG00000113924	HGD	3	120347020	120401418	-1	protein_coding	3081	HGD	6.42452e-05	-0.551551	0	0	2	2.2524e-07	0.00220078	eQTLGen_trans_eQTLs	NA	No	NA	3.129e-09	rs2285626;rs12979148;rs7249692	59
ENSG00000138496	PARP9	3	122246771	122283424	-1	protein_coding	83666	PARP9	5.14044e-06	-0.316479	0	0	9	2.5693e-24	0	eQTLGen_trans_eQTLs	NA	No	NA	0.003258	rs3858704	45
ENSG00000173193	PARP14	3	122399465	122449687	1	protein_coding	54625	PARP14	0.0129607	0.134592	0	0	9	9.5206e-19	0	eQTLGen_trans_eQTLs	NA	No	NA	0.003258	rs3858704	45
ENSG00000114554	PLXNA1	3	126707437	126756235	1	protein_coding	5361	PLXNA1	0.999998	-0.2534	0	0	1	4.2087e-06	0.0286739	eQTLGen_trans_eQTLs	NA	No	NA	1.11e-12	rs780095	9
ENSG00000179348	GATA2	3	128198270	128212028	-1	protein_coding	2624	GATA2	0.979762	-0.230415	0	0	2	1.2961e-07	0.00139675	eQTLGen_trans_eQTLs	NA	No	NA	5.32e-130	rs651821;rs180326;rs11604424;rs10892023	44
ENSG00000073711	PPP2R3A	3	135684515	135866733	1	protein_coding	5523	PPP2R3A	0.920488	-0.863679	26	15.19	306	9.0298e-41	0	EyeGEx:eQTLcatalogue/BLUEPRINT_ge_monocyte:eQTLcatalogue/Quach_2016_ge_monocyte_LPS:PsychENCODE_eQTLs:DICE/Monocyte_non_classical:eQTLGen_cis_eQTLs:BIOSQTL/BIOS_eQTL_geneLevel:CMC_SVA_cis:GTEx/v8/Adipose_Subcutaneous:GTEx/v8/Adipose_Visceral_Omentum:GTEx/v8/Artery_Tibial:GTEx/v8/Brain_Cerebellum:GTEx/v8/Esophagus_Mucosa:GTEx/v8/Lung:GTEx/v8/Nerve_Tibial:GTEx/v8/Spleen:GTEx/v8/Stomach:GTEx/v8/Thyr…	NA	Yes	IMR90:Mesenchymal_Stem_Cell:Mesendoderm:Trophoblast-like_Cell:hESC	6.173e-09	rs28489907	14
ENSG00000174579	MSL2	3	135867764	135916083	-1	protein_coding	55167	MSL2	0.889664	-1.74205	31	22.4	342	3.54088e-27	0	eQTLcatalogue/CEDAR_neutrophil_CD15:eQTLcatalogue/Fairfax_2014_IFN24:eQTLcatalogue/Fairfax_2014_LPS24:eQTLcatalogue/Kasela_2017_T-cell_CD4:eQTLGen_cis_eQTLs:BIOSQTL/BIOS_eQTL_geneLevel:xQTLServer_eQTLs:GTEx/v8/Whole_Blood:GTEx/v8/Artery_Aorta:GTEx/v7/Artery_Aorta:GTEx/v7/Brain_Anterior_cingulate_cortex_BA24:GTEx/v7/Skin_Sun_Exposed_Lower_leg	NA	Yes	Promoter_anchored_loops:Adult_Cortex:Fetal_Cortex:Aorta:Hippocampus:Left_Ventricle:Liver:Spleen:GM12878:IMR90:Mesenchymal_Stem_Cell:Mesendoderm:Trophoblast-like_Cell:hESC	6.173e-09	rs28489907	14
ENSG00000114054	PCCB	3	135969148	136056738	1	protein_coding	5096	PCCB	0.000735839	-0.38516	79	17.73	422	3.27170000000001e-310	0	TIGER/Nom_Alonso_Pancreatic_islets:Nom_InsPIRE_Islets_Gene_eQTLs_Nominal_Pvalues:EyeGEx:eQTLcatalogue/Alasoo_2018_ge_macrophage_IFNg:eQTLcatalogue/BLUEPRINT_ge_monocyte:eQTLcatalogue/BLUEPRINT_ge_T-cell:eQTLcatalogue/CEDAR_ileum:eQTLcatalogue/CEDAR_monocyte_CD14:eQTLcatalogue/CEDAR_platelet:eQTLcatalogue/CEDAR_rectum:eQTLcatalogue/CEDAR_T-cell_CD4:eQTLcatalogue/CEDAR_T-cell_CD8:eQTLcatalogue/CEDA…	NA	Yes	EP_links_oneway:Promoter_anchored_loops:Adult_Cortex:Fetal_Cortex:Liver:GM12878:IMR90:Mesenchymal_Stem_Cell:Mesendoderm:Trophoblast-like_Cell:hESC	6.173e-09	rs28489907	14
ENSG00000118007	STAG1	3	136055077	136471220	-1	protein_coding	10274	STAG1	1	-0.647638	329	21.8	371	2.6348e-78	0	eQTLcatalogue/CEDAR_B-cell_CD19:eQTLcatalogue/CEDAR_rectum:eQTLcatalogue/CEDAR_T-cell_CD4:eQTLcatalogue/CEDAR_T-cell_CD8:eQTLcatalogue/Fairfax_2012_B-cell_CD19:eQTLcatalogue/Fairfax_2014_IFN24:eQTLcatalogue/Fairfax_2014_LPS24:eQTLcatalogue/Fairfax_2014_naive:eQTLcatalogue/Kasela_2017_T-cell_CD4:eQTLcatalogue/Kasela_2017_T-cell_CD8:eQTLGen_cis_eQTLs:BIOSQTL/BIOS_eQTL_geneLevel:CMC_SVA_cis:GTEx/v8/…	NA	Yes	Promoter_anchored_loops:Adult_Cortex:Fetal_Cortex:Aorta:Hippocampus:Left_Ventricle:Liver:Spleen:GM12878:IMR90:Mesenchymal_Stem_Cell:Mesendoderm:Neural_Progenitor_Cell:Trophoblast-like_Cell:hESC	6.173e-09	rs28489907	14
ENSG00000168917	SLC35G2	3	136537489	136574734	1	protein_coding	80723	SLC35G2	0.0663953	-0.300343	5	9.621	244	8.35213e-09	2.83733e-05	PsychENCODE_eQTLs:BIOSQTL/BIOS_eQTL_geneLevel:CMC_SVA_cis:BRAINEAC/CRBL:BRAINEAC/MEDU:GTEx/v8/Brain_Cerebellum:GTEx/v8/Brain_Putamen_basal_ganglia:GTEx/v8/Esophagus_Muscularis:GTEx/v8/Muscle_Skeletal:GTEx/v8/Nerve_Tibial:GTEx/v8/Thyroid:GTEx/v7/Nerve_Tibial:GTEx/v7/Thyroid:GTEx/v6/Esophagus_Muscularis:GTEx/v6/Nerve_Tibial	NA	Yes	Promoter_anchored_loops:GM12878:IMR90:Mesenchymal_Stem_Cell	6.125e-07	rs28489907	14
ENSG00000158092	NCK1	3	136581050	136668665	1	protein_coding	4690	NCK1	0.00103503	-0.568989	6	9.028	163	2.8437e-13	0	eQTLGen_cis_eQTLs:GTEx/v8/Esophagus_Mucosa:GTEx/v8/Liver:GTEx/v8/Skin_Sun_Exposed_Lower_leg:GTEx/v8/Thyroid:GTEx/v7/Esophagus_Mucosa:GTEx/v7/Thyroid	NA	Yes	Left_Ventricle:IMR90	6.173e-09	rs28489907	14
ENSG00000174564	IL20RB	3	136665072	136729927	1	protein_coding	53833	IL20RB	0.000354183	0.165775	0	0	407	9.63901e-38	4.6401e-80	eQTLcatalogue/HipSci_ge_iPSC:eQTLcatalogue/TwinsUK_ge_fat:eQTLcatalogue/TwinsUK_ge_skin:GTEx/v8/Adipose_Subcutaneous:GTEx/v8/Adipose_Visceral_Omentum:GTEx/v8/Artery_Aorta:GTEx/v8/Artery_Tibial:GTEx/v8/Brain_Hypothalamus:GTEx/v8/Brain_Substantia_nigra:GTEx/v8/Breast_Mammary_Tissue:GTEx/v8/Esophagus_Gastroesophageal_Junction:GTEx/v8/Esophagus_Mucosa:GTEx/v8/Esophagus_Muscularis:GTEx/v8/Heart_Atrial…	NA	Yes	Left_Ventricle:Liver:GM12878:IMR90:Mesenchymal_Stem_Cell:Mesendoderm:Trophoblast-like_Cell:hESC	6.173e-09	rs28489907	14
ENSG00000114127	XRN1	3	142025449	142166904	-1	protein_coding	54464	XRN1	0.995838	-1.85237	0	0	7	1.4651e-08	0.000189036	eQTLGen_trans_eQTLs	NA	No	NA	0.003258	rs3858704	45
ENSG00000144935	TRPC1	3	142442916	142526730	1	protein_coding	7220	TRPC1	0.784922	NA	0	0	1	4.3776e-06	0.0295696	eQTLGen_trans_eQTLs	NA	No	NA	NA	rs3858704	45
ENSG00000163751	CPA3	3	148583043	148614983	1	protein_coding	1359	CPA3	1.28343e-12	0.0249414	0	0	10	5.0426e-08	0.000695217	eQTLGen_trans_eQTLs	NA	No	NA	8.45e-131	rs42129;rs2385114;rs651821;rs180326;rs11604424;rs10892023	23:30:44
ENSG00000174944	P2RY14	3	150929905	150996255	-1	protein_coding	9934	P2RY14	0.000377084	0.00626441	0	0	7	1.2154e-10	0	eQTLGen_trans_eQTLs	NA	No	NA	0.003258	rs3858704	45
ENSG00000163659	TIPARP	3	156391024	156424559	1	protein_coding	25976	TIPARP	0.997752	-1.24771	0	0	8	2.889e-14	0	eQTLGen_trans_eQTLs	NA	No	NA	0.003258	rs3858704	45
ENSG00000163536	SERPINI1	3	167453031	167543356	1	protein_coding	5274	SERPINI1	0.930874	-0.339055	0	0	2	4.3566e-06	0.0294082	eQTLGen_trans_eQTLs	NA	No	NA	8.45e-131	rs651821;rs10892023	44
ENSG00000075651	PLD1	3	171318195	171528740	-1	protein_coding	5337	PLD1	7.20705e-16	-0.646018	0	0	5	1.0012e-06	0.00819799	eQTLGen_trans_eQTLs	NA	No	NA	NA	rs3858704	45
ENSG00000114346	ECT2	3	172468472	172539264	1	protein_coding	1894	ECT2	2.55529e-05	0.106986	0	0	8	4.0653e-17	0	eQTLGen_trans_eQTLs	NA	No	NA	0.003258	rs3858704	45
ENSG00000058063	ATP11B	3	182511288	182639423	1	protein_coding	23200	ATP11B	0.992835	-1.00534	0	0	1	7.9696e-06	0.0483628	eQTLGen_trans_eQTLs	NA	No	NA	4.508e-08	rs174547	39
ENSG00000244405	ETV5	3	185764097	185828107	-1	protein_coding	2119	ETV5	0.999892	-0.923477	20	10.3	26	6.1853e-103	0	eQTLcatalogue/Alasoo_2018_ge_macrophage_IFNg:eQTLcatalogue/BLUEPRINT_ge_monocyte:eQTLcatalogue/Fairfax_2014_IFN24:eQTLcatalogue/Fairfax_2014_naive:eQTLcatalogue/Quach_2016_ge_monocyte_IAV:eQTLGen_cis_eQTLs:BIOSQTL/BIOS_eQTL_geneLevel:GTEx/v8/Whole_Blood:GTEx/v8/Spleen	NA	Yes	Promoter_anchored_loops:Adult_Cortex:Fetal_Cortex:Hippocampus:Liver:GM12878:IMR90:Mesenchymal_Stem_Cell:Mesendoderm:Neural_Progenitor_Cell:Trophoblast-like_Cell:hESC	2.291e-10	rs4234589	15
ENSG00000058866	DGKG	3	185823457	186080026	-1	protein_coding	1608	DGKG	5.43821e-06	-0.56543	11	10.29	0	NA	NA	NA	NA	Yes	Adult_Cortex:Fetal_Cortex:GM12878:IMR90:Mesenchymal_Stem_Cell:Mesendoderm:Trophoblast-like_Cell:hESC	2.291e-10	rs4234589	15
ENSG00000113889	KNG1	3	186435065	186461743	1	protein_coding	3827	KNG1	4.17299e-08	1.32849	0	0	1	3.75903e-05	0.049	DICE/Monocyte_classical	NA	No	NA	NA	rs4234589	15
ENSG00000163918	RFC4	3	186507669	186524847	-1	protein_coding	5984	RFC4	9.67498e-05	-0.586488	0	0	1	8.01998e-05	3.44816e-23	GTEx/v8/Skin_Not_Sun_Exposed_Suprapubic	NA	Yes	IMR90:Mesenchymal_Stem_Cell	2.291e-10	rs4234589	15
ENSG00000196083	IL1RAP	3	190231840	190375843	1	protein_coding	3556	IL1RAP	0.506747	-0.498078	0	0	8	3.3901e-10	2.14638e-05	eQTLGen_trans_eQTLs	NA	No	NA	0.003258	rs3858704	45
ENSG00000152492	CCDC50	3	191046866	191116459	1	protein_coding	152137	CCDC50	9.33289e-06	0.107293	0	0	4	1.5063e-06	0.0117385	eQTLGen_trans_eQTLs	NA	No	NA	NA	rs3858704	45
ENSG00000178222	RNF212	4	1050038	1107350	-1	protein_coding	285498	RNF212	0.125226	NA	0	0	1	4.097e-06	0.0280494	eQTLGen_trans_eQTLs	NA	No	NA	NA	rs2285626;rs12979148;rs7249692	59
ENSG00000109736	MFSD10	4	2932288	2936586	-1	protein_coding	10227	MFSD10	3.01777e-07	NA	0	0	12	1.5924e-13	0	eQTLGen_cis_eQTLs	NA	No	NA	1.639e-08	rs3129317	16
ENSG00000125388	GRK4	4	2965335	3042474	1	protein_coding	2868	GRK4	5.69042e-07	NA	0	0	17	1.5039e-14	0	eQTLcatalogue/TwinsUK_ge_fat:eQTLGen_cis_eQTLs:GTEx/v8/Whole_Blood:GTEx/v8/Colon_Transverse:GTEx/v8/Thyroid	NA	Yes	Promoter_anchored_loops	1.639e-08	rs3129317	16
ENSG00000197386	HTT	4	3076408	3245676	1	protein_coding	3064	HTT	1	-0.565823	0	0	8	5.2578e-09	3.56796e-27	eQTLGen_cis_eQTLs:GTEx/v8/Muscle_Skeletal:GTEx/v7/Muscle_Skeletal	NA	Yes	Promoter_anchored_loops:IMR90	1.639e-08	rs3129317	16
ENSG00000188981	MSANTD1	4	3246096	3273465	1	protein_coding	345222	MSANTD1	0.322172	-0.464369	12	6.483	14	6.55286e-09	2.49251e-30	eQTLGen_cis_eQTLs:BIOSQTL/BIOS_eQTL_geneLevel:GTEx/v8/Thyroid:GTEx/v7/Thyroid	NA	Yes	Promoter_anchored_loops:IMR90	1.639e-08	rs3129317	16
ENSG00000159788	RGS12	4	3294755	3441640	1	protein_coding	6002	RGS12	0.000560374	0.0730534	10	5.461	22	3.1415e-31	0	eQTLcatalogue/BLUEPRINT_ge_T-cell:eQTLcatalogue/Fairfax_2014_IFN24:eQTLcatalogue/GENCORD_ge_T-cell:eQTLGen_cis_eQTLs:BIOSQTL/BIOS_eQTL_geneLevel:CMC_SVA_cis:CMC_NoSVA_cis:GTEx/v8/Brain_Cerebellar_Hemisphere:GTEx/v8/Brain_Cerebellum:GTEx/v8/Lung:GTEx/v8/Testis:GTEx/v8/Thyroid:GTEx/v7/Brain_Cerebellar_Hemisphere:GTEx/v7/Brain_Cerebellum:GTEx/v7/Thyroid	NA	Yes	Promoter_anchored_loops:IMR90	1.639e-08	rs3129317	16
ENSG00000109758	HGFAC	4	3443614	3451211	1	protein_coding	3083	HGFAC	5.20821e-07	-0.328344	0	0	8	2.64617e-09	1.36979e-08	GTEx/v8/Brain_Cerebellar_Hemisphere:GTEx/v8/Brain_Cerebellum:GTEx/v7/Brain_Cerebellum	NA	Yes	Promoter_anchored_loops:IMR90:Mesenchymal_Stem_Cell:Mesendoderm	1.639e-08	rs3129317	16
ENSG00000175920	DOK7	4	3465033	3503200	1	protein_coding	285489	DOK7	0.00480838	1.7604	0	0	2	1.38895e-05	0.009241	BIOSQTL/BIOS_eQTL_geneLevel	NA	Yes	Promoter_anchored_loops:IMR90:Mesenchymal_Stem_Cell:Mesendoderm	4.495e-06	rs3129317	16
ENSG00000002587	HS3ST1	4	11394774	11431389	-1	protein_coding	9957	HS3ST1	0.00617541	-1.01446	0	0	7	8.1489e-08	0.00103531	eQTLGen_trans_eQTLs	NA	No	NA	0.003258	rs3858704	45
ENSG00000169744	LDB2	4	16503164	16900432	-1	protein_coding	9079	LDB2	0.976068	-0.509111	0	0	5	1.2918e-07	0.00137228	eQTLGen_trans_eQTLs	NA	No	NA	NA	rs3858704	45
ENSG00000002549	LAP3	4	17578815	17609595	1	protein_coding	51056	LAP3	0.00122013	NA	0	0	5	6.0818e-07	0.00532932	eQTLGen_trans_eQTLs	NA	No	NA	NA	rs3858704	45
ENSG00000109805	NCAPG	4	17812525	17846485	1	protein_coding	64151	NCAPG	0.618144	0.0277038	0	0	1	6.3676e-06	0.0402682	eQTLGen_trans_eQTLs	NA	No	NA	NA	rs3858704	45
ENSG00000091490	SEL1L3	4	25749055	25865382	-1	protein_coding	23231	SEL1L3	0.62882	-0.176835	0	0	7	4.415e-10	2.11015e-05	eQTLGen_trans_eQTLs	NA	No	NA	0.003258	rs3858704	45
ENSG00000181826	RELL1	4	37592422	37687998	-1	protein_coding	768211	RELL1	0.88355	NA	0	0	7	6.0404e-08	0.000805791	eQTLGen_trans_eQTLs	NA	No	NA	0.003258	rs3858704	45
ENSG00000157796	WDR19	4	39184024	39287430	1	protein_coding	57728	WDR19	1.73111e-07	-0.392479	0	0	7	2.4421e-10	0	eQTLGen_trans_eQTLs	NA	No	NA	0.003258	rs3858704	45
ENSG00000163694	RBM47	4	40425272	40632892	-1	protein_coding	54502	RBM47	0.958532	-0.203591	0	0	1	3.3876e-06	0.0239473	eQTLGen_trans_eQTLs	NA	No	NA	NA	rs3858704	45
ENSG00000074966	TXK	4	48068410	48136273	-1	protein_coding	7294	TXK	1.24866e-07	-0.119948	0	0	8	2.315e-14	0	eQTLGen_trans_eQTLs	NA	No	NA	0.003258	rs3858704	45
ENSG00000132465	IGJ	4	71521258	71547534	-1	protein_coding	3512	IGJ	0.00484727	-0.238531	0	0	8	9.3458e-10	3.96432e-05	eQTLGen_trans_eQTLs	NA	No	NA	0.003258	rs3858704	45
ENSG00000169116	PARM1	4	75858305	75975325	1	protein_coding	25849	PARM1	0.00606336	1.14734	0	0	8	1.1311e-08	0.000177048	eQTLGen_trans_eQTLs	NA	No	NA	0.003258	rs3858704	45
ENSG00000138755	CXCL9	4	76922428	76928641	-1	protein_coding	4283	CXCL9	0.00533395	0.306442	0	0	4	2.6781e-07	0.00258303	eQTLGen_trans_eQTLs	NA	No	NA	NA	rs3858704	45
ENSG00000169245	CXCL10	4	76942273	76944650	-1	protein_coding	3627	CXCL10	0.731026	0.228312	0	0	8	2.3827e-10	0	eQTLGen_trans_eQTLs	NA	No	NA	0.003258	rs3858704	45
ENSG00000138758	2024-09-11	4	77870856	77961537	1	protein_coding	55752	2024-09-11	0.681902	-0.149498	0	0	1	7.8586e-06	0.0477876	eQTLGen_trans_eQTLs	NA	No	NA	NA	rs3858704	45
ENSG00000163297	ANTXR2	4	80822303	81046608	-1	protein_coding	118429	ANTXR2	0.405189	-0.118939	0	0	8	2.7481e-17	0	eQTLGen_trans_eQTLs	NA	No	NA	0.003258	rs3858704	45
ENSG00000145335	SNCA	4	90645250	90759466	-1	protein_coding	6622	SNCA	0.841962	-0.192397	0	0	3	1.8184e-07	0.00178571	eQTLGen_trans_eQTLs	NA	No	NA	2.967e-09	rs6065904	62
ENSG00000168785	TSPAN5	4	99391518	99579780	-1	protein_coding	10098	TSPAN5	0.927949	-0.439719	0	0	2	0.00023728	1.55678e-06	GTEx/v8/Cells_Cultured_fibroblasts	NA	Yes	Aorta:Left_Ventricle:Liver:IMR90:Mesenchymal_Stem_Cell:Mesendoderm:Trophoblast-like_Cell:hESC	1.613e-09	rs111874202	17
ENSG00000197894	ADH5	4	99992132	100009952	-1	protein_coding	128	ADH5	9.11478e-07	2.3443	0	0	3	3.89232e-05	3.54408e-24	GTEx/v8/Esophagus_Mucosa:GTEx/v8/Muscle_Skeletal	NA	Yes	IMR90:Mesendoderm:Trophoblast-like_Cell:hESC	2.819e-07	rs111874202	17
ENSG00000187758	ADH1A	4	100197524	100212185	-1	protein_coding	124	ADH1A	6.68922e-08	0.125384	0	0	15	5.63912e-05	4.14855e-08	TIGER/Nom_Alonso_Pancreatic_islets:GTEx/v8/Small_Intestine_Terminal_Ileum	NA	Yes	Liver:IMR90:Mesendoderm:hESC	7.577e-08	rs111874202	17
ENSG00000196344	ADH7	4	100333418	100356894	-1	protein_coding	131	ADH7	7.33278e-09	0.279847	0	0	12	8.22794e-09	2.56101e-05	GTEx/v8/Esophagus_Mucosa:GTEx/v8/Skin_Sun_Exposed_Lower_leg:GTEx/v7/Esophagus_Mucosa:GTEx/v7/Skin_Sun_Exposed_Lower_leg	NA	Yes	Liver:IMR90:Mesenchymal_Stem_Cell:Mesendoderm:Trophoblast-like_Cell:hESC	8.149e-08	rs111874202	17
ENSG00000138813	C4orf17	4	100432161	100463460	1	protein_coding	84103	C4orf17	5.6521e-09	-0.225203	20	8.997	0	NA	NA	NA	NA	Yes	Mesenchymal_Stem_Cell:Mesendoderm:hESC	7.577e-08	rs111874202	17
ENSG00000145331	TRMT10A	4	100467866	100485189	-1	protein_coding	93587	TRMT10A	2.83743e-05	-0.268448	21	8.997	104	2.4066e-18	0	EyeGEx:eQTLcatalogue/GEUVADIS_ge_LCL:eQTLGen_cis_eQTLs:GTEx/v8/Testis:GTEx/v7/Testis:GTEx/v6/Testis	NA	No	NA	1.613e-09	rs111874202	17
ENSG00000138823	MTTP	4	100484918	100545156	1	protein_coding	4547	MTTP	0.0125834	0.759771	26	15.67	94	1.47715e-24	7.01378e-22	EyeGEx:eQTLcatalogue/TwinsUK_ge_LCL:PsychENCODE_eQTLs	NA	No	NA	1.613e-09	rs111874202	17
ENSG00000248713	RP11-766F14.2	4	100557686	100575805	-1	protein_coding	285556	NA	NA	NA	10	11.99	11	2.12916e-06	0.000562644	GTEx/v8/Ovary:GTEx/v7/Ovary	NA	Yes	IMR90:Mesenchymal_Stem_Cell:Mesendoderm:hESC	5.64e-08	rs111874202	17
ENSG00000164031	DNAJB14	4	100817405	100867883	-1	protein_coding	79982	DNAJB14	0.956255	-1.30277	0	0	3	4.46107e-05	0.00859268	GTEx/v8/Colon_Transverse:GTEx/v7/Testis	NA	Yes	Aorta:Left_Ventricle:Liver:GM12878:IMR90:Mesenchymal_Stem_Cell:Mesendoderm:Trophoblast-like_Cell:hESC	3.517e-09	rs111874202	17
ENSG00000164032	H2AFZ	4	100869243	100871545	-1	protein_coding	3015	H2AFZ	0.855327	-0.78865	0	0	12	5.28506e-06	0.0264253	eQTLcatalogue/TwinsUK_ge_LCL	NA	Yes	Promoter_anchored_loops:Aorta:Left_Ventricle:Liver:GM12878:IMR90:Mesenchymal_Stem_Cell:Mesendoderm:Trophoblast-like_Cell:hESC	3.517e-09	rs111874202	17
ENSG00000145358	DDIT4L	4	101107027	101111939	-1	protein_coding	115265	DDIT4L	0.000548864	3.3222	0	0	1	0.00028985	1.20357e-05	GTEx/v8/Cells_Cultured_fibroblasts	NA	Yes	IMR90	7.584e-08	rs111874202	17
ENSG00000254531	AP001816.1	4	102268937	102270040	1	protein_coding	NA	NA	NA	NA	0	0	2	2.221e-06	0.016755	eQTLGen_trans_eQTLs	NA	No	NA	NA	rs3858704	45
ENSG00000153064	BANK1	4	102332443	102995969	1	protein_coding	55024	BANK1	1.76433e-10	-0.305251	0	0	8	8.3337e-15	0	eQTLGen_trans_eQTLs	NA	Yes	IMR90	7.577e-08	rs3858704;rs111874202	17:45:00
ENSG00000138821	SLC39A8	4	103172198	103352415	-1	protein_coding	64116	SLC39A8	0.891567	-0.202749	0	0	3	2.4458e-06	0.018084	eQTLGen_trans_eQTLs	NA	No	NA	NA	rs3858704	45
ENSG00000109320	NFKB1	4	103422486	103538459	1	protein_coding	4790	NFKB1	0.99426	NA	0	0	6	1.9839e-11	0	eQTLGen_trans_eQTLs	NA	No	NA	0.003258	rs3858704	45
ENSG00000138795	LEF1	4	108968701	109090112	-1	protein_coding	51176	LEF1	0.970135	-0.536386	0	0	8	1.4397e-08	0.000189304	eQTLGen_trans_eQTLs	NA	No	NA	0.003258	rs3858704	45
ENSG00000073331	ALPK1	4	113206665	113363776	1	protein_coding	80216	ALPK1	9.99914e-08	1.00217	0	0	7	1.162e-09	3.91236e-05	eQTLGen_trans_eQTLs	NA	No	NA	0.003258	rs3858704	45
ENSG00000164111	ANXA5	4	122589110	122618268	-1	protein_coding	308	ANXA5	3.81588e-06	NA	0	0	3	4.1838e-07	0.0037666	eQTLGen_trans_eQTLs	NA	No	NA	0.003258	rs3858704	45
ENSG00000109436	TBC1D9	4	141541919	141677274	-1	protein_coding	23158	TBC1D9	0.876941	-0.648225	0	0	6	2.5635e-07	0.0025029	eQTLGen_trans_eQTLs	NA	No	NA	NA	rs3858704	45
ENSG00000109452	INPP4B	4	142944313	143768585	-1	protein_coding	8821	INPP4B	0.998611	-0.0796148	0	0	9	4.7039e-21	0	eQTLGen_trans_eQTLs	NA	No	NA	0.003258	rs3858704	45
ENSG00000151623	NR3C2	4	148999913	149365850	-1	protein_coding	4306	NR3C2	0.925089	-1.46444	0	0	5	1.3195e-06	0.0104525	eQTLGen_trans_eQTLs	NA	No	NA	NA	rs3858704	45
ENSG00000121210	KIAA0922	4	154387498	154557863	1	protein_coding	23240	KIAA0922	0.99939	NA	0	0	4	7.353e-07	0.00628982	eQTLGen_trans_eQTLs	NA	No	NA	NA	rs3858704	45
ENSG00000145431	PDGFC	4	157681606	157892546	-1	protein_coding	56034	PDGFC	0.969061	-0.339265	0	0	1	5.062e-06	0.0332275	eQTLGen_trans_eQTLs	NA	No	NA	0.01301	rs3858704	45
ENSG00000109756	RAPGEF2	4	160025330	160281321	1	protein_coding	9693	RAPGEF2	0.999997	-1.04823	0	0	5	3.7074e-07	0.00336979	eQTLGen_trans_eQTLs	NA	No	NA	NA	rs3858704	45
ENSG00000129116	PALLD	4	169418217	169849608	1	protein_coding	23022	PALLD	6.63952e-05	0.15787	0	0	4	2.2987e-07	0.00221753	eQTLGen_trans_eQTLs	NA	No	NA	0.00431	rs174547	39
ENSG00000082074	FYB	5	39105338	39274630	-1	protein_coding	2533	FYB	0.792006	0.193923	0	0	6	1.3644e-08	0.000189994	eQTLGen_trans_eQTLs	NA	No	NA	NA	rs3858704	45
ENSG00000112972	HMGCS1	5	43289497	43313614	-1	protein_coding	3157	HMGCS1	0.972849	-0.325172	0	0	18	5.1457e-07	0.00445813	eQTLGen_trans_eQTLs	NA	No	NA	2.255e-09	rs174547	39
ENSG00000164512	ANKRD55	5	55395507	55529186	-1	protein_coding	79722	ANKRD55	2.43501e-07	0.294496	0	0	8	1.1729e-10	0	eQTLGen_trans_eQTLs	NA	No	NA	0.003258	rs3858704	45
ENSG00000145675	PIK3R1	5	67511548	67597649	1	protein_coding	5295	PIK3R1	0.99824	3.50658	0	0	6	3.4055e-08	0.000448755	eQTLGen_trans_eQTLs	NA	No	NA	NA	rs3858704	45
ENSG00000176928	GCNT4	5	74323289	74326724	-1	protein_coding	51301	GCNT4	0.021235	1.25008	0	0	102	7.6044e-20	9.8433e-55	eQTLGen_cis_eQTLs:BRAINEAC/THAL:GTEx/v8/Artery_Aorta:GTEx/v8/Artery_Tibial:GTEx/v8/Esophagus_Muscularis:GTEx/v8/Testis:GTEx/v7/Artery_Aorta:GTEx/v7/Skin_Not_Sun_Exposed_Suprapubic:GTEx/v7/Testis:GTEx/v6/Testis	NA	Yes	Left_Ventricle:GM12878:IMR90:Mesenchymal_Stem_Cell:Mesendoderm:Trophoblast-like_Cell:hESC	1.754e-10	rs6864091	18
ENSG00000145700	ANKRD31	5	74364100	74532703	-1	protein_coding	256006	ANKRD31	NA	NA	0	0	103	7.99822e-11	1.94997e-08	EyeGEx:PsychENCODE_eQTLs:CMC_SVA_cis	NA	Yes	Adult_Cortex:Left_Ventricle	1.754e-10	rs6864091	18
ENSG00000113161	HMGCR	5	74632154	74657929	1	protein_coding	3156	HMGCR	0.999837	-0.514442	23	12.4	130	6.1941e-40	0	EyeGEx:eQTLcatalogue/TwinsUK_ge_skin:PsychENCODE_eQTLs:eQTLGen_cis_eQTLs:BIOSQTL/BIOS_eQTL_geneLevel:CMC_SVA_cis:GTEx/v8/Muscle_Skeletal:GTEx/v7/Muscle_Skeletal	NA	Yes	Promoter_anchored_loops:GM12878	1.754e-10	rs6864091	18
ENSG00000113163	COL4A3BP	5	74664311	74807963	-1	protein_coding	10087	COL4A3BP	0.979474	-1.64811	17	6.957	108	1.19644e-15	0	eQTLcatalogue/BLUEPRINT_ge_T-cell:DICE/T_CD4_TH2:eQTLGen_cis_eQTLs:BIOSQTL/BIOS_eQTL_geneLevel:GTEx/v8/Esophagus_Mucosa:GTEx/v8/Muscle_Skeletal:GTEx/v8/Nerve_Tibial:GTEx/v8/Cells_Cultured_fibroblasts:GTEx/v7/Esophagus_Mucosa:GTEx/v7/Muscle_Skeletal:GTEx/v7/Nerve_Tibial:GTEx/v7/Cells_Transformed_fibroblasts:GTEx/v6/Esophagus_Mucosa:GTEx/v6/Muscle_Skeletal	NA	Yes	Promoter_anchored_loops:Adult_Cortex:Fetal_Cortex:Left_Ventricle:Liver:GM12878:IMR90:Mesenchymal_Stem_Cell:Mesendoderm:Trophoblast-like_Cell:hESC	1.754e-10	rs6864091	18
ENSG00000122008	POLK	5	74807581	74896969	1	protein_coding	51426	POLK	5.99896e-07	-0.474863	9	6.402	163	2.02694e-12	3.23786e-09	TIGER/Nom_Alonso_Pancreatic_islets:EyeGEx:BIOSQTL/BIOS_eQTL_geneLevel:GTEx/v8/Adipose_Subcutaneous:GTEx/v8/Adipose_Visceral_Omentum:GTEx/v8/Artery_Aorta:GTEx/v8/Artery_Tibial:GTEx/v8/Brain_Caudate_basal_ganglia:GTEx/v8/Brain_Cerebellar_Hemisphere:GTEx/v8/Brain_Cerebellum:GTEx/v8/Esophagus_Muscularis:GTEx/v8/Heart_Left_Ventricle:GTEx/v8/Lung:GTEx/v8/Nerve_Tibial:GTEx/v8/Pancreas:GTEx/v8/Pituitary:…	NA	Yes	Promoter_anchored_loops:Adult_Cortex:Fetal_Cortex:Left_Ventricle:Liver:GM12878:IMR90:Mesenchymal_Stem_Cell:Mesendoderm:Trophoblast-like_Cell:hESC	1.754e-10	rs6864091	18
ENSG00000189045	ANKDD1B	5	74907284	74967671	1	protein_coding	728780	ANKDD1B	NA	0.593695	53	45	191	1.9508e-32	0	TIGER/Nom_Alonso_Pancreatic_islets:eQTLcatalogue/BLUEPRINT_ge_monocyte:eQTLcatalogue/BrainSeq_ge_brain:eQTLcatalogue/CEDAR_rectum:eQTLcatalogue/CEDAR_transverse_colon:eQTLcatalogue/TwinsUK_ge_LCL:eQTLcatalogue/TwinsUK_ge_skin:PsychENCODE_eQTLs:DICE/T_CD4_naive:DICE/T_CD8_naive:DICE/T_CD4_TH1:DICE/T_CD4_TH17:DICE/T_CD4_TH1_17:DICE/T_CD4_TH2:DICE/T_CD4_memory_TREG:DICE/T_CD4_naive_TREG:eQTLGen_cis_…	NA	Yes	Left_Ventricle:Liver:Right_Ventricle:GM12878:IMR90:Mesenchymal_Stem_Cell:Mesendoderm:Neural_Progenitor_Cell:Trophoblast-like_Cell:hESC	1.754e-10	rs6864091	18
ENSG00000152359	POC5	5	74969949	75013313	-1	protein_coding	134359	POC5	0.00213816	0.193562	113	45	196	3.27170000000001e-310	0	EyeGEx:eQTLcatalogue/Alasoo_2018_ge_macrophage_naive:eQTLcatalogue/BLUEPRINT_ge_monocyte:eQTLcatalogue/BLUEPRINT_ge_neutrophil:eQTLcatalogue/BLUEPRINT_ge_T-cell:eQTLcatalogue/BrainSeq_ge_brain:eQTLcatalogue/CEDAR_B-cell_CD19:eQTLcatalogue/CEDAR_neutrophil_CD15:eQTLcatalogue/Fairfax_2012_B-cell_CD19:eQTLcatalogue/Fairfax_2014_LPS2:eQTLcatalogue/Fairfax_2014_naive:eQTLcatalogue/GENCORD_ge_LCL:eQTLc…	NA	Yes	Promoter_anchored_loops:Aorta:Left_Ventricle:Liver:GM12878:IMR90:Mesenchymal_Stem_Cell:Mesendoderm:Trophoblast-like_Cell:hESC	1.754e-10	rs6864091;rs3858704	18:45:00
ENSG00000122012	SV2C	5	75378997	75649764	1	protein_coding	22987	SV2C	6.35694e-05	0.60963	0	0	11	6.43176e-05	0.00572275	PsychENCODE_eQTLs	NA	Yes	GM12878:Mesenchymal_Stem_Cell:Mesendoderm:hESC	1.754e-10	rs6864091	18
ENSG00000145703	IQGAP2	5	75699074	76003957	1	protein_coding	10788	IQGAP2	4.10295e-15	-0.157179	0	0	15	8.493e-11	0	eQTLGen_cis_eQTLs:eQTLGen_trans_eQTLs	NA	Yes	Liver:IMR90:Mesenchymal_Stem_Cell:Mesendoderm:Trophoblast-like_Cell:hESC	1.754e-10	rs6864091;rs3858704	18:45:00
ENSG00000164220	F2RL2	5	75911307	75919259	-1	protein_coding	2151	F2RL2	7.36707e-07	0.522212	0	0	12	0.000213816	0.0162169	PsychENCODE_eQTLs	NA	Yes	Mesenchymal_Stem_Cell:Mesendoderm:Trophoblast-like_Cell:hESC	1.754e-10	rs6864091	18
ENSG00000113319	RASGRF2	5	80256491	80525975	1	protein_coding	5924	RASGRF2	0.998743	-1.40016	0	0	4	1.6075e-07	0.00161943	eQTLGen_trans_eQTLs	NA	No	NA	NA	rs3858704	45
ENSG00000038427	VCAN	5	82767284	82878122	1	protein_coding	1462	VCAN	0.999751	-0.333731	0	0	4	2.7328e-07	0.00263552	eQTLGen_trans_eQTLs	NA	No	NA	NA	rs3858704	45
ENSG00000081189	MEF2C	5	88013975	88199922	-1	protein_coding	4208	MEF2C	0.00424617	-2.66223	0	0	8	1.6165e-13	0	eQTLGen_trans_eQTLs	NA	No	NA	0.003258	rs3858704	45
ENSG00000175471	MCTP1	5	94039446	94620279	-1	protein_coding	79772	MCTP1	0.00988912	-0.289821	0	0	2	1.963e-06	0.0150641	eQTLGen_trans_eQTLs	NA	No	NA	NA	rs3858704	45
ENSG00000164292	RHOBTB3	5	95049226	95160087	1	protein_coding	22836	RHOBTB3	0.000533732	1.04967	0	0	6	1.0748e-07	0.00120792	eQTLGen_trans_eQTLs	NA	No	NA	NA	rs3858704	45
ENSG00000205302	SNX2	5	122110691	122165803	1	protein_coding	6643	SNX2	0.997941	-0.365485	0	0	8	1.852e-12	0	eQTLGen_trans_eQTLs	NA	No	NA	0.003258	rs3858704	45
ENSG00000043143	JADE2	5	133860003	133918918	1	protein_coding	23338	JADE2	0.99931	-1.34998	0	0	3	NA	0.049	CMC_SVA_trans	NA	No	NA	NA	rs11788917	31
ENSG00000146021	KLHL3	5	136953189	137071779	-1	protein_coding	26249	KLHL3	0.924155	-1.18581	0	0	7	1.4602e-11	0	eQTLGen_trans_eQTLs	NA	No	NA	0.003258	rs3858704	45
ENSG00000044115	CTNNA1	5	137946656	138270723	1	protein_coding	1495	CTNNA1	0.970554	-0.172314	0	0	5	1.4632e-06	0.0114192	eQTLGen_trans_eQTLs	NA	No	NA	NA	rs3858704;rs2285626;rs12979148;rs7249692	1 day, 21:59:00
ENSG00000170476	MZB1	5	138723169	138725770	-1	protein_coding	51237	MZB1	0.00381145	-0.129029	0	0	8	5.8129e-13	0	eQTLGen_trans_eQTLs	NA	No	NA	0.003258	rs3858704	45
ENSG00000170458	CD14	5	140011313	140013286	-1	protein_coding	929	CD14	6.68637e-05	0.811868	0	0	2	3.2651e-06	0.0232716	eQTLGen_trans_eQTLs	NA	No	NA	6.015e-13	rs4665963;rs780095	9
ENSG00000146007	ZMAT2	5	140078265	140086248	1	protein_coding	153527	ZMAT2	0.971434	-0.225028	0	0	1	4.8819e-06	0.0323501	eQTLGen_trans_eQTLs	NA	No	NA	NA	rs3768320	1
ENSG00000156463	SH3RF2	5	145316142	145461354	1	protein_coding	153769	SH3RF2	1.79074e-11	-1.22579	0	0	5	1.0084e-06	0.00825449	eQTLGen_trans_eQTLs	NA	No	NA	NA	rs3858704	45
ENSG00000169252	ADRB2	5	148206156	148208196	1	protein_coding	154	ADRB2	0.476493	0.326414	0	0	1	2.4147e-06	0.0178999	eQTLGen_trans_eQTLs	NA	No	NA	0.003258	rs3858704	45
ENSG00000164284	GRPEL2	5	148724993	148734146	1	protein_coding	134266	GRPEL2	0.00575467	-1.14727	0	0	7	1.9358e-07	0.00194058	eQTLGen_trans_eQTLs	NA	No	NA	0.003258	rs3858704	45
ENSG00000113140	SPARC	5	151040657	151066726	-1	protein_coding	6678	SPARC	0.886494	0.0856778	0	0	1	6.6373e-06	0.0416748	eQTLGen_trans_eQTLs	NA	No	NA	0.01301	rs3858704	45
ENSG00000113263	ITK	5	156569944	156682201	1	protein_coding	3702	ITK	1.49551e-05	0.141883	0	0	4	1.0914e-06	0.00878837	eQTLGen_trans_eQTLs	NA	No	NA	NA	rs3858704	45
ENSG00000055163	CYFIP2	5	156693089	156822606	1	protein_coding	26999	CYFIP2	0.999999	NA	0	0	5	6.2671e-07	0.00552738	eQTLGen_trans_eQTLs	NA	No	NA	NA	rs3858704	45
ENSG00000164330	EBF1	5	158122928	158526769	-1	protein_coding	1879	EBF1	0.996264	0.544514	0	0	8	3.2283e-10	2.16873e-05	eQTLGen_trans_eQTLs	NA	No	NA	0.003258	rs3858704	45
ENSG00000135083	CCNJL	5	159678659	159772403	-1	protein_coding	79616	CCNJL	1.9475e-05	-0.684649	0	0	1	2.4723e-06	0.0182413	eQTLGen_trans_eQTLs	NA	No	NA	NA	rs4738080	27
ENSG00000145934	TENM2	5	166711804	167691162	1	protein_coding	57451	TENM2	0.999951	NA	66	21.1	27	1.4974e-05	4.13244e-08	PsychENCODE_eQTLs:GTEx/v8/Lung	NA	Yes	IMR90:Mesenchymal_Stem_Cell:Mesendoderm:hESC	6.018e-09	rs12188278	20
ENSG00000113742	CPEB4	5	173315283	173388979	1	protein_coding	80315	CPEB4	0.996855	-1.97623	0	0	1	8.242e-06	0.0495652	eQTLGen_trans_eQTLs	NA	No	NA	3.129e-09	rs2285626;rs7249692	59
ENSG00000146066	HIGD2A	5	175815748	175816772	1	protein_coding	192286	HIGD2A	0.238671	0.380602	0	0	6	7.8911e-08	0.000999201	eQTLGen_trans_eQTLs	NA	No	NA	3.177e-07	rs1727307;rs73231950	46
ENSG00000131187	F12	5	176829141	176836577	-1	protein_coding	2161	F12	3.46473e-06	-0.0799569	0	0	5	6.7463e-08	0.000852157	eQTLGen_trans_eQTLs	NA	No	NA	NA	rs3858704	45
ENSG00000112679	DUSP22	6	291630	351355	1	protein_coding	100653247	DUSP22	0.00430707	NA	0	0	8	1.2648e-09	5.72847e-05	eQTLGen_trans_eQTLs	NA	No	NA	0.003258	rs3858704	45
ENSG00000137265	IRF4	6	391739	411447	1	protein_coding	3662	IRF4	0.922221	2.34445	0	0	9	5.2e-26	0	eQTLGen_trans_eQTLs	NA	No	NA	0.003258	rs3858704	45
ENSG00000137267	TUBB2A	6	3153903	3157760	-1	protein_coding	7280	TUBB2A	NA	NA	0	0	1	2.2597e-07	0.0022	eQTLGen_trans_eQTLs	NA	No	NA	0.0009144	rs174547	39
ENSG00000239264	TXNDC5	6	7881483	8026646	-1	protein_coding	81567	TXNDC5	1.78543e-06	-0.0582922	0	0	2	1.6912e-06	0.0131048	eQTLGen_trans_eQTLs	NA	No	NA	NA	rs3858704	45
ENSG00000112149	CD83	6	14117872	14137149	1	protein_coding	9308	CD83	0.0177807	-0.0735049	0	0	5	6.518e-07	0.00571164	eQTLGen_trans_eQTLs	NA	No	NA	NA	rs3858704	45
ENSG00000007944	MYLIP	6	16129356	16148479	1	protein_coding	29116	MYLIP	0.0202269	NA	0	0	67	1.2201e-23	0	eQTLGen_trans_eQTLs	NA	No	NA	4e-229	rs6661669;rs56115463;rs2182869;rs4665963;rs780095;rs74446114;rs42129;rs1441760;rs4464984;rs78358410;rs308;rs2385114;rs651821;rs10892023;rs11604424;rs180326;rs3858704;rs17231506;rs7203984;rs11076174;rs118146573;rs12708980;rs820299	2:9:23:26:30:44:45:51
ENSG00000112062	MAPK14	6	35995488	36079013	1	protein_coding	1432	MAPK14	0.997467	-0.995766	0	0	5	3.8304e-07	0.00340121	eQTLGen_trans_eQTLs	NA	No	NA	NA	rs3858704	45
ENSG00000010030	ETV7	6	36322419	36356164	-1	protein_coding	51513	ETV7	2.00673e-08	0.118035	0	0	8	2.3147e-15	0	eQTLGen_trans_eQTLs	NA	No	NA	0.003258	rs3858704	45
ENSG00000124731	TREM1	6	41235664	41254457	-1	protein_coding	54210	TREM1	0.000343966	0.911954	0	0	7	1.768e-09	5.66465e-05	eQTLGen_trans_eQTLs	NA	No	NA	NA	rs3858704	45
ENSG00000112759	SLC29A1	6	44187242	44201888	1	protein_coding	2030	SLC29A1	0.964282	NA	0	0	6	5.243e-07	0.00459794	eQTLGen_trans_eQTLs	NA	No	NA	0.003258	rs3858704	45
ENSG00000180113	TDRD6	6	46655612	46672056	1	protein_coding	221400	TDRD6	6.46494e-23	-0.368328	0	0	2	6.5682e-11	0	eQTLGen_trans_eQTLs	NA	No	NA	1.599e-13	rs2245019	28
ENSG00000146070	PLA2G7	6	46671938	46703430	-1	protein_coding	7941	PLA2G7	8.02277e-11	0.0915417	0	0	2	4.6713e-19	0	eQTLGen_trans_eQTLs	NA	No	NA	1.599e-13	rs2245019	28
ENSG00000096093	EFHC1	6	52285106	52387892	1	protein_coding	114327	EFHC1	5.05958e-12	1.60649	0	0	6	2.5121e-07	0.00243931	eQTLGen_trans_eQTLs	NA	No	NA	0.003258	rs3858704	45
ENSG00000082293	COL19A1	6	70576463	70919679	1	protein_coding	1310	COL19A1	5.55032e-17	1.30528	0	0	3	1.8114e-06	0.0140991	eQTLGen_trans_eQTLs	NA	No	NA	NA	rs3858704	45
ENSG00000135318	NT5E	6	86159809	86205500	1	protein_coding	4907	NT5E	2.33634e-06	-0.469731	0	0	7	1.0051e-07	0.00112797	eQTLGen_trans_eQTLs	NA	No	NA	0.003258	rs3858704	45
ENSG00000111880	RNGTT	6	89319985	89673348	-1	protein_coding	8732	RNGTT	0.763456	0.0768624	0	0	8	1.8172e-13	0	eQTLGen_trans_eQTLs	NA	No	NA	0.003258	rs3858704	45
ENSG00000198833	UBE2J1	6	90036344	90062567	-1	protein_coding	51465	UBE2J1	0.857925	-0.139236	0	0	3	9.248e-07	0.00771563	eQTLGen_trans_eQTLs	NA	No	NA	0.003258	rs3858704	45
ENSG00000135535	CD164	6	109687717	109703762	-1	protein_coding	8763	CD164	0.401084	1.25902	0	0	21	9.9848e-08	0.00112826	eQTLGen_trans_eQTLs	NA	No	NA	2.255e-09	rs174547	39
ENSG00000112394	SLC16A10	6	111408781	111552397	1	protein_coding	117247	SLC16A10	0.067607	NA	0	0	5	6.3584e-07	0.00557794	eQTLGen_trans_eQTLs	NA	No	NA	NA	rs3858704	45
ENSG00000010810	FYN	6	111981535	112194655	-1	protein_coding	2534	FYN	0.995636	-0.355551	0	0	1	6.957e-06	0.0431739	eQTLGen_trans_eQTLs	NA	No	NA	5.984e-09	rs200054031;rs8047343	52
ENSG00000188820	FAM26F	6	116782533	116784934	1	protein_coding	441168	FAM26F	1.79932e-05	0.384834	0	0	5	4.4181e-07	0.00396671	eQTLGen_trans_eQTLs	NA	No	NA	NA	rs3858704	45
ENSG00000152894	PTPRK	6	128289924	128841870	-1	protein_coding	5796	PTPRK	0.980389	-0.479547	0	0	6	3.8709e-07	0.00342895	eQTLGen_trans_eQTLs	NA	No	NA	NA	rs3858704	45
ENSG00000164484	TMEM200A	6	130686879	130764208	1	protein_coding	114801	TMEM200A	0.835246	-0.0806799	0	0	4	3.4008e-06	0.0240032	eQTLGen_trans_eQTLs	NA	No	NA	NA	rs3858704	45
ENSG00000118520	ARG1	6	131894284	131905472	1	protein_coding	383	ARG1	0.000499883	-0.168128	0	0	2	5.9657e-06	0.0382916	eQTLGen_trans_eQTLs	NA	No	NA	3.129e-09	rs2285626;rs12979148;rs7249692	59
ENSG00000093134	VNN3	6	133043926	133055904	-1	protein_coding	NA	VNN3	0.0347314	NA	0	0	8	5.9485e-09	0.000134612	eQTLGen_trans_eQTLs	NA	No	NA	0.003258	rs3858704	45
ENSG00000118513	MYB	6	135502453	135540311	1	protein_coding	4602	MYB	0.881848	-0.468949	0	0	2	1.0593e-11	0	eQTLGen_trans_eQTLs	NA	No	NA	1.599e-13	rs2245019	28
ENSG00000171408	PDE7B	6	136172834	136516712	1	protein_coding	27115	PDE7B	0.946452	0.302893	0	0	4	1.3449e-06	0.0106253	eQTLGen_trans_eQTLs	NA	No	NA	0.003258	rs3858704	45
ENSG00000164506	STXBP5	6	147525561	147706866	1	protein_coding	134957	STXBP5	0.999992	NA	0	0	4	4.2859e-07	0.00385325	eQTLGen_trans_eQTLs	NA	No	NA	NA	rs3858704	45
ENSG00000111961	SASH1	6	148593440	148873186	1	protein_coding	23328	SASH1	0.00325444	-1.83989	0	0	5	1.5102e-08	0.00018865	eQTLGen_trans_eQTLs	NA	No	NA	NA	rs3858704	45
ENSG00000131016	AKAP12	6	151561134	151679692	1	protein_coding	9590	AKAP12	0.372502	0.743186	0	0	6	7.6379e-07	0.00648985	eQTLGen_trans_eQTLs	NA	No	NA	7.029e-54	rs1441760;rs78358410;rs308	26
ENSG00000146469	VIP	6	153071933	153080900	1	protein_coding	7432	VIP	0.00582894	-0.126612	0	0	1	NA	0.009	CMC_NoSVA_cis	NA	No	NA	NA	rs9479500	21
ENSG00000112031	MTRF1L	6	153308497	153323820	-1	protein_coding	54516	MTRF1L	4.39782e-07	-1.02232	0	0	80	4.0465e-38	0	EyeGEx:eQTLcatalogue/CEDAR_platelet:eQTLcatalogue/Fairfax_2014_IFN24:eQTLcatalogue/Fairfax_2014_LPS2:eQTLcatalogue/TwinsUK_ge_fat:eQTLcatalogue/TwinsUK_ge_LCL:eQTLcatalogue/TwinsUK_ge_skin:eQTLGen_cis_eQTLs:BIOSQTL/BIOS_eQTL_geneLevel:CMC_SVA_cis:CMC_NoSVA_cis:GTEx/v8/Adipose_Subcutaneous:GTEx/v8/Adipose_Visceral_Omentum:GTEx/v8/Adrenal_Gland:GTEx/v8/Whole_Blood:GTEx/v8/Artery_Aorta:GTEx/v8/Arter…	NA	Yes	IMR90:Mesenchymal_Stem_Cell:Mesendoderm:hESC	4.205e-12	rs9479500	21
ENSG00000091844	RGS17	6	153325594	153452384	-1	protein_coding	26575	RGS17	0.380684	-0.241391	217	15.61	203	5.3299e-67	0	TIGER/Nom_Alonso_Pancreatic_islets:eQTLcatalogue/GENCORD_ge_fibroblast:eQTLcatalogue/GEUVADIS_ge_LCL:eQTLcatalogue/Quach_2016_ge_monocyte_naive:eQTLcatalogue/TwinsUK_ge_fat:eQTLcatalogue/TwinsUK_ge_LCL:eQTLcatalogue/van_de_Bunt_2015_ge_pancreatic_islet:PsychENCODE_eQTLs:DICE/NK:eQTLGen_cis_eQTLs:GTEx/v8/Adipose_Subcutaneous:GTEx/v8/Adipose_Visceral_Omentum:GTEx/v8/Brain_Cerebellar_Hemisphere:GTEx…	NA	Yes	Left_Ventricle:IMR90:Mesenchymal_Stem_Cell:Mesendoderm:hESC	4.205e-12	rs9479500	21
ENSG00000074706	IPCEF1	6	154475631	154677926	-1	protein_coding	26034	IPCEF1	0.399941	0.163656	0	0	7	1.6769e-07	0.00165975	eQTLGen_trans_eQTLs	NA	Yes	Fetal_Cortex:IMR90:Mesenchymal_Stem_Cell:Mesendoderm:hESC	4.205e-12	rs3858704;rs9479500	21:45:00
ENSG00000092820	EZR	6	159186773	159240444	-1	protein_coding	7430	EZR	0.98811	1.08666	0	0	8	8.4714e-21	0	eQTLGen_trans_eQTLs	NA	No	NA	0.003258	rs3858704	45
ENSG00000164691	TAGAP	6	159455500	159466184	-1	protein_coding	117289	TAGAP	0.927103	2.45119	0	0	8	6.6264e-23	0	eQTLGen_trans_eQTLs	NA	No	NA	0.003258	rs3858704	45
ENSG00000026652	AGPAT4	6	161551011	161695093	-1	protein_coding	56895	AGPAT4	0.6745	0.748253	0	0	8	4.2443e-12	0	eQTLGen_trans_eQTLs	NA	No	NA	0.003258	rs3858704	45
ENSG00000213066	FGFR1OP	6	167412670	167466201	1	protein_coding	11116	FGFR1OP	0.710818	2.03149	0	0	1	3.7714e-06	0.0262592	eQTLGen_trans_eQTLs	NA	No	NA	0.01503	rs12787646	37
ENSG00000106460	TMEM106B	7	12250867	12282993	1	protein_coding	54664	TMEM106B	0.515078	3.38065	0	0	4	7.1223e-07	0.00614008	eQTLGen_trans_eQTLs	NA	No	NA	NA	rs3858704	45
ENSG00000106537	TSPAN13	7	16793160	16824161	1	protein_coding	27075	TSPAN13	0.609851	-0.0519861	0	0	7	7.5744e-10	2.0284e-05	eQTLGen_trans_eQTLs	NA	No	NA	0.003258	rs3858704	45
ENSG00000146592	CREB5	7	28338940	28865511	1	protein_coding	401317	CREB5	0.989845	-2.18421	0	0	4	1.4913e-06	0.011643	eQTLGen_trans_eQTLs	NA	No	NA	2.083e-13	rs4665963;rs780095;rs2285626;rs12979148;rs7249692	09:59:00
ENSG00000106066	CPVL	7	29034847	29235067	-1	protein_coding	54504	CPVL	4.06684e-07	-0.926507	0	0	6	6.5653e-07	0.00572574	eQTLGen_trans_eQTLs	NA	No	NA	NA	rs3858704	45
ENSG00000164543	STK17A	7	43622357	43666385	1	protein_coding	9263	STK17A	0.176185	0.77277	0	0	15	3.94035e-08	4.29396e-57	GTEx/v8/Heart_Atrial_Appendage:GTEx/v8/Skin_Sun_Exposed_Lower_leg:GTEx/v7/Heart_Atrial_Appendage	NA	No	NA	2.926e-20	rs62459064;rs55908146;rs730497;rs539022482	22
ENSG00000106603	COA1	7	43648055	43769316	-1	protein_coding	55744	COA1	0.0384625	-0.333845	0	0	16	6.1161e-08	5.31976e-35	eQTLGen_cis_eQTLs:GTEx/v8/Artery_Aorta:GTEx/v8/Artery_Tibial:GTEx/v8/Colon_Sigmoid:GTEx/v8/Esophagus_Gastroesophageal_Junction:GTEx/v7/Artery_Aorta:GTEx/v6/Artery_Aorta	NA	No	NA	3.454e-08	rs62459064;rs55908146	22
ENSG00000106605	BLVRA	7	43798279	43846939	1	protein_coding	644	BLVRA	0.083222	NA	0	0	10	1.1149e-06	0.00336982	DICE/T_CD4_naive_activated:eQTLGen_cis_eQTLs	NA	No	NA	1.593e-08	rs62459064;rs55908146	22
ENSG00000106608	URGCP	7	43915493	43966010	-1	protein_coding	55665	URGCP	0.20722	0.459939	0	0	39	4.0493e-14	0	eQTLcatalogue/Fairfax_2012_B-cell_CD19:eQTLGen_cis_eQTLs	NA	No	NA	3.043e-10	rs62459064;rs55908146;rs2300584;rs730497;rs13229610	22
ENSG00000078967	UBE2D4	7	43966037	43995735	1	protein_coding	51619	UBE2D4	0.00231861	-0.0592445	0	0	7	3.45808e-07	0.000248273	BIOSQTL/BIOS_eQTL_geneLevel:GTEx/v8/Brain_Cerebellar_Hemisphere	NA	No	NA	3.454e-08	rs62459064;rs55908146;rs13229610	22
ENSG00000136279	DBNL	7	44084239	44109055	1	protein_coding	102466985	DBNL	0.0709819	-0.159168	0	0	59	2.5269e-23	0	PsychENCODE_eQTLs:eQTLGen_cis_eQTLs:BIOSQTL/BIOS_eQTL_geneLevel:CMC_SVA_cis	NA	Yes	Promoter_anchored_loops:IMR90	1.612e-20	rs62459064;rs55908146;rs2300584;rs730497;rs13229610;rs539022482;rs13229610:rs730497:rs539022482:rs13229610:rs730497	22
ENSG00000164708	PGAM2	7	44102326	44105186	-1	protein_coding	5224	PGAM2	0.000842262	0.212722	0	0	14	1.61618e-07	2.48781e-05	PsychENCODE_eQTLs:BIOSQTL/BIOS_eQTL_geneLevel	NA	Yes	Adult_Cortex:Fetal_Cortex:IMR90	2.642e-20	rs62459064;rs55908146;rs2300584;rs55908146:rs13229610:rs730497;rs13229610:rs730497:rs539022482:rs730497;rs539022482	22
ENSG00000122678	POLM	7	44111846	44122139	-1	protein_coding	27434	POLM	2.42619e-08	NA	0	0	41	1.46e-78	0	EyeGEx:eQTLcatalogue/GEUVADIS_ge_LCL:eQTLcatalogue/Lepik_2017_ge_blood:eQTLGen_cis_eQTLs:BIOSQTL/BIOS_eQTL_geneLevel:GTEx/v8/Whole_Blood:GTEx/v8/Artery_Tibial:GTEx/v8/Colon_Transverse:GTEx/v8/Esophagus_Mucosa:GTEx/v8/Lung:GTEx/v8/Nerve_Tibial:GTEx/v8/Prostate:GTEx/v8/Cells_Cultured_fibroblasts:GTEx/v8/Skin_Not_Sun_Exposed_Suprapubic:GTEx/v8/Skin_Sun_Exposed_Lower_leg:GTEx/v8/Stomach:GTEx/v8/Thyro…	NA	Yes	Promoter_anchored_loops:IMR90:Mesenchymal_Stem_Cell	1.612e-20	rs62459064;rs55908146;rs2300584;rs730497;rs13229610;rs55908146:rs62459064;rs55908146:rs730497;rs13229610:rs730497:rs539022482:rs13229610:rs62459064:rs2300584:rs62459064;rs2300584:rs730497;rs539022482	22
ENSG00000106624	AEBP1	7	44143960	44154161	1	protein_coding	165	AEBP1	0.000218799	NA	15	13.48	70	2.4809e-52	0	eQTLcatalogue/Alasoo_2018_ge_macrophage_Salmonella:eQTLcatalogue/Fairfax_2012_B-cell_CD19:eQTLcatalogue/TwinsUK_ge_LCL:PsychENCODE_eQTLs:DICE/B_cell_naive:eQTLGen_cis_eQTLs:BIOSQTL/BIOS_eQTL_geneLevel:xQTLServer_eQTLs:CMC_SVA_cis:CMC_NoSVA_cis:GTEx/v8/Adipose_Subcutaneous:GTEx/v8/Adipose_Visceral_Omentum:GTEx/v8/Artery_Aorta:GTEx/v8/Artery_Coronary:GTEx/v8/Brain_Anterior_cingulate_cortex_BA24:GTE…	NA	Yes	Adult_Cortex:Fetal_Cortex:IMR90:Mesenchymal_Stem_Cell	1.612e-20	rs62459064;rs55908146;rs2300584;rs13229610;rs730497:rs730497;rs13229610:rs13229610:rs62459064:rs2300584:rs62459064;rs2300584:rs539022482:rs730497;rs539022482	22
ENSG00000106628	POLD2	7	44154286	44163957	-1	protein_coding	5425	POLD2	0.0443244	-0.501179	17	13.48	32	5.90204e-19	1.24145e-21	eQTLcatalogue/BrainSeq_ge_brain:eQTLcatalogue/Fairfax_2014_IFN24:eQTLcatalogue/TwinsUK_ge_fat:PsychENCODE_eQTLs:eQTLGen_cis_eQTLs:BIOSQTL/BIOS_eQTL_geneLevel:CMC_SVA_cis:BRAINEAC/OCTX:BRAINEAC/TCTX:GTEx/v8/Adipose_Subcutaneous:GTEx/v8/Adipose_Visceral_Omentum:GTEx/v8/Brain_Amygdala:GTEx/v8/Brain_Anterior_cingulate_cortex_BA24:GTEx/v8/Brain_Cortex:GTEx/v8/Brain_Frontal_Cortex_BA9:GTEx/v8/Brain_Hip…	NA	Yes	Promoter_anchored_loops:Adult_Cortex:Fetal_Cortex	2.642e-20	rs55908146;rs62459064;rs13229610;rs2300584;rs55908146:rs62459064;rs55908146:rs2300584:rs13229610:rs730497;rs13229610:rs730497	22
ENSG00000106631	MYL7	7	44178463	44180931	-1	protein_coding	58498	MYL7	3.65495e-06	-0.192921	28	12.25	24	5.7616e-10	1.1978e-05	eQTLcatalogue/BrainSeq_ge_brain:PsychENCODE_eQTLs:BIOSQTL/BIOS_eQTL_geneLevel:GTEx/v8/Brain_Cerebellar_Hemisphere:GTEx/v8/Brain_Hypothalamus:GTEx/v8/Brain_Nucleus_accumbens_basal_ganglia:GTEx/v8/Pituitary:GTEx/v7/Brain_Hypothalamus:GTEx/v7/Brain_Nucleus_accumbens_basal_ganglia	NA	Yes	Promoter_anchored_loops:Adult_Cortex	3.043e-10	rs55908146;rs62459064;rs2300584;rs55908146:rs62459064	22
ENSG00000106633	GCK	7	44183872	44237769	-1	protein_coding	2645	GCK	0.204306	-0.265833	78	16.3	79	1.75624e-50	0	eQTLcatalogue/GENCORD_ge_T-cell:PsychENCODE_eQTLs:DICE/T_CD4_naive:DICE/T_CD8_naive:DICE/T_CD4_TFH:DICE/T_CD4_TH1:DICE/T_CD4_TH17:DICE/T_CD4_TH1_17:eQTLGen_cis_eQTLs:BIOSQTL/BIOS_eQTL_geneLevel:GTEx/v8/Adipose_Subcutaneous:GTEx/v8/Adipose_Visceral_Omentum:GTEx/v8/Artery_Aorta:GTEx/v8/Artery_Coronary:GTEx/v8/Artery_Tibial:GTEx/v8/Breast_Mammary_Tissue:GTEx/v8/Colon_Sigmoid:GTEx/v8/Esophagus_Gastro…	NA	Yes	Promoter_anchored_loops:Adult_Cortex:Fetal_Cortex:IMR90	1.612e-20	rs62459064;rs55908146;rs2300584;rs13229610;rs730497;rs539022482;rs55908146:rs62459064;rs55908146:rs62459064:rs2300584:rs62459064;rs2300584:rs730497;rs13229610:rs730497:rs539022482:rs13229610	22
ENSG00000106636	YKT6	7	44240567	44253893	1	protein_coding	10652	YKT6	0.852902	0.724479	28	14.19	61	8.67413e-14	7.94588e-31	EyeGEx:eQTLcatalogue/BLUEPRINT_ge_monocyte:eQTLcatalogue/GENCORD_ge_fibroblast:eQTLcatalogue/Quach_2016_ge_monocyte_IAV:eQTLcatalogue/Quach_2016_ge_monocyte_LPS:eQTLcatalogue/Quach_2016_ge_monocyte_Pam3CSK4:eQTLcatalogue/Quach_2016_ge_monocyte_R848:PsychENCODE_eQTLs:GTEx/v8/Adipose_Subcutaneous:GTEx/v8/Artery_Aorta:GTEx/v8/Artery_Tibial:GTEx/v8/Colon_Sigmoid:GTEx/v8/Esophagus_Gastroesophageal_Jun…	NA	Yes	Promoter_anchored_loops:Adult_Cortex:Fetal_Cortex:IMR90:Mesenchymal_Stem_Cell	1.612e-20	rs13229610;rs730497;rs539022482;rs55908146;rs62459064;rs2300584;rs55908146:rs62459064;rs55908146:rs62459064:rs2300584:rs62459064	22
ENSG00000058404	CAMK2B	7	44256749	44374176	-1	protein_coding	816	CAMK2B	0.46862	-1.28088	23	14.19	10	3.53397e-12	1.02658e-07	EyeGEx:PsychENCODE_eQTLs:GTEx/v8/Brain_Anterior_cingulate_cortex_BA24:GTEx/v8/Brain_Cerebellar_Hemisphere:GTEx/v8/Brain_Cerebellum:GTEx/v8/Brain_Cortex:GTEx/v8/Brain_Frontal_Cortex_BA9:GTEx/v8/Brain_Hypothalamus:GTEx/v8/Brain_Nucleus_accumbens_basal_ganglia:GTEx/v8/Brain_Putamen_basal_ganglia:GTEx/v7/Brain_Cortex:GTEx/v7/Brain_Frontal_Cortex_BA9:GTEx/v7/Brain_Hypothalamus:GTEx/v6/Brain_Cortex:GTE…	NA	Yes	IMR90:Mesenchymal_Stem_Cell	2.642e-20	rs13229610;rs730497;rs539022482;rs730497:rs730497;rs13229610:rs13229610:rs539022482:rs730497	22
ENSG00000015676	NUDCD3	7	44418720	44530479	-1	protein_coding	23386	NUDCD3	0.706732	-1.64544	0	0	40	1.6315e-09	3.18128e-19	eQTLcatalogue/BLUEPRINT_ge_T-cell:eQTLGen_cis_eQTLs:BIOSQTL/BIOS_eQTL_geneLevel:GTEx/v8/Cells_Cultured_fibroblasts	NA	Yes	Promoter_anchored_loops:Adult_Cortex:Fetal_Cortex:Spleen:IMR90:Mesenchymal_Stem_Cell	1.612e-20	rs13229610;rs62459064;rs730497;rs539022482;rs13229610:rs730497:rs539022482:rs13229610:rs62459064;rs55908146:rs730497	22
ENSG00000158604	TMED4	7	44617493	44621886	-1	protein_coding	222068	TMED4	0.292928	0.480385	0	0	26	8.3144e-11	0	eQTLGen_cis_eQTLs	NA	Yes	Liver:GM12878:IMR90:Mesenchymal_Stem_Cell:Mesendoderm:Trophoblast-like_Cell	1.612e-20	rs62459064;rs13229610;rs730497;rs539022482;rs730497:rs730497;rs13229610:rs13229610:rs539022482:rs730497	22
ENSG00000105953	OGDH	7	44646171	44748665	1	protein_coding	4967	OGDH	0.993695	-0.0701961	0	0	19	5.32875e-07	0.00266438	eQTLcatalogue/CEDAR_T-cell_CD4	NA	No	NA	3.043e-10	rs62459064;rs55908146	22
ENSG00000122515	ZMIZ2	7	44788180	44809477	1	protein_coding	83637	ZMIZ2	0.99962	0.416826	0	0	1	2.7161e-06	0.00782082	eQTLGen_cis_eQTLs	NA	No	NA	1.483e-11	rs13229610	22
ENSG00000196262	PPIA	7	44836279	44864163	1	protein_coding	101060363	PPIA	0.808049	0.430905	0	0	1	2.4918e-05	0.0318458	GTEx/v7/Colon_Transverse	NA	Yes	Adult_Cortex:Fetal_Cortex	2.642e-20	rs730497;rs13229610;rs62459064:rs2300584:rs62459064;rs2300584:rs13229610:rs730497;rs13229610:rs730497:rs539022482:rs62459064;rs55908146	22
ENSG00000183696	UPP1	7	48128225	48148330	1	protein_coding	7378	UPP1	9.00845e-05	-0.189383	0	0	8	1.4711e-17	0	eQTLGen_trans_eQTLs	NA	No	NA	0.003258	rs3858704	45
ENSG00000106070	GRB10	7	50657760	50861159	-1	protein_coding	2887	GRB10	0.367424	-0.760993	0	0	7	2.2259e-09	7.42253e-05	eQTLGen_trans_eQTLs	NA	No	NA	0.003258	rs3858704	45
ENSG00000169902	TPST1	7	65670186	65885530	1	protein_coding	8460	TPST1	0.0114811	-0.81713	0	0	4	2.9284e-07	0.00275846	eQTLGen_trans_eQTLs	NA	No	NA	3.129e-09	rs55823486;rs2285626;rs12979148;rs7249692	59
ENSG00000196313	POM121	7	72349936	72421979	1	protein_coding	9883	POM121	NA	-1.37062	1	0.733	72	9.13559e-20	1.50688e-66	EyeGEx:eQTLGen_cis_eQTLs:GTEx/v8/Adipose_Subcutaneous:GTEx/v8/Adipose_Visceral_Omentum:GTEx/v8/Whole_Blood:GTEx/v8/Artery_Aorta:GTEx/v8/Artery_Coronary:GTEx/v8/Artery_Tibial:GTEx/v8/Brain_Frontal_Cortex_BA9:GTEx/v8/Breast_Mammary_Tissue:GTEx/v8/Colon_Sigmoid:GTEx/v8/Colon_Transverse:GTEx/v8/Esophagus_Gastroesophageal_Junction:GTEx/v8/Esophagus_Mucosa:GTEx/v8/Esophagus_Muscularis:GTEx/v8/Heart_Atr…	NA	Yes	Promoter_anchored_loops	9.554e-11	rs71556729;rs42129;rs42129:rs71556729:rs42129	23
ENSG00000155428	TRIM74	7	72430016	72439997	-1	protein_coding	378108	TRIM74	0.780334	-0.947438	0	0	25	9.8062e-13	0	eQTLGen_cis_eQTLs	NA	Yes	Promoter_anchored_loops	9.554e-11	rs42129;rs42129:rs71556729	23
ENSG00000267985	AC005488.1	7	72459478	72464996	1	protein_coding	NA	NA	NA	NA	0	0	39	2.7652e-10	0	eQTLGen_cis_eQTLs	NA	No	NA	1.927e-08	rs71556729;rs42129	23
ENSG00000130305	NSUN5	7	72716514	72722864	-1	protein_coding	55695	NSUN5	1.45415e-06	-0.276519	1	9.102	15	8.67626e-06	0.0433813	eQTLcatalogue/TwinsUK_ge_fat	NA	Yes	Promoter_anchored_loops:Spleen:IMR90:Mesenchymal_Stem_Cell:Mesendoderm	1.47e-07	rs42129;rs71556729:rs42129:rs71556729	23
ENSG00000146755	TRIM50	7	72726535	72742085	-1	protein_coding	135892	TRIM50	2.72562e-06	-0.790239	4	9.102	79	3.93351e-26	0	DICE/T_CD4_naive_TREG:BIOSQTL/BIOS_eQTL_geneLevel:GTEx/v8/Artery_Tibial:GTEx/v8/Brain_Cerebellum:GTEx/v8/Nerve_Tibial:GTEx/v8/Prostate:GTEx/v8/Skin_Not_Sun_Exposed_Suprapubic:GTEx/v8/Thyroid:GTEx/v7/Brain_Caudate_basal_ganglia:GTEx/v7/Nerve_Tibial:GTEx/v7/Prostate:GTEx/v7/Skin_Not_Sun_Exposed_Suprapubic:GTEx/v7/Thyroid:GTEx/v6/Nerve_Tibial	NA	Yes	Promoter_anchored_loops:EP_correlation_cell_type_oneway:Spleen:IMR90:Mesenchymal_Stem_Cell:Mesendoderm	9.554e-11	rs42129;rs71556729;rs71556729:rs42129:rs42129	23
ENSG00000077800	FKBP6	7	72742167	72772634	1	protein_coding	8468	FKBP6	0.130601	-0.334522	18	6.646	0	NA	NA	NA	NA	Yes	Promoter_anchored_loops:EP_correlation_cell_type_oneway:Spleen:IMR90:Mesenchymal_Stem_Cell:Mesendoderm	9.554e-11	rs42129;rs71556729:rs42129:rs42129;rs71556729	23
ENSG00000188763	FZD9	7	72848109	72850450	1	protein_coding	8326	FZD9	NA	NA	6	2.185	46	1.11764e-10	1.64815e-07	PsychENCODE_eQTLs:CMC_SVA_cis:GTEx/v8/Nerve_Tibial:GTEx/v8/Spleen:GTEx/v7/Nerve_Tibial	NA	Yes	Promoter_anchored_loops:Spleen:GM12878:IMR90:Mesenchymal_Stem_Cell:Mesendoderm:Trophoblast-like_Cell:hESC	9.554e-11	rs71556729;rs42129;rs71556729:rs42129	23
ENSG00000009954	BAZ1B	7	72854728	72936608	-1	protein_coding	9031	BAZ1B	1	-1.10698	28	8.812	50	9.3874e-08	1.08361e-07	eQTLGen_cis_eQTLs:GTEx/v8/Colon_Sigmoid:GTEx/v8/Skin_Sun_Exposed_Lower_leg:GTEx/v8/Thyroid:GTEx/v7/Adipose_Subcutaneous	NA	Yes	Promoter_anchored_loops:Adult_Cortex:Fetal_Cortex:GM12878:IMR90:Mesenchymal_Stem_Cell:Mesendoderm:Trophoblast-like_Cell:hESC	1.927e-08	rs42129;rs71556729;rs42129:rs42129;rs71556729:rs71556729	23
ENSG00000106635	BCL7B	7	72950686	72972332	-1	protein_coding	9275	BCL7B	0.706637	-0.386261	5	14.54	86	8.4286e-19	0	TIGER/Nom_Alonso_Pancreatic_islets:EyeGEx:eQTLcatalogue/Alasoo_2018_ge_macrophage_IFNg_Salmonella:eQTLcatalogue/Alasoo_2018_ge_macrophage_Salmonella:eQTLcatalogue/BLUEPRINT_ge_T-cell:eQTLcatalogue/Kasela_2017_T-cell_CD4:eQTLcatalogue/Kasela_2017_T-cell_CD8:eQTLcatalogue/Quach_2016_ge_monocyte_IAV:eQTLcatalogue/Quach_2016_ge_monocyte_LPS:eQTLcatalogue/Quach_2016_ge_monocyte_Pam3CSK4:eQTLGen_cis_eQ…	NA	Yes	Promoter_anchored_loops:Adult_Cortex:Fetal_Cortex	9.554e-11	rs42129;rs71556729;rs42129:rs71556729	23
ENSG00000106638	TBL2	7	72983262	72993121	-1	protein_coding	26608	TBL2	0.00437651	8.9213	16	8.402	88	3.55546e-08	4.93874e-46	eQTLcatalogue/TwinsUK_ge_skin:eQTLGen_cis_eQTLs:GTEx/v8/Artery_Tibial:GTEx/v8/Heart_Atrial_Appendage:GTEx/v8/Nerve_Tibial:GTEx/v8/Cells_Cultured_fibroblasts:GTEx/v8/Skin_Not_Sun_Exposed_Suprapubic:GTEx/v7/Heart_Atrial_Appendage	NA	Yes	Promoter_anchored_loops	9.554e-11	rs42129;rs71556729	23
ENSG00000009950	MLXIPL	7	73007524	73038873	-1	protein_coding	51085	MLXIPL	0.676823	0.477224	40	19.09	120	5.2881e-56	2.92924e-48	EyeGEx:eQTLcatalogue/TwinsUK_ge_fat:eQTLcatalogue/TwinsUK_ge_skin:GTEx/v8/Adipose_Subcutaneous:GTEx/v8/Adipose_Visceral_Omentum:GTEx/v8/Artery_Aorta:GTEx/v8/Breast_Mammary_Tissue:GTEx/v8/Colon_Sigmoid:GTEx/v8/Colon_Transverse:GTEx/v8/Esophagus_Gastroesophageal_Junction:GTEx/v8/Esophagus_Mucosa:GTEx/v8/Esophagus_Muscularis:GTEx/v8/Heart_Atrial_Appendage:GTEx/v8/Heart_Left_Ventricle:GTEx/v8/Lung:GT…	NA	Yes	Promoter_anchored_loops:EP_correlation_cell_type_oneway:Adult_Cortex	9.554e-11	rs42129;rs71556729;rs42129:rs71556729	23
ENSG00000176428	VPS37D	7	73082155	73086442	1	protein_coding	155382	VPS37D	0.656347	NA	3	13.47	51	9.27309e-08	5.42176e-07	CMC_SVA_cis:GTEx/v8/Adipose_Subcutaneous:GTEx/v8/Artery_Aorta:GTEx/v7/Artery_Aorta	NA	Yes	Promoter_anchored_loops:Adult_Cortex:Fetal_Cortex	2.033e-07	rs71556729;rs42129;rs42129:rs71556729	23
ENSG00000176410	DNAJC30	7	73095299	73097783	-1	protein_coding	84277	DNAJC30	0.00479828	0.303308	4	13.47	4	3.6567e-06	0.0105774	eQTLGen_cis_eQTLs	NA	Yes	Promoter_anchored_loops	2.033e-07	rs71556729;rs42129	23
ENSG00000071462	WBSCR22	7	73097355	73119491	1	protein_coding	114049	WBSCR22	0.521152	NA	4	10.38	23	5.5032e-52	0	eQTLcatalogue/CEDAR_neutrophil_CD15:eQTLcatalogue/Fairfax_2014_naive:PsychENCODE_eQTLs:eQTLGen_cis_eQTLs:BIOSQTL/BIOS_eQTL_geneLevel	NA	Yes	Promoter_anchored_loops	1.883e-10	rs71556729;rs42129	23
ENSG00000106089	STX1A	7	73113536	73134002	-1	protein_coding	6804	STX1A	0.910476	-0.0705192	2	10.38	2	1.62373e-05	0.00913525	PsychENCODE_eQTLs:GTEx/v8/Skin_Not_Sun_Exposed_Suprapubic	NA	Yes	Promoter_anchored_loops	1.883e-10	rs71556729;rs42129	23
ENSG00000106077	ABHD11	7	73150424	73153197	-1	protein_coding	83451	ABHD11	9.03291e-06	0.148518	1	0.008	3	1.6534e-07	0.000550241	eQTLGen_cis_eQTLs:GTEx/v7/Prostate	NA	Yes	Promoter_anchored_loops	2.797e-10	rs71556729;rs42129;rs42129:rs71556729	23
ENSG00000165171	WBSCR27	7	73248920	73256865	-1	protein_coding	155368	WBSCR27	0.0679117	NA	0	0	5	4.2883e-15	0	PsychENCODE_eQTLs:eQTLGen_cis_eQTLs	NA	Yes	Promoter_anchored_loops:IMR90	1.883e-10	rs42129;rs71556729;rs42129:rs71556729	23
ENSG00000086730	LAT2	7	73613982	73644161	1	protein_coding	7462	LAT2	0.000691063	-0.479097	0	0	2	3.675e-08	0.000152333	eQTLGen_cis_eQTLs	NA	No	NA	9.533e-06	rs71556729	23
ENSG00000006704	GTF2IRD1	7	73868120	74016931	1	protein_coding	9569	GTF2IRD1	0.996434	NA	0	0	33	2.31668e-06	0.00270679	GTEx/v7/Skin_Sun_Exposed_Lower_leg	NA	No	NA	0.0001546	rs42129	23
ENSG00000077809	GTF2I	7	74071994	74175026	1	protein_coding	2969	GTF2I	0.999349	NA	0	0	2	1.8569e-06	0.00543696	PsychENCODE_eQTLs:eQTLGen_cis_eQTLs	NA	No	NA	9.533e-06	rs71556729	23
ENSG00000186088	GSAP	7	76940068	77045717	-1	protein_coding	54103	GSAP	3.59526e-16	NA	0	0	7	6.0202e-08	0.000806341	eQTLGen_trans_eQTLs	NA	No	NA	0.003258	rs3858704	45
ENSG00000127955	GNAI1	7	79763271	79848718	1	protein_coding	2770	GNAI1	0.917528	0.288401	2	0.187	0	NA	NA	NA	NA	Yes	Adult_Cortex:Fetal_Cortex:Adrenal:Aorta:Hippocampus:Left_Ventricle:Liver:Right_Ventricle:IMR90:Mesenchymal_Stem_Cell:Mesendoderm:Neural_Progenitor_Cell:Trophoblast-like_Cell:hESC	1.437e-09	rs531971155;rs531971155:rs75326924	24
ENSG00000135218	CD36	7	79998891	80308593	1	protein_coding	948	CD36	8.31103e-46	-0.121665	17	27	0	NA	NA	NA	NA	Yes	Left_Ventricle:IMR90:Mesenchymal_Stem_Cell	1.437e-09	rs531971155;rs75326924;rs531971155:rs75326924	24
ENSG00000214415	GNAT3	7	80087987	80141336	-1	protein_coding	346562	GNAT3	0.000297548	0.0437258	2	3.974	0	NA	NA	NA	NA	Yes	Left_Ventricle:Right_Ventricle:IMR90:Mesenchymal_Stem_Cell:Mesendoderm:hESC	1.437e-09	rs75326924;rs531971155;rs75326924:rs531971155	24
ENSG00000075223	SEMA3C	7	80371854	80551675	-1	protein_coding	10512	SEMA3C	0.296856	-0.134329	8	18.53	0	NA	NA	NA	NA	Yes	Left_Ventricle:IMR90:Mesenchymal_Stem_Cell:Mesendoderm:Neural_Progenitor_Cell:Trophoblast-like_Cell:hESC	1.437e-09	rs531971155;rs75326924;rs75326924:rs531971155	24
ENSG00000177409	SAMD9L	7	92759368	92777682	-1	protein_coding	219285	SAMD9L	3.79852e-10	0.389889	0	0	3	4.7091e-07	0.00416577	eQTLGen_trans_eQTLs	NA	No	NA	NA	rs3858704	45
ENSG00000127990	SGCE	7	94214542	94285521	-1	protein_coding	8910	SGCE	0.00138632	NA	0	0	4	2.9945e-06	0.0215276	eQTLGen_trans_eQTLs	NA	No	NA	NA	rs3858704	45
ENSG00000164715	LMTK2	7	97736197	97838945	1	protein_coding	22853	LMTK2	0.994402	0.167448	0	0	5	1.8402e-07	0.0017954	eQTLGen_trans_eQTLs	NA	No	NA	NA	rs3858704	45
ENSG00000135272	MDFIC	7	114562209	114659256	1	protein_coding	29969	MDFIC	NA	-1.32194	0	0	7	4.4375e-09	0.000104858	eQTLGen_trans_eQTLs	NA	No	NA	0.003258	rs3858704	45
ENSG00000105971	CAV2	7	115927434	116148595	1	protein_coding	858	CAV2	0.00411638	0.222321	0	0	3	6.5921e-09	0.000134816	eQTLGen_trans_eQTLs	NA	No	NA	1.65e-11	rs2285626;rs12979148;rs7249692	59
ENSG00000172331	BPGM	7	134331560	134364565	1	protein_coding	669	BPGM	0.126322	-0.197315	0	0	6	1.4142e-07	0.00154344	eQTLGen_trans_eQTLs	NA	No	NA	2.31e-14	rs58434384;rs6065904;rs435306	59:62
ENSG00000064393	HIPK2	7	139246316	139477577	-1	protein_coding	28996	HIPK2	0.998346	NA	0	0	6	3.2421e-07	0.00294283	eQTLGen_trans_eQTLs	NA	No	NA	0.003258	rs3858704	45
ENSG00000006530	AGK	7	141250989	141355044	1	protein_coding	55750	AGK	2.47068e-06	-0.811016	0	0	4	1.6896e-07	0.00168231	eQTLGen_trans_eQTLs	NA	No	NA	NA	rs3858704	45
ENSG00000146904	EPHA1	7	143087382	143105985	-1	protein_coding	2041	EPHA1	5.30365e-11	0.0658929	0	0	8	3.049e-08	0.000394795	eQTLGen_trans_eQTLs	NA	No	NA	0.003258	rs3858704	45
ENSG00000174469	CNTNAP2	7	145813453	148118090	1	protein_coding	26047	CNTNAP2	3.82883e-05	1.4988	0	0	3	4.9583e-08	0.000668431	eQTLGen_trans_eQTLs	NA	No	NA	0.003258	rs3858704	45
ENSG00000133561	GIMAP6	7	150322463	150329473	-1	protein_coding	474344	GIMAP6	0.0973436	-0.343367	0	0	3	3.9613e-06	0.027232	eQTLGen_trans_eQTLs	NA	No	NA	NA	rs3858704	45
ENSG00000196329	GIMAP5	7	150419341	150447121	1	protein_coding	100527949	GIMAP5	0.189192	1.78359	0	0	5	6.4881e-08	0.000828467	eQTLGen_trans_eQTLs	NA	No	NA	NA	rs3858704	45
ENSG00000013374	NUB1	7	151038785	151075535	1	protein_coding	51667	NUB1	1.14913e-05	0.43882	0	0	5	2.2858e-10	0	eQTLGen_trans_eQTLs	NA	No	NA	NA	rs3858704	45
ENSG00000186480	INSIG1	7	155089486	155101945	1	protein_coding	3638	INSIG1	0.124544	-0.786491	0	0	37	8.1321e-12	0	eQTLGen_trans_eQTLs	NA	No	NA	2.255e-09	rs174547;rs3858704	1 day, 15:45:00
ENSG00000182319	SGK223	8	8175258	8244008	-1	protein_coding	157285	NA	5.12369e-20	NA	0	0	5	6.5026e-08	0.000828242	eQTLGen_trans_eQTLs	NA	No	NA	NA	rs3858704	45
ENSG00000136573	BLK	8	11351510	11422113	1	protein_coding	640	BLK	2.86166e-07	-0.273662	0	0	8	4.5343e-15	0	eQTLGen_trans_eQTLs	NA	No	NA	0.003258	rs3858704	45
ENSG00000079459	FDFT1	8	11653082	11696818	1	protein_coding	2222	FDFT1	NA	1.28566	0	0	32	2.358e-09	7.36377e-05	eQTLGen_trans_eQTLs	NA	No	NA	5.878e-77	rs1441760;rs78358410;rs10106652;rs174547;rs7203984;rs12708980;rs11076174;rs118146573	1 day, 2:39:51
ENSG00000104213	PDGFRL	8	17433942	17501580	1	protein_coding	5157	PDGFRL	4.16905e-10	-0.322794	0	0	7	2.36542e-05	1.48363e-07	GTEx/v8/Testis	NA	No	NA	2.994e-06	rs35246381	25
ENSG00000129422	MTUS1	8	17501304	17658426	-1	protein_coding	57509	MTUS1	1.14383e-05	2.01981	0	0	12	2.9082e-06	0.00848309	eQTLGen_cis_eQTLs	NA	No	NA	0.0001775	rs35246381	25
ENSG00000104760	FGL1	8	17721889	17767874	-1	protein_coding	2267	FGL1	1.87354e-16	1.26396	0	0	2	5.14121e-06	0.025706	eQTLcatalogue/CEDAR_T-cell_CD8	NA	No	NA	0.0005592	rs35246381	25
ENSG00000078674	PCM1	8	17780349	17885478	1	protein_coding	5108	PCM1	NA	0.181265	0	0	5	1.4086e-12	0	eQTLGen_cis_eQTLs	NA	No	NA	0.002033	rs35246381	25
ENSG00000104763	ASAH1	8	17913934	17942494	-1	protein_coding	427	ASAH1	5.35815e-11	2.32447	0	0	31	6.019e-12	0	eQTLGen_cis_eQTLs	NA	Yes	IMR90:Mesenchymal_Stem_Cell	6.107e-10	rs35246381;rs35246381:rs75218485:rs2119693:rs118099376	1 day, 1:26:00
ENSG00000156006	NAT2	8	18248755	18258728	1	protein_coding	10	NAT2	0.0226079	0.267315	49	14.24	34	5.40254e-08	0.000112937	PsychENCODE_eQTLs:GTEx/v8/Brain_Nucleus_accumbens_basal_ganglia:GTEx/v8/Heart_Left_Ventricle:GTEx/v8/Testis:GTEx/v7/Testis:GTEx/v6/Heart_Left_Ventricle	NA	Yes	Left_Ventricle:IMR90:Mesenchymal_Stem_Cell:Mesendoderm:Trophoblast-like_Cell:hESC	5.802e-42	rs35246381;rs35246381:rs7012658:rs10106652:rs1441760;rs78358410;rs10106652:rs75218485:rs4464984:rs4464984;rs10106652:rs2119693:rs1441771;rs2119693:rs74304285;rs1441771:rs74304285;rs1441771;rs7012719;rs2119693:rs7012719:rs74304285;rs2119693:rs1441771:rs188385627	1 day, 1:26:00
ENSG00000156011	PSD3	8	18384811	18942240	-1	protein_coding	23362	PSD3	0.851706	1.35431	0	0	11	9.39589e-08	4.23156e-14	eQTLcatalogue/Fairfax_2014_LPS24:GTEx/v8/Brain_Substantia_nigra:GTEx/v8/Skin_Sun_Exposed_Lower_leg:GTEx/v6/Esophagus_Muscularis	NA	Yes	Aorta:Left_Ventricle:IMR90:Mesenchymal_Stem_Cell:Mesendoderm:Trophoblast-like_Cell:hESC	8.472e-51	rs2119693;rs4464984;rs308;rs7012658;rs1441760;rs78358410;rs308:rs7012658:rs4464984;rs73208819:rs1441760;rs7012658:rs73208819:rs308:rs10106652:rs75218485:rs78358410:rs4464984:rs1441760;rs10106652:rs4464984;rs10106652:rs118099376:rs78358410;rs10106652:rs2119693	26
ENSG00000104611	SH2D4A	8	19171128	19253729	1	protein_coding	63898	SH2D4A	1.53114e-18	-0.0833182	0	0	12	6.29768e-06	0.049	DICE/T_CD8_naive	NA	Yes	IMR90:Mesenchymal_Stem_Cell:Mesendoderm:Trophoblast-like_Cell:hESC	2.157e-59	rs1441760;rs7012658;rs4464984;rs2119693:rs75218485:rs118099376:rs1441771;rs2119693:rs74304285;rs1441771:rs74304285;rs1441771;rs7012719;rs2119693:rs7012719:rs74304285;rs2119693:rs1441771:rs188385627:rs4464984:rs4464984;rs78358410:rs1441760;rs78358410;rs308:rs308:rs78358410:rs1441760;rs7012658:rs78358410;rs75218485:rs1441760;rs4464984:rs1441760:rs4464984;rs10106652:rs7012658:rs4464984;rs73208819:rs…	26
ENSG00000147408	CSGALNACT1	8	19261672	19615540	-1	protein_coding	55790	CSGALNACT1	6.87751e-05	0.406271	0	0	324	2.219e-158	0	eQTLcatalogue/BLUEPRINT_ge_neutrophil:eQTLcatalogue/GENCORD_ge_fibroblast:eQTLcatalogue/Lepik_2017_ge_blood:eQTLGen_cis_eQTLs:GTEx/v8/Whole_Blood:GTEx/v8/Artery_Aorta:GTEx/v8/Artery_Tibial:GTEx/v8/Colon_Sigmoid:GTEx/v7/Adipose_Subcutaneous	NA	Yes	IMR90:Mesenchymal_Stem_Cell:Mesendoderm:Trophoblast-like_Cell:hESC	2.157e-59	rs2119693;rs7012719;rs188385627;rs75218485;rs1441771;rs74304285;rs4464984;rs1441760;rs78358410;rs308;rs73208819;rs10106652;rs7012658;rs2119693:rs75218485:rs118099376:rs4464984;rs78358410:rs1441760;rs308:rs4464984:rs308:rs78358410:rs1441760;rs7012658:rs78358410;rs75218485:rs1441760;rs4464984:rs1441760:rs4464984;rs10106652:rs7012658:rs4464984;rs73208819:rs1441760	26
ENSG00000104613	INTS10	8	19674651	19709594	1	protein_coding	55174	INTS10	0.984217	NA	11	7.551	217	1.1356e-214	0	eQTLcatalogue/BLUEPRINT_ge_monocyte:eQTLcatalogue/BLUEPRINT_ge_neutrophil:eQTLcatalogue/BLUEPRINT_ge_T-cell:eQTLcatalogue/CEDAR_T-cell_CD4:eQTLcatalogue/Kasela_2017_T-cell_CD4:eQTLcatalogue/Kasela_2017_T-cell_CD8:eQTLcatalogue/Lepik_2017_ge_blood:eQTLcatalogue/Quach_2016_ge_monocyte_LPS:eQTLcatalogue/Quach_2016_ge_monocyte_naive:PsychENCODE_eQTLs:DICE/B_cell_naive:DICE/T_CD4_naive:DICE/T_CD8_naiv…	NA	Yes	GM12878:IMR90:Mesenchymal_Stem_Cell:Mesendoderm:Trophoblast-like_Cell:hESC	2.157e-59	rs2119693;rs75218485;rs1441771;rs74304285;rs7012719;rs4464984;rs78358410;rs1441760;rs188385627;rs249;rs7012658;rs308;rs10106652;rs73208819;rs75218485:rs2119693:rs118099376:rs4464984;rs78358410:rs1441760;rs308:rs4464984:rs308:rs78358410:rs1441760;rs7012658:rs78358410;rs75218485:rs1441760;rs4464984:rs1441760:rs4464984;rs10106652:rs7012658:rs4464984;rs73208819:rs1441760;rs7012658:rs73208819:rs101066…	26
ENSG00000175445	LPL	8	19759228	19824769	1	protein_coding	4023	LPL	3.33728e-06	1.04718	234	50	582	3.27170000000001e-310	0	TIGER/Nom_Alonso_Pancreatic_islets:EyeGEx:eQTLcatalogue/BLUEPRINT_ge_monocyte:eQTLcatalogue/CEDAR_monocyte_CD14:eQTLcatalogue/Fairfax_2014_naive:eQTLcatalogue/Lepik_2017_ge_blood:eQTLcatalogue/Quach_2016_ge_monocyte_IAV:eQTLcatalogue/Quach_2016_ge_monocyte_LPS:eQTLcatalogue/Quach_2016_ge_monocyte_naive:eQTLcatalogue/Quach_2016_ge_monocyte_Pam3CSK4:eQTLcatalogue/Quach_2016_ge_monocyte_R848:eQTLcat…	NA	Yes	Promoter_anchored_loops:Left_Ventricle:Spleen:IMR90:Mesenchymal_Stem_Cell:Mesendoderm:Neural_Progenitor_Cell:Trophoblast-like_Cell:hESC	2.157e-59	rs7012719;rs188385627;rs74304285;rs1441771;rs2119693;rs4464984;rs75218485;rs118099376;rs1441760;rs249;rs7012658;rs308;rs78358410;rs73208819;rs10106652;rs7012658:rs10106652:rs1441760;rs10106652:rs118099376:rs35246381:rs75218485:rs2119693:rs4464984;rs78358410:rs1441760;rs308:rs4464984:rs308:rs78358410:rs1441760;rs7012658:rs78358410;rs75218485:rs1441760;rs4464984:rs1441760:rs4464984;rs10106652:rs446…	1 day, 1:26:00
ENSG00000036565	SLC18A1	8	20002366	20040717	-1	protein_coding	6570	SLC18A1	1.88883e-14	0.247528	1	1.409	123	2.9104e-22	0	PsychENCODE_eQTLs:eQTLGen_cis_eQTLs:BIOSQTL/BIOS_eQTL_geneLevel:GTEx/v7/Brain_Substantia_nigra	NA	Yes	EP_correlation_cell_type_oneway:Left_Ventricle:Liver:IMR90:Mesenchymal_Stem_Cell:Mesendoderm:Trophoblast-like_Cell:hESC	2.157e-59	rs118099376;rs75218485;rs78358410;rs1441760;rs308;rs74304285;rs1441771;rs2119693;rs4464984;rs10106652;rs188385627;rs75218485:rs35246381:rs75218485:rs2119693:rs118099376:rs1441771;rs2119693:rs74304285;rs1441771:rs74304285;rs7012719;rs2119693:rs7012719:rs74304285;rs2119693:rs1441771:rs188385627:rs4464984:rs4464984;rs78358410:rs1441760;rs308:rs308:rs78358410:rs1441760;rs7012658:rs1441760;rs4464984:r…	1 day, 1:26:00
ENSG00000147416	ATP6V1B2	8	20054878	20084330	1	protein_coding	526	ATP6V1B2	0.991449	-0.74185	0	0	33	4.2452e-06	0.012165	eQTLGen_cis_eQTLs:CMC_SVA_cis	NA	Yes	Adult_Cortex:Fetal_Cortex:Left_Ventricle:Liver:IMR90:Mesenchymal_Stem_Cell:Mesendoderm:Trophoblast-like_Cell:hESC	2.157e-59	rs1441760;rs78358410;rs308;rs4464984;rs75218485;rs2119693:rs4464984:rs74304285:rs188385627:rs35246381:rs75218485:rs118099376:rs1441771;rs2119693:rs74304285;rs1441771:rs74304285;rs1441771;rs7012719;rs2119693:rs7012719:rs74304285;rs2119693:rs1441771:rs4464984;rs78358410:rs1441760;rs308:rs308:rs78358410:rs1441760;rs7012658:rs78358410;rs75218485:rs1441760;rs4464984:rs1441760:rs4464984;rs10106652:rs70…	1 day, 1:26:00
ENSG00000042980	ADAM28	8	24151553	24216531	1	protein_coding	10863	ADAM28	1.968e-17	1.94657	0	0	7	4.9583e-08	0.000668431	eQTLGen_trans_eQTLs	NA	No	NA	NA	rs3858704	45
ENSG00000147437	GNRH1	8	25276776	25282170	-1	protein_coding	2796	GNRH1	0.0986916	-0.756202	0	0	1	1.3847e-06	0.010901	eQTLGen_trans_eQTLs	NA	No	NA	0.01515	rs2285626;rs12979148	59
ENSG00000092964	DPYSL2	8	26371791	26515694	1	protein_coding	1808	DPYSL2	0.995558	0.747821	0	0	9	7.3665e-11	0	eQTLGen_trans_eQTLs	NA	No	NA	1.599e-13	rs2245019;rs3858704	1 day, 4:45:00
ENSG00000120915	EPHX2	8	27348296	27403081	1	protein_coding	2053	EPHX2	4.92249e-13	1.72964	0	0	8	2.8905e-13	0	eQTLGen_trans_eQTLs	NA	No	NA	0.003258	rs3858704	45
ENSG00000168081	PNOC	8	28174503	28200872	1	protein_coding	5368	PNOC	0.151495	-0.0220423	0	0	8	1.9513e-14	0	eQTLGen_trans_eQTLs	NA	No	NA	0.003258	rs3858704	45
ENSG00000104660	LEPROTL1	8	29952914	30034724	1	protein_coding	23484	LEPROTL1	0.62232	0.103764	0	0	2	8.2821e-07	0.00699871	eQTLGen_trans_eQTLs	NA	No	NA	NA	rs3858704	45
ENSG00000165046	LETM2	8	38243725	38267045	1	protein_coding	137994	LETM2	1.34236e-10	-0.443339	0	0	1	5.0572e-06	0.0332078	eQTLGen_trans_eQTLs	NA	No	NA	0.01503	rs12787646	37
ENSG00000168615	ADAM9	8	38854388	38962663	1	protein_coding	8754	ADAM9	0.828249	-1.00722	0	0	3	2.2876e-06	0.0172452	eQTLGen_trans_eQTLs	NA	No	NA	1.65e-11	rs2285626;rs12979148;rs7249692	59
ENSG00000131203	IDO1	8	39759794	39785963	1	protein_coding	3620	IDO1	1.4176e-05	-0.206785	0	0	8	2.6375e-12	0	eQTLGen_trans_eQTLs	NA	No	NA	0.003258	rs3858704	45
ENSG00000070501	POLB	8	42195972	42229326	1	protein_coding	5423	POLB	0.000157164	-0.415191	0	0	8	3.121e-14	0	eQTLGen_trans_eQTLs	NA	No	NA	0.003258	rs3858704	45
ENSG00000170791	CHCHD7	8	57124245	57131357	1	protein_coding	79145	CHCHD7	0.387976	-0.33344	0	0	5	1.1081e-06	0.00890097	eQTLGen_trans_eQTLs	NA	No	NA	NA	rs3858704	45
ENSG00000185697	MYBL1	8	67474410	67526482	-1	protein_coding	4603	MYBL1	0.998333	-1.19027	0	0	6	1.0388e-07	0.00118786	eQTLGen_trans_eQTLs	NA	No	NA	0.003258	rs3858704	45
ENSG00000175073	VCPIP1	8	67540722	67579452	-1	protein_coding	80124	VCPIP1	0.999341	-2.17055	0	0	6	8.6508e-08	0.00102902	eQTLGen_trans_eQTLs	NA	No	NA	0.003258	rs3858704	45
ENSG00000137573	SULF1	8	70378859	70573150	1	protein_coding	23213	SULF1	0.879275	-0.512696	0	0	4	0.000133144	3.41168e-10	CMC_SVA_cis:GTEx/v8/Artery_Tibial	NA	No	NA	1.491e-05	rs4738080	27
ENSG00000137571	SLCO5A1	8	70579282	70747299	-1	protein_coding	81796	SLCO5A1	1.52378e-05	-0.313352	0	0	1	1.08187e-05	0.0223875	GTEx/v8/Colon_Sigmoid	NA	Yes	GM12878	3.708e-08	rs4738080	27
ENSG00000147596	PRDM14	8	70963886	70983928	-1	protein_coding	63978	PRDM14	0.968776	0.548457	6	5.472	0	NA	NA	NA	NA	No	NA	6.486e-05	rs4738080	27
ENSG00000140396	NCOA2	8	71021997	71316040	-1	protein_coding	10499	NCOA2	0.999997	-0.631403	183	18.68	179	9.8707e-26	0	eQTLcatalogue/BLUEPRINT_ge_monocyte:eQTLcatalogue/Quach_2016_ge_monocyte_IAV:PsychENCODE_eQTLs:eQTLGen_cis_eQTLs:CMC_SVA_cis:GTEx/v8/Whole_Blood:GTEx/v8/Cells_Cultured_fibroblasts	NA	Yes	Promoter_anchored_loops:Adult_Cortex:Aorta:Left_Ventricle:Liver:Right_Ventricle:Spleen:GM12878:IMR90:Mesenchymal_Stem_Cell:Mesendoderm:Neural_Progenitor_Cell:Trophoblast-like_Cell:hESC	1.668e-08	rs4738080	27
ENSG00000067167	TRAM1	8	71485677	71520622	-1	protein_coding	23471	TRAM1	0.676697	-0.459691	0	0	113	1.219e-12	0	eQTLGen_cis_eQTLs:BIOSQTL/BIOS_eQTL_geneLevel:GTEx/v8/Artery_Tibial	NA	Yes	Aorta:Left_Ventricle:Liver:GM12878:IMR90:Mesenchymal_Stem_Cell:Mesendoderm:Trophoblast-like_Cell:hESC	1.668e-08	rs4738080	27
ENSG00000246366	RP11-382J12.1	8	71520812	71575514	1	protein_coding	NA	NA	NA	NA	0	0	4	2.87621e-06	1.21167e-42	eQTLGen_cis_eQTLs:GTEx/v8/Testis:GTEx/v7/Thyroid	NA	Yes	Aorta:Left_Ventricle:Liver:GM12878:IMR90:Mesenchymal_Stem_Cell:Mesendoderm:Trophoblast-like_Cell:hESC	1.668e-08	rs4738080	27
ENSG00000147592	LACTB2	8	71547553	71581409	-1	protein_coding	51110	LACTB2	0.000281761	-0.0229184	0	0	141	3.4272e-17	0	eQTLcatalogue/BLUEPRINT_ge_neutrophil:PsychENCODE_eQTLs:eQTLGen_cis_eQTLs:BIOSQTL/BIOS_eQTL_geneLevel:CMC_SVA_cis	NA	Yes	Fetal_Cortex:Left_Ventricle:Liver:GM12878:IMR90:Mesenchymal_Stem_Cell:Mesendoderm:Neural_Progenitor_Cell:Trophoblast-like_Cell:hESC	1.668e-08	rs4738080	27
ENSG00000221947	XKR9	8	71581600	71702606	1	protein_coding	389668	XKR9	3.60973e-08	-0.0231243	0	0	186	1.60076e-13	4.22459e-151	TIGER/Nom_Alonso_Pancreatic_islets:EyeGEx:eQTLcatalogue/HipSci_ge_iPSC:DICE/T_CD4_TH17:eQTLGen_cis_eQTLs:CMC_SVA_cis:BRAINEAC/FCTX:BRAINEAC/PUTM:BRAINEAC/TCTX:BRAINEAC/aveALL:GTEx/v8/Adipose_Subcutaneous:GTEx/v8/Adipose_Visceral_Omentum:GTEx/v8/Adrenal_Gland:GTEx/v8/Cells_EBV-transformed_lymphocytes:GTEx/v8/Artery_Aorta:GTEx/v8/Artery_Coronary:GTEx/v8/Artery_Tibial:GTEx/v8/Brain_Cortex:GTEx/v8/Co…	NA	Yes	Fetal_Cortex:Left_Ventricle:Liver:GM12878:IMR90:Mesenchymal_Stem_Cell:Mesendoderm:Neural_Progenitor_Cell:Trophoblast-like_Cell:hESC	1.668e-08	rs4738080	27
ENSG00000164683	HEY1	8	80676245	80680098	-1	protein_coding	23462	HEY1	0.916105	-0.319355	0	0	1	9.3142e-07	0.00774414	eQTLGen_trans_eQTLs	NA	No	NA	NA	rs3803300	48
ENSG00000133742	CA1	8	86239837	86291243	-1	protein_coding	759	CA1	3.77366e-05	-1.16016	0	0	5	4.7618e-11	0	eQTLGen_trans_eQTLs	NA	No	NA	2.31e-14	rs6065904;rs435306	62
ENSG00000104267	CA2	8	86376081	86393722	1	protein_coding	760	CA2	0.10037	NA	0	0	1	6.8919e-06	0.0428532	eQTLGen_trans_eQTLs	NA	No	NA	0.01301	rs3858704	45
ENSG00000123124	WWP1	8	87354967	87490649	1	protein_coding	11059	WWP1	0.956844	-0.110741	0	0	2	3.7028e-06	0.0258276	eQTLGen_trans_eQTLs	NA	No	NA	NA	rs3858704	45
ENSG00000104312	RIPK2	8	90769975	90803291	1	protein_coding	8767	RIPK2	0.554263	-0.266723	0	0	8	1.2772e-11	0	eQTLGen_trans_eQTLs	NA	No	NA	0.003258	rs3858704	45
ENSG00000104447	TRPS1	8	116420724	116821899	-1	protein_coding	7227	TRPS1	0.990109	-0.347408	243	21.4	193	5.0062e-35	0	TIGER/Nom_Alonso_Pancreatic_islets:PsychENCODE_eQTLs:DICE/B_cell_naive:eQTLGen_cis_eQTLs:BIOSQTL/BIOS_eQTL_geneLevel:CMC_SVA_cis:GTEx/v8/Artery_Aorta:GTEx/v8/Brain_Frontal_Cortex_BA9	NA	No	NA	1.362e-15	rs2245019;rs3808413;rs2009382	28
ENSG00000164754	RAD21	8	117858174	117887105	-1	protein_coding	5885	RAD21	0.999545	-0.354118	0	0	6	1.8915e-14	0	PsychENCODE_eQTLs:eQTLGen_cis_eQTLs	NA	Yes	GM12878:IMR90:Mesendoderm:hESC	1.362e-15	rs3802177;rs2009382:rs2245019;rs2009382:rs2245019:rs3808413	1 day, 4:29:00
ENSG00000164756	SLC30A8	8	117962512	118188953	1	protein_coding	169026	SLC30A8	1.79754e-09	0.258418	7	17.98	0	NA	NA	NA	NA	Yes	Left_Ventricle:IMR90:Mesenchymal_Stem_Cell:Mesendoderm:hESC	1.362e-15	rs3802177;rs2245019:rs2245019;rs2009382:rs2009382:rs3808413:rs3802177	1 day, 4:29:00
ENSG00000136999	NOV	8	120428546	120436593	1	protein_coding	4856	NOV	0.113897	1.95712	0	0	3	1.0073e-06	0.00822632	eQTLGen_trans_eQTLs	NA	Yes	Mesenchymal_Stem_Cell	2.131e-09	rs3858704;rs3802177	1 day, 5:45:00
ENSG00000156787	TBC1D31	8	124054208	124164393	1	protein_coding	93594	TBC1D31	1.34365e-09	-0.0999602	0	0	7	2.5131e-09	7.35024e-05	eQTLGen_trans_eQTLs	NA	No	NA	0.003258	rs3858704	45
ENSG00000170873	MTSS1	8	125563031	125740730	-1	protein_coding	9788	MTSS1	0.999824	-0.920893	0	0	8	2.3147e-15	0	eQTLGen_trans_eQTLs	NA	No	NA	0.003258	rs3858704	45
ENSG00000180938	ZNF572	8	125985540	125991631	1	protein_coding	137209	ZNF572	0.000651451	-0.137914	0	0	4	3.28078e-06	0.00408065	GTEx/v8/Skin_Sun_Exposed_Lower_leg	NA	Yes	Liver	2.604e-09	rs2385114	30
ENSG00000104549	SQLE	8	126010739	126034525	1	protein_coding	6713	SQLE	0.912971	1.17169	0	0	46	6.7366e-16	0	eQTLGen_trans_eQTLs	NA	Yes	IMR90:Mesenchymal_Stem_Cell:Trophoblast-like_Cell:hESC	4.48e-14	rs7043581;rs2740488;rs174547;rs651821;rs180326;rs11604424;rs3858704;rs2385114	30:33:39:44:45
ENSG00000173334	TRIB1	8	126442563	126450647	1	protein_coding	10221	TRIB1	0.606588	-0.456914	3	5.327	6	5.7895e-06	0.0289475	eQTLcatalogue/Alasoo_2018_ge_macrophage_Salmonella:CMC_SVA_cis	NA	Yes	EP_correlation_cell_type_oneway	2.604e-09	rs2385114	30
ENSG00000165071	TMEM71	8	133697253	133772958	-1	protein_coding	137835	TMEM71	4.16584e-10	0.169538	0	0	7	2.4166e-09	7.36784e-05	eQTLGen_trans_eQTLs	NA	No	NA	0.003258	rs3858704	45
ENSG00000160932	LY6E	8	144099399	144105249	1	protein_coding	4061	LY6E	0.73342	NA	0	0	4	1.715e-06	0.013281	eQTLGen_trans_eQTLs	NA	No	NA	0.003258	rs3858704	45
ENSG00000104518	GSDMD	8	144635377	144645232	1	protein_coding	79792	GSDMD	4.80695e-07	NA	0	0	6	1.2845e-10	0	eQTLGen_trans_eQTLs	NA	No	NA	NA	rs3858704	45
ENSG00000178719	GRINA	8	145064226	145067583	1	protein_coding	2907	GRINA	0.757342	NA	0	0	1	8.0594e-06	0.0487166	eQTLGen_trans_eQTLs	NA	No	NA	NA	rs3858704	45
ENSG00000213563	C8orf82	8	145751117	145754516	-1	protein_coding	414919	C8orf82	0.00666763	NA	0	0	1	2.5788e-06	0.0189385	eQTLGen_trans_eQTLs	NA	No	NA	NA	rs2285626;rs12979148;rs7249692	59
ENSG00000120217	CD274	9	5450503	5470566	1	protein_coding	29126	CD274	0.0046816	-0.173703	0	0	9	2.3839e-19	0	eQTLGen_trans_eQTLs	NA	No	NA	0.003258	rs3858704	45
ENSG00000197646	PDCD1LG2	9	5510545	5571282	1	protein_coding	80380	PDCD1LG2	0.000429826	0.0544808	0	0	8	5.1078e-13	0	eQTLGen_trans_eQTLs	NA	No	NA	0.003258	rs3858704	45
ENSG00000107165	TYRP1	9	12685439	12710290	1	protein_coding	7306	TYRP1	4.48056e-21	0.242775	0	0	55	1.19375e-06	0.00310396	GTEx/v8/Testis	NA	Yes	Mesenchymal_Stem_Cell:hESC	2.177e-09	rs2171661;rs11788917;rs2171661:rs2171661:rs11788917	31
ENSG00000153714	LURAP1L	9	12775020	12822130	1	protein_coding	286343	LURAP1L	0.0766243	0.220603	0	0	5	0.000172153	0.0134703	PsychENCODE_eQTLs	NA	No	NA	0.00123	rs2171661	31
ENSG00000198876	DCAF12	9	34086385	34127397	-1	protein_coding	25853	DCAF12	0.00348556	-0.645633	0	0	4	1.8551e-08	0.000246952	eQTLGen_trans_eQTLs	NA	No	NA	2.31e-14	rs435306;rs6065904	62
ENSG00000137070	IL11RA	9	34650699	34661889	1	protein_coding	3590	IL11RA	3.74046e-17	-0.45751	0	0	7	1.4099e-06	0.0110927	eQTLGen_trans_eQTLs	NA	No	NA	0.003258	rs3858704	45
ENSG00000137094	DNAJB5	9	34989638	34998897	1	protein_coding	25822	DNAJB5	0.491268	0.311728	0	0	8	3.3857e-10	2.16029e-05	eQTLGen_trans_eQTLs	NA	No	NA	0.003258	rs3858704	45
ENSG00000196092	PAX5	9	36833272	37034103	-1	protein_coding	5079	PAX5	0.984244	-0.198032	0	0	1	5.5302e-06	0.0357563	eQTLGen_trans_eQTLs	NA	No	NA	NA	rs3858704	45
ENSG00000106714	CNTNAP3	9	39072764	39288312	-1	protein_coding	101927068	CNTNAP3	0.0725664	-0.68048	0	0	6	1.4786e-07	0.00157276	eQTLGen_trans_eQTLs	NA	No	NA	NA	rs3858704	45
ENSG00000165060	FXN	9	71650175	71715094	1	protein_coding	2395	FXN	0.817754	1.89795	0	0	1	2.0686e-06	0.0159325	eQTLGen_trans_eQTLs	NA	No	NA	NA	rs4331050	43
ENSG00000135046	ANXA1	9	75766673	75785309	1	protein_coding	301	ANXA1	0.00044237	0.218837	0	0	8	1.2808e-19	0	eQTLGen_trans_eQTLs	NA	No	NA	0.003258	rs3858704	45
ENSG00000165030	NFIL3	9	94171327	94186144	-1	protein_coding	4783	NFIL3	0.9486	NA	0	0	1	7.3463e-06	0.045062	eQTLGen_trans_eQTLs	NA	No	NA	0.0002501	rs174547	39
ENSG00000157303	SUSD3	9	95820989	95847420	1	protein_coding	203328	SUSD3	0.00319514	NA	0	0	5	1.2572e-06	0.0100037	eQTLGen_trans_eQTLs	NA	No	NA	NA	rs3858704	45
ENSG00000158079	PTPDC1	9	96793076	96872138	1	protein_coding	138639	PTPDC1	0.00209572	-0.264988	0	0	1	1.89815e-06	0.00949075	eQTLcatalogue/Quach_2016_ge_monocyte_naive	NA	Yes	Fetal_Cortex	8.425e-07	rs148124442	32
ENSG00000175787	ZNF169	9	97021593	97063736	1	protein_coding	169841	ZNF169	1.74928e-09	-0.405415	52	22.8	162	4.2437e-40	0	eQTLcatalogue/BrainSeq_ge_brain:eQTLcatalogue/Fairfax_2014_naive:PsychENCODE_eQTLs:DICE/T_CD4_TH17:eQTLGen_cis_eQTLs:BIOSQTL/BIOS_eQTL_geneLevel:CMC_SVA_cis:CMC_NoSVA_cis:GTEx/v8/Whole_Blood:GTEx/v8/Brain_Cerebellar_Hemisphere:GTEx/v8/Brain_Cerebellum:GTEx/v8/Colon_Transverse:GTEx/v8/Muscle_Skeletal:GTEx/v8/Skin_Not_Sun_Exposed_Suprapubic:GTEx/v8/Skin_Sun_Exposed_Lower_leg:GTEx/v8/Thyroid:GTEx/v7…	NA	Yes	Fetal_Cortex	7.006e-09	rs148124442	32
ENSG00000130950	NUTM2F	9	97077605	97090926	-1	protein_coding	441457	NUTM2F	NA	-0.351116	24	15.17	1	2.24565e-05	2.57759e-09	GTEx/v8/Nerve_Tibial	NA	No	NA	2.586e-08	rs148124442	32
ENSG00000148110	HIATL1	9	97136833	97223324	1	protein_coding	84641	HIATL1	0.0239502	-0.606655	76	11.11	196	3.27170000000001e-310	0	TIGER/Nom_Alonso_Pancreatic_islets:EyeGEx:eQTLcatalogue/BLUEPRINT_ge_monocyte:eQTLcatalogue/BLUEPRINT_ge_neutrophil:eQTLcatalogue/CEDAR_monocyte_CD14:eQTLcatalogue/CEDAR_neutrophil_CD15:eQTLcatalogue/CEDAR_T-cell_CD4:eQTLcatalogue/Fairfax_2014_IFN24:eQTLcatalogue/Fairfax_2014_LPS24:eQTLcatalogue/Fairfax_2014_naive:eQTLcatalogue/GENCORD_ge_LCL:eQTLcatalogue/GENCORD_ge_T-cell:eQTLcatalogue/GEUVADIS…	NA	Yes	Promoter_anchored_loops	1.83e-09	rs148124442	32
ENSG00000130957	FBP2	9	97321002	97356075	-1	protein_coding	8789	FBP2	0.00139312	0.298357	0	0	2	1.66394e-08	1.16332e-15	GTEx/v8/Muscle_Skeletal:GTEx/v8/Pituitary:GTEx/v7/Muscle_Skeletal	NA	Yes	Promoter_anchored_loops	2.586e-08	rs148124442	32
ENSG00000165140	FBP1	9	97365415	97402531	-1	protein_coding	2203	FBP1	0.0985908	0.308276	0	0	39	6.9506e-14	0	eQTLGen_cis_eQTLs:GTEx/v8/Artery_Coronary:GTEx/v7/Pituitary	NA	No	NA	1.292e-08	rs148124442	32
ENSG00000148120	C9orf3	9	97488983	97849441	1	protein_coding	84909	C9orf3	5.19688e-12	-0.237468	0	0	4	0.000117963	0.0028797	GTEx/v8/Esophagus_Muscularis	NA	Yes	Promoter_anchored_loops	9.728e-07	rs148124442	32
ENSG00000119514	GALNT12	9	101569981	101612363	1	protein_coding	79695	GALNT12	0.00282566	0.213659	0	0	5	7.6668e-08	0.000975805	eQTLGen_trans_eQTLs	NA	No	NA	NA	rs3858704	45
ENSG00000136824	SMC2	9	106856541	106903698	1	protein_coding	10592	SMC2	0.998014	2.62023	0	0	28	0.000215991	2.97269e-55	PsychENCODE_eQTLs:CMC_SVA_cis:CMC_NoSVA_cis:GTEx/v8/Thyroid	NA	Yes	Left_Ventricle:Liver:GM12878:IMR90:Mesenchymal_Stem_Cell:Mesendoderm:Trophoblast-like_Cell:hESC	1.076e-55	rs12552509;rs2740488;rs2740492;rs7043581;rs2740487;rs2066716;rs2740480:rs2066716;rs12552509:rs12552509	33
ENSG00000186943	OR13C8	9	107331449	107332411	1	protein_coding	138802	OR13C8	0.0123181	0.334032	0	0	2	0.00079588	0.0337168	BRAINEAC/CRBL	NA	Yes	Aorta:Left_Ventricle:Liver:IMR90:Mesenchymal_Stem_Cell:Mesendoderm:Trophoblast-like_Cell:hESC	8.039e-09	rs2740492;rs2740480:rs2066716;rs12552509:rs12552509	33
ENSG00000257019	OR13C2	9	107366924	107367951	-1	protein_coding	392376	OR13C2	0.044348	0.730638	0	0	5	5.60498e-06	0.049	DICE/T_CD4_naive_TREG	NA	Yes	Left_Ventricle:Liver:IMR90:Mesenchymal_Stem_Cell:Mesendoderm:hESC	8.039e-09	rs12552509;rs2740480:rs2066716;rs12552509:rs12552509	33
ENSG00000179055	OR13D1	9	107456660	107457766	1	protein_coding	286365	OR13D1	0.0109559	0.506809	0	0	4	3.37946e-05	5.37575e-05	DICE/T_CD4_TH2:GTEx/v8/Testis	NA	Yes	Aorta:Left_Ventricle:Right_Ventricle:IMR90:Mesenchymal_Stem_Cell:Mesendoderm:hESC	3.104e-14	rs2740480;rs12552509;rs2740480:rs12552509	33
ENSG00000136783	NIPSNAP3A	9	107509969	107522403	1	protein_coding	25934	NIPSNAP3A	1.63591e-05	0.213981	17	9.606	119	2.5324e-273	0	TIGER/Nom_Alonso_Pancreatic_islets:EyeGEx:eQTLcatalogue/Alasoo_2018_ge_macrophage_IFNg_Salmonella:eQTLcatalogue/BLUEPRINT_ge_monocyte:eQTLcatalogue/BLUEPRINT_ge_neutrophil:eQTLcatalogue/BLUEPRINT_ge_T-cell:eQTLcatalogue/BrainSeq_ge_brain:eQTLcatalogue/CEDAR_monocyte_CD14:eQTLcatalogue/CEDAR_T-cell_CD4:eQTLcatalogue/CEDAR_T-cell_CD8:eQTLcatalogue/Fairfax_2014_IFN24:eQTLcatalogue/Fairfax_2014_LPS24…	NA	Yes	Mesenchymal_Stem_Cell:Mesendoderm:Trophoblast-like_Cell:hESC	1.076e-55	rs12552509;rs2066716;rs2740480;rs13291032;rs2740492;rs7043581;rs2740488;rs2740487;rs73664375;rs2740480:rs2066716;rs12552509:rs12552509	33
ENSG00000165028	NIPSNAP3B	9	107526438	107539738	1	protein_coding	55335	NIPSNAP3B	0.023883	-0.281409	19	8.699	38	4.663e-57	0	TIGER/Nom_Alonso_Pancreatic_islets:eQTLcatalogue/Alasoo_2018_ge_macrophage_IFNg:eQTLcatalogue/Lepik_2017_ge_blood:eQTLcatalogue/Quach_2016_ge_monocyte_IAV:eQTLcatalogue/Quach_2016_ge_monocyte_R848:eQTLGen_cis_eQTLs:BIOSQTL/BIOS_eQTL_geneLevel:GTEx/v8/Adipose_Subcutaneous:GTEx/v8/Muscle_Skeletal:GTEx/v8/Pancreas:GTEx/v8/Cells_Cultured_fibroblasts:GTEx/v8/Thyroid:GTEx/v7/Brain_Frontal_Cortex_BA9:GT…	NA	Yes	Left_Ventricle:Liver:Right_Ventricle:Spleen:GM12878:IMR90:Mesenchymal_Stem_Cell:Mesendoderm:Trophoblast-like_Cell:hESC	1.88e-29	rs12552509;rs2066716;rs2740480;rs73664375;rs2740480:rs2066716:rs150237889:rs4149307:rs150064281:rs13291032:rs2740492:rs2740488;rs2740492:rs13291032;rs7043581	33
ENSG00000165029	ABCA1	9	107543283	107690518	-1	protein_coding	19	ABCA1	0.0016588	0.0827742	255	23.1	160	1.9911e-14	0	eQTLcatalogue/CEDAR_B-cell_CD19:eQTLcatalogue/Fairfax_2014_IFN24:eQTLcatalogue/Fairfax_2014_LPS24:PsychENCODE_eQTLs:eQTLGen_cis_eQTLs:eQTLGen_trans_eQTLs:CMC_SVA_cis:GTEx/v8/Adrenal_Gland:GTEx/v8/Muscle_Skeletal:GTEx/v8/Cells_Cultured_fibroblasts:GTEx/v7/Artery_Aorta:GTEx/v7/Muscle_Skeletal:GTEx/v7/Cells_Transformed_fibroblasts:GTEx/v6/Cells_Transformed_fibroblasts	NA	Yes	EP_correlation_cell_type_oneway:Adult_Cortex:Fetal_Cortex:Left_Ventricle:Liver:IMR90:Mesenchymal_Stem_Cell:Mesendoderm:Trophoblast-like_Cell:hESC	4e-229	rs12552509;rs2066716;rs2740480;rs150064281;rs4149307;rs150237889;rs13291032;rs2740492;rs2740488;rs7043581;rs2740487;rs73664375;rs4665963;rs780095;rs1441760;rs78358410;rs308;rs4464984;rs10106652;rs174547;rs651821;rs180326;rs11604424;rs10892023;rs9989419;rs17231506;rs7203984;rs11076174;rs118146573;rs12708980;rs820299;rs2740492:rs2740488;rs2740487:rs2740492;rs73664375:rs2740488:rs73664375:rs2740487:…	9:26:33:39:44:51
ENSG00000070214	SLC44A1	9	108006903	108201452	1	protein_coding	23446	SLC44A1	0.999254	-0.569151	9	7.041	37	1.76327e-06	2.10254e-08	DICE/B_cell_naive:DICE/Monocyte_classical:eQTLGen_cis_eQTLs:CMC_SVA_cis:BRAINEAC/SNIG:GTEx/v8/Adipose_Visceral_Omentum:GTEx/v8/Artery_Aorta:GTEx/v8/Vagina	NA	Yes	Promoter_anchored_loops:Adult_Cortex:Fetal_Cortex:Left_Ventricle:Liver:GM12878:IMR90:Mesenchymal_Stem_Cell:Mesendoderm:Neural_Progenitor_Cell:Trophoblast-like_Cell:hESC	1.076e-55	rs2740480;rs2740488;rs2740492;rs2740487;rs13291032;rs7043581;rs2740480:rs4149307:rs13291032:rs2740492:rs2740488;rs2740487:rs2740488;rs2740492:rs2740492;rs73664375:rs2740488:rs73664375:rs2740487:rs2740488;rs2740487:rs2740492;rs2740487:rs7043581:rs13291032;rs7043581:rs2740488;rs7043581:rs150237889:rs150064281:rs12552509:rs2066716;rs12552509:rs2066716:rs4149307;rs2740480:rs2740488	33
ENSG00000106701	FSD1L	9	108210077	108314714	1	protein_coding	83856	FSD1L	NA	NA	0	0	5	2.65422e-05	0.02666	BRAINEAC/OCTX	NA	Yes	Adult_Cortex:Fetal_Cortex:Aorta:Left_Ventricle:Liver:GM12878:IMR90:Mesenchymal_Stem_Cell:Mesendoderm:Neural_Progenitor_Cell:Trophoblast-like_Cell:hESC	1.076e-55	rs13291032;rs7043581;rs4149307:rs2740480:rs13291032:rs2740492:rs2740488;rs2740492:rs150064281:rs13291032;rs7043581:rs2740488;rs2740492;rs2740487:rs2740492;rs73664375:rs2740488:rs73664375:rs2740487:rs2740488;rs2740487:rs7043581:rs2740488;rs7043581:rs2066716:rs150237889:rs12552509:rs2066716;rs12552509:rs4149307;rs2740480:rs2740488;rs2740487	33
ENSG00000106692	FKTN	9	108320411	108403399	1	protein_coding	2218	FKTN	0.000192375	-1.00348	0	0	1	0.000114845	3.83223e-08	GTEx/v8/Cells_Cultured_fibroblasts	NA	Yes	Mesenchymal_Stem_Cell:Mesendoderm:hESC	1.88e-29	rs2740480;rs2740480:rs2066716:rs150237889:rs4149307:rs150064281:rs13291032:rs2740492:rs2740488;rs2740492:rs13291032;rs7043581:rs2066716;rs12552509:rs12552509:rs4149307	33
ENSG00000095209	TMEM38B	9	108456825	108538893	1	protein_coding	55151	TMEM38B	0.1688	0.890196	1	0.399	2	6.69765e-14	8.96818e-38	eQTLcatalogue/BLUEPRINT_ge_neutrophil:GTEx/v8/Adrenal_Gland:GTEx/v8/Artery_Tibial:GTEx/v8/Brain_Spinal_cord_cervical_c-1:GTEx/v8/Cells_Cultured_fibroblasts:GTEx/v8/Skin_Not_Sun_Exposed_Suprapubic:GTEx/v8/Skin_Sun_Exposed_Lower_leg:GTEx/v8/Thyroid:GTEx/v7/Artery_Tibial:GTEx/v7/Cells_Transformed_fibroblasts:GTEx/v7/Skin_Not_Sun_Exposed_Suprapubic:GTEx/v7/Testis:GTEx/v6/Artery_Tibial	NA	Yes	Liver:GM12878:IMR90:Mesenchymal_Stem_Cell:Mesendoderm:Trophoblast-like_Cell:hESC	1.88e-29	rs2740480;rs2740480:rs2066716:rs150237889:rs4149307:rs150064281:rs13291032:rs2740492:rs2740488;rs2740492:rs13291032;rs7043581:rs2066716;rs12552509:rs12552509:rs4149307	33
ENSG00000136826	KLF4	9	110247133	110252763	-1	protein_coding	9314	KLF4	0.98105	NA	0	0	5	1.5184e-06	0.011853	eQTLGen_trans_eQTLs	NA	No	NA	0.003258	rs3858704	45
ENSG00000136867	SLC31A2	9	115913222	115926417	1	protein_coding	1318	SLC31A2	2.78117e-05	1.02962	0	0	8	1.3335e-19	0	eQTLGen_trans_eQTLs	NA	No	NA	0.003258	rs3858704	45
ENSG00000095397	DFNB31	9	117164360	117267730	-1	protein_coding	25861	DFNB31	0.0110885	NA	0	0	5	3.8465e-07	0.00341072	eQTLGen_trans_eQTLs	NA	No	NA	0.003258	rs3858704	45
ENSG00000106952	TNFSF8	9	117656003	117692697	-1	protein_coding	944	TNFSF8	0.852777	1.464	0	0	1	2.3193e-06	0.0173935	eQTLGen_trans_eQTLs	NA	No	NA	NA	rs3858704	45
ENSG00000119403	PHF19	9	123617977	123639606	-1	protein_coding	26147	PHF19	0.995642	-1.10905	0	0	3	1.208e-08	0.000176197	eQTLGen_trans_eQTLs	NA	No	NA	0.04112	rs55823486;rs58434384	59
ENSG00000148180	GSN	9	123970072	124095121	1	protein_coding	2934	GSN	3.18618e-06	NA	0	0	6	6.1008e-07	0.0053271	eQTLGen_trans_eQTLs	NA	No	NA	0.003258	rs3858704	45
ENSG00000136908	DPM2	9	130697378	130700763	-1	protein_coding	8818	DPM2	0.019801	-0.913597	0	0	11	1.1388e-06	0.00904599	eQTLGen_trans_eQTLs	NA	No	NA	2.357e-19	rs5754422;rs464161;rs131654	63
ENSG00000119333	WDR34	9	131395940	131419066	-1	protein_coding	89891	WDR34	3.6986e-05	-0.0444387	0	0	6	3.2243e-08	0.000421757	eQTLGen_trans_eQTLs	NA	No	NA	NA	rs3858704	45
ENSG00000095321	CRAT	9	131857089	131873468	-1	protein_coding	1384	CRAT	3.45791e-07	NA	0	0	2	1.2738e-06	0.0101372	eQTLGen_trans_eQTLs	NA	No	NA	3.129e-09	rs2285626;rs12979148;rs7249692	59
ENSG00000119383	PPP2R4	9	131873229	131911225	1	protein_coding	5524	PPP2R4	0.983923	0.692856	0	0	1	3.8189e-06	0.0265325	eQTLGen_trans_eQTLs	NA	No	NA	1.65e-11	rs7249692	59
ENSG00000160271	RALGDS	9	135973107	136039301	-1	protein_coding	5900	RALGDS	0.296706	-0.211408	0	0	4	7.1003e-07	0.00611083	eQTLGen_trans_eQTLs	NA	No	NA	NA	rs3858704	45
ENSG00000148288	GBGT1	9	136028340	136039332	-1	protein_coding	26301	GBGT1	0.000100077	0.668451	0	0	5	3.5214e-06	0.0247654	eQTLGen_trans_eQTLs	NA	No	NA	7.963e-20	rs5754422;rs464161;rs131654	63
ENSG00000188229	TUBB4B	9	140135665	140138159	1	protein_coding	10383	TUBB4B	0.929541	NA	0	0	7	4.2087e-06	0.0286739	eQTLGen_trans_eQTLs	NA	No	NA	1.471e-17	rs56094641;rs8057044	50
ENSG00000067082	KLF6	10	3818188	3827473	-1	protein_coding	1316	KLF6	0.925053	0.156896	0	0	8	7.5476e-21	0	eQTLGen_trans_eQTLs	NA	No	NA	0.003258	rs3858704	45
ENSG00000196139	AKR1C3	10	5077546	5149878	1	protein_coding	8644	AKR1C3	1.07139e-11	0.642111	0	0	7	2.5097e-08	0.000329489	eQTLGen_trans_eQTLs	NA	No	NA	NA	rs3858704	45
ENSG00000134470	IL15RA	10	5990855	6020150	-1	protein_coding	3601	IL15RA	3.17111e-08	0.112618	0	0	8	1.6074e-09	5.63169e-05	eQTLGen_trans_eQTLs	NA	No	NA	0.003258	rs3858704	45
ENSG00000065665	SEC61A2	10	12171636	12211960	1	protein_coding	55176	SEC61A2	0.950042	NA	0	0	1	3.8559e-06	0.0267096	eQTLGen_trans_eQTLs	NA	No	NA	0.01187	rs2385114	30
ENSG00000148468	FAM171A1	10	15253642	15413061	-1	protein_coding	221061	FAM171A1	0.987016	-1.16921	0	0	8	1.8713e-09	5.63804e-05	eQTLGen_trans_eQTLs	NA	No	NA	0.003258	rs3858704	45
ENSG00000026025	VIM	10	17270258	17279592	1	protein_coding	7431	VIM	0.959386	0.389167	0	0	8	1.2822e-13	0	eQTLGen_trans_eQTLs	NA	No	NA	0.003258	rs3858704	45
ENSG00000136770	DNAJC1	10	22045466	22292698	-1	protein_coding	64215	DNAJC1	1.42209e-08	NA	0	0	1	5.6522e-06	0.0364824	eQTLGen_trans_eQTLs	NA	No	NA	0.0002142	rs174547	39
ENSG00000148450	MSRB2	10	23384435	23410942	1	protein_coding	22921	MSRB2	0.00424761	-0.322431	0	0	6	5.5162e-09	0.000119801	eQTLGen_trans_eQTLs	NA	No	NA	NA	rs3858704	45
ENSG00000198915	RASGEF1A	10	43689983	43762367	-1	protein_coding	221002	RASGEF1A	0.910096	-0.06894	0	0	2	1.453e-06	0.0113095	eQTLGen_trans_eQTLs	NA	No	NA	NA	rs3858704	45
ENSG00000072422	RHOBTB1	10	62629196	62761198	-1	protein_coding	9886	RHOBTB1	0.00183823	-0.452042	0	0	4	1.1386e-11	0	eQTLGen_trans_eQTLs	NA	No	NA	1.65e-11	rs2285626;rs12979148;rs7249692	59
ENSG00000171988	JMJD1C	10	64926981	65225722	-1	protein_coding	221037	JMJD1C	1	-0.552974	0	0	8	7.076e-16	0	eQTLGen_trans_eQTLs	NA	No	NA	0.003258	rs3858704	45
ENSG00000156510	HKDC1	10	70980059	71027315	1	protein_coding	80201	HKDC1	1.84795e-12	0.104024	0	0	7	4.1676e-08	0.000580572	eQTLGen_trans_eQTLs	NA	No	NA	NA	rs3858704	45
ENSG00000171224	C10orf35	10	71390007	71393352	1	protein_coding	219738	C10orf35	0.0683716	-0.0636213	0	0	8	1.3056e-13	0	eQTLGen_trans_eQTLs	NA	No	NA	0.003258	rs3858704	45
ENSG00000148730	EIF4EBP2	10	72164135	72188374	1	protein_coding	1979	EIF4EBP2	0.694677	-0.154473	0	0	1	2.5436e-06	0.0186785	eQTLGen_trans_eQTLs	NA	No	NA	6.959e-06	rs261291;rs723967	49
ENSG00000168209	DDIT4	10	74033678	74035794	1	protein_coding	54541	DDIT4	0.0194955	-0.377546	0	0	6	5.1864e-08	0.000734988	eQTLGen_trans_eQTLs	NA	No	NA	NA	rs3858704	45
ENSG00000156113	KCNMA1	10	78629359	79398353	-1	protein_coding	3778	KCNMA1	0.999217	NA	0	0	1	7.4994e-06	0.0458726	eQTLGen_trans_eQTLs	NA	No	NA	NA	rs3858704	45
ENSG00000108175	ZMIZ1	10	80828792	81076276	1	protein_coding	57178	ZMIZ1	0.999744	-0.00362349	0	0	6	2.1322e-09	5.58451e-05	eQTLGen_trans_eQTLs	NA	No	NA	NA	rs3858704	45
ENSG00000133661	SFTPD	10	81697496	81742370	-1	protein_coding	6441	SFTPD	0.240356	-0.213349	0	0	4	8.3673e-07	0.00708044	eQTLGen_trans_eQTLs	NA	No	NA	NA	rs3858704	45
ENSG00000148688	RPP30	10	92631473	92668312	1	protein_coding	10556	RPP30	2.35352e-05	0.775723	0	0	1	5.0717e-06	0.0332399	eQTLGen_trans_eQTLs	NA	No	NA	7.563e-78	rs7203984;rs11076174;rs118146573	51
ENSG00000138190	EXOC6	10	94590935	94819250	1	protein_coding	54536	EXOC6	0.0281606	0.0138229	0	0	6	6.8914e-07	0.00596115	eQTLGen_trans_eQTLs	NA	No	NA	0.003258	rs3858704	45
ENSG00000138115	CYP2C8	10	96796530	96829254	-1	protein_coding	1558	CYP2C8	5.3504e-12	0.0732111	0	0	67	NA	0.009	CMC_SVA_trans:CMC_NoSVA_cis:CMC_NoSVA_trans	NA	No	NA	5.437e-08	rs148124442	32
ENSG00000107438	PDLIM1	10	96997329	97050781	-1	protein_coding	9124	PDLIM1	1.38008e-05	NA	0	0	5	8.4803e-08	0.00103134	eQTLGen_trans_eQTLs	NA	No	NA	NA	rs3858704	45
ENSG00000095585	BLNK	10	97951458	98031344	-1	protein_coding	29760	BLNK	0.990011	0.0634242	0	0	7	4.0161e-10	2.02881e-05	eQTLGen_trans_eQTLs	NA	No	NA	0.003258	rs3858704	45
ENSG00000165879	FRAT1	10	99079022	99081672	1	protein_coding	10023	FRAT1	0.271481	-0.694137	0	0	8	2.1043e-08	0.000243457	eQTLGen_trans_eQTLs	NA	No	NA	0.003258	rs3858704	45
ENSG00000052749	RRP12	10	99116115	99161127	-1	protein_coding	23223	RRP12	4.36448e-06	-0.568469	0	0	8	1.7795e-13	0	eQTLGen_trans_eQTLs	NA	No	NA	0.003258	rs3858704	45
ENSG00000099194	SCD	10	102106881	102124591	1	protein_coding	6319	SCD	0.887398	0.060418	0	0	35	1.3524e-25	0	eQTLGen_trans_eQTLs	NA	No	NA	2.255e-09	rs174547	39
ENSG00000171206	TRIM8	10	104404253	104418164	1	protein_coding	81603	TRIM8	0.992012	-0.52129	0	0	8	3.5234e-10	2.15285e-05	eQTLGen_trans_eQTLs	NA	No	NA	0.003258	rs3858704	45
ENSG00000138172	CALHM2	10	105206543	105212660	-1	protein_coding	51063	CALHM2	5.29268e-07	-0.689941	0	0	5	8.0645e-07	0.00683224	eQTLGen_trans_eQTLs	NA	No	NA	NA	rs3858704	45
ENSG00000107954	NEURL1	10	105253736	105352309	1	protein_coding	9148	NEURL1	0.53757	0.420609	0	0	2	2.6169e-06	0.0192851	eQTLGen_trans_eQTLs	NA	No	NA	NA	rs180326;rs61905078;rs17440824	44
ENSG00000107960	OBFC1	10	105642300	105677963	-1	protein_coding	79991	OBFC1	1.3253e-05	NA	0	0	8	7.7208e-25	0	eQTLGen_trans_eQTLs	NA	No	NA	0.003258	rs3858704	45
ENSG00000065613	SLK	10	105726959	105788991	1	protein_coding	9748	SLK	0.428398	-0.261974	0	0	1	5.8928e-06	0.0378688	eQTLGen_trans_eQTLs	NA	No	NA	NA	rs3858704	45
ENSG00000065618	COL17A1	10	105791044	105845760	-1	protein_coding	1308	COL17A1	5.82447e-11	-0.457013	0	0	5	2.86213e-05	0.0409803	GTEx/v8/Esophagus_Gastroesophageal_Junction	NA	No	NA	4.446e-07	rs61867194	34
ENSG00000065621	GSTO2	10	106028631	106064703	1	protein_coding	119391	GSTO2	1.66971e-07	0.0298912	0	0	22	0.000205856	0.0157004	PsychENCODE_eQTLs	NA	Yes	Mesenchymal_Stem_Cell:Mesendoderm:hESC	5e-09	rs61867194	34
ENSG00000148841	ITPRIP	10	106071894	106098162	-1	protein_coding	85450	ITPRIP	1.35269e-05	0.357391	0	0	32	3.0963e-06	0.00607409	BRAINEAC/TCTX:GTEx/v8/Artery_Aorta	NA	No	NA	2.773e-07	rs61867194	34
ENSG00000156395	SORCS3	10	106400859	107024993	1	protein_coding	22986	SORCS3	0.325134	0.170375	236	20.1	183	3.0249e-44	0	PsychENCODE_eQTLs:eQTLGen_cis_eQTLs:BIOSQTL/BIOS_eQTL_geneLevel:GTEx/v8/Adipose_Subcutaneous:GTEx/v8/Adrenal_Gland:GTEx/v8/Pituitary:GTEx/v7/Adrenal_Gland:GTEx/v6/Adrenal_Gland	NA	Yes	Promoter_anchored_loops:Adult_Cortex:Mesendoderm:Trophoblast-like_Cell:hESC	5e-09	rs61867194	34
ENSG00000119927	GPAM	10	113909624	113975135	-1	protein_coding	57678	GPAM	0.000580579	-0.953652	71	24.1	138	2.12107e-18	0	eQTLcatalogue/BLUEPRINT_ge_T-cell:eQTLcatalogue/CEDAR_ileum:eQTLcatalogue/GENCORD_ge_fibroblast:PsychENCODE_eQTLs:eQTLGen_cis_eQTLs:BIOSQTL/BIOS_eQTL_geneLevel:CMC_SVA_cis:GTEx/v8/Adipose_Subcutaneous:GTEx/v8/Artery_Aorta:GTEx/v8/Artery_Tibial:GTEx/v8/Brain_Cerebellar_Hemisphere:GTEx/v8/Brain_Cerebellum:GTEx/v8/Breast_Mammary_Tissue:GTEx/v8/Esophagus_Gastroesophageal_Junction:GTEx/v8/Esophagus_Mu…	NA	Yes	Left_Ventricle:Liver:Pancreas:Spleen:IMR90:Mesenchymal_Stem_Cell:Mesendoderm:Neural_Progenitor_Cell:Trophoblast-like_Cell:hESC	2.555e-09	rs10787429;rs200749392;rs60191209;rs200749392:rs60191209:rs200749392:rs10787429	35
ENSG00000119913	TECTB	10	114043493	114064793	1	protein_coding	6975	TECTB	5.94967e-09	0.707836	14	9.169	35	8.85069e-18	1.14365e-20	PsychENCODE_eQTLs:GTEx/v8/Brain_Amygdala:GTEx/v8/Brain_Anterior_cingulate_cortex_BA24:GTEx/v8/Brain_Caudate_basal_ganglia:GTEx/v8/Brain_Cortex:GTEx/v8/Brain_Hippocampus:GTEx/v8/Brain_Nucleus_accumbens_basal_ganglia:GTEx/v8/Brain_Putamen_basal_ganglia:GTEx/v8/Testis:GTEx/v7/Brain_Anterior_cingulate_cortex_BA24:GTEx/v7/Brain_Caudate_basal_ganglia:GTEx/v7/Brain_Cortex:GTEx/v7/Brain_Nucleus_accumbens…	NA	Yes	Adult_Cortex:Fetal_Cortex:Adrenal:Aorta:Hippocampus:Left_Ventricle:Liver:Pancreas:Right_Ventricle:Spleen:GM12878:IMR90:Mesenchymal_Stem_Cell:Mesendoderm:Neural_Progenitor_Cell:Trophoblast-like_Cell:hESC	2.588e-10	rs200749392;rs60191209;rs10787429:rs200749392:rs60191209;rs200749392:rs117421856:rs60191209	35
ENSG00000197142	ACSL5	10	114133776	114188138	1	protein_coding	51703	ACSL5	0.0167637	-0.200081	1	1.54	112	7.3595e-108	0	eQTLcatalogue/Lepik_2017_ge_blood:eQTLcatalogue/Quach_2016_ge_monocyte_LPS:eQTLGen_cis_eQTLs:BIOSQTL/BIOS_eQTL_geneLevel:GTEx/v8/Whole_Blood:GTEx/v7/Whole_Blood	NA	Yes	Liver:IMR90:Mesenchymal_Stem_Cell:Mesendoderm:Trophoblast-like_Cell:hESC	2.555e-09	rs117421856;rs60191209;rs10787429;rs200749392;rs10787429:rs200749392:rs60191209;rs200749392:rs60191209	35
ENSG00000023041	ZDHHC6	10	114190058	114206672	-1	protein_coding	64429	ZDHHC6	0.00067586	0.16713	1	3.581	42	6.0946e-11	0	eQTLGen_cis_eQTLs:GTEx/v8/Adipose_Visceral_Omentum:GTEx/v7/Adipose_Visceral_Omentum	NA	Yes	Left_Ventricle:Liver:Mesenchymal_Stem_Cell:Mesendoderm:Trophoblast-like_Cell:hESC	2.555e-09	rs117421856;rs200749392;rs60191209;rs10787429:rs200749392:rs60191209;rs200749392:rs60191209	35
ENSG00000151532	VTI1A	10	114206756	114578503	1	protein_coding	143187	VTI1A	0.413424	-1.59457	1	3.581	25	NA	0.049	CMC_SVA_cis	NA	Yes	Left_Ventricle:Liver:Mesenchymal_Stem_Cell:Mesendoderm:Trophoblast-like_Cell:hESC	2.555e-09	rs117421856;rs10787429;rs10787429:rs200749392:rs60191209;rs200749392:rs60191209	35
ENSG00000166033	HTRA1	10	124221041	124274424	1	protein_coding	5654	HTRA1	0.0169475	NA	0	0	2	4.3734e-06	0.0294831	eQTLGen_trans_eQTLs	NA	No	NA	1.599e-13	rs2245019;rs174547	1 day, 4:39:00
ENSG00000189319	FAM53B	10	126307861	126432838	-1	protein_coding	9679	FAM53B	0.40048	-1.16077	0	0	7	6.8566e-09	0.000134363	eQTLGen_trans_eQTLs	NA	No	NA	0.003258	rs3858704	45
ENSG00000151651	ADAM8	10	135075907	135090372	-1	protein_coding	101	ADAM8	1.47656e-07	0.121956	0	0	2	6.4289e-09	0.00013493	eQTLGen_trans_eQTLs	NA	No	NA	1.599e-13	rs2245019	28
ENSG00000182208	MOB2	11	1490687	1522477	-1	protein_coding	81532	MOB2	0.641499	0.199982	0	0	2	1.7031e-06	0.0131966	eQTLGen_trans_eQTLs	NA	No	NA	0.01164	rs3858704	45
ENSG00000132109	TRIM21	11	4406127	4414926	-1	protein_coding	6737	TRIM21	0.0930518	1.03426	0	0	8	1.263e-13	0	eQTLGen_trans_eQTLs	NA	No	NA	0.003258	rs3858704	45
ENSG00000223609	HBD	11	5253908	5256600	-1	protein_coding	3045	HBD	0.000155108	0.569791	0	0	13	7.9964e-10	2.01979e-05	eQTLGen_trans_eQTLs	NA	No	NA	7.963e-20	rs5754422;rs464161;rs131654	63
ENSG00000166483	WEE1	11	9595228	9615004	1	protein_coding	7465	WEE1	0.997106	NA	0	0	6	4.5772e-08	0.000631579	eQTLGen_trans_eQTLs	NA	No	NA	NA	rs3858704	45
ENSG00000133789	SWAP70	11	9685624	9774538	1	protein_coding	23075	SWAP70	0.348844	-0.389633	0	0	5	1.4359e-07	0.00154056	eQTLGen_trans_eQTLs	NA	No	NA	NA	rs3858704	45
ENSG00000110315	RNF141	11	10533225	10562777	-1	protein_coding	50862	RNF141	0.000702153	-0.118241	0	0	4	7.1825e-09	0.000133914	eQTLGen_trans_eQTLs	NA	No	NA	NA	rs3858704	45
ENSG00000072952	MRVI1	11	10594638	10715535	-1	protein_coding	10335	MRVI1	0.00184122	-0.67004	0	0	5	5.0082e-07	0.00441035	eQTLGen_trans_eQTLs	NA	No	NA	NA	rs3858704	45
ENSG00000109881	CCDC34	11	27352374	27385415	-1	protein_coding	91057	CCDC34	4.91355e-07	-0.41837	0	0	1	1.0951e-10	0	eQTLGen_cis_eQTLs	NA	Yes	IMR90:Mesenchymal_Stem_Cell:Mesendoderm:Trophoblast-like_Cell:hESC	0.01362	rs11030099	36
ENSG00000205213	LGR4	11	27387508	27494322	-1	protein_coding	55366	LGR4	0.994113	0.243578	1	1.922	59	2.0155e-39	0	eQTLcatalogue/BLUEPRINT_ge_monocyte:eQTLGen_cis_eQTLs:BIOSQTL/BIOS_eQTL_geneLevel:GTEx/v7/Brain_Cerebellum	NA	Yes	hESC	3.757e-08	rs11030099	36
ENSG00000148943	LIN7C	11	27516123	27528320	-1	protein_coding	55327	LIN7C	0.0300652	-0.643347	0	0	71	7.5911e-31	0	EyeGEx:eQTLcatalogue/Lepik_2017_ge_blood:eQTLcatalogue/TwinsUK_ge_fat:eQTLcatalogue/TwinsUK_ge_LCL:PsychENCODE_eQTLs:eQTLGen_cis_eQTLs:BIOSQTL/BIOS_eQTL_geneLevel:GTEx/v8/Adipose_Subcutaneous:GTEx/v8/Adipose_Visceral_Omentum:GTEx/v8/Artery_Aorta:GTEx/v8/Artery_Tibial:GTEx/v8/Breast_Mammary_Tissue:GTEx/v8/Colon_Sigmoid:GTEx/v8/Esophagus_Gastroesophageal_Junction:GTEx/v8/Esophagus_Mucosa:GTEx/v8/Es…	NA	Yes	EP_correlation_organ_oneway:Spleen:IMR90:Mesenchymal_Stem_Cell:Mesendoderm:hESC	3.757e-08	rs11030099	36
ENSG00000176697	BDNF	11	27676440	27743605	-1	protein_coding	627	BDNF	0.946719	0.108206	46	21.4	49	2.23599e-07	0.000607249	eQTLcatalogue/HipSci_ge_iPSC:GTEx/v8/Heart_Left_Ventricle:GTEx/v7/Heart_Left_Ventricle:GTEx/v6/Brain_Nucleus_accumbens_basal_ganglia:GTEx/v6/Nerve_Tibial:GTEx/v6/Thyroid	NA	Yes	Adult_Cortex:Fetal_Cortex:Left_Ventricle:Mesendoderm:hESC	3.757e-08	rs11030099	36
ENSG00000169519	METTL15	11	28129795	28355054	1	protein_coding	196074	METTL15	0.000155431	-1.29305	0	0	7	0.000110393	2.59562e-06	GTEx/v8/Spleen	NA	Yes	Left_Ventricle:IMR90:Mesenchymal_Stem_Cell:Mesendoderm:Neural_Progenitor_Cell:hESC	3.757e-08	rs11030099	36
ENSG00000110422	HIPK3	11	33278218	33378569	1	protein_coding	10114	HIPK3	0.893187	-1.55551	0	0	7	2.7183e-07	0.00263794	eQTLGen_trans_eQTLs	NA	No	NA	0.003258	rs3858704	45
ENSG00000110455	ACCS	11	44087475	44105772	1	protein_coding	84680	ACCS	0.000171666	-0.629897	0	0	4	2.3701e-06	0.0176585	eQTLGen_trans_eQTLs	NA	No	NA	0.003258	rs3858704	45
ENSG00000157570	TSPAN18	11	44748015	44953972	1	protein_coding	90139	TSPAN18	0.16186	2.12296	0	0	4	2.539e-07	0.00248116	eQTLGen_trans_eQTLs	NA	No	NA	NA	rs3858704	45
ENSG00000110492	MDK	11	46402306	46405375	1	protein_coding	4192	MDK	0.0224328	-0.438483	0	0	1	2.49066e-05	0.000461256	GTEx/v8/Esophagus_Mucosa	NA	No	NA	7.652e-07	rs12787646	37
ENSG00000180423	HARBI1	11	46624411	46639459	-1	protein_coding	283254	HARBI1	0.00570134	-0.629323	0	0	17	9.3523e-07	0.00294154	eQTLGen_cis_eQTLs	NA	Yes	Promoter_anchored_loops	9.323e-08	rs12787646	37
ENSG00000175220	ARHGAP1	11	46698630	46722165	-1	protein_coding	392	ARHGAP1	0.185565	-0.389142	0	0	37	1.28319e-09	1.06279e-25	EyeGEx:eQTLGen_cis_eQTLs:GTEx/v8/Adipose_Subcutaneous:GTEx/v8/Adipose_Visceral_Omentum:GTEx/v8/Artery_Aorta:GTEx/v8/Artery_Tibial:GTEx/v8/Breast_Mammary_Tissue:GTEx/v8/Esophagus_Muscularis:GTEx/v8/Muscle_Skeletal:GTEx/v8/Nerve_Tibial:GTEx/v8/Pancreas:GTEx/v8/Prostate:GTEx/v8/Cells_Cultured_fibroblasts:GTEx/v8/Skin_Sun_Exposed_Lower_leg:GTEx/v8/Spleen:GTEx/v8/Stomach:GTEx/v7/Adipose_Visceral_Oment…	NA	Yes	Mesenchymal_Stem_Cell	3.003e-08	rs12787646	37
ENSG00000175213	ZNF408	11	46722368	46727462	1	protein_coding	79797	ZNF408	7.89161e-06	-0.0780348	0	0	25	3.99954e-06	1.26003e-11	GTEx/v8/Artery_Aorta:GTEx/v8/Artery_Tibial:GTEx/v8/Nerve_Tibial:GTEx/v7/Artery_Tibial:GTEx/v7/Stomach	NA	Yes	Mesenchymal_Stem_Cell	3.003e-08	rs12787646	37
ENSG00000180210	F2	11	46740730	46761056	1	protein_coding	2147	F2	0.959943	-0.037985	0	0	1	0.000349295	6.69233e-11	GTEx/v8/Artery_Tibial	NA	Yes	Mesenchymal_Stem_Cell	3.003e-08	rs12787646	37
ENSG00000175216	CKAP5	11	46764598	46867847	-1	protein_coding	9793	CKAP5	1	-0.360017	0	0	12	1.48798e-05	0.00834489	GTEx/v8/Thyroid:GTEx/v7/Whole_Blood	NA	Yes	IMR90:Mesenchymal_Stem_Cell:Mesendoderm:Trophoblast-like_Cell:hESC	2.085e-08	rs12787646	37
ENSG00000134569	LRP4	11	46878419	46940193	-1	protein_coding	4038	LRP4	0.100209	0.314362	0	0	216	1.73066e-59	7.95622e-54	GTEx/v8/Nerve_Tibial:GTEx/v8/Pancreas:GTEx/v8/Pituitary:GTEx/v8/Spleen:GTEx/v8/Thyroid:GTEx/v7/Nerve_Tibial:GTEx/v7/Pancreas:GTEx/v6/Nerve_Tibial:GTEx/v6/Pancreas	NA	Yes	Promoter_anchored_loops:Left_Ventricle:Liver:Spleen:GM12878:IMR90:Mesenchymal_Stem_Cell:Mesendoderm:Neural_Progenitor_Cell:Trophoblast-like_Cell:hESC	1.275e-08	rs12787646	37
ENSG00000149179	C11orf49	11	46958240	47185936	1	protein_coding	79096	C11orf49	5.45468e-07	0.564558	1	3.257	224	9.09938e-61	1.12368e-54	CMC_SVA_cis:CMC_NoSVA_cis:GTEx/v8/Esophagus_Mucosa:GTEx/v8/Lung:GTEx/v8/Nerve_Tibial:GTEx/v8/Pancreas:GTEx/v8/Testis:GTEx/v7/Nerve_Tibial:GTEx/v7/Pancreas:GTEx/v7/Testis:GTEx/v6/Testis	NA	Yes	Left_Ventricle:Liver:Spleen:GM12878:IMR90:Mesenchymal_Stem_Cell:Mesendoderm:Neural_Progenitor_Cell:Trophoblast-like_Cell:hESC	1.275e-08	rs12787646	37
ENSG00000149182	ARFGAP2	11	47185848	47198676	-1	protein_coding	84364	ARFGAP2	0.562991	-0.150782	1	3.257	29	9.4806e-29	0	eQTLGen_cis_eQTLs:BIOSQTL/BIOS_eQTL_geneLevel:GTEx/v8/Esophagus_Mucosa:GTEx/v8/Cells_Cultured_fibroblasts:GTEx/v8/Skin_Not_Sun_Exposed_Suprapubic:GTEx/v7/Esophagus_Mucosa	NA	Yes	Promoter_anchored_loops	2.995e-06	rs12787646	37
ENSG00000165912	PACSIN3	11	47199076	47207994	-1	protein_coding	29763	PACSIN3	0.016793	-0.514939	1	16.77	68	1.1616e-10	7.2019e-28	eQTLcatalogue/TwinsUK_ge_skin:PsychENCODE_eQTLs:GTEx/v8/Adipose_Subcutaneous:GTEx/v8/Artery_Aorta:GTEx/v8/Esophagus_Mucosa:GTEx/v8/Esophagus_Muscularis:GTEx/v8/Skin_Not_Sun_Exposed_Suprapubic:GTEx/v8/Skin_Sun_Exposed_Lower_leg:GTEx/v8/Thyroid:GTEx/v7/Esophagus_Mucosa:GTEx/v7/Skin_Not_Sun_Exposed_Suprapubic:GTEx/v7/Skin_Sun_Exposed_Lower_leg:GTEx/v7/Thyroid:GTEx/v6/Esophagus_Mucosa	NA	Yes	Promoter_anchored_loops	2.085e-08	rs12787646	37
ENSG00000134574	DDB2	11	47236493	47260767	1	protein_coding	1643	DDB2	0.00511791	0.677015	2	5.714	250	9.8766e-43	0	eQTLcatalogue/BLUEPRINT_ge_monocyte:eQTLcatalogue/BrainSeq_ge_brain:eQTLcatalogue/TwinsUK_ge_skin:DICE/B_cell_naive:DICE/Monocyte_classical:eQTLGen_cis_eQTLs:BIOSQTL/BIOS_eQTL_geneLevel:GTEx/v8/Esophagus_Mucosa:GTEx/v8/Skin_Not_Sun_Exposed_Suprapubic:GTEx/v8/Skin_Sun_Exposed_Lower_leg:GTEx/v7/Esophagus_Mucosa:GTEx/v7/Skin_Not_Sun_Exposed_Suprapubic:GTEx/v7/Skin_Sun_Exposed_Lower_leg	NA	Yes	Promoter_anchored_loops	1.275e-08	rs12787646	37
ENSG00000134575	ACP2	11	47260853	47270457	-1	protein_coding	53	ACP2	0.000525977	-0.370782	1	5.714	255	3.27170000000001e-310	0	TIGER/Nom_Alonso_Pancreatic_islets:EyeGEx:eQTLcatalogue/BLUEPRINT_ge_monocyte:eQTLcatalogue/CEDAR_T-cell_CD4:eQTLcatalogue/Fairfax_2014_naive:eQTLcatalogue/Lepik_2017_ge_blood:eQTLcatalogue/Quach_2016_ge_monocyte_R848:eQTLcatalogue/TwinsUK_ge_skin:DICE/T_CD8_naive_activated:DICE/Monocyte_classical:DICE/NK:DICE/T_CD4_naive_TREG:eQTLGen_cis_eQTLs:BIOSQTL/BIOS_eQTL_geneLevel:GTEx/v8/Adipose_Subcutan…	NA	Yes	Promoter_anchored_loops:Adult_Cortex:Fetal_Cortex:GM12878:IMR90:Mesenchymal_Stem_Cell:Mesendoderm:hESC	1.275e-08	rs12787646	37
ENSG00000025434	NR1H3	11	47269851	47290396	1	protein_coding	10062	NR1H3	0.856186	0.657584	1	5.714	283	3.0574e-233	0	eQTLcatalogue/BLUEPRINT_ge_T-cell:eQTLcatalogue/Fairfax_2012_B-cell_CD19:eQTLcatalogue/Fairfax_2014_naive:eQTLcatalogue/GENCORD_ge_LCL:eQTLcatalogue/GEUVADIS_ge_LCL:eQTLcatalogue/Lepik_2017_ge_blood:eQTLcatalogue/TwinsUK_ge_LCL:PsychENCODE_eQTLs:DICE/B_cell_naive:DICE/T_CD4_TH17:eQTLGen_cis_eQTLs:eQTLGen_trans_eQTLs:BIOSQTL/BIOS_eQTL_geneLevel:GTEx/v8/Whole_Blood:GTEx/v8/Brain_Cerebellar_Hemisphe…	NA	Yes	Promoter_anchored_loops:Adult_Cortex:Fetal_Cortex:GM12878:IMR90:Mesenchymal_Stem_Cell:Mesendoderm:hESC	1.275e-08	rs12787646;rs3858704	1 day, 13:45:00
ENSG00000110514	MADD	11	47290712	47351582	1	protein_coding	8567	MADD	0.000901823	-0.37505	1	1.883	284	2.1375e-98	0	TIGER/Nom_Alonso_Pancreatic_islets:EyeGEx:eQTLcatalogue/BLUEPRINT_ge_monocyte:eQTLcatalogue/BLUEPRINT_ge_neutrophil:eQTLcatalogue/Fairfax_2014_naive:eQTLcatalogue/GEUVADIS_ge_LCL:eQTLcatalogue/Lepik_2017_ge_blood:PsychENCODE_eQTLs:eQTLGen_cis_eQTLs:BIOSQTL/BIOS_eQTL_geneLevel:CMC_SVA_cis:GTEx/v8/Adipose_Subcutaneous:GTEx/v8/Whole_Blood:GTEx/v8/Artery_Tibial:GTEx/v8/Brain_Cerebellar_Hemisphere:GTE…	NA	Yes	Promoter_anchored_loops:Adult_Cortex:Fetal_Cortex:Left_Ventricle:GM12878:IMR90:Mesenchymal_Stem_Cell:Mesendoderm:Trophoblast-like_Cell:hESC	1.275e-08	rs12787646	37
ENSG00000134571	MYBPC3	11	47352957	47374253	-1	protein_coding	4607	MYBPC3	1.35054e-06	-0.432352	33	14.21	299	3.27170000000001e-310	0	eQTLcatalogue/Alasoo_2018_ge_macrophage_IFNg:eQTLcatalogue/Alasoo_2018_ge_macrophage_naive:eQTLcatalogue/BLUEPRINT_ge_monocyte:eQTLcatalogue/BLUEPRINT_ge_neutrophil:eQTLcatalogue/CEDAR_neutrophil_CD15:eQTLcatalogue/Fairfax_2014_LPS2:eQTLcatalogue/Fairfax_2014_naive:eQTLcatalogue/Lepik_2017_ge_blood:eQTLcatalogue/Naranbhai_2015_neutrophil_CD16:eQTLcatalogue/Nedelec_2016_ge_macrophage_Listeria:eQTL…	NA	Yes	Promoter_anchored_loops:EP_correlation_cell_type_oneway:IMR90:Mesenchymal_Stem_Cell	1.275e-08	rs12787646	37
ENSG00000066336	SPI1	11	47376411	47400127	-1	protein_coding	6688	SPI1	0.897231	NA	58	14.21	299	8.1761e-94	0	eQTLcatalogue/CEDAR_B-cell_CD19:eQTLcatalogue/CEDAR_monocyte_CD14:eQTLcatalogue/CEDAR_neutrophil_CD15:eQTLcatalogue/Fairfax_2012_B-cell_CD19:eQTLcatalogue/Fairfax_2014_IFN24:eQTLcatalogue/Fairfax_2014_LPS24:eQTLcatalogue/Fairfax_2014_LPS2:eQTLcatalogue/Fairfax_2014_naive:eQTLcatalogue/Naranbhai_2015_neutrophil_CD16:eQTLGen_cis_eQTLs	NA	Yes	Promoter_anchored_loops:EP_correlation_cell_type_oneway:EP_correlation_organ_oneway:Adult_Cortex:IMR90:Mesenchymal_Stem_Cell	1.275e-08	rs12787646	37
ENSG00000165915	SLC39A13	11	47428683	47438047	1	protein_coding	91252	SLC39A13	0.011852	-0.332419	39	21.7	251	1.12225e-19	0	eQTLcatalogue/Alasoo_2018_ge_macrophage_Salmonella:eQTLcatalogue/BLUEPRINT_ge_monocyte:eQTLcatalogue/BLUEPRINT_ge_T-cell:eQTLcatalogue/Nedelec_2016_ge_macrophage_naive:eQTLcatalogue/Nedelec_2016_ge_macrophage_Salmonella:eQTLcatalogue/Quach_2016_ge_monocyte_IAV:eQTLcatalogue/Quach_2016_ge_monocyte_LPS:eQTLcatalogue/Quach_2016_ge_monocyte_naive:eQTLcatalogue/Quach_2016_ge_monocyte_Pam3CSK4:eQTLcata…	NA	Yes	Promoter_anchored_loops:EP_correlation_cell_type_oneway:Adult_Cortex:Fetal_Cortex:IMR90:Mesenchymal_Stem_Cell	1.275e-08	rs12787646	37
ENSG00000165916	PSMC3	11	47440320	47447993	-1	protein_coding	5702	PSMC3	0.9792	-0.404697	41	14.02	279	9.24e-46	0	TIGER/Nom_Alonso_Pancreatic_islets:EyeGEx:eQTLcatalogue/BLUEPRINT_ge_monocyte:eQTLcatalogue/Quach_2016_ge_monocyte_LPS:eQTLcatalogue/Quach_2016_ge_monocyte_naive:eQTLcatalogue/Quach_2016_ge_monocyte_Pam3CSK4:PsychENCODE_eQTLs:eQTLGen_cis_eQTLs:BIOSQTL/BIOS_eQTL_geneLevel:CMC_SVA_cis:GTEx/v8/Adipose_Subcutaneous:GTEx/v8/Adipose_Visceral_Omentum:GTEx/v8/Adrenal_Gland:GTEx/v8/Whole_Blood:GTEx/v8/Art…	NA	Yes	Promoter_anchored_loops:IMR90:Mesenchymal_Stem_Cell	1.275e-08	rs12787646	37
ENSG00000165917	RAPSN	11	47459308	47470730	-1	protein_coding	5913	RAPSN	0.0326445	0.0487816	39	22	252	7.88658e-22	0	eQTLcatalogue/BLUEPRINT_ge_neutrophil:eQTLcatalogue/Quach_2016_ge_monocyte_LPS:eQTLcatalogue/Quach_2016_ge_monocyte_R848:DICE/T_CD4_naive:eQTLGen_cis_eQTLs:BIOSQTL/BIOS_eQTL_geneLevel:GTEx/v8/Adipose_Subcutaneous:GTEx/v8/Adipose_Visceral_Omentum:GTEx/v8/Brain_Caudate_basal_ganglia:GTEx/v8/Brain_Cortex:GTEx/v8/Brain_Putamen_basal_ganglia:GTEx/v8/Colon_Transverse:GTEx/v8/Lung:GTEx/v8/Nerve_Tibial:G…	NA	Yes	Adult_Cortex:IMR90:Mesenchymal_Stem_Cell	1.275e-08	rs12787646	37
ENSG00000149187	CELF1	11	47487496	47587121	-1	protein_coding	10658	CELF1	0.998617	-0.376216	18	17.63	77	1.95831e-14	9.79155e-11	eQTLcatalogue/Quach_2016_ge_monocyte_LPS:eQTLcatalogue/Quach_2016_ge_monocyte_Pam3CSK4:eQTLcatalogue/Quach_2016_ge_monocyte_R848:eQTLGen_cis_eQTLs:BIOSQTL/BIOS_eQTL_geneLevel:GTEx/v8/Whole_Blood:GTEx/v8/Artery_Tibial:GTEx/v8/Esophagus_Gastroesophageal_Junction:GTEx/v8/Lung:GTEx/v8/Nerve_Tibial:GTEx/v8/Cells_Cultured_fibroblasts:GTEx/v7/Nerve_Tibial	NA	Yes	Promoter_anchored_loops:Liver:GM12878:IMR90:Mesenchymal_Stem_Cell:Mesendoderm	1.63e-08	rs12787646	37
ENSG00000213619	NDUFS3	11	47586888	47606114	1	protein_coding	4722	NDUFS3	0.047137	-0.0123446	8	14.52	268	4.13453e-13	2.74832e-09	eQTLcatalogue/GEUVADIS_ge_LCL:eQTLcatalogue/Quach_2016_ge_monocyte_LPS:eQTLcatalogue/Quach_2016_ge_monocyte_Pam3CSK4:PsychENCODE_eQTLs:BIOSQTL/BIOS_eQTL_geneLevel:GTEx/v8/Adipose_Subcutaneous:GTEx/v8/Brain_Cerebellar_Hemisphere:GTEx/v8/Brain_Cerebellum:GTEx/v8/Esophagus_Mucosa:GTEx/v8/Cells_Cultured_fibroblasts:GTEx/v8/Thyroid:GTEx/v7/Brain_Cerebellar_Hemisphere:GTEx/v7/Brain_Cerebellum:GTEx/v7/E…	NA	Yes	Promoter_anchored_loops:Liver:GM12878:IMR90:Mesenchymal_Stem_Cell:Mesendoderm	1.275e-08	rs12787646	37
ENSG00000110536	PTPMT1	11	47586982	47595013	1	protein_coding	114971	PTPMT1	0.459152	NA	5	11.24	227	2.2247e-27	0	eQTLcatalogue/Fairfax_2014_LPS2:eQTLcatalogue/Fairfax_2014_naive:eQTLcatalogue/Quach_2016_ge_monocyte_LPS:eQTLcatalogue/Quach_2016_ge_monocyte_R848:PsychENCODE_eQTLs:DICE/B_cell_naive:eQTLGen_cis_eQTLs:BIOSQTL/BIOS_eQTL_geneLevel:GTEx/v8/Adipose_Subcutaneous:GTEx/v8/Artery_Tibial:GTEx/v8/Muscle_Skeletal:GTEx/v8/Skin_Sun_Exposed_Lower_leg:GTEx/v7/Artery_Tibial	NA	Yes	Promoter_anchored_loops:Liver:GM12878:IMR90:Mesenchymal_Stem_Cell:Mesendoderm	1.275e-08	rs12787646	37
ENSG00000123444	KBTBD4	11	47593749	47600567	-1	protein_coding	55709	KBTBD4	0.0180744	-0.492621	5	9.104	38	0.000292661	0.0211605	PsychENCODE_eQTLs	NA	Yes	EP_links_oneway:Promoter_anchored_loops:Adult_Cortex:Fetal_Cortex:GM12878:IMR90:Mesenchymal_Stem_Cell:Mesendoderm:Trophoblast-like_Cell:hESC	1.275e-08	rs12787646	37
ENSG00000231880	KBTBD4	11	47599277	47599823	1	protein_coding	NA	NA	NA	-0.492621	4	9.104	0	NA	NA	NA	NA	Yes	EP_links_oneway:Adult_Cortex:Fetal_Cortex:Liver:GM12878:IMR90:Mesenchymal_Stem_Cell:Mesendoderm	1.275e-08	rs12787646	37
ENSG00000196666	FAM180B	11	47608198	47610746	1	protein_coding	399888	FAM180B	0.315838	NA	5	14.52	282	1.27218e-20	6.3609e-17	eQTLcatalogue/BrainSeq_ge_brain:PsychENCODE_eQTLs:GTEx/v8/Brain_Caudate_basal_ganglia:GTEx/v8/Brain_Cerebellar_Hemisphere:GTEx/v8/Brain_Cerebellum:GTEx/v8/Brain_Cortex:GTEx/v8/Brain_Frontal_Cortex_BA9:GTEx/v8/Brain_Nucleus_accumbens_basal_ganglia:GTEx/v8/Brain_Putamen_basal_ganglia:GTEx/v8/Skin_Not_Sun_Exposed_Suprapubic:GTEx/v8/Skin_Sun_Exposed_Lower_leg:GTEx/v8/Thyroid:GTEx/v7/Brain_Caudate_bas…	NA	Yes	Promoter_anchored_loops:Adult_Cortex:Fetal_Cortex:GM12878:IMR90:Mesenchymal_Stem_Cell:Mesendoderm:Trophoblast-like_Cell:hESC	1.275e-08	rs12787646	37
ENSG00000172247	C1QTNF4	11	47611216	47616211	-1	protein_coding	114900	C1QTNF4	0.679081	NA	9	14.52	298	3.27170000000001e-310	0	eQTLcatalogue/Fairfax_2014_naive:eQTLcatalogue/GENCORD_ge_LCL:eQTLcatalogue/GENCORD_ge_T-cell:eQTLcatalogue/Kasela_2017_T-cell_CD4:eQTLcatalogue/Nedelec_2016_ge_macrophage_Listeria:eQTLcatalogue/Nedelec_2016_ge_macrophage_naive:eQTLcatalogue/Nedelec_2016_ge_macrophage_Salmonella:eQTLcatalogue/TwinsUK_ge_blood:eQTLcatalogue/TwinsUK_ge_fat:eQTLcatalogue/TwinsUK_ge_LCL:eQTLcatalogue/TwinsUK_ge_skin:…	NA	Yes	Adult_Cortex:Fetal_Cortex:GM12878:IMR90:Mesenchymal_Stem_Cell:Mesendoderm:Trophoblast-like_Cell:hESC	1.275e-08	rs12787646	37
ENSG00000109919	MTCH2	11	47638867	47664175	-1	protein_coding	23788	MTCH2	0.166788	0.0369336	20	25	298	0	0	TIGER/Nom_Alonso_Pancreatic_islets:EyeGEx:eQTLcatalogue/Alasoo_2018_ge_macrophage_IFNg_Salmonella:eQTLcatalogue/BLUEPRINT_ge_T-cell:eQTLcatalogue/BrainSeq_ge_brain:eQTLcatalogue/Fairfax_2014_IFN24:eQTLcatalogue/Nedelec_2016_ge_macrophage_naive:PsychENCODE_eQTLs:eQTLGen_cis_eQTLs:BIOSQTL/BIOS_eQTL_geneLevel:xQTLServer_eQTLs:BRAINEAC/CRBL:GTEx/v8/Adipose_Subcutaneous:GTEx/v8/Brain_Amygdala:GTEx/v8/…	NA	Yes	Adult_Cortex:Fetal_Cortex:IMR90:Mesenchymal_Stem_Cell	1.275e-08	rs12787646	37
ENSG00000165923	AGBL2	11	47681143	47736941	-1	protein_coding	79841	AGBL2	6.81051e-12	-0.765874	28	9.449	67	2.2607e-13	0	EyeGEx:eQTLcatalogue/Quach_2016_ge_monocyte_IAV:eQTLGen_cis_eQTLs:BIOSQTL/BIOS_eQTL_geneLevel:GTEx/v8/Nerve_Tibial:GTEx/v8/Small_Intestine_Terminal_Ileum:GTEx/v8/Thyroid:GTEx/v8/Vagina:GTEx/v7/Artery_Aorta	NA	Yes	Adult_Cortex:Left_Ventricle:Liver:GM12878:IMR90:Mesenchymal_Stem_Cell:Mesendoderm:Trophoblast-like_Cell:hESC	1.275e-08	rs12787646	37
ENSG00000109920	FNBP4	11	47738072	47788995	-1	protein_coding	23360	FNBP4	0.999993	-0.713792	33	9.218	257	8.5455e-60	0	EyeGEx:eQTLcatalogue/BLUEPRINT_ge_neutrophil:eQTLcatalogue/BLUEPRINT_ge_T-cell:eQTLcatalogue/Nedelec_2016_ge_macrophage_Salmonella:scRNA_eQTLs/T_CD4:scRNA_eQTLs/PBMC:eQTLGen_cis_eQTLs:BIOSQTL/BIOS_eQTL_geneLevel:GTEx/v8/Whole_Blood:GTEx/v8/Esophagus_Mucosa:GTEx/v8/Muscle_Skeletal:GTEx/v8/Nerve_Tibial:GTEx/v8/Cells_Cultured_fibroblasts:GTEx/v7/Esophagus_Mucosa:GTEx/v7/Muscle_Skeletal:GTEx/v7/Cells…	NA	Yes	Promoter_anchored_loops:Liver:GM12878:IMR90:Mesenchymal_Stem_Cell:Mesendoderm:Trophoblast-like_Cell:hESC	1.275e-08	rs12787646	37
ENSG00000030066	NUP160	11	47799639	47870107	-1	protein_coding	23279	NUP160	0.0239792	-0.345694	37	11.78	259	3.6234e-54	0	EyeGEx:eQTLcatalogue/Alasoo_2018_ge_macrophage_IFNg:eQTLcatalogue/Alasoo_2018_ge_macrophage_naive:eQTLcatalogue/BLUEPRINT_ge_monocyte:eQTLcatalogue/Fairfax_2014_naive:eQTLcatalogue/GEUVADIS_ge_LCL:eQTLcatalogue/HipSci_ge_iPSC:eQTLcatalogue/Nedelec_2016_ge_macrophage_naive:eQTLcatalogue/Quach_2016_ge_monocyte_naive:DICE/B_cell_naive:DICE/Monocyte_classical:DICE/Monocyte_non_classical:eQTLGen_cis_e…	NA	Yes	Promoter_anchored_loops:Adult_Cortex:Fetal_Cortex:Spleen:GM12878:IMR90:Mesenchymal_Stem_Cell:Mesendoderm:Trophoblast-like_Cell:hESC	1.275e-08	rs12787646	37
ENSG00000149177	PTPRJ	11	48002113	48189670	1	protein_coding	5795	PTPRJ	2.38654e-05	NA	5	8.15	247	4.9313e-37	0	eQTLcatalogue/BLUEPRINT_ge_monocyte:eQTLcatalogue/BLUEPRINT_ge_neutrophil:eQTLcatalogue/BLUEPRINT_ge_T-cell:eQTLcatalogue/GEUVADIS_ge_LCL:eQTLcatalogue/Lepik_2017_ge_blood:eQTLcatalogue/Quach_2016_ge_monocyte_IAV:DICE/Monocyte_classical:DICE/Monocyte_non_classical:eQTLGen_cis_eQTLs:BIOSQTL/BIOS_eQTL_geneLevel:CMC_SVA_cis:GTEx/v8/Adipose_Subcutaneous:GTEx/v8/Adipose_Visceral_Omentum:GTEx/v8/Whole_…	NA	Yes	Adult_Cortex:Liver:Spleen:GM12878:IMR90:Mesenchymal_Stem_Cell:Mesendoderm:Trophoblast-like_Cell:hESC	1.275e-08	rs12787646	37
ENSG00000181273	OR5AK2	11	56756347	56757342	1	protein_coding	390181	OR5AK2	2.87905e-07	-0.138667	0	0	15	1.95498e-05	0.00424564	BRAINEAC/TCTX	NA	No	NA	1.196e-08	rs641325	38
ENSG00000134817	APLNR	11	57001051	57004709	-1	protein_coding	187	APLNR	0.43246	0.741685	0	0	21	3.36741e-05	9.05989e-05	TIGER/Nom_Alonso_Pancreatic_islets:GTEx/v8/Skin_Not_Sun_Exposed_Suprapubic	NA	No	NA	0.0003432	rs641325	38
ENSG00000109991	P2RX3	11	57105848	57138073	1	protein_coding	5024	P2RX3	0.0114976	-0.175016	0	0	1	3.39457e-05	3.989e-06	GTEx/v7/Heart_Left_Ventricle	NA	Yes	IMR90	8.425e-06	rs641325	38
ENSG00000186652	PRG2	11	57154267	57158130	-1	protein_coding	5553	PRG2	1.36695e-05	-0.16199	0	0	11	7.13589e-06	2.26752e-14	GTEx/v8/Artery_Tibial:GTEx/v8/Skin_Sun_Exposed_Lower_leg:GTEx/v7/Adipose_Visceral_Omentum:GTEx/v7/Esophagus_Gastroesophageal_Junction:GTEx/v7/Nerve_Tibial	NA	Yes	IMR90:Mesendoderm:hESC	8.425e-06	rs641325	38
ENSG00000134802	SLC43A3	11	57174427	57195053	-1	protein_coding	29015	SLC43A3	0.000317449	0.0246953	0	0	14	0.00010868	3.21598e-14	GTEx/v8/Skin_Sun_Exposed_Lower_leg	NA	Yes	IMR90:Mesenchymal_Stem_Cell:Mesendoderm:Trophoblast-like_Cell:hESC	2.926e-06	rs641325	38
ENSG00000149150	SLC43A1	11	57252007	57283259	-1	protein_coding	8501	SLC43A1	7.85327e-05	-0.136928	0	0	13	2.44388e-06	4.09691e-14	GTEx/v8/Artery_Tibial:GTEx/v8/Pancreas:GTEx/v7/Adrenal_Gland:GTEx/v7/Artery_Tibial	NA	Yes	Liver:IMR90:Mesenchymal_Stem_Cell:Trophoblast-like_Cell:hESC	2.926e-06	rs641325	38
ENSG00000134809	TIMM10	11	57295936	57298276	-1	protein_coding	26519	TIMM10	0.00949476	0.000100078	0	0	67	1.3036e-122	0	TIGER/Nom_Alonso_Pancreatic_islets:eQTLcatalogue/BLUEPRINT_ge_T-cell:eQTLcatalogue/CEDAR_B-cell_CD19:eQTLcatalogue/CEDAR_monocyte_CD14:eQTLcatalogue/CEDAR_rectum:eQTLcatalogue/CEDAR_T-cell_CD4:eQTLcatalogue/CEDAR_T-cell_CD8:eQTLcatalogue/CEDAR_transverse_colon:eQTLcatalogue/Fairfax_2012_B-cell_CD19:eQTLcatalogue/Fairfax_2014_IFN24:eQTLcatalogue/Fairfax_2014_LPS24:eQTLcatalogue/Fairfax_2014_LPS2:e…	NA	Yes	Adult_Cortex:Fetal_Cortex:Liver:IMR90:Mesenchymal_Stem_Cell:Trophoblast-like_Cell:hESC	1.196e-08	rs641325;rs3858704	1 day, 14:45:00
ENSG00000214872	SMTNL1	11	57308979	57318108	1	protein_coding	219537	SMTNL1	6.40315e-06	NA	0	0	36	1.2781e-16	0	eQTLcatalogue/GEUVADIS_ge_LCL:eQTLcatalogue/TwinsUK_ge_LCL:eQTLGen_cis_eQTLs:GTEx/v8/Adipose_Subcutaneous:GTEx/v8/Adipose_Visceral_Omentum:GTEx/v8/Adrenal_Gland:GTEx/v8/Artery_Aorta:GTEx/v8/Brain_Caudate_basal_ganglia:GTEx/v8/Brain_Cerebellar_Hemisphere:GTEx/v8/Brain_Cerebellum:GTEx/v8/Brain_Hippocampus:GTEx/v8/Colon_Transverse:GTEx/v8/Esophagus_Gastroesophageal_Junction:GTEx/v8/Esophagus_Mucosa:…	NA	Yes	Liver:IMR90:Mesenchymal_Stem_Cell:Trophoblast-like_Cell:hESC	8.425e-06	rs641325	38
ENSG00000156587	UBE2L6	11	57319129	57335757	-1	protein_coding	9246	UBE2L6	0.0140103	NA	0	0	12	8.8408e-32	0	eQTLcatalogue/Kasela_2017_T-cell_CD8:eQTLGen_trans_eQTLs:GTEx/v8/Esophagus_Muscularis	NA	Yes	GM12878:IMR90:Mesenchymal_Stem_Cell	8.425e-06	rs641325;rs3858704	1 day, 14:45:00
ENSG00000149131	SERPING1	11	57364860	57382326	1	protein_coding	710	SERPING1	0.972837	-0.519499	0	0	66	5.2987e-209	0	eQTLcatalogue/CEDAR_platelet:eQTLGen_cis_eQTLs:eQTLGen_trans_eQTLs:BIOSQTL/BIOS_eQTL_geneLevel:GTEx/v8/Whole_Blood:GTEx/v7/Thyroid	NA	Yes	Adult_Cortex:Fetal_Cortex:Liver:IMR90:Mesenchymal_Stem_Cell:hESC	1.196e-08	rs641325;rs3858704	1 day, 14:45:00
ENSG00000166793	YPEL4	11	57412560	57417417	-1	protein_coding	219539	YPEL4	0.805555	-2.01157	1	1.117	65	1.07944e-69	0	eQTLcatalogue/Alasoo_2018_ge_macrophage_IFNg_Salmonella:eQTLcatalogue/Alasoo_2018_ge_macrophage_IFNg:eQTLcatalogue/Alasoo_2018_ge_macrophage_naive:eQTLcatalogue/Alasoo_2018_ge_macrophage_Salmonella:eQTLcatalogue/BLUEPRINT_ge_monocyte:eQTLcatalogue/Fairfax_2014_IFN24:eQTLcatalogue/Fairfax_2014_LPS24:eQTLcatalogue/Fairfax_2014_LPS2:eQTLcatalogue/Fairfax_2014_naive:eQTLcatalogue/GENCORD_ge_LCL:eQTLc…	NA	Yes	Aorta:Left_Ventricle:Lung:Pancreas:Spleen:GM12878:IMR90:Mesenchymal_Stem_Cell:Mesendoderm:Neural_Progenitor_Cell:Trophoblast-like_Cell:hESC	1.196e-08	rs641325	38
ENSG00000172409	CLP1	11	57416465	57429340	1	protein_coding	10978	CLP1	0.937605	-0.832602	2	4.107	59	3.2229e-36	0	eQTLcatalogue/BLUEPRINT_ge_monocyte:eQTLcatalogue/CEDAR_monocyte_CD14:eQTLcatalogue/Fairfax_2014_IFN24:eQTLcatalogue/Fairfax_2014_naive:eQTLcatalogue/Quach_2016_ge_monocyte_IAV:eQTLcatalogue/Quach_2016_ge_monocyte_naive:eQTLGen_cis_eQTLs:BIOSQTL/BIOS_eQTL_geneLevel:GTEx/v8/Whole_Blood:GTEx/v8/Testis:GTEx/v7/Whole_Blood:GTEx/v7/Spleen	NA	Yes	Aorta:Left_Ventricle:Lung:Pancreas:Spleen:GM12878:IMR90:Mesenchymal_Stem_Cell:Mesendoderm:Neural_Progenitor_Cell:Trophoblast-like_Cell:hESC	1.196e-08	rs641325	38
ENSG00000156599	ZDHHC5	11	57435219	57468659	1	protein_coding	25921	ZDHHC5	0.999924	-0.831025	5	9.02	61	2.8117e-191	0	EyeGEx:eQTLcatalogue/BLUEPRINT_ge_monocyte:eQTLcatalogue/BLUEPRINT_ge_neutrophil:eQTLcatalogue/CEDAR_monocyte_CD14:eQTLcatalogue/CEDAR_neutrophil_CD15:eQTLcatalogue/CEDAR_T-cell_CD4:eQTLcatalogue/CEDAR_T-cell_CD8:eQTLcatalogue/Fairfax_2012_B-cell_CD19:eQTLcatalogue/Fairfax_2014_IFN24:eQTLcatalogue/Fairfax_2014_LPS24:eQTLcatalogue/Fairfax_2014_naive:eQTLcatalogue/GEUVADIS_ge_LCL:eQTLcatalogue/Lepi…	NA	Yes	Adult_Cortex:Fetal_Cortex:Aorta:Left_Ventricle:Lung:Pancreas:Spleen:GM12878:IMR90:Mesenchymal_Stem_Cell:Mesendoderm:Neural_Progenitor_Cell:Trophoblast-like_Cell:hESC	1.196e-08	rs641325	38
ENSG00000156603	MED19	11	57471186	57479693	-1	protein_coding	219541	MED19	0.68379	-0.1517	6	11.04	60	3.27170000000001e-310	0	TIGER/Nom_Alonso_Pancreatic_islets:Nom_InsPIRE_Islets_Gene_eQTLs_Nominal_Pvalues:eQTLcatalogue/Fairfax_2014_IFN24:eQTLcatalogue/Fairfax_2014_LPS24:eQTLcatalogue/Fairfax_2014_LPS2:eQTLcatalogue/Fairfax_2014_naive:eQTLcatalogue/HipSci_ge_iPSC:eQTLcatalogue/Lepik_2017_ge_blood:eQTLcatalogue/Nedelec_2016_ge_macrophage_naive:eQTLcatalogue/TwinsUK_ge_blood:eQTLcatalogue/TwinsUK_ge_fat:eQTLcatalogue/Twi…	NA	Yes	Adult_Cortex:Fetal_Cortex:Aorta:Left_Ventricle:Liver:Spleen:GM12878:IMR90:Mesenchymal_Stem_Cell:Mesendoderm:Trophoblast-like_Cell:hESC	1.196e-08	rs641325	38
ENSG00000213593	TMX2	11	57480072	57508445	1	protein_coding	51075	TMX2	0.429914	0.120517	8	11.04	56	1.45679e-67	0	EyeGEx:eQTLcatalogue/BLUEPRINT_ge_monocyte:eQTLcatalogue/GEUVADIS_ge_LCL:eQTLcatalogue/Quach_2016_ge_monocyte_IAV:PsychENCODE_eQTLs:eQTLGen_cis_eQTLs:BIOSQTL/BIOS_eQTL_geneLevel:GTEx/v8/Whole_Blood:GTEx/v8/Esophagus_Mucosa:GTEx/v8/Nerve_Tibial	NA	Yes	Adult_Cortex:Fetal_Cortex:Aorta:Left_Ventricle:Liver:Spleen:GM12878:IMR90:Mesenchymal_Stem_Cell:Mesendoderm:Trophoblast-like_Cell:hESC	1.196e-08	rs641325	38
ENSG00000254462	TMX2-CTNND1	11	57480077	57559058	1	protein_coding	NA	TMX2-CTNND1	NA	NA	8	11.04	0	NA	NA	NA	NA	Yes	Adult_Cortex:Fetal_Cortex:Aorta:Left_Ventricle:Liver:Spleen:GM12878:IMR90:Mesenchymal_Stem_Cell:Mesendoderm:Trophoblast-like_Cell:hESC	2.926e-06	rs641325	38
ENSG00000211450	C11orf31	11	57508825	57510986	1	protein_coding	280636	C11orf31	0.000781712	-0.641634	1	0.896	17	2.63333e-06	0.002043	GTEx/v8/Thyroid:GTEx/v7/Thyroid	NA	Yes	Adult_Cortex:Fetal_Cortex:GM12878:IMR90:Mesenchymal_Stem_Cell:Mesendoderm:Trophoblast-like_Cell:hESC	1.196e-08	rs641325	38
ENSG00000233436	BTBD18	11	57510986	57519253	-1	protein_coding	643376	BTBD18	NA	-0.504689	0	0	2	0.000191553	0.0387775	BRAINEAC/MEDU	NA	Yes	Promoter_anchored_loops:GM12878:IMR90:Mesenchymal_Stem_Cell:Mesendoderm:Trophoblast-like_Cell:hESC	2.926e-06	rs641325	38
ENSG00000198561	CTNND1	11	57520715	57587018	1	protein_coding	1500	CTNND1	0.995313	-1.42886	1	0.905	29	3.78148e-11	0	eQTLGen_cis_eQTLs:BIOSQTL/BIOS_eQTL_geneLevel:GTEx/v8/Nerve_Tibial:GTEx/v7/Nerve_Tibial	NA	Yes	Adult_Cortex:Aorta:Left_Ventricle:GM12878:IMR90:Mesenchymal_Stem_Cell:Mesendoderm:Trophoblast-like_Cell:hESC	6.877e-07	rs641325	38
ENSG00000186509	OR9Q1	11	57791353	57949088	1	protein_coding	219956	OR9Q1	0.0085949	0.818099	17	9.55	0	NA	NA	NA	NA	Yes	Left_Ventricle:IMR90:Mesendoderm:Trophoblast-like_Cell:hESC	0.004483	rs641325	38
ENSG00000172381	OR6Q1	11	57798402	57799403	1	protein_coding	219952	OR6Q1	0.00486335	-0.127256	1	9.55	0	NA	NA	NA	NA	Yes	Left_Ventricle:IMR90:Mesendoderm:Trophoblast-like_Cell:hESC	NA	rs641325	38
ENSG00000172377	OR9I1	11	57885972	57886916	-1	protein_coding	219954	OR9I1	0.612331	-0.0958818	2	5.651	0	NA	NA	NA	NA	Yes	Left_Ventricle:IMR90:Mesenchymal_Stem_Cell:Mesendoderm:Trophoblast-like_Cell:hESC	1.196e-08	rs641325	38
ENSG00000110031	LPXN	11	58294344	58345693	-1	protein_coding	9404	LPXN	0.0172004	-0.501834	0	0	38	2.1323e-16	0	eQTLGen_cis_eQTLs:GTEx/v8/Brain_Cerebellum	NA	Yes	Promoter_anchored_loops:Adult_Cortex:Fetal_Cortex:Aorta:Left_Ventricle:GM12878:IMR90:Mesenchymal_Stem_Cell:Mesendoderm:Neural_Progenitor_Cell:Trophoblast-like_Cell:hESC	1.196e-08	rs641325	38
ENSG00000186660	ZFP91	11	58346584	58388515	1	protein_coding	80829	ZFP91	0.983773	-0.545159	0	0	36	5.6823e-10	0	eQTLGen_cis_eQTLs	NA	Yes	Promoter_anchored_loops:Adult_Cortex:Fetal_Cortex:Aorta:Left_Ventricle:GM12878:IMR90:Mesenchymal_Stem_Cell:Mesendoderm:Neural_Progenitor_Cell:Trophoblast-like_Cell:hESC	1.196e-08	rs641325	38
ENSG00000242689	CNTF	11	58390146	58393198	1	protein_coding	1270	CNTF	0.000349252	-0.109965	0	0	7	1.9379e-05	7.61744e-28	GTEx/v8/Brain_Cortex:GTEx/v8/Heart_Atrial_Appendage:GTEx/v8/Muscle_Skeletal	NA	Yes	Adult_Cortex:Aorta:Left_Ventricle:Liver:GM12878:IMR90:Mesenchymal_Stem_Cell:Mesendoderm:Neural_Progenitor_Cell:Trophoblast-like_Cell:hESC	1.196e-08	rs641325	38
ENSG00000149516	MS4A3	11	59824060	59838601	1	protein_coding	932	MS4A3	4.21113e-05	-0.575706	0	0	1	7.8807e-06	0.0479233	eQTLGen_trans_eQTLs	NA	No	NA	NA	rs651821;rs180326;rs11604424	44
ENSG00000110077	MS4A6A	11	59939081	59952139	-1	protein_coding	64231	MS4A6A	1.49232e-09	0.437293	0	0	6	5.5427e-09	0.000119679	eQTLGen_trans_eQTLs	NA	No	NA	NA	rs3858704	45
ENSG00000110079	MS4A4A	11	60048014	60076445	1	protein_coding	51338	MS4A4A	0.000743082	-0.23827	0	0	3	5.9545e-06	0.0382641	eQTLGen_trans_eQTLs	NA	Yes	Mesenchymal_Stem_Cell	0.02731	rs4665963;rs780095;rs3858704;rs641325	09:38:45
ENSG00000166927	MS4A7	11	60145955	60163424	1	protein_coding	58475	MS4A7	9.27325e-06	0.410095	0	0	7	1.6045e-08	0.000203093	eQTLGen_trans_eQTLs	NA	No	NA	0.003258	rs3858704	45
ENSG00000156738	MS4A1	11	60223225	60238233	1	protein_coding	931	MS4A1	0.0153882	0.269177	0	0	8	3.2096e-08	0.000422064	eQTLGen_trans_eQTLs	NA	No	NA	0.003258	rs3858704	45
ENSG00000110104	CCDC86	11	60609544	60618554	1	protein_coding	79080	CCDC86	0.00147736	1.05991	0	0	1	5.35318e-06	0.0174759	GTEx/v7/Brain_Caudate_basal_ganglia	NA	No	NA	0.01397	rs174547	39
ENSG00000149506	ZP1	11	60635035	60643166	1	protein_coding	22917	ZP1	4.95779e-10	-0.172753	0	0	1	2.13081e-06	0.0106721	GTEx/v7/Breast_Mammary_Tissue	NA	No	NA	NA	rs174547	39
ENSG00000006118	TMEM132A	11	60691935	60704631	1	protein_coding	54972	TMEM132A	2.88926e-06	NA	0	0	5	5.44304e-05	0.00322175	GTEx/v8/Spleen	NA	No	NA	1.538e-08	rs174547	39
ENSG00000013725	CD6	11	60739115	60787849	1	protein_coding	923	CD6	0.00430466	-0.77189	0	0	3	2.2652e-06	0.017127	eQTLGen_trans_eQTLs	NA	No	NA	NA	rs3858704	45
ENSG00000167987	VPS37C	11	60897728	60929089	-1	protein_coding	55048	VPS37C	0.197171	-0.999412	0	0	17	1.42075e-06	1.50403e-14	eQTLGen_trans_eQTLs:GTEx/v8/Muscle_Skeletal	NA	No	NA	5.374e-06	rs3858704;rs174547	1 day, 15:45:00
ENSG00000229859	PGA3	11	60970779	60980570	1	protein_coding	101929842	PGA3	0.645341	1.44448	0	0	1	4.90133e-06	0.0245067	eQTLcatalogue/CEDAR_B-cell_CD19	NA	No	NA	1.671e-05	rs174547	39
ENSG00000256713	PGA5	11	61008514	61018920	1	protein_coding	5222	PGA5	0.00127358	0.0513857	0	0	5	0.000103115	0.0100968	TIGER/Nom_Alonso_Pancreatic_islets:GTEx/v8/Whole_Blood	NA	No	NA	0.0003328	rs174547	39
ENSG00000167992	VWCE	11	61025762	61062896	-1	protein_coding	220001	VWCE	5.90266e-13	-0.457823	0	0	6	2.1061e-10	0	eQTLGen_trans_eQTLs:GTEx/v8/Esophagus_Mucosa	NA	Yes	Promoter_anchored_loops	2.31e-14	rs6065904;rs435306;rs174547	39:62
ENSG00000167986	DDB1	11	61066923	61110068	-1	protein_coding	1642	DDB1	0.999992	-1.1253	0	0	2	5.74786e-06	0.0362981	GTEx/v7/Cells_EBV-transformed_lymphocytes	NA	No	NA	0.0003325	rs174547	39
ENSG00000149532	CPSF7	11	61170121	61197503	-1	protein_coding	79869	CPSF7	0.99133	-1.55329	0	0	5	6.9374e-06	1.43218e-29	eQTLGen_trans_eQTLs:GTEx/v8/Adipose_Subcutaneous:GTEx/v8/Brain_Cerebellum:GTEx/v8/Thyroid	NA	No	NA	0.0002947	rs3858704;rs174547	1 day, 15:45:00
ENSG00000162148	PPP1R32	11	61248592	61258403	1	protein_coding	220004	PPP1R32	2.68242e-07	-0.326395	0	0	1	0.000147903	8.36713e-19	GTEx/v8/Skin_Sun_Exposed_Lower_leg	NA	No	NA	0.003911	rs174547	39
ENSG00000011347	SYT7	11	61282785	61348620	-1	protein_coding	9066	SYT7	0.904579	NA	0	0	2	6.627e-05	0.0154209	GTEx/v8/Esophagus_Mucosa	NA	No	NA	0.02681	rs174547	39
ENSG00000134780	DAGLA	11	61447905	61514473	1	protein_coding	747	DAGLA	0.953148	-0.966158	0	0	56	1.94097e-07	2.46273e-15	GTEx/v8/Esophagus_Mucosa:GTEx/v8/Testis:GTEx/v7/Esophagus_Mucosa	NA	Yes	Adult_Cortex:Fetal_Cortex	2.255e-09	rs174547	39
ENSG00000124920	MYRF	11	61520114	61555990	1	protein_coding	745	MYRF	0.999848	-1.65959	17	14.1	82	1.2177e-27	0	eQTLcatalogue/Lepik_2017_ge_blood:DICE/T_CD4_naive:DICE/Monocyte_non_classical:DICE/T_CD4_TFH:DICE/T_CD4_TH1:DICE/T_CD4_TH17:DICE/T_CD4_TH2:DICE/T_CD4_memory_TREG:DICE/T_CD4_naive_TREG:eQTLGen_cis_eQTLs:BIOSQTL/BIOS_eQTL_geneLevel:GTEx/v8/Adipose_Subcutaneous:GTEx/v8/Whole_Blood:GTEx/v8/Esophagus_Mucosa:GTEx/v8/Liver:GTEx/v8/Thyroid:GTEx/v7/Esophagus_Mucosa:GTEx/v6/Adipose_Subcutaneous:GTEx/v6/Es…	NA	Yes	Promoter_anchored_loops	2.255e-09	rs174547	39
ENSG00000134825	TMEM258	11	61535973	61560274	-1	protein_coding	746	TMEM258	0.000864646	0.122739	20	14.1	92	3.0821e-267	0	EyeGEx:eQTLcatalogue/BLUEPRINT_ge_monocyte:eQTLcatalogue/BLUEPRINT_ge_T-cell:eQTLcatalogue/CEDAR_T-cell_CD4:eQTLcatalogue/CEDAR_T-cell_CD8:eQTLcatalogue/Fairfax_2012_B-cell_CD19:eQTLcatalogue/Fairfax_2014_naive:eQTLcatalogue/GEUVADIS_ge_LCL:eQTLcatalogue/Kasela_2017_T-cell_CD4:eQTLcatalogue/Kasela_2017_T-cell_CD8:eQTLcatalogue/Lepik_2017_ge_blood:eQTLcatalogue/TwinsUK_ge_LCL:PsychENCODE_eQTLs:DIC…	NA	Yes	Adult_Cortex:Fetal_Cortex:IMR90	2.255e-09	rs174547	39
ENSG00000168496	FEN1	11	61560109	61564716	1	protein_coding	2237	FEN1	3.47774e-05	-0.45994	17	14.1	71	5.02027e-32	0	eQTLGen_cis_eQTLs:BIOSQTL/BIOS_eQTL_geneLevel:CMC_SVA_cis:GTEx/v8/Muscle_Skeletal:GTEx/v8/Skin_Not_Sun_Exposed_Suprapubic:GTEx/v7/Muscle_Skeletal	NA	Yes	Adult_Cortex:Fetal_Cortex:IMR90	2.255e-09	rs174547	39
ENSG00000134824	FADS2	11	61560452	61634826	1	protein_coding	9415	FADS2	0.990052	-0.476246	85	14.1	86	3.27170000000001e-310	0	TIGER/Nom_Alonso_Pancreatic_islets:EyeGEx:eQTLcatalogue/Alasoo_2018_ge_macrophage_IFNg_Salmonella:eQTLcatalogue/Alasoo_2018_ge_macrophage_IFNg:eQTLcatalogue/Alasoo_2018_ge_macrophage_naive:eQTLcatalogue/Alasoo_2018_ge_macrophage_Salmonella:eQTLcatalogue/BLUEPRINT_ge_monocyte:eQTLcatalogue/BLUEPRINT_ge_neutrophil:eQTLcatalogue/BLUEPRINT_ge_T-cell:eQTLcatalogue/Fairfax_2014_IFN24:eQTLcatalogue/Fair…	NA	Yes	Adult_Cortex:Fetal_Cortex:IMR90	2.404e-13	rs174547;rs1065853	39:60
ENSG00000149485	FADS1	11	61567099	61596790	-1	protein_coding	100302263	FADS1	0.383801	-0.763753	60	14.1	94	3.27170000000001e-310	0	TIGER/Nom_Alonso_Pancreatic_islets:Nom_InsPIRE_Islets_Gene_eQTLs_Nominal_Pvalues:EyeGEx:eQTLcatalogue/BLUEPRINT_ge_T-cell:eQTLcatalogue/BrainSeq_ge_brain:eQTLcatalogue/CEDAR_B-cell_CD19:eQTLcatalogue/CEDAR_neutrophil_CD15:eQTLcatalogue/CEDAR_T-cell_CD4:eQTLcatalogue/CEDAR_T-cell_CD8:eQTLcatalogue/Fairfax_2012_B-cell_CD19:eQTLcatalogue/Fairfax_2014_IFN24:eQTLcatalogue/Fairfax_2014_LPS2:eQTLcatalog…	NA	Yes	IMR90	2.255e-09	rs174547;rs651821;rs180326;rs11604424	1 day, 15:44:00
ENSG00000221968	FADS3	11	61640991	61659523	-1	protein_coding	3995	FADS3	0.0488722	NA	2	3.867	68	1.79311e-11	1.726e-07	eQTLcatalogue/Quach_2016_ge_monocyte_naive:eQTLcatalogue/Quach_2016_ge_monocyte_Pam3CSK4:DICE/T_CD4_TFH:DICE/T_CD4_memory_TREG:eQTLGen_cis_eQTLs:GTEx/v8/Brain_Cerebellar_Hemisphere:GTEx/v8/Brain_Cerebellum:GTEx/v8/Liver:GTEx/v8/Muscle_Skeletal:GTEx/v8/Skin_Not_Sun_Exposed_Suprapubic:GTEx/v7/Brain_Cerebellum:GTEx/v7/Liver:GTEx/v6/Brain_Cerebellum:GTEx/v6/Liver	NA	Yes	Promoter_anchored_loops:Adult_Cortex:Fetal_Cortex:IMR90	2.255e-09	rs174547	39
ENSG00000167994	RAB3IL1	11	61664773	61687741	-1	protein_coding	5866	RAB3IL1	0.000894541	-0.364568	0	0	3	1.9756e-09	1.02357e-37	eQTLcatalogue/Fairfax_2014_IFN24:eQTLcatalogue/Fairfax_2014_naive:eQTLGen_cis_eQTLs:GTEx/v8/Whole_Blood	NA	Yes	IMR90	2.255e-09	rs174547	39
ENSG00000167995	BEST1	11	61717293	61732987	1	protein_coding	7439	BEST1	4.88562e-08	0.261397	0	0	63	3.6635e-24	0	eQTLGen_cis_eQTLs:eQTLGen_trans_eQTLs:BIOSQTL/BIOS_eQTL_geneLevel:GTEx/v8/Esophagus_Muscularis	NA	Yes	IMR90	2.255e-09	rs174547;rs3858704	1 day, 15:45:00
ENSG00000167996	FTH1	11	61727190	61735132	-1	protein_coding	2495	FTH1	0.918437	NA	0	0	53	1.5909e-14	0	eQTLGen_cis_eQTLs	NA	Yes	IMR90	2.255e-09	rs174547	39
ENSG00000149503	INCENP	11	61891445	61920635	1	protein_coding	3619	INCENP	0.996087	0.518653	0	0	1	2.71244e-06	0.000263002	GTEx/v6/Artery_Tibial	NA	Yes	Promoter_anchored_loops	4.593e-09	rs174547	39
ENSG00000124942	AHNAK	11	62201016	62323707	-1	protein_coding	79026	AHNAK	0.344567	-0.479742	0	0	8	2.4209e-12	0	eQTLGen_trans_eQTLs	NA	Yes	IMR90	2.255e-09	rs3858704;rs174547	1 day, 15:45:00
ENSG00000149016	TUT1	11	62342517	62359649	-1	protein_coding	64852	TUT1	9.9851e-06	-0.411889	0	0	4	2.2187e-05	0.0347068	GTEx/v7/Esophagus_Muscularis	NA	Yes	IMR90	2.255e-09	rs174547	39
ENSG00000149541	B3GAT3	11	62382768	62389647	-1	protein_coding	26229	B3GAT3	0.000286975	-0.288759	0	0	4	5.66585e-05	0.0435735	GTEx/v8/Pancreas	NA	Yes	Promoter_anchored_loops	1.538e-08	rs174547	39
ENSG00000089597	GANAB	11	62392298	62414104	-1	protein_coding	23193	GANAB	0.999948	-1.00534	0	0	5	4.0164e-06	0.0180353	GTEx/v8/Liver	NA	No	NA	0.005716	rs174547	39
ENSG00000214756	METTL12	11	62432781	62435968	1	protein_coding	751071	METTL12	0.00946026	-0.808108	0	0	1	NA	0.049	CMC_SVA_cis	NA	Yes	Adult_Cortex	1.724e-08	rs174547	39
ENSG00000177363	LRRN4CL	11	62453874	62457371	-1	protein_coding	221091	LRRN4CL	5.43721e-05	-0.633532	0	0	1	7.9937e-05	0.0379404	GTEx/v8/Heart_Atrial_Appendage	NA	No	NA	0.02681	rs174547	39
ENSG00000168000	BSCL2	11	62457747	62477317	-1	protein_coding	26580	BSCL2	0.00852541	-0.902568	0	0	5	4.46366e-06	8.07586e-31	GTEx/v8/Esophagus_Muscularis	NA	No	NA	0.003911	rs174547	39
ENSG00000168002	POLR2G	11	62529016	62534182	1	protein_coding	5436	POLR2G	0.0064654	NA	0	0	2	1.15693e-06	0.00596002	GTEx/v6/Testis	NA	No	NA	5.374e-06	rs174547	39
ENSG00000185475	TMEM179B	11	62554887	62557877	1	protein_coding	102465448	TMEM179B	0.0107812	0.0443474	0	0	1	8.72729e-05	0.00565068	GTEx/v8/Esophagus_Muscularis	NA	No	NA	NA	rs174547	39
ENSG00000162231	NXF1	11	62559595	62573774	-1	protein_coding	10482	NXF1	0.99899	-0.850328	0	0	1	2.1584e-06	0.0164531	eQTLGen_trans_eQTLs	NA	No	NA	6.823e-13	rs201019550	58
ENSG00000133317	LGALS12	11	63273556	63284246	1	protein_coding	85329	LGALS12	2.68574e-09	0.865647	0	0	3	9.3618e-07	0.00775837	eQTLGen_trans_eQTLs	NA	No	NA	0.003258	rs3858704	45
ENSG00000133321	RARRES3	11	63304281	63313934	1	protein_coding	5920	RARRES3	0.000504117	-0.0612309	0	0	7	1.2984e-09	5.81846e-05	eQTLGen_trans_eQTLs	NA	No	NA	0.003258	rs3858704	45
ENSG00000133318	RTN3	11	63448918	63527363	1	protein_coding	10313	RTN3	0.0400228	-0.940535	0	0	1	NA	0.049	CMC_NoSVA_cis:CMC_NoSVA_trans	NA	No	NA	0.002802	rs10892023;rs11604424	44
ENSG00000168067	MAP4K2	11	64556290	64570713	-1	protein_coding	5871	MAP4K2	6.47662e-05	NA	0	0	1	1.17426e-12	7.09919e-05	xQTLServer_eQTLs	NA	No	NA	0.003	rs55908146	22
ENSG00000171219	CDC42BPG	11	64590859	64612041	-1	protein_coding	55561	CDC42BPG	1.40628e-17	0.981238	0	0	3	0.000152343	1.5563e-16	GTEx/v8/Artery_Tibial:GTEx/v8/Skin_Not_Sun_Exposed_Suprapubic	NA	Yes	Adult_Cortex:Fetal_Cortex	8.489e-07	rs10896022	40
ENSG00000110047	EHD1	11	64619114	64655768	-1	protein_coding	10938	EHD1	0.894832	-0.0395511	0	0	8	1.8302e-09	5.64865e-05	eQTLGen_trans_eQTLs	NA	No	NA	0.003258	rs3858704	45
ENSG00000068971	PPP2R5B	11	64685025	64701945	1	protein_coding	5526	PPP2R5B	0.932459	-0.287606	0	0	5	3.9026e-14	0	eQTLGen_trans_eQTLs	NA	Yes	Promoter_anchored_loops	1.65e-11	rs2285626;rs12979148;rs7249692;rs5754422;rs10896022	40:59:63
ENSG00000168070	C11orf85	11	64704989	64739557	-1	protein_coding	283129	C11orf85	0.00735719	-0.23067	0	0	3	2.88841e-05	0.049	DICE/Monocyte_non_classical	NA	Yes	Adult_Cortex	0.001982	rs10896022	40
ENSG00000168062	BATF2	11	64755415	64764517	-1	protein_coding	116071	BATF2	0.0295319	0.262741	0	0	8	2.6265e-27	0	eQTLGen_trans_eQTLs	NA	Yes	Promoter_anchored_loops	0.0001597	rs3858704;rs10896022	1 day, 16:45:00
ENSG00000213465	ARL2	11	64781585	64789656	1	protein_coding	402	ARL2	0.00739854	-0.589656	0	0	1	9.4096e-07	3.46586e-30	eQTLGen_cis_eQTLs:GTEx/v8/Muscle_Skeletal	NA	Yes	Adult_Cortex:Fetal_Cortex	2.291e-06	rs10896022	40
ENSG00000149823	VPS51	11	64856796	64879332	1	protein_coding	738	VPS51	6.3802e-05	-0.438897	0	0	3	0.000105634	0.0382287	BRAINEAC/MEDU	NA	Yes	Promoter_anchored_loops:Adult_Cortex:Fetal_Cortex	2.59e-06	rs10896022	40
ENSG00000162298	SYVN1	11	64889252	64902004	-1	protein_coding	102465449	SYVN1	0.99665	-0.305714	0	0	12	1.71903e-05	0.00186819	GTEx/v8/Brain_Amygdala:GTEx/v8/Skin_Sun_Exposed_Lower_leg	NA	Yes	Adult_Cortex:Fetal_Cortex:GM12878	2.291e-06	rs10896022	40
ENSG00000204710	SPDYC	11	64937625	64940715	1	protein_coding	387778	SPDYC	0.00185515	0.11629	0	0	35	1.3734e-26	0	eQTLGen_cis_eQTLs	NA	No	NA	3.828e-09	rs10896022	40
ENSG00000254614	AP003068.23	11	64945077	64949305	-1	protein_coding	NA	NA	NA	NA	0	0	19	8.9183e-15	0	eQTLGen_cis_eQTLs:GTEx/v8/Colon_Transverse:GTEx/v8/Muscle_Skeletal	NA	No	NA	2.291e-06	rs10896022	40
ENSG00000014216	CAPN1	11	64948037	64979477	1	protein_coding	823	CAPN1	5.0044e-05	-0.856028	0	0	13	7.3564e-15	0	eQTLGen_cis_eQTLs	NA	No	NA	0.0001024	rs10896022	40
ENSG00000014138	POLA2	11	65029233	65073060	1	protein_coding	23649	POLA2	0.000215959	-1.30172	0	0	4	3.0982e-06	8.73857e-41	eQTLGen_cis_eQTLs:eQTLGen_trans_eQTLs:GTEx/v8/Testis:GTEx/v7/Testis	NA	Yes	Promoter_anchored_loops:Adult_Cortex:Fetal_Cortex	2.291e-06	rs10896022;rs3858704	1 day, 16:45:00
ENSG00000133884	DPF2	11	65101225	65120720	1	protein_coding	5977	DPF2	0.999787	-0.703359	0	0	10	1.2825e-11	0	eQTLGen_cis_eQTLs	NA	Yes	Adult_Cortex:Fetal_Cortex:GM12878:IMR90	0.0001024	rs10896022	40
ENSG00000162241	SLC25A45	11	65142663	65151172	-1	protein_coding	283130	SLC25A45	7.2017e-07	-0.9201	0	0	3	0.000118536	0.000116266	GTEx/v8/Skin_Not_Sun_Exposed_Suprapubic	NA	Yes	EP_links_oneway:Promoter_anchored_loops:Hippocampus:Left_Ventricle:Liver:Pancreas:Spleen:GM12878:IMR90:Mesenchymal_Stem_Cell:Mesendoderm:hESC	0.0001024	rs10896022	40
ENSG00000126391	FRMD8	11	65154070	65180996	1	protein_coding	83786	FRMD8	0.0842909	-0.199408	0	0	3	NA	0.009	CMC_SVA_cis	NA	Yes	Promoter_anchored_loops:Hippocampus:Left_Ventricle:Liver:Pancreas:Spleen:GM12878:IMR90:Mesenchymal_Stem_Cell:Mesendoderm:hESC	0.0001024	rs10896022	40
ENSG00000173727	AP000769.1	11	65222728	65234028	1	protein_coding	101927789	NA	NA	NA	1	2.159	40	8.0343e-21	0	eQTLGen_cis_eQTLs:BIOSQTL/BIOS_eQTL_geneLevel:GTEx/v8/Esophagus_Muscularis:GTEx/v8/Heart_Atrial_Appendage:GTEx/v8/Muscle_Skeletal:GTEx/v8/Nerve_Tibial:GTEx/v8/Cells_Cultured_fibroblasts:GTEx/v8/Skin_Sun_Exposed_Lower_leg:GTEx/v8/Spleen:GTEx/v8/Uterus:GTEx/v7/Muscle_Skeletal:GTEx/v7/Nerve_Tibial:GTEx/v7/Cells_Transformed_fibroblasts:GTEx/v6/Muscle_Skeletal:GTEx/v6/Cells_Transformed_fibroblasts	NA	Yes	Promoter_anchored_loops:Adult_Cortex:Fetal_Cortex:Left_Ventricle:GM12878:IMR90:Mesenchymal_Stem_Cell	3.828e-09	rs10896022	40
ENSG00000142186	SCYL1	11	65292548	65306175	1	protein_coding	57410	SCYL1	0.00778441	NA	7	9.565	0	NA	NA	NA	NA	Yes	Promoter_anchored_loops:Adult_Cortex:Fetal_Cortex:GM12878	2.291e-06	rs10896022	40
ENSG00000168056	LTBP3	11	65306276	65326401	-1	protein_coding	4054	LTBP3	0.996034	NA	8	12.77	48	3.27170000000001e-310	0	TIGER/Nom_Alonso_Pancreatic_islets:eQTLcatalogue/BLUEPRINT_ge_T-cell:eQTLcatalogue/GENCORD_ge_fibroblast:eQTLcatalogue/GENCORD_ge_T-cell:eQTLcatalogue/Lepik_2017_ge_blood:eQTLcatalogue/TwinsUK_ge_blood:eQTLGen_cis_eQTLs:eQTLGen_trans_eQTLs:BIOSQTL/BIOS_eQTL_geneLevel:GTEx/v8/Adipose_Subcutaneous:GTEx/v8/Adipose_Visceral_Omentum:GTEx/v8/Whole_Blood:GTEx/v8/Artery_Tibial:GTEx/v8/Breast_Mammary_Tiss…	NA	Yes	Promoter_anchored_loops:Adult_Cortex:Fetal_Cortex	3.828e-09	rs10896022;rs3858704	1 day, 16:45:00
ENSG00000173465	SSSCA1	11	65337901	65341413	1	protein_coding	10534	SSSCA1	0.00200151	-0.0763605	3	10.27	0	NA	NA	NA	NA	Yes	Promoter_anchored_loops:Adult_Cortex:Fetal_Cortex	2.291e-06	rs10896022	40
ENSG00000176973	FAM89B	11	65339820	65341669	1	protein_coding	23625	FAM89B	0.0291385	NA	3	10.27	18	5.8805e-10	0	eQTLGen_cis_eQTLs	NA	Yes	EP_links_oneway:Promoter_anchored_loops:Adult_Cortex:Fetal_Cortex	3.828e-09	rs10896022	40
ENSG00000173442	EHBP1L1	11	65343509	65360121	1	protein_coding	254102	EHBP1L1	8.08132e-07	NA	19	10.27	39	4.1015e-34	0	eQTLGen_cis_eQTLs:BIOSQTL/BIOS_eQTL_geneLevel:GTEx/v8/Whole_Blood:GTEx/v8/Heart_Left_Ventricle:GTEx/v8/Nerve_Tibial	NA	Yes	Promoter_anchored_loops	3.828e-09	rs10896022	40
ENSG00000269018	AP001362.1	11	65358665	65359947	-1	protein_coding	NA	NA	NA	NA	16	8.022	34	2.51148e-20	0	BIOSQTL/BIOS_eQTL_geneLevel	NA	Yes	Promoter_anchored_loops:Adult_Cortex:Fetal_Cortex	3.828e-09	rs10896022	40
ENSG00000173338	KCNK7	11	65360326	65363467	-1	protein_coding	10089	KCNK7	6.42726e-06	0.176005	16	8.022	41	3.9699e-19	0	eQTLcatalogue/BrainSeq_ge_brain:eQTLGen_cis_eQTLs:BIOSQTL/BIOS_eQTL_geneLevel:GTEx/v8/Adipose_Subcutaneous:GTEx/v8/Adipose_Visceral_Omentum:GTEx/v8/Artery_Aorta:GTEx/v8/Artery_Tibial:GTEx/v8/Brain_Caudate_basal_ganglia:GTEx/v8/Brain_Hypothalamus:GTEx/v8/Colon_Sigmoid:GTEx/v8/Colon_Transverse:GTEx/v8/Esophagus_Gastroesophageal_Junction:GTEx/v8/Esophagus_Mucosa:GTEx/v8/Esophagus_Muscularis:GTEx/v8/…	NA	Yes	Promoter_anchored_loops	3.828e-09	rs10896022	40
ENSG00000173327	MAP3K11	11	65365226	65382853	-1	protein_coding	4296	MAP3K11	0.170283	-0.757764	17	22.4	41	3.27170000000001e-310	0	eQTLcatalogue/BLUEPRINT_ge_T-cell:eQTLcatalogue/Fairfax_2012_B-cell_CD19:eQTLcatalogue/Fairfax_2014_naive:eQTLcatalogue/Kasela_2017_T-cell_CD4:eQTLcatalogue/Kasela_2017_T-cell_CD8:eQTLcatalogue/Lepik_2017_ge_blood:eQTLcatalogue/Naranbhai_2015_neutrophil_CD16:eQTLcatalogue/TwinsUK_ge_fat:eQTLcatalogue/TwinsUK_ge_skin:PsychENCODE_eQTLs:eQTLGen_cis_eQTLs:BIOSQTL/BIOS_eQTL_geneLevel:GTEx/v8/Adipose_S…	NA	Yes	Promoter_anchored_loops	3.828e-09	rs10896022	40
ENSG00000197136	PCNXL3	11	65383244	65404910	1	protein_coding	399909	PCNXL3	0.48826	NA	5	22.4	28	3.80747e-18	0	eQTLGen_cis_eQTLs:BIOSQTL/BIOS_eQTL_geneLevel:GTEx/v8/Adipose_Subcutaneous:GTEx/v8/Artery_Aorta:GTEx/v8/Artery_Tibial:GTEx/v8/Brain_Cerebellum:GTEx/v8/Colon_Sigmoid:GTEx/v8/Colon_Transverse:GTEx/v8/Esophagus_Gastroesophageal_Junction:GTEx/v8/Esophagus_Mucosa:GTEx/v8/Esophagus_Muscularis:GTEx/v8/Heart_Atrial_Appendage:GTEx/v8/Muscle_Skeletal:GTEx/v8/Nerve_Tibial:GTEx/v8/Ovary:GTEx/v8/Testis:GTEx/v…	NA	Yes	Promoter_anchored_loops	3.828e-09	rs10896022	40
ENSG00000213445	SIPA1	11	65405568	65418401	1	protein_coding	6494	SIPA1	0.0279051	-0.251279	4	10.29	8	0.000104607	2.95908e-15	CMC_SVA_cis:GTEx/v8/Nerve_Tibial	NA	Yes	Promoter_anchored_loops:Adult_Cortex:Fetal_Cortex	2.291e-06	rs10896022	40
ENSG00000173039	RELA	11	65421067	65430565	-1	protein_coding	5970	RELA	0.998828	NA	2	6.966	0	NA	NA	NA	NA	Yes	Adult_Cortex:Fetal_Cortex	2.291e-06	rs10896022	40
ENSG00000172977	KAT5	11	65479467	65487075	1	protein_coding	10524	KAT5	0.471178	-0.933539	0	0	36	1.44711e-55	0	eQTLGen_cis_eQTLs:BIOSQTL/BIOS_eQTL_geneLevel:GTEx/v8/Whole_Blood:GTEx/v8/Skin_Not_Sun_Exposed_Suprapubic:GTEx/v7/Skin_Not_Sun_Exposed_Suprapubic	NA	No	NA	3.828e-09	rs10896022	40
ENSG00000172922	RNASEH2C	11	65482367	65488418	-1	protein_coding	84153	RNASEH2C	0.511932	-0.196964	0	0	41	2.401e-253	0	TIGER/Nom_Alonso_Pancreatic_islets:EyeGEx:eQTLcatalogue/BLUEPRINT_ge_monocyte:eQTLcatalogue/BLUEPRINT_ge_T-cell:eQTLcatalogue/BrainSeq_ge_brain:eQTLcatalogue/Fairfax_2012_B-cell_CD19:eQTLcatalogue/Fairfax_2014_naive:eQTLcatalogue/GEUVADIS_ge_LCL:eQTLcatalogue/HipSci_ge_iPSC:eQTLcatalogue/Kasela_2017_T-cell_CD8:eQTLcatalogue/Lepik_2017_ge_blood:eQTLcatalogue/TwinsUK_ge_blood:eQTLcatalogue/TwinsUK_…	NA	Yes	Adult_Cortex:Fetal_Cortex	3.828e-09	rs10896022	40
ENSG00000254470	AP5B1	11	65543364	65548273	-1	protein_coding	91056	AP5B1	6.97158e-06	0.442298	0	0	27	6.2062e-16	0	eQTLGen_cis_eQTLs:BIOSQTL/BIOS_eQTL_geneLevel:GTEx/v8/Adipose_Subcutaneous:GTEx/v8/Artery_Tibial:GTEx/v8/Esophagus_Mucosa:GTEx/v8/Esophagus_Muscularis	NA	Yes	Adult_Cortex:Fetal_Cortex	3.828e-09	rs10896022	40
ENSG00000172818	OVOL1	11	65554493	65564690	1	protein_coding	5017	OVOL1	0.676796	-0.557877	0	0	22	1.27983e-11	8.09329e-17	GTEx/v8/Brain_Anterior_cingulate_cortex_BA24:GTEx/v8/Brain_Cerebellum:GTEx/v8/Thyroid:GTEx/v7/Brain_Cerebellum:GTEx/v7/Brain_Cortex:GTEx/v7/Thyroid:GTEx/v6/Thyroid	NA	No	NA	3.828e-09	rs10896022	40
ENSG00000172757	CFL1	11	65590493	65629497	-1	protein_coding	1072	CFL1	0.73105	-1.41934	0	0	23	1.1267e-15	0	eQTLGen_cis_eQTLs:BIOSQTL/BIOS_eQTL_geneLevel:GTEx/v8/Thyroid	NA	Yes	Adult_Cortex:Fetal_Cortex	3.828e-09	rs10896022	40
ENSG00000172803	SNX32	11	65601112	65624367	1	protein_coding	254122	SNX32	2.72867e-13	0.151678	0	0	41	1.6495e-47	0	TIGER/Nom_Alonso_Pancreatic_islets:EyeGEx:eQTLcatalogue/GENCORD_ge_T-cell:eQTLcatalogue/GEUVADIS_ge_LCL:eQTLcatalogue/HipSci_ge_iPSC:eQTLcatalogue/TwinsUK_ge_fat:eQTLcatalogue/TwinsUK_ge_LCL:eQTLcatalogue/TwinsUK_ge_skin:PsychENCODE_eQTLs:eQTLGen_cis_eQTLs:BIOSQTL/BIOS_eQTL_geneLevel:xQTLServer_eQTLs:CMC_SVA_cis:CMC_NoSVA_cis:BRAINEAC/FCTX:BRAINEAC/aveALL:GTEx/v8/Adipose_Subcutaneous:GTEx/v8/Adip…	NA	Yes	Adult_Cortex:Fetal_Cortex	3.828e-09	rs10896022	40
ENSG00000172732	MUS81	11	65624597	65635124	1	protein_coding	80198	MUS81	1.57726e-06	-0.100509	0	0	36	3.8047e-15	0	eQTLGen_cis_eQTLs:BIOSQTL/BIOS_eQTL_geneLevel:CMC_SVA_cis	NA	Yes	Adult_Cortex:Fetal_Cortex	3.828e-09	rs10896022	40
ENSG00000172638	EFEMP2	11	65633912	65641063	-1	protein_coding	30008	EFEMP2	0.0283882	NA	0	0	16	3.0989e-22	0	eQTLGen_cis_eQTLs:GTEx/v8/Artery_Aorta:GTEx/v8/Artery_Tibial:GTEx/v8/Esophagus_Mucosa	NA	Yes	Promoter_anchored_loops:Adult_Cortex:Fetal_Cortex	3.828e-09	rs10896022	40
ENSG00000172543	CTSW	11	65647280	65651212	1	protein_coding	1521	CTSW	2.6259e-07	0.389375	0	0	41	4.7386e-221	0	eQTLcatalogue/CEDAR_T-cell_CD8:eQTLcatalogue/Lepik_2017_ge_blood:eQTLGen_cis_eQTLs:BIOSQTL/BIOS_eQTL_geneLevel:GTEx/v8/Adipose_Subcutaneous:GTEx/v8/Adipose_Visceral_Omentum:GTEx/v8/Adrenal_Gland:GTEx/v8/Whole_Blood:GTEx/v8/Artery_Aorta:GTEx/v8/Artery_Coronary:GTEx/v8/Artery_Tibial:GTEx/v8/Breast_Mammary_Tissue:GTEx/v8/Colon_Sigmoid:GTEx/v8/Colon_Transverse:GTEx/v8/Esophagus_Gastroesophageal_Junct…	NA	Yes	Promoter_anchored_loops:Adult_Cortex:Fetal_Cortex	3.828e-09	rs10896022	40
ENSG00000172500	FIBP	11	65651212	65656010	-1	protein_coding	9158	FIBP	0.0147228	-0.597473	0	0	40	2.4645e-36	0	eQTLcatalogue/GEUVADIS_ge_LCL:eQTLcatalogue/HipSci_ge_iPSC:eQTLcatalogue/TwinsUK_ge_LCL:eQTLGen_cis_eQTLs:BIOSQTL/BIOS_eQTL_geneLevel:CMC_SVA_cis:GTEx/v8/Adipose_Visceral_Omentum:GTEx/v8/Breast_Mammary_Tissue:GTEx/v8/Esophagus_Mucosa:GTEx/v8/Esophagus_Muscularis:GTEx/v8/Heart_Atrial_Appendage:GTEx/v8/Heart_Left_Ventricle:GTEx/v8/Muscle_Skeletal:GTEx/v8/Nerve_Tibial:GTEx/v8/Cells_Cultured_fibrobla…	NA	Yes	Adult_Cortex:Fetal_Cortex	3.828e-09	rs10896022	40
ENSG00000175573	C11orf68	11	65684279	65686588	-1	protein_coding	83638	C11orf68	0.409499	NA	0	0	4	6.69148e-06	0.00787692	GTEx/v8/Heart_Atrial_Appendage	NA	Yes	Promoter_anchored_loops	NA	rs10896022	40
ENSG00000175376	EIF1AD	11	65764016	65769647	-1	protein_coding	84285	EIF1AD	0.181571	0.402588	0	0	7	9.85482e-06	6.8737e-21	GTEx/v8/Artery_Aorta:GTEx/v8/Liver:GTEx/v8/Skin_Sun_Exposed_Lower_leg:GTEx/v8/Testis:GTEx/v7/Artery_Aorta:GTEx/v7/Skin_Sun_Exposed_Lower_leg	NA	No	NA	8.489e-07	rs10896022	40
ENSG00000175334	BANF1	11	65769550	65771620	1	protein_coding	8815	BANF1	0.739287	-0.489761	0	0	28	1.7819e-32	0	eQTLGen_cis_eQTLs:GTEx/v8/Lung	NA	No	NA	3.828e-09	rs10896022	40
ENSG00000175229	GAL3ST3	11	65809423	65816651	-1	protein_coding	89792	GAL3ST3	1.24669e-06	-0.117015	0	0	1	6.90133e-05	0.0176155	GTEx/v7/Esophagus_Muscularis	NA	Yes	Promoter_anchored_loops:Adult_Cortex:Fetal_Cortex	2.291e-06	rs10896022	40
ENSG00000087365	SF3B2	11	65818200	65836779	1	protein_coding	10992	SF3B2	0.99946	-0.0687926	0	0	1	7.71032e-05	1.04853e-38	EyeGEx:GTEx/v8/Lung	NA	Yes	Promoter_anchored_loops:Adult_Cortex:Fetal_Cortex	8.489e-07	rs10896022	40
ENSG00000255038	RP11-1167A19.2	11	65834748	65837090	-1	protein_coding	NA	NA	NA	NA	0	0	3	0.000216995	0.0106118	GTEx/v8/Nerve_Tibial	NA	Yes	Promoter_anchored_loops:Fetal_Cortex	2.291e-06	rs10896022	40
ENSG00000174996	KLC2	11	66024765	66035331	1	protein_coding	64837	KLC2	0.997255	-0.615954	0	0	1	9.28499e-05	9.12335e-16	GTEx/v7/Esophagus_Mucosa	NA	No	NA	NA	rs10896022	40
ENSG00000179292	TMEM151A	11	66059341	66064135	1	protein_coding	256472	TMEM151A	0.788175	NA	0	0	4	1.06936e-05	0.00487487	GTEx/v7/Skin_Sun_Exposed_Lower_leg	NA	Yes	Promoter_anchored_loops:Adult_Cortex:Fetal_Cortex	2.291e-06	rs10896022	40
ENSG00000174744	BRMS1	11	66104804	66112596	-1	protein_coding	25855	BRMS1	0.00107652	-0.593186	0	0	6	1.24911e-05	0.0067353	GTEx/v8/Breast_Mammary_Tissue	NA	Yes	Adult_Cortex:Fetal_Cortex	2.291e-06	rs10896022	40
ENSG00000174165	ZDHHC24	11	66288108	66313709	-1	protein_coding	254359	ZDHHC24	0.00614031	-0.199989	0	0	9	3.0593e-06	0.00885678	eQTLGen_cis_eQTLs:GTEx/v7/Brain_Hypothalamus	NA	Yes	Promoter_anchored_loops	2.291e-06	rs10896022	40
ENSG00000174080	CTSF	11	66330934	66336312	-1	protein_coding	8722	CTSF	1.32811e-13	0.919673	0	0	7	7.4779e-13	0	eQTLGen_cis_eQTLs	NA	No	NA	2.291e-06	rs10896022	40
ENSG00000173715	C11orf80	11	66511922	66610987	1	protein_coding	79703	C11orf80	0.0084626	NA	0	0	7	9.0519e-09	0.000164177	eQTLGen_trans_eQTLs	NA	No	NA	0.003258	rs3858704	45
ENSG00000173120	KDM2A	11	66886740	67025558	1	protein_coding	22992	KDM2A	1	-1.43384	0	0	3	3.0952e-06	0.0222482	eQTLGen_trans_eQTLs	NA	No	NA	NA	rs3858704	45
ENSG00000172508	CARNS1	11	67182439	67193078	1	protein_coding	57571	CARNS1	0.022129	0.291848	0	0	3	3.882e-06	0.0268221	eQTLGen_trans_eQTLs	NA	No	NA	NA	rs3858704	45
ENSG00000137496	IL18BP	11	71709587	71716761	1	protein_coding	10068	IL18BP	3.32666e-06	-0.379059	0	0	7	9.9605e-09	0.000162602	eQTLGen_trans_eQTLs	NA	No	NA	0.003258	rs3858704	45
ENSG00000137497	NUMA1	11	71713910	71791739	-1	protein_coding	4926	NUMA1	0.999999	0.143888	0	0	1	6.495e-06	0.0409506	eQTLGen_trans_eQTLs	NA	No	NA	NA	rs3858704	45
ENSG00000214530	STARD10	11	72465774	72504726	-1	protein_coding	10809	STARD10	0.0510371	-0.457697	0	0	1	5.3646e-06	0.034861	eQTLGen_trans_eQTLs	NA	No	NA	1.11e-12	rs780095	9
ENSG00000021300	PLEKHB1	11	73357223	73373864	1	protein_coding	58473	PLEKHB1	0.000703307	0.0592852	0	0	5	8.4615e-08	0.00103147	eQTLGen_trans_eQTLs	NA	No	NA	NA	rs3858704	45
ENSG00000175567	UCP2	11	73685712	73694352	-1	protein_coding	7351	UCP2	1.91977e-08	0.0488261	0	0	6	4.7775e-08	0.000629547	eQTLGen_trans_eQTLs	NA	No	NA	NA	rs3858704	45
ENSG00000077514	POLD3	11	74204896	74380162	1	protein_coding	10714	POLD3	0.991394	-0.780531	0	0	8	2.6669e-10	0	eQTLGen_trans_eQTLs	NA	No	NA	0.003258	rs3858704	45
ENSG00000166435	XRRA1	11	74518784	74660245	-1	protein_coding	143570	XRRA1	4.24982e-05	0.529222	0	0	28	8.0315e-05	0.00147523	BRAINEAC/CRBL:BRAINEAC/FCTX:BRAINEAC/HIPP:BRAINEAC/OCTX:BRAINEAC/aveALL	NA	No	NA	5.83e-09	rs695110	41
ENSG00000261594	TPBGL	11	74951950	74954742	1	protein_coding	100507050	TPBGL	NA	0.42776	0	0	3	6.41423e-06	0.0307303	GTEx/v8/Brain_Amygdala	NA	No	NA	0.04206	rs695110	41
ENSG00000137486	ARRB1	11	74975226	75062873	-1	protein_coding	408	ARRB1	0.986802	-0.498854	0	0	8	5.38751e-05	0.0390548	GTEx/v8/Artery_Aorta	NA	Yes	EP_correlation_cell_type_oneway:IMR90	5.429e-08	rs695110	41
ENSG00000158555	GDPD5	11	75145685	75236948	-1	protein_coding	81544	GDPD5	0.0699851	NA	0	0	141	2.3334e-15	0	eQTLGen_cis_eQTLs:eQTLGen_trans_eQTLs	NA	Yes	Mesenchymal_Stem_Cell	3.129e-09	rs695110;rs2285626;rs12979148;rs7249692	1 day, 17:59:00
ENSG00000149257	SERPINH1	11	75273101	75283828	1	protein_coding	871	SERPINH1	0.166551	-0.352985	0	0	86	3.019e-10	0	eQTLGen_cis_eQTLs:BIOSQTL/BIOS_eQTL_geneLevel	NA	No	NA	1.048e-08	rs695110	41
ENSG00000166391	MOGAT2	11	75428864	75444003	1	protein_coding	80168	MOGAT2	0.218649	0.716784	40	11.19	7	6.32497e-06	1.3234e-06	GTEx/v8/Liver	NA	Yes	Promoter_anchored_loops:Liver:GM12878:IMR90:Mesenchymal_Stem_Cell:Mesendoderm:Trophoblast-like_Cell:hESC	5.83e-09	rs695110	41
ENSG00000062282	DGAT2	11	75470557	75512579	1	protein_coding	84649	DGAT2	7.51043e-08	-0.634946	57	13.56	193	9.9947e-85	0	eQTLcatalogue/Lepik_2017_ge_blood:PsychENCODE_eQTLs:eQTLGen_cis_eQTLs:BIOSQTL/BIOS_eQTL_geneLevel:CMC_SVA_cis:GTEx/v8/Whole_Blood:GTEx/v8/Brain_Cortex:GTEx/v7/Whole_Blood:GTEx/v6/Whole_Blood	NA	No	NA	5.83e-09	rs695110	41
ENSG00000198382	UVRAG	11	75526212	75854239	1	protein_coding	7405	UVRAG	0.858603	-0.177213	159	18	243	9.4393e-59	0	eQTLcatalogue/BLUEPRINT_ge_monocyte:eQTLcatalogue/Fairfax_2014_IFN24:PsychENCODE_eQTLs:eQTLGen_cis_eQTLs:BIOSQTL/BIOS_eQTL_geneLevel:BRAINEAC/FCTX:BRAINEAC/aveALL:GTEx/v8/Artery_Aorta:GTEx/v8/Artery_Tibial:GTEx/v8/Brain_Nucleus_accumbens_basal_ganglia:GTEx/v8/Lung:GTEx/v8/Nerve_Tibial:GTEx/v8/Skin_Not_Sun_Exposed_Suprapubic:GTEx/v8/Skin_Sun_Exposed_Lower_leg:GTEx/v8/Testis:GTEx/v7/Adrenal_Gland:G…	NA	Yes	Promoter_anchored_loops:EP_correlation_cell_type_oneway:Left_Ventricle:GM12878:IMR90:Mesenchymal_Stem_Cell:Mesendoderm:Trophoblast-like_Cell:hESC	5.83e-09	rs695110	41
ENSG00000179240	RP11-111M22.2	11	76092357	76125663	1	protein_coding	101928749	NA	NA	NA	0	0	45	2.35549e-06	0.00595319	GTEx/v8/Esophagus_Muscularis:GTEx/v7/Esophagus_Muscularis:GTEx/v6/Esophagus_Muscularis	NA	Yes	Adult_Cortex:Fetal_Cortex:Left_Ventricle:GM12878:IMR90:Mesenchymal_Stem_Cell:Mesendoderm:Trophoblast-like_Cell:hESC	2.568e-08	rs695110	41
ENSG00000158636	C11orf30	11	76155967	76264069	1	protein_coding	56946	C11orf30	0.999997	-0.811741	0	0	21	7.86316e-06	0.0346029	eQTLcatalogue/CEDAR_T-cell_CD8:BRAINEAC/FCTX:BRAINEAC/aveALL	NA	Yes	Mesenchymal_Stem_Cell	5.83e-09	rs695110	41
ENSG00000150687	PRSS23	11	86502101	86663952	1	protein_coding	11098	PRSS23	1.26863e-06	-0.643504	0	0	8	3.3531e-13	0	eQTLGen_trans_eQTLs	NA	Yes	Mesenchymal_Stem_Cell:hESC	0.003258	rs3858704;rs6483414	1 day, 18:45:00
ENSG00000123892	RAB38	11	87846410	87908635	-1	protein_coding	23682	RAB38	0.00471762	0.74959	0	0	34	1.477e-07	0.000500657	eQTLGen_cis_eQTLs	NA	Yes	Aorta:Left_Ventricle:Liver:Ovary:GM12878:IMR90:Mesenchymal_Stem_Cell:Mesendoderm:Neural_Progenitor_Cell:Trophoblast-like_Cell:hESC	9.257e-09	rs6483414;rs7939942;rs6483414:rs7939942:rs6483414	42
ENSG00000109861	CTSC	11	88026760	88070955	-1	protein_coding	1075	CTSC	0.000816868	-0.0179911	0	0	309	9.3804e-65	0	eQTLcatalogue/CEDAR_neutrophil_CD15:eQTLcatalogue/Fairfax_2014_LPS24:eQTLcatalogue/Lepik_2017_ge_blood:eQTLGen_cis_eQTLs:BIOSQTL/BIOS_eQTL_geneLevel:GTEx/v8/Whole_Blood:GTEx/v8/Esophagus_Muscularis:GTEx/v8/Thyroid	NA	Yes	Aorta:Left_Ventricle:GM12878:IMR90:Mesenchymal_Stem_Cell:Mesendoderm:Trophoblast-like_Cell:hESC	9.257e-09	rs6483414;rs7939942	42
ENSG00000168959	GRM5	11	88237744	88799113	-1	protein_coding	2915	GRM5	0.985984	-0.290923	440	16.56	2	3.33995e-05	0.0448199	GTEx/v7/Testis	NA	Yes	Mesendoderm:hESC	9.257e-09	rs6483414;rs7939942	42
ENSG00000077498	TYR	11	88910620	89028927	1	protein_coding	7299	TYR	7.26381e-21	0.225785	2	10.78	0	NA	NA	NA	NA	Yes	Left_Ventricle:Liver:IMR90:Mesenchymal_Stem_Cell:Mesendoderm:Trophoblast-like_Cell:hESC	6.324e-05	rs7939942;rs6483414:rs7939942	42
ENSG00000168930	TRIM49	11	89530823	89541743	-1	protein_coding	57093	TRIM49	0.645523	-0.636835	0	0	2	2.62524e-06	0.0131262	eQTLcatalogue/CEDAR_transverse_colon	NA	Yes	Promoter_anchored_loops	6.473e-05	rs7939942	42
ENSG00000134640	MTNR1B	11	92702886	92718232	1	protein_coding	4544	MTNR1B	0.00870273	-0.165792	43	10.32	81	3.825e-14	3.08468e-12	TIGER/Nom_Alonso_Pancreatic_islets	NA	No	NA	4.119e-15	rs4331050;rs11020133	43
ENSG00000180773	SLC36A4	11	92877341	92931130	-1	protein_coding	120103	SLC36A4	2.69892e-09	0.458597	0	0	56	3.45917e-09	7.06096e-09	GTEx/v8/Esophagus_Mucosa:GTEx/v8/Esophagus_Muscularis:GTEx/v8/Skin_Not_Sun_Exposed_Suprapubic:GTEx/v8/Thyroid:GTEx/v7/Esophagus_Mucosa:GTEx/v6/Esophagus_Mucosa	NA	Yes	IMR90:Mesenchymal_Stem_Cell:Mesendoderm:hESC	4.119e-15	rs4331050;rs11020133;rs4331050:rs4331050;rs11020133:rs11020133	43
ENSG00000166002	SMCO4	11	93211638	93276674	-1	protein_coding	56935	SMCO4	0.00205705	-0.356948	0	0	9	6.6749e-06	8.69325e-16	eQTLGen_cis_eQTLs:GTEx/v8/Esophagus_Mucosa:GTEx/v8/Skin_Not_Sun_Exposed_Suprapubic	NA	Yes	Mesenchymal_Stem_Cell:Mesendoderm	9.76e-08	rs4331050;rs11020133;rs4331050:rs4331050	43
ENSG00000137752	CASP1	11	104896170	104972158	-1	protein_coding	834	CASP1	0.136798	1.15479	0	0	7	2.5855e-07	0.00251274	eQTLGen_trans_eQTLs	NA	No	NA	0.003258	rs3858704	45
ENSG00000149294	NCAM1	11	112831997	113149158	1	protein_coding	4684	NCAM1	NA	NA	0	0	7	1.6914e-07	0.0016819	eQTLGen_trans_eQTLs	NA	No	NA	0.01301	rs3858704	45
ENSG00000137656	BUD13	11	116618886	116643704	-1	protein_coding	84811	BUD13	0.00229543	NA	127	20.2	560	3.2331e-74	0	TIGER/Nom_Alonso_Pancreatic_islets:eQTLcatalogue/Fairfax_2014_LPS24:eQTLcatalogue/Fairfax_2014_naive:eQTLGen_cis_eQTLs:BIOSQTL/BIOS_eQTL_geneLevel:BRAINEAC/FCTX:BRAINEAC/aveALL:GTEx/v8/Whole_Blood:GTEx/v7/Whole_Blood:GTEx/v6/Whole_Blood	NA	Yes	Promoter_anchored_loops:Adult_Cortex:Fetal_Cortex:Aorta:Hippocampus:Left_Ventricle:Liver:Pancreas:Right_Ventricle:Spleen:GM12878:IMR90:Mesenchymal_Stem_Cell:Mesendoderm:Trophoblast-like_Cell:hESC	1.08e-119	rs180326;rs567312;rs1263056;rs61905084;rs61905078;rs651821;rs10892023;rs11604424;rs17440824;rs180360;rs623908;rs185672288;rs3741297;rs139524394;rs9804646;rs138869088;rs79538491;rs193076783;rs185070451;rs116987336;rs7101528;rs145914258;rs75310100;rs11216162;rs4938362;rs10892001;rs3016352;rs1261672;rs11820504;rs111255936;rs74328581;rs11216118;rs236916;rs7101528:rs74328581;rs4938362:rs111255936;rs49…	44
ENSG00000109917	ZNF259	11	116648436	116658766	-1	protein_coding	8882	ZNF259	0.0193035	0.00239464	78	23.3	187	3.7696e-25	0	EyeGEx:PsychENCODE_eQTLs:eQTLGen_cis_eQTLs:BIOSQTL/BIOS_eQTL_geneLevel:CMC_SVA_cis:CMC_NoSVA_cis:GTEx/v8/Adipose_Subcutaneous:GTEx/v8/Whole_Blood:GTEx/v8/Brain_Anterior_cingulate_cortex_BA24:GTEx/v8/Brain_Caudate_basal_ganglia:GTEx/v8/Brain_Cerebellar_Hemisphere:GTEx/v8/Brain_Cerebellum:GTEx/v8/Brain_Cortex:GTEx/v8/Brain_Hippocampus:GTEx/v8/Brain_Nucleus_accumbens_basal_ganglia:GTEx/v8/Brain_Puta…	NA	Yes	EP_links_oneway:Promoter_anchored_loops:Adult_Cortex:Fetal_Cortex:Aorta:Hippocampus:Left_Ventricle:Liver:Pancreas:Right_Ventricle:Spleen:GM12878:IMR90:Mesenchymal_Stem_Cell:Mesendoderm:Trophoblast-like_Cell:hESC	8.45e-131	rs17440824;rs651821;rs10892023;rs11604424;rs61905084;rs623908;rs180360;rs9804646;rs1263056;rs180326;rs185070451;rs61905078;rs116987336;rs139524394;rs3741297;rs7101528;rs567312;rs145914258;rs151139277;rs11820504;rs185672288;rs111255936;rs74328581;rs11216162;rs4938362;rs11216118;rs141351422;rs1261672;rs236916;rs4938362:rs80220270;rs11216162:rs567312;rs236916:rs236916;rs4938362:rs185672288:rs7101528…	44
ENSG00000110243	APOA5	11	116660083	116663136	-1	protein_coding	116519	APOA5	1.37735e-06	0.42373	59	23.3	1	7.29e-09	5.87903e-07	TIGER/Nom_Alonso_Pancreatic_islets	NA	Yes	Promoter_anchored_loops:Aorta:Hippocampus:Left_Ventricle:Liver:Pancreas:Right_Ventricle:Spleen:GM12878:IMR90:Mesenchymal_Stem_Cell:Mesendoderm:Trophoblast-like_Cell:hESC	8.45e-131	rs180326;rs61905078;rs7101528;rs3741297;rs61905084;rs623908;rs9804646;rs11604424;rs651821;rs10892023;rs17440824;rs180360;rs567312;rs1263056;rs145914258;rs151139277;rs80220270:rs7101528:rs567312:rs111255936:rs567312;rs7101528:rs236916:rs145914258:rs111255936;rs11216162:rs80220270;rs11216162:rs567312;rs11216162;rs4938362:rs111255936;rs74328581;rs4938362:rs141351422:rs11216162;rs4938362:rs74328581;r…	44
ENSG00000110244	APOA4	11	116691419	116694022	-1	protein_coding	337	APOA4	3.57595e-05	0.0816551	37	13.25	6	1.51804e-11	6.40943e-08	GTEx/v8/Heart_Atrial_Appendage:GTEx/v8/Muscle_Skeletal:GTEx/v7/Heart_Atrial_Appendage:GTEx/v7/Muscle_Skeletal:GTEx/v6/Heart_Left_Ventricle	NA	Yes	Promoter_anchored_loops:Liver:Spleen:IMR90:Mesenchymal_Stem_Cell:Mesendoderm	1.5e-17	rs80220270;rs79538491;rs567312;rs7101528;rs236916;rs74328581;rs139524394;rs116987336;rs111255936;rs567312:rs111255936:rs111255936;rs11216162;rs4938362:rs7101528:rs145914258:rs567312;rs236916:rs111255936;rs11216162:rs567312;rs7101528:rs567312;rs4938362:rs80220270;rs11216162:rs236916:rs567312;rs4938362:rs141351422:rs11216162;rs4938362:rs74328581;rs4938362:rs80220270:rs567312;rs11216162:rs11216162:r…	44
ENSG00000110245	APOC3	11	116700422	116703788	1	protein_coding	345	APOC3	0.000678026	0.121255	49	13.25	1	4.5197e-06	0.0085272	GTEx/v7/Testis	NA	Yes	Promoter_anchored_loops:Liver:Spleen:IMR90:Mesenchymal_Stem_Cell:Mesendoderm	8.45e-131	rs74328581;rs139524394;rs567312;rs236916;rs80220270;rs7101528;rs116987336;rs111255936;rs145914258;rs11216162;rs4938362;rs651821;rs10892023;rs11604424:rs623908;rs180360:rs3741297:rs180326;rs180360:rs61905078:rs61905078;rs17440824:rs651821:rs17440824:rs651821;rs10892023:rs61905084;rs9804646;rs10892023:rs180326;rs1263056:rs11604424:rs9804646:rs151139277:rs7101528:rs180360:rs10892023:rs80220270;rs112…	44
ENSG00000118137	APOA1	11	116706467	116708666	-1	protein_coding	335	APOA1	0.0487384	0.161101	55	17.57	551	2.81438e-35	0	TIGER/Nom_Alonso_Pancreatic_islets:eQTLcatalogue/Quach_2016_ge_monocyte_LPS:eQTLcatalogue/Quach_2016_ge_monocyte_naive:eQTLcatalogue/Quach_2016_ge_monocyte_Pam3CSK4:eQTLcatalogue/Quach_2016_ge_monocyte_R848:BIOSQTL/BIOS_eQTL_geneLevel:GTEx/v8/Heart_Atrial_Appendage:GTEx/v8/Heart_Left_Ventricle:GTEx/v8/Muscle_Skeletal:GTEx/v8/Nerve_Tibial:GTEx/v8/Stomach:GTEx/v8/Testis:GTEx/v7/Heart_Atrial_Appenda…	NA	Yes	Promoter_anchored_loops:Liver:Spleen:IMR90:Mesenchymal_Stem_Cell:Mesendoderm	8.45e-131	rs7101528;rs116987336;rs80220270;rs567312;rs111255936;rs236916;rs145914258;rs11216162;rs74328581;rs4938362;rs61905078;rs17440824;rs180326;rs11604424;rs623908;rs9804646;rs61905084;rs79538491;rs10892023;rs651821;rs11604424:rs623908;rs180360:rs3741297:rs180326;rs180360:rs61905078:rs61905078;rs17440824:rs651821:rs17440824:rs651821;rs10892023:rs61905084;rs10892023:rs180326;rs1263056:rs11604424:rs98046…	44
ENSG00000160584	SIK3	11	116714118	116969153	-1	protein_coding	23387	SIK3	0.999883	0.278236	611	23	592	1.3084e-15	0	TIGER/Nom_Alonso_Pancreatic_islets:eQTLcatalogue/Alasoo_2018_ge_macrophage_naive:eQTLcatalogue/BLUEPRINT_ge_monocyte:eQTLcatalogue/CEDAR_neutrophil_CD15:eQTLcatalogue/Fairfax_2014_naive:eQTLcatalogue/GEUVADIS_ge_LCL:DICE/T_CD8_naive:DICE/Monocyte_classical:eQTLGen_cis_eQTLs:BIOSQTL/BIOS_eQTL_geneLevel:GTEx/v8/Adipose_Visceral_Omentum:GTEx/v8/Esophagus_Mucosa:GTEx/v8/Heart_Left_Ventricle:GTEx/v8/N…	NA	Yes	EP_links_oneway:Promoter_anchored_loops:Adult_Cortex:Fetal_Cortex:Aorta:Dorsolateral_Prefrontal_Cortex:Hippocampus:Left_Ventricle:Liver:Pancreas:Right_Ventricle:Spleen:GM12878:IMR90:Mesenchymal_Stem_Cell:Mesendoderm:Neural_Progenitor_Cell:Trophoblast-like_Cell:hESC	8.45e-131	rs7101528;rs145914258;rs111255936;rs11216162;rs236916;rs567312;rs74328581;rs4938362;rs80220270;rs185070451;rs151139277;rs141351422;rs190231637;rs117091722;rs138869088;rs201535154;rs79538491;rs116987336;rs139524394;rs185672288;rs193076783;rs61905084;rs623908;rs9804646;rs61905078;rs10892023;rs11820504;rs117091722:rs567312:rs7101528:rs236916:rs74328581:rs141351422:rs651821;rs11604424:rs623908;rs1803…	44
ENSG00000168092	PAFAH1B2	11	117014983	117047610	1	protein_coding	5049	PAFAH1B2	0.962029	3.35677	99	21.7	745	2.3516e-190	0	TIGER/Nom_Alonso_Pancreatic_islets:EyeGEx:eQTLcatalogue/Alasoo_2018_ge_macrophage_Salmonella:eQTLcatalogue/BLUEPRINT_ge_monocyte:eQTLcatalogue/BLUEPRINT_ge_neutrophil:eQTLcatalogue/BLUEPRINT_ge_T-cell:eQTLcatalogue/Fairfax_2014_IFN24:eQTLcatalogue/Fairfax_2014_LPS2:eQTLcatalogue/Kasela_2017_T-cell_CD8:eQTLcatalogue/Lepik_2017_ge_blood:eQTLcatalogue/Quach_2016_ge_monocyte_IAV:eQTLcatalogue/Quach_2…	NA	Yes	Promoter_anchored_loops:Adult_Cortex:Fetal_Cortex:Left_Ventricle:Liver:GM12878:IMR90:Mesenchymal_Stem_Cell:Mesendoderm:Trophoblast-like_Cell:hESC	8.45e-131	rs80220270;rs567312;rs236916;rs7101528;rs79538491;rs74328581;rs4938362;rs141351422;rs190231637;rs117091722;rs145914258;rs185070451;rs11216162;rs111255936;rs10892023;rs61905078;rs17440824;rs180326;rs11604424;rs11216118;rs10892001;rs3016352;rs11820504;rs651821;rs1263056;rs180360;rs61905084;rs623908;rs185672288;rs9804646;rs116987336;rs139524394;rs61905078:rs7101528:rs3741297:rs61905084;rs9804646:rs1…	44
ENSG00000149577	SIDT2	11	117049449	117068160	1	protein_coding	51092	SIDT2	0.0025724	-0.315318	65	14.46	975	3.27167000000001e-310	0	TIGER/Nom_Alonso_Pancreatic_islets:EyeGEx:eQTLcatalogue/BLUEPRINT_ge_monocyte:eQTLcatalogue/BLUEPRINT_ge_T-cell:eQTLcatalogue/CEDAR_monocyte_CD14:eQTLcatalogue/CEDAR_T-cell_CD4:eQTLcatalogue/Fairfax_2012_B-cell_CD19:eQTLcatalogue/Fairfax_2014_IFN24:eQTLcatalogue/Fairfax_2014_LPS24:eQTLcatalogue/Fairfax_2014_LPS2:eQTLcatalogue/Fairfax_2014_naive:eQTLcatalogue/GENCORD_ge_LCL:eQTLcatalogue/Kasela_20…	NA	Yes	EP_correlation_organ_oneway:Adult_Cortex:Fetal_Cortex:Left_Ventricle:Liver:Spleen:GM12878:IMR90:Mesenchymal_Stem_Cell:Mesendoderm:Trophoblast-like_Cell:hESC	8.45e-131	rs567312;rs236916;rs80220270;rs74328581;rs11216162;rs4938362;rs141351422;rs7101528;rs151139277;rs10892023;rs111255936;rs1263056;rs651821;rs11216118;rs11604424;rs180326;rs623908;rs116987336;rs139524394;rs145914258;rs79538491;rs61905084;rs3016352;rs1261672;rs11820504;rs180360;rs75310100;rs61905078;rs17440824;rs9804646;rs117091722;rs138869088;rs236916:rs623908:rs623908;rs9804646:rs651821;rs11604424:…	44
ENSG00000149591	TAGLN	11	117070037	117075498	1	protein_coding	6876	TAGLN	0.241538	-0.64579	53	16.39	952	3.27167000000001e-310	0	EyeGEx:eQTLcatalogue/BLUEPRINT_ge_monocyte:eQTLcatalogue/BLUEPRINT_ge_neutrophil:eQTLcatalogue/BLUEPRINT_ge_T-cell:eQTLcatalogue/CEDAR_B-cell_CD19:eQTLcatalogue/CEDAR_monocyte_CD14:eQTLcatalogue/Fairfax_2012_B-cell_CD19:eQTLcatalogue/Fairfax_2014_IFN24:eQTLcatalogue/Fairfax_2014_LPS24:eQTLcatalogue/Fairfax_2014_LPS2:eQTLcatalogue/Fairfax_2014_naive:eQTLcatalogue/GENCORD_ge_LCL:eQTLcatalogue/GENCO…	NA	Yes	EP_links_oneway:Promoter_anchored_loops:Adult_Cortex:Left_Ventricle:Liver:Spleen:GM12878:IMR90:Mesenchymal_Stem_Cell:Mesendoderm:Trophoblast-like_Cell:hESC	8.45e-131	rs80220270;rs236916;rs7101528;rs74328581;rs4938362;rs567312;rs151139277;rs190231637;rs10892023;rs61905084;rs9804646;rs116987336;rs139524394;rs11216162;rs145914258;rs1263056;rs651821;rs11216118;rs11604424;rs180326;rs623908;rs79538491;rs111255936;rs3016352;rs180360;rs75310100;rs1261672;rs11820504;rs61905078;rs17440824;rs117091722;rs141351422;rs138869088;rs7101528:rs623908:rs623908;rs9804646:rs65182…	44
ENSG00000160613	PCSK7	11	117075053	117103241	-1	protein_coding	9159	PCSK7	0.19137	NA	79	18.5	802	3.27170000000001e-310	0	TIGER/Nom_Alonso_Pancreatic_islets:EyeGEx:eQTLcatalogue/BLUEPRINT_ge_monocyte:eQTLcatalogue/BLUEPRINT_ge_T-cell:eQTLcatalogue/CEDAR_monocyte_CD14:eQTLcatalogue/CEDAR_T-cell_CD4:eQTLcatalogue/CEDAR_T-cell_CD8:eQTLcatalogue/CEDAR_transverse_colon:eQTLcatalogue/Fairfax_2014_IFN24:eQTLcatalogue/Fairfax_2014_LPS24:eQTLcatalogue/Fairfax_2014_LPS2:eQTLcatalogue/Lepik_2017_ge_blood:eQTLcatalogue/Quach_20…	NA	Yes	Promoter_anchored_loops:EP_correlation_cell_type_oneway:Spleen:IMR90:Mesenchymal_Stem_Cell:Mesendoderm:Trophoblast-like_Cell:hESC	8.45e-131	rs80220270;rs567312;rs236916;rs74328581;rs4938362;rs7101528;rs151139277;rs190231637;rs141351422;rs185672288;rs185070451;rs138869088;rs10892023;rs1263056;rs11604424;rs11216162;rs651821;rs145914258;rs111255936;rs10892001;rs3016352;rs1261672;rs11820504;rs180360;rs61905084;rs180326;rs75310100;rs61905078;rs11216118;rs9804646;rs623908;rs116987336;rs139524394;rs117091722;rs79538491;rs10892023:rs567312:r…	44
ENSG00000167257	RNF214	11	117103341	117157161	1	protein_coding	257160	RNF214	0.830018	NA	26	31	143	1.27612e-31	0	EyeGEx:eQTLcatalogue/BLUEPRINT_ge_monocyte:eQTLcatalogue/BLUEPRINT_ge_T-cell:eQTLcatalogue/TwinsUK_ge_skin:PsychENCODE_eQTLs:DICE/T_CD4_naive:DICE/T_CD8_naive:DICE/Monocyte_non_classical:DICE/T_CD4_naive_TREG:eQTLGen_cis_eQTLs:BIOSQTL/BIOS_eQTL_geneLevel:GTEx/v8/Adipose_Subcutaneous:GTEx/v8/Whole_Blood:GTEx/v8/Artery_Aorta:GTEx/v8/Artery_Tibial:GTEx/v8/Colon_Transverse:GTEx/v8/Nerve_Tibial:GTEx/v…	NA	Yes	Promoter_anchored_loops:EP_correlation_cell_type_oneway:Spleen:IMR90:Mesenchymal_Stem_Cell:Mesendoderm:Trophoblast-like_Cell:hESC	8.45e-131	rs4938362;rs138869088;rs567312;rs80220270;rs141351422;rs7101528;rs151139277;rs236916;rs623908;rs180326;rs1263056;rs11604424;rs145914258;rs11216162;rs10892023:rs567312:rs80220270:rs79538491:rs7101528:rs236916:rs151139277:rs116987336;rs139524394:rs111255936;rs74328581;rs4938362:rs80220270;rs11216162:rs567312;rs4938362:rs141351422:rs11216162;rs4938362:rs74328581;rs4938362:rs567312;rs11216162:rs11216…	44
ENSG00000186318	BACE1	11	117156402	117186975	-1	protein_coding	23621	BACE1	0.944279	-0.91909	10	31	33	9.1337e-33	0	EyeGEx:eQTLcatalogue/GENCORD_ge_fibroblast:PsychENCODE_eQTLs:eQTLGen_cis_eQTLs:BIOSQTL/BIOS_eQTL_geneLevel:CMC_SVA_cis:GTEx/v8/Adrenal_Gland:GTEx/v8/Whole_Blood:GTEx/v8/Testis:GTEx/v7/Cells_Transformed_fibroblasts:GTEx/v7/Testis:GTEx/v6/Testis	NA	Yes	EP_correlation_organ_oneway:Adult_Cortex:Fetal_Cortex:IMR90:Mesenchymal_Stem_Cell	8.45e-131	rs141351422;rs138869088;rs151139277;rs116987336;rs139524394;rs185672288;rs190231637;rs567312;rs11820504;rs3016352;rs111255936;rs74328581;rs11216162;rs4938362;rs75310100;rs236916;rs145914258;rs180360;rs1261672;rs236916:rs74328581;rs4938362:rs236916:rs4938362:rs141351422:rs567312:rs80220270:rs190231637:rs74328581;rs4938362:rs74328581:rs151139277:rs138869088:rs623908:rs623908;rs9804646:rs651821;rs10…	44
ENSG00000110274	CEP164	11	117185273	117283984	1	protein_coding	22897	CEP164	9.66879e-18	0.753352	9	17.44	10	4.6275e-18	0	PsychENCODE_eQTLs:eQTLGen_cis_eQTLs:BIOSQTL/BIOS_eQTL_geneLevel:CMC_SVA_cis:GTEx/v8/Brain_Cerebellum	NA	Yes	Adult_Cortex:Fetal_Cortex:IMR90:Mesenchymal_Stem_Cell	8.45e-131	rs116987336;rs185672288;rs151139277;rs138869088;rs567312;rs75310100;rs11216162;rs74328581;rs4938362:rs236916:rs567312;rs236916:rs4938362:rs141351422:rs567312:rs80220270:rs190231637:rs74328581;rs4938362:rs74328581:rs151139277:rs138869088:rs623908:rs623908;rs9804646:rs651821;rs10892023;rs11604424:rs623908;rs1263056:rs17440824:rs623908;rs180326;rs1263056:rs185070451:rs623908;rs10892023:rs623908;rs98…	44
ENSG00000177103	DSCAML1	11	117298489	117688240	-1	protein_coding	57453	DSCAML1	0.999999	NA	12	18.71	3	0.000133731	1.45871e-10	GTEx/v8/Artery_Tibial:GTEx/v8/Esophagus_Muscularis	NA	Yes	Promoter_anchored_loops:Adult_Cortex:Fetal_Cortex:Left_Ventricle:Liver:IMR90:Mesendoderm:Trophoblast-like_Cell:hESC	0.03912	rs151139277;rs185070451;rs138869088;rs567312;rs74328581;rs141351422;rs151139277:rs185070451:rs141351422	44
ENSG00000137731	FXYD2	11	117671559	117699413	-1	protein_coding	486	FXYD2	0.698944	0.363766	0	0	1	0.0004116	0.0331935	TIGER/Nom_Alonso_Pancreatic_islets	NA	Yes	Promoter_anchored_loops:Adult_Cortex:Fetal_Cortex:Left_Ventricle:Liver:IMR90:Mesendoderm:Trophoblast-like_Cell:hESC	NA	rs139524394;rs151139277:rs185070451:rs141351422	44
ENSG00000137726	FXYD6	11	117707693	117748201	-1	protein_coding	100533181	FXYD6	0.829814	-0.750643	0	0	12	1.1762e-06	0.00354458	eQTLGen_cis_eQTLs:GTEx/v7/Esophagus_Mucosa	NA	Yes	Mesenchymal_Stem_Cell:Mesendoderm:Trophoblast-like_Cell:hESC	5.251e-10	rs567312;rs236916;rs7101528;rs141351422:rs151139277:rs185070451	44
ENSG00000137747	TMPRSS13	11	117771358	117800174	-1	protein_coding	84000	TMPRSS13	6.08623e-05	2.05302	1	0.138	2	6.97972e-05	0.000812404	GTEx/v8/Lung	NA	Yes	Promoter_anchored_loops:Left_Ventricle:GM12878:IMR90:Mesenchymal_Stem_Cell:Mesendoderm:Neural_Progenitor_Cell:Trophoblast-like_Cell:hESC	2.167e-09	rs141351422;rs236916;rs138869088:rs151139277:rs185070451:rs141351422	44
ENSG00000110324	IL10RA	11	117857063	117872196	1	protein_coding	3587	IL10RA	0.968346	-0.921352	0	0	1	2.3958e-06	0.0177815	eQTLGen_trans_eQTLs	NA	Yes	Left_Ventricle:Liver:Right_Ventricle:GM12878:IMR90:Mesenchymal_Stem_Cell:Mesendoderm:Trophoblast-like_Cell:hESC	1.65e-11	rs7249692;rs151139277:rs185070451:rs10892001:rs201535154:rs3016352:rs1261672:rs145914258:rs193076783:rs1261672;rs3016352:rs141351422:rs138869088	1 day, 20:59:00
ENSG00000137648	TMPRSS4	11	117947753	117992605	1	protein_coding	56649	TMPRSS4	1.19754e-08	0.384952	0	0	15	3.9148e-06	6.89535e-11	GTEx/v8/Skin_Sun_Exposed_Lower_leg	NA	Yes	Promoter_anchored_loops:Left_Ventricle:Liver:GM12878:IMR90:Mesenchymal_Stem_Cell:Mesendoderm:Trophoblast-like_Cell:hESC	5.947e-74	rs74328581;rs4938362;rs11216162;rs236916;rs138869088:rs151139277:rs185070451:rs141351422:rs10892001:rs201535154:rs3016352:rs1261672:rs145914258:rs193076783:rs1261672;rs3016352:rs180326;rs1263056;rs3016352:rs1263056;rs3016352:rs17440824:rs180326;rs1263056:rs180326;rs11820504;rs3016352:rs180360:rs1263056:rs1263056;rs75310100;rs3016352:rs61905084;rs10892023:rs11216118:rs180360;rs1261672:rs61905078:r…	44
ENSG00000177098	SCN4B	11	118004092	118023603	-1	protein_coding	6330	SCN4B	0.00153523	-0.49413	0	0	32	1.58098e-06	0.00106484	TIGER/Nom_Alonso_Pancreatic_islets:GTEx/v8/Colon_Transverse	NA	Yes	IMR90:Mesenchymal_Stem_Cell	2.353e-14	rs80220270;rs74328581;rs4938362;rs11216162;rs151139277:rs185070451	44
ENSG00000149575	SCN2B	11	118032666	118047388	-1	protein_coding	6327	SCN2B	0.133477	4.70964	0	0	14	6.50601e-05	0.0158464	BRAINEAC/MEDU	NA	Yes	IMR90	1.257e-05	rs80220270;rs151139277:rs185070451	44
ENSG00000160593	AMICA1	11	118064455	118095809	-1	protein_coding	120425	AMICA1	0.00405909	0.46209	0	0	10	1.1048e-08	0.000177305	eQTLGen_trans_eQTLs	NA	Yes	Mesenchymal_Stem_Cell	3.129e-09	rs3858704;rs2285626;rs12979148;rs7249692;rs58434384;rs151139277:rs185070451	1 day, 20:45:59
ENSG00000160683	CXCR5	11	118754475	118768508	1	protein_coding	643	CXCR5	0.160254	-0.86613	0	0	6	3.2687e-08	0.000421144	eQTLGen_trans_eQTLs	NA	No	NA	0.003258	rs3858704	45
ENSG00000149328	GLB1L2	11	134201768	134248235	1	protein_coding	89944	GLB1L2	1.44692e-16	0.183323	0	0	8	1.8755e-11	0	eQTLGen_trans_eQTLs	NA	No	NA	0.003258	rs3858704	45
ENSG00000118971	CCND2	12	4382938	4414516	1	protein_coding	894	CCND2	0.949001	-1.76461	0	0	8	1.1703e-08	0.000175579	eQTLGen_trans_eQTLs	NA	No	NA	0.003258	rs3858704	45
ENSG00000139192	TAPBPL	12	6560856	6575683	1	protein_coding	55080	TAPBPL	3.28514e-07	0.220309	0	0	6	1.4737e-08	0.000188917	eQTLGen_trans_eQTLs	NA	No	NA	NA	rs3858704	45
ENSG00000089692	LAG3	12	6881678	6887621	1	protein_coding	3902	LAG3	0.109617	-0.223326	0	0	6	2.4358e-08	0.00033038	eQTLGen_trans_eQTLs	NA	No	NA	NA	rs3858704	45
ENSG00000250510	GPR162	12	6930711	6939136	1	protein_coding	27239	GPR162	0.0171344	NA	0	0	6	8.9349e-09	0.000164582	eQTLGen_trans_eQTLs	NA	No	NA	NA	rs3858704	45
ENSG00000111669	TPI1	12	6976283	6980112	1	protein_coding	7167	TPI1	0.581367	0.0860457	0	0	1	8.2574e-06	0.0496423	eQTLGen_trans_eQTLs	NA	No	NA	1.026e-13	rs4665963;rs780095	9
ENSG00000111729	CLEC4A	12	8276228	8291203	1	protein_coding	50856	CLEC4A	7.43753e-07	0.863439	0	0	1	5.5092e-06	0.0356692	eQTLGen_trans_eQTLs	NA	No	NA	NA	rs3803300	48
ENSG00000111796	KLRB1	12	9747147	9760482	-1	protein_coding	3820	KLRB1	4.43125e-06	1.09034	0	0	6	1.9048e-07	0.00190808	eQTLGen_trans_eQTLs	NA	No	NA	NA	rs3858704	45
ENSG00000110848	CD69	12	9905082	9913497	-1	protein_coding	969	CD69	0.0188834	0.760407	0	0	3	4.8819e-06	0.0323501	eQTLGen_trans_eQTLs	NA	No	NA	NA	rs3858704	45
ENSG00000139112	GABARAPL1	12	10365057	10375727	1	protein_coding	23710	GABARAPL1	0.782335	-0.0300026	0	0	4	2.5857e-08	0.000358423	eQTLGen_trans_eQTLs	NA	No	NA	NA	rs3858704	45
ENSG00000183150	GPR19	12	12813825	12849141	-1	protein_coding	2842	GPR19	0.34859	-0.214831	0	0	1	4.7935e-07	0.00424301	eQTLGen_trans_eQTLs	NA	No	NA	NA	rs3858704	45
ENSG00000134531	EMP1	12	13349650	13369708	1	protein_coding	2012	EMP1	0.411004	-0.318537	0	0	10	5.3108e-17	0	eQTLGen_trans_eQTLs	NA	No	NA	1.599e-13	rs2245019;rs3858704	1 day, 4:45:00
ENSG00000171681	ATF7IP	12	14518610	14651697	1	protein_coding	55729	ATF7IP	0.999741	-0.642882	0	0	5	1.0728e-06	0.00866398	eQTLGen_trans_eQTLs	NA	No	NA	NA	rs3858704	45
ENSG00000111716	LDHB	12	21788276	21910791	-1	protein_coding	3945	LDHB	2.0275e-05	0.592299	0	0	8	1.6785e-10	0	eQTLGen_trans_eQTLs	NA	No	NA	0.003258	rs3858704	45
ENSG00000133703	KRAS	12	25357723	25403870	-1	protein_coding	3845	KRAS	0.00106119	NA	0	0	8	3.2828e-10	2.16497e-05	eQTLGen_trans_eQTLs	NA	No	NA	0.003258	rs3858704	45
ENSG00000064763	FAR2	12	29302036	29493913	1	protein_coding	55711	FAR2	0.922174	0.39598	0	0	8	8.0195e-14	0	eQTLGen_trans_eQTLs	NA	No	NA	0.003258	rs3858704	45
ENSG00000110900	TSPAN11	12	31079362	31149534	1	protein_coding	441631	TSPAN11	2.95983e-05	2.17675	0	0	14	NA	0.009	CMC_SVA_trans:CMC_NoSVA_cis:CMC_NoSVA_trans	NA	No	NA	0.006145	rs55931203	54
ENSG00000184613	NELL2	12	44902058	45315631	-1	protein_coding	4753	NELL2	0.999854	-0.422219	0	0	4	2.4675e-06	0.0182177	eQTLGen_trans_eQTLs	NA	No	NA	NA	rs3858704	45
ENSG00000179715	PCED1B	12	47473386	47630443	1	protein_coding	91523	PCED1B	0.00826613	-0.701179	0	0	4	1.666e-07	0.00164996	eQTLGen_trans_eQTLs	NA	No	NA	NA	rs3858704	45
ENSG00000134291	TMEM106C	12	48357352	48362661	1	protein_coding	79022	TMEM106C	3.96021e-06	-0.75652	0	0	3	2.754e-08	0.000385585	eQTLGen_trans_eQTLs	NA	No	NA	1.65e-11	rs2285626;rs12979148;rs7249692	59
ENSG00000167552	TUBA1A	12	49578579	49583107	-1	protein_coding	7846	TUBA1A	0.836536	-0.472903	0	0	4	3.301e-07	0.0030157	eQTLGen_trans_eQTLs	NA	No	NA	NA	rs3858704	45
ENSG00000139644	TMBIM6	12	50101508	50158717	1	protein_coding	7009	TMBIM6	0.0161697	-0.476462	0	0	1	7.8146e-06	0.0475279	eQTLGen_trans_eQTLs	NA	No	NA	0.01301	rs3858704	45
ENSG00000161638	ITGA5	12	54789045	54813244	-1	protein_coding	3678	ITGA5	0.999798	-0.832049	0	0	8	2.9638e-21	0	eQTLGen_trans_eQTLs	NA	No	NA	0.003258	rs3858704	45
ENSG00000135426	TESPA1	12	55341802	55378530	-1	protein_coding	9840	TESPA1	1.91516e-05	1.27595	0	0	6	1.952e-08	0.000245549	eQTLGen_trans_eQTLs	NA	No	NA	NA	rs3858704	45
ENSG00000070961	ATP2B1	12	89981828	90103077	-1	protein_coding	490	ATP2B1	0.999998	-1.81744	0	0	8	8.649e-23	0	eQTLGen_trans_eQTLs	NA	No	NA	0.003258	rs3858704	45
ENSG00000235162	C12orf75	12	105629068	105789875	1	protein_coding	387882	C12orf75	NA	-0.0224105	0	0	10	1.0781e-09	3.93546e-05	eQTLGen_trans_eQTLs	NA	No	NA	0.003258	rs3858704	45
ENSG00000074590	NUAK1	12	106457118	106533811	-1	protein_coding	9891	NUAK1	0.18903	0.541314	0	0	6	1.5971e-07	0.00162043	eQTLGen_trans_eQTLs	NA	No	NA	0.003258	rs3858704	45
ENSG00000166046	TCP11L2	12	106695707	106740793	1	protein_coding	255394	TCP11L2	7.48809e-07	0.842388	0	0	7	2.4953e-08	0.000329588	eQTLGen_trans_eQTLs	NA	No	NA	0.003258	rs3858704	45
ENSG00000183160	TMEM119	12	108983622	108992096	-1	protein_coding	338773	TMEM119	0.00956737	1.16681	0	0	1	NA	0.049	CMC_SVA_cis	NA	No	NA	0.005159	rs7313797	45
ENSG00000189046	ALKBH2	12	109525996	109531436	-1	protein_coding	121642	ALKBH2	0.000816686	-0.248282	0	0	6	6.81252e-05	1.9855e-08	GTEx/v8/Skin_Sun_Exposed_Lower_leg	NA	Yes	IMR90:Mesenchymal_Stem_Cell:Mesendoderm:hESC	7.059e-12	rs7313797;rs7313797:rs117121174	45
ENSG00000076248	UNG	12	109535379	109548797	1	protein_coding	7374	UNG	0.0465812	-1.04807	0	0	143	7.22363e-41	1.37521e-34	eQTLcatalogue/TwinsUK_ge_skin:eQTLGen_cis_eQTLs:GTEx/v8/Cells_Cultured_fibroblasts:GTEx/v8/Skin_Not_Sun_Exposed_Suprapubic:GTEx/v8/Skin_Sun_Exposed_Lower_leg:GTEx/v7/Skin_Not_Sun_Exposed_Suprapubic:GTEx/v7/Skin_Sun_Exposed_Lower_leg:GTEx/v6/Skin_Not_Sun_Exposed_Suprapubic:GTEx/v6/Skin_Sun_Exposed_Lower_leg	NA	Yes	IMR90:Mesenchymal_Stem_Cell:Mesendoderm:hESC	7.059e-12	rs7313797;rs4766638;rs7313797:rs117121174	45
ENSG00000076555	ACACB	12	109554400	109706031	1	protein_coding	32	ACACB	5.12433e-22	0.136953	1	2.038	131	2.0976e-35	0	eQTLcatalogue/TwinsUK_ge_skin:eQTLGen_cis_eQTLs:GTEx/v8/Cells_Cultured_fibroblasts:GTEx/v8/Skin_Not_Sun_Exposed_Suprapubic:GTEx/v7/Skin_Not_Sun_Exposed_Suprapubic:GTEx/v7/Testis	NA	Yes	Promoter_anchored_loops:IMR90:Mesenchymal_Stem_Cell:Mesendoderm:hESC	7.059e-12	rs117121174;rs7313797;rs4766638;rs7313797:rs117121174	45
ENSG00000139445	FOXN4	12	109715784	109747025	-1	protein_coding	121643	FOXN4	0.133061	-0.465357	6	1.85	145	1.56024e-72	1.78103e-62	EyeGEx:GTEx/v8/Adipose_Visceral_Omentum:GTEx/v8/Muscle_Skeletal:GTEx/v8/Skin_Not_Sun_Exposed_Suprapubic:GTEx/v8/Skin_Sun_Exposed_Lower_leg:GTEx/v7/Skin_Not_Sun_Exposed_Suprapubic:GTEx/v7/Skin_Sun_Exposed_Lower_leg:GTEx/v6/Skin_Not_Sun_Exposed_Suprapubic:GTEx/v6/Skin_Sun_Exposed_Lower_leg	NA	Yes	Fetal_Cortex:IMR90:Mesendoderm:Trophoblast-like_Cell:hESC	3.04e-18	rs117121174;rs7313797;rs7313797:rs117121174:rs12828640:rs3858704:rs11066015;rs11065836	45
ENSG00000174527	MYO1H	12	109785708	109893328	1	protein_coding	283446	MYO1H	2.91611e-17	0.269947	92	15.21	167	2.56225e-64	8.43269e-55	EyeGEx:PsychENCODE_eQTLs:DICE/NK:eQTLGen_cis_eQTLs:BIOSQTL/BIOS_eQTL_geneLevel:GTEx/v8/Esophagus_Mucosa:GTEx/v8/Lung:GTEx/v8/Testis:GTEx/v8/Thyroid:GTEx/v7/Esophagus_Mucosa:GTEx/v7/Lung:GTEx/v7/Thyroid:GTEx/v6/Lung:GTEx/v6/Thyroid	NA	Yes	Left_Ventricle:Liver:IMR90:Mesenchymal_Stem_Cell:Mesendoderm:Trophoblast-like_Cell:hESC	7.059e-12	rs7313797;rs117121174;rs4766638;rs7313797:rs117121174	45
ENSG00000110906	KCTD10	12	109886461	109915349	-1	protein_coding	83892	KCTD10	0.17267	0.585873	30	15.21	225	3.27170000000001e-310	0	EyeGEx:eQTLcatalogue/BLUEPRINT_ge_monocyte:eQTLcatalogue/CEDAR_B-cell_CD19:eQTLcatalogue/CEDAR_ileum:eQTLcatalogue/CEDAR_monocyte_CD14:eQTLcatalogue/CEDAR_neutrophil_CD15:eQTLcatalogue/CEDAR_platelet:eQTLcatalogue/CEDAR_rectum:eQTLcatalogue/CEDAR_T-cell_CD4:eQTLcatalogue/CEDAR_T-cell_CD8:eQTLcatalogue/CEDAR_transverse_colon:eQTLcatalogue/Fairfax_2012_B-cell_CD19:eQTLcatalogue/Fairfax_2014_IFN24:e…	NA	Yes	Adult_Cortex:Fetal_Cortex:Left_Ventricle:Liver:IMR90:Mesenchymal_Stem_Cell:Mesendoderm:Trophoblast-like_Cell:hESC	3.04e-18	rs7313797;rs117121174;rs4766638;rs7313797:rs117121174:rs12828640:rs3858704:rs11066015;rs11065836;rs117121174:rs4766638	45
ENSG00000151148	UBE3B	12	109915207	109974507	1	protein_coding	89910	UBE3B	0.00938771	0.786226	33	21.8	212	8.4931e-269	0	TIGER/Nom_Alonso_Pancreatic_islets:EyeGEx:eQTLcatalogue/BLUEPRINT_ge_monocyte:eQTLcatalogue/BLUEPRINT_ge_neutrophil:eQTLcatalogue/CEDAR_monocyte_CD14:eQTLcatalogue/CEDAR_neutrophil_CD15:eQTLcatalogue/CEDAR_T-cell_CD8:eQTLcatalogue/CEDAR_transverse_colon:eQTLcatalogue/Fairfax_2014_IFN24:eQTLcatalogue/Fairfax_2014_LPS24:eQTLcatalogue/Fairfax_2014_naive:eQTLcatalogue/GENCORD_ge_fibroblast:eQTLcatalo…	NA	Yes	Adult_Cortex:Fetal_Cortex:Left_Ventricle:Liver:IMR90:Mesenchymal_Stem_Cell:Mesendoderm:Trophoblast-like_Cell:hESC	3.04e-18	rs7313797;rs117121174;rs4766638;rs7313797:rs117121174:rs12828640:rs3858704:rs11066015;rs11065836;rs117121174:rs4766638	45
ENSG00000139428	MMAB	12	109991542	110011679	-1	protein_coding	326625	MMAB	0.00387716	2.91819	47	12.59	185	1.8761e-118	0	TIGER/Nom_Alonso_Pancreatic_islets:Nom_InsPIRE_Islets_Gene_eQTLs_Nominal_Pvalues:EyeGEx:eQTLcatalogue/BrainSeq_ge_brain:eQTLcatalogue/Fairfax_2014_IFN24:eQTLcatalogue/GENCORD_ge_LCL:eQTLcatalogue/GEUVADIS_ge_LCL:eQTLcatalogue/Lepik_2017_ge_blood:eQTLcatalogue/TwinsUK_ge_fat:eQTLcatalogue/TwinsUK_ge_LCL:eQTLcatalogue/TwinsUK_ge_skin:PsychENCODE_eQTLs:DICE/T_CD8_naive_activated:eQTLGen_cis_eQTLs:BI…	NA	Yes	Adult_Cortex:IMR90:Mesenchymal_Stem_Cell	7.059e-12	rs7313797;rs4766638;rs117121174:rs7313797	45
ENSG00000110921	MVK	12	110011060	110035067	1	protein_coding	4598	MVK	0.0421614	-0.508882	33	9.872	155	3.14665e-34	0	EyeGEx:eQTLcatalogue/Lepik_2017_ge_blood:PsychENCODE_eQTLs:eQTLGen_cis_eQTLs:BIOSQTL/BIOS_eQTL_geneLevel:CMC_SVA_cis:GTEx/v8/Adrenal_Gland:GTEx/v8/Whole_Blood:GTEx/v8/Brain_Cortex:GTEx/v8/Breast_Mammary_Tissue:GTEx/v8/Esophagus_Gastroesophageal_Junction:GTEx/v8/Esophagus_Mucosa:GTEx/v8/Liver:GTEx/v8/Lung:GTEx/v8/Nerve_Tibial:GTEx/v8/Skin_Not_Sun_Exposed_Suprapubic:GTEx/v8/Skin_Sun_Exposed_Lower_l…	NA	Yes	Adult_Cortex:IMR90:Mesenchymal_Stem_Cell	7.059e-12	rs7313797;rs117121174:rs7313797	45
ENSG00000139438	FAM222A	12	110152033	110208312	1	protein_coding	84915	FAM222A	0.400389	NA	3	7.859	5	0.000101664	1.68498e-12	EyeGEx:GTEx/v8/Skin_Sun_Exposed_Lower_leg	NA	Yes	Promoter_anchored_loops:Adult_Cortex:Fetal_Cortex:IMR90:Mesenchymal_Stem_Cell:Mesendoderm:Neural_Progenitor_Cell:Trophoblast-like_Cell:hESC	7.059e-12	rs117121174;rs7313797;rs4766638;rs7313797:rs117121174:rs4766638:rs11066015:rs12828640	45
ENSG00000111199	TRPV4	12	110220890	110271212	-1	protein_coding	59341	TRPV4	7.31947e-06	-0.73897	21	9.526	89	3.4483e-48	0	TIGER/Nom_Alonso_Pancreatic_islets:Nom_InsPIRE_Islets_Gene_eQTLs_Nominal_Pvalues:eQTLcatalogue/GENCORD_ge_fibroblast:eQTLcatalogue/Lepik_2017_ge_blood:DICE/Monocyte_classical:eQTLGen_cis_eQTLs:BIOSQTL/BIOS_eQTL_geneLevel:GTEx/v8/Adipose_Subcutaneous:GTEx/v8/Adipose_Visceral_Omentum:GTEx/v8/Adrenal_Gland:GTEx/v8/Whole_Blood:GTEx/v8/Artery_Aorta:GTEx/v8/Colon_Sigmoid:GTEx/v8/Esophagus_Mucosa:GTEx/v…	NA	Yes	EP_links_oneway:Promoter_anchored_loops:Spleen:IMR90:Mesenchymal_Stem_Cell:Mesendoderm	7.059e-12	rs117121174;rs4766638;rs7313797:rs117121174	45
ENSG00000139433	GLTP	12	110288748	110318293	-1	protein_coding	51228	GLTP	0.227089	0.0638576	51	13.45	105	0	0	TIGER/Nom_Alonso_Pancreatic_islets:Nom_InsPIRE_Islets_Gene_eQTLs_Nominal_Pvalues:EyeGEx:eQTLcatalogue/BLUEPRINT_ge_neutrophil:eQTLcatalogue/BLUEPRINT_ge_T-cell:eQTLcatalogue/BrainSeq_ge_brain:eQTLcatalogue/CEDAR_T-cell_CD8:eQTLcatalogue/GENCORD_ge_T-cell:eQTLcatalogue/Lepik_2017_ge_blood:eQTLcatalogue/TwinsUK_ge_fat:PsychENCODE_eQTLs:scRNA_eQTLs/PBMC:DICE/T_CD4_naive:DICE/T_CD4_TFH:DICE/T_CD4_TH1…	NA	Yes	Promoter_anchored_loops:Adult_Cortex:Fetal_Cortex:Left_Ventricle:Liver:IMR90:Mesenchymal_Stem_Cell	7.059e-12	rs4766638;rs117121174;rs7313797;rs2078847;rs4766638:rs7313797:rs117121174	45
ENSG00000139437	TCHP	12	110338069	110421646	1	protein_coding	84260	TCHP	6.99625e-12	-0.572434	7	21	41	6.0427e-28	0	eQTLGen_cis_eQTLs:BIOSQTL/BIOS_eQTL_geneLevel:CMC_SVA_cis:GTEx/v8/Esophagus_Mucosa:GTEx/v8/Esophagus_Muscularis:GTEx/v8/Cells_Cultured_fibroblasts	NA	Yes	Adult_Cortex:Fetal_Cortex	8.329e-10	rs117121174;rs4766638;rs7313797;rs7313797:rs117121174	45
ENSG00000139436	GIT2	12	110367607	110434194	-1	protein_coding	9815	GIT2	0.970633	-0.942959	4	17.68	75	7.5067e-29	0	eQTLGen_cis_eQTLs:BIOSQTL/BIOS_eQTL_geneLevel:GTEx/v8/Adipose_Subcutaneous:GTEx/v8/Artery_Tibial:GTEx/v8/Nerve_Tibial:GTEx/v7/Adipose_Subcutaneous:GTEx/v7/Artery_Tibial	NA	Yes	Left_Ventricle:GM12878:Mesenchymal_Stem_Cell:Mesendoderm:hESC	6.524e-09	rs117121174;rs4766638;rs117121174:rs4766638:rs7313797	45
ENSG00000076513	ANKRD13A	12	110436991	110477568	1	protein_coding	88455	ANKRD13A	0.350625	-0.732035	3	13.56	18	9.1355e-07	0.00288096	eQTLGen_cis_eQTLs:GTEx/v7/Adipose_Visceral_Omentum	NA	Yes	Left_Ventricle:GM12878:Mesenchymal_Stem_Cell:Mesendoderm:hESC	6.524e-09	rs4766638;rs117121174;rs117121174:rs4766638:rs7313797	45
ENSG00000174456	C12orf76	12	110465872	110511491	-1	protein_coding	400073	C12orf76	0.000101301	-0.549718	3	0.932	33	1.4683e-11	0	PsychENCODE_eQTLs:eQTLGen_cis_eQTLs:BIOSQTL/BIOS_eQTL_geneLevel:GTEx/v8/Skin_Sun_Exposed_Lower_leg	NA	Yes	Promoter_anchored_loops:Left_Ventricle:IMR90:Mesenchymal_Stem_Cell	8.329e-10	rs117121174;rs4766638;rs2040571;rs2078847;rs12828640;rs117121174:rs4766638:rs11066015	45
ENSG00000122970	IFT81	12	110562140	110656602	1	protein_coding	28981	IFT81	5.7603e-07	-0.471138	10	4.109	80	1.23765e-09	5.40346e-26	GTEx/v8/Artery_Tibial:GTEx/v8/Breast_Mammary_Tissue:GTEx/v8/Esophagus_Gastroesophageal_Junction:GTEx/v8/Esophagus_Muscularis:GTEx/v8/Muscle_Skeletal:GTEx/v8/Cells_Cultured_fibroblasts:GTEx/v8/Skin_Sun_Exposed_Lower_leg:GTEx/v8/Thyroid:GTEx/v7/Breast_Mammary_Tissue:GTEx/v7/Esophagus_Gastroesophageal_Junction:GTEx/v7/Esophagus_Muscularis:GTEx/v7/Cells_Transformed_fibroblasts:GTEx/v7/Skin_Sun_Expose…	NA	Yes	Adult_Cortex:Fetal_Cortex:Left_Ventricle:IMR90:Mesenchymal_Stem_Cell	8.329e-10	rs117121174;rs4766638;rs7313797;rs117121174:rs4766638	45
ENSG00000174437	ATP2A2	12	110718561	110788898	1	protein_coding	488	ATP2A2	0.998231	NA	1	1.2	66	4.63609e-09	1.08885e-13	eQTLGen_cis_eQTLs:CMC_SVA_cis:GTEx/v8/Colon_Sigmoid:GTEx/v8/Esophagus_Gastroesophageal_Junction:GTEx/v8/Esophagus_Muscularis:GTEx/v8/Cells_Cultured_fibroblasts:GTEx/v7/Esophagus_Gastroesophageal_Junction:GTEx/v7/Esophagus_Muscularis:GTEx/v7/Cells_Transformed_fibroblasts	NA	Yes	Promoter_anchored_loops:Spleen:IMR90:Mesenchymal_Stem_Cell	1.171e-09	rs4766638;rs7313797;rs117121174:rs4766638	45
ENSG00000196510	ANAPC7	12	110810705	110841535	-1	protein_coding	51434	ANAPC7	0.999258	-0.621643	1	0.192	18	2.8413e-10	0	eQTLGen_cis_eQTLs:GTEx/v8/Muscle_Skeletal:GTEx/v8/Skin_Sun_Exposed_Lower_leg:GTEx/v8/Spleen:GTEx/v7/Muscle_Skeletal:GTEx/v6/Muscle_Skeletal	NA	Yes	Promoter_anchored_loops	3.722e-17	rs4766638;rs2078847;rs3858704;rs11832104:rs11065836;rs11832104:rs11832104:rs3858704:rs11065836:rs11066015	45
ENSG00000111229	ARPC3	12	110872630	110888227	-1	protein_coding	10094	ARPC3	0.931507	-0.463583	0	0	89	1.3959e-25	0	eQTLGen_cis_eQTLs:CMC_SVA_cis:GTEx/v8/Muscle_Skeletal:GTEx/v8/Thyroid:GTEx/v7/Muscle_Skeletal	NA	Yes	Promoter_anchored_loops:Adult_Cortex:Left_Ventricle:Liver:Spleen:GM12878:IMR90:Mesenchymal_Stem_Cell:Mesendoderm:hESC	2.062e-13	rs4766638;rs2078847;rs2040571;rs4766638:rs2040571;rs2078847:rs2040571:rs2078847:rs11066015;rs117121174:rs3858704:rs117121174	45
ENSG00000111231	GPN3	12	110890289	110907073	-1	protein_coding	51184	GPN3	0.000100472	-0.618749	2	2.754	265	3.27170000000001e-310	0	eQTLcatalogue/Alasoo_2018_ge_macrophage_IFNg:eQTLcatalogue/BLUEPRINT_ge_monocyte:eQTLcatalogue/BLUEPRINT_ge_neutrophil:eQTLcatalogue/CEDAR_monocyte_CD14:eQTLcatalogue/CEDAR_neutrophil_CD15:eQTLcatalogue/Fairfax_2014_IFN24:eQTLcatalogue/Fairfax_2014_LPS24:eQTLcatalogue/Fairfax_2014_LPS2:eQTLcatalogue/Fairfax_2014_naive:eQTLcatalogue/Lepik_2017_ge_blood:eQTLcatalogue/Naranbhai_2015_neutrophil_CD16:…	NA	Yes	Promoter_anchored_loops:Adult_Cortex:Fetal_Cortex:Left_Ventricle:Liver:Spleen:GM12878:IMR90:Mesenchymal_Stem_Cell:Mesendoderm:hESC	2.877e-19	rs117121174;rs4766638;rs2078847;rs12828640;rs3858704;rs7313797;rs2040571;rs11832104;rs11065836;rs4766638:rs117121174:rs11066015:rs3858704:rs7313797:rs3858704;rs11832104:rs11065836;rs11832104:rs11832104:rs3858704	45
ENSG00000204856	FAM216A	12	110906169	110928190	1	protein_coding	29902	FAM216A	0.0011163	-0.85449	2	2.754	265	1.3499e-87	0	eQTLcatalogue/Alasoo_2018_ge_macrophage_IFNg:eQTLcatalogue/Alasoo_2018_ge_macrophage_naive:eQTLcatalogue/BLUEPRINT_ge_monocyte:eQTLcatalogue/CEDAR_monocyte_CD14:eQTLcatalogue/Fairfax_2014_IFN24:eQTLcatalogue/Fairfax_2014_LPS24:eQTLcatalogue/Fairfax_2014_LPS2:eQTLcatalogue/Fairfax_2014_naive:eQTLGen_cis_eQTLs:BIOSQTL/BIOS_eQTL_geneLevel:GTEx/v8/Adipose_Subcutaneous:GTEx/v8/Adipose_Visceral_Omentum…	NA	Yes	Promoter_anchored_loops:Adult_Cortex:Fetal_Cortex:Left_Ventricle:Liver:Spleen:GM12878:IMR90:Mesenchymal_Stem_Cell:Mesendoderm:hESC	2.877e-19	rs117121174;rs4766638;rs2078847;rs12828640;rs2040571;rs3858704;rs11832104;rs11065836;rs7313797;rs4766638:rs117121174:rs11066015:rs3858704:rs7313797:rs3858704;rs11832104:rs11065836;rs11832104:rs11832104:rs3858704	45
ENSG00000111237	VPS29	12	110928902	110939922	-1	protein_coding	51699	VPS29	0.934744	-0.696583	0	0	214	7.66e-85	0	eQTLcatalogue/BLUEPRINT_ge_neutrophil:eQTLcatalogue/CEDAR_neutrophil_CD15:eQTLcatalogue/Fairfax_2014_IFN24:eQTLcatalogue/Fairfax_2014_naive:eQTLcatalogue/Lepik_2017_ge_blood:eQTLcatalogue/TwinsUK_ge_LCL:PsychENCODE_eQTLs:eQTLGen_cis_eQTLs:BIOSQTL/BIOS_eQTL_geneLevel:CMC_SVA_cis:GTEx/v8/Adipose_Subcutaneous:GTEx/v8/Adipose_Visceral_Omentum:GTEx/v8/Whole_Blood:GTEx/v8/Artery_Aorta:GTEx/v8/Artery_Ti…	NA	Yes	Promoter_anchored_loops:Adult_Cortex:Fetal_Cortex:Aorta:Left_Ventricle:Liver:Right_Ventricle:GM12878:IMR90:Mesenchymal_Stem_Cell:Mesendoderm:Trophoblast-like_Cell:hESC	3.04e-18	rs4766638;rs117121174;rs2078847;rs7313797;rs12828640;rs3858704;rs2040571;rs4766638:rs117121174:rs3858704:rs11066015:rs11065836;rs11832104:rs3858704;rs11065836;rs11832104:rs11065836:rs12828640:rs11066015	45
ENSG00000151164	RAD9B	12	110939460	110969891	1	protein_coding	144715	RAD9B	3.62699e-05	-0.761697	2	14.64	102	2.5484e-17	0	eQTLcatalogue/BLUEPRINT_ge_monocyte:eQTLcatalogue/Lepik_2017_ge_blood:eQTLcatalogue/Quach_2016_ge_monocyte_IAV:eQTLcatalogue/Quach_2016_ge_monocyte_naive:eQTLcatalogue/Quach_2016_ge_monocyte_Pam3CSK4:DICE/Monocyte_classical:eQTLGen_cis_eQTLs:BIOSQTL/BIOS_eQTL_geneLevel:GTEx/v8/Whole_Blood:GTEx/v8/Artery_Aorta:GTEx/v8/Heart_Left_Ventricle:GTEx/v8/Muscle_Skeletal:GTEx/v7/Liver:GTEx/v7/Muscle_Skelet…	NA	Yes	Adult_Cortex:Fetal_Cortex:Aorta:Left_Ventricle:Liver:Right_Ventricle:GM12878:IMR90:Mesenchymal_Stem_Cell:Mesendoderm:Trophoblast-like_Cell:hESC	3.04e-18	rs4766638;rs2078847;rs2040571;rs117121174:rs4766638:rs3858704:rs11066015:rs11065836;rs11832104:rs3858704;rs11065836;rs11832104:rs11065836:rs12828640:rs11066015;rs117121174	45
ENSG00000196850	PPTC7	12	110969120	111021125	-1	protein_coding	160760	PPTC7	0.354852	-2.6034	6	14.64	24	1.662e-11	0	eQTLcatalogue/Fairfax_2014_IFN24:eQTLcatalogue/Fairfax_2014_LPS24:DICE/B_cell_naive:eQTLGen_cis_eQTLs:GTEx/v7/Pituitary	NA	Yes	Promoter_anchored_loops:Adult_Cortex:Fetal_Cortex:Adrenal:Aorta:Left_Ventricle:Liver:Psoas:Right_Ventricle:Spleen:GM12878:IMR90:Mesenchymal_Stem_Cell:Mesendoderm:Trophoblast-like_Cell:hESC	1.428e-14	rs4766638;rs117121174;rs2078847;rs3858704;rs117121174:rs4766638:rs3858704:rs11066015:rs11066015;rs117121174:rs11065836;rs11832104:rs3858704;rs11065836;rs11832104:rs11065836	45
ENSG00000204852	TCTN1	12	111051832	111087235	1	protein_coding	79600	TCTN1	1.86861e-09	-0.456703	3	3.492	251	8.8502e-31	0	DICE/T_CD4_memory_TREG:eQTLGen_cis_eQTLs:BIOSQTL/BIOS_eQTL_geneLevel:GTEx/v8/Muscle_Skeletal:GTEx/v8/Nerve_Tibial:GTEx/v7/Heart_Left_Ventricle:GTEx/v7/Muscle_Skeletal:GTEx/v6/Muscle_Skeletal	NA	Yes	Promoter_anchored_loops:Left_Ventricle:Liver:GM12878:IMR90:Mesenchymal_Stem_Cell:Mesendoderm:Trophoblast-like_Cell:hESC	2.877e-19	rs4766638;rs2040571;rs2078847;rs12828640;rs3858704;rs11832104;rs11065836;rs117121174:rs3858704:rs11066015:rs4766638	45
ENSG00000122986	HVCN1	12	111065646	111142755	-1	protein_coding	84329	HVCN1	0.750491	-0.518136	4	3.492	74	5.6607e-10	0	eQTLcatalogue/CEDAR_T-cell_CD4:eQTLGen_cis_eQTLs:GTEx/v8/Artery_Tibial:GTEx/v8/Muscle_Skeletal:GTEx/v7/Muscle_Skeletal	NA	Yes	Promoter_anchored_loops:Adult_Cortex:Liver:GM12878:IMR90:Mesenchymal_Stem_Cell:Mesendoderm:Trophoblast-like_Cell:hESC	2.877e-19	rs4766638;rs117121174;rs3858704;rs11065836;rs11832104;rs3858704:rs117121174:rs4766638:rs11065836;rs11832104:rs3858704;rs11832104:rs11065836	45
ENSG00000186298	PPP1CC	12	111157485	111180744	-1	protein_coding	5501	PPP1CC	0.944905	NA	1	3.205	65	1.4867e-09	1.30719e-05	eQTLGen_cis_eQTLs:BIOSQTL/BIOS_eQTL_geneLevel:GTEx/v8/Esophagus_Mucosa:GTEx/v8/Muscle_Skeletal:GTEx/v8/Nerve_Tibial:GTEx/v7/Muscle_Skeletal	NA	Yes	Promoter_anchored_loops:Adult_Cortex:Fetal_Cortex:Aorta:Left_Ventricle:Liver:Right_Ventricle:GM12878:IMR90:Mesenchymal_Stem_Cell:Mesendoderm:Trophoblast-like_Cell:hESC	6.321e-23	rs117121174;rs4766638;rs2078847;rs3858704:rs117121174:rs4766638:rs11066015:rs7313797:rs12828640:rs3858704;rs11832104:rs11065836;rs11832104:rs11832104:rs11066015;rs11065836;rs117121174:rs3858704	45
ENSG00000173093	CCDC63	12	111284573	111345339	1	protein_coding	160762	CCDC63	4.48038e-10	0.140066	142	13.55	28	3.61235e-06	0.00217075	GTEx/v8/Heart_Left_Ventricle:GTEx/v8/Muscle_Skeletal:GTEx/v7/Muscle_Skeletal	NA	Yes	Promoter_anchored_loops	2.062e-13	rs11066015;rs117121174;rs2078847;rs2040571;rs117121174:rs2040571;rs2078847:rs2040571:rs2078847:rs11066015	45
ENSG00000111245	MYL2	12	111348623	111358526	-1	protein_coding	4633	MYL2	0.0168131	-0.496132	88	15.95	35	3.89802e-08	0.000194901	eQTLcatalogue/Fairfax_2012_B-cell_CD19:eQTLcatalogue/GEUVADIS_ge_LCL:GTEx/v8/Heart_Atrial_Appendage:GTEx/v7/Testis	NA	Yes	Promoter_anchored_loops	6.04e-16	rs2040571;rs2078847;rs11066015;rs117121174;rs12828640;rs11065836;rs11832104;rs117121174:rs11065836;rs11832104:rs3858704	45
ENSG00000111249	CUX2	12	111471828	111788358	1	protein_coding	23316	CUX2	0.999656	-1.06059	166	18.97	108	1.46778e-11	6.11257e-08	eQTLcatalogue/Quach_2016_ge_monocyte_naive:DICE/Monocyte_classical:GTEx/v8/Muscle_Skeletal:GTEx/v8/Pancreas:GTEx/v8/Stomach:GTEx/v8/Testis:GTEx/v7/Muscle_Skeletal:GTEx/v7/Stomach:GTEx/v6/Muscle_Skeletal:GTEx/v6/Thyroid	NA	Yes	Left_Ventricle:Liver:Spleen:IMR90:Mesenchymal_Stem_Cell:Mesendoderm:Trophoblast-like_Cell:hESC	6.321e-23	rs11066015;rs117121174;rs3858704;rs11832104;rs11065836;rs12828640;rs2040571;rs12828640:rs3858704:rs11066015;rs117121174:rs11065836;rs11832104:rs3858704;rs11832104:rs11065836:rs11066015;rs117121174:rs11832104:rs11066015:rs4766638	45
ENSG00000198324	FAM109A	12	111798455	111806925	-1	protein_coding	144717	FAM109A	0.00514983	-0.607261	4	3.578	285	9.1237e-60	0	TIGER/Nom_Alonso_Pancreatic_islets:eQTLcatalogue/Fairfax_2012_B-cell_CD19:PsychENCODE_eQTLs:eQTLGen_cis_eQTLs:BIOSQTL/BIOS_eQTL_geneLevel:CMC_SVA_cis:GTEx/v8/Whole_Blood:GTEx/v8/Lung:GTEx/v8/Pituitary:GTEx/v8/Spleen:GTEx/v7/Whole_Blood:GTEx/v7/Lung:GTEx/v7/Nerve_Tibial:GTEx/v6/Heart_Atrial_Appendage:GTEx/v6/Heart_Left_Ventricle	NA	Yes	Promoter_anchored_loops	2.877e-19	rs3858704;rs12828640;rs11066015;rs11065836;rs11832104	45
ENSG00000111252	SH2B3	12	111843752	111889427	1	protein_coding	10019	SH2B3	0.00592219	-0.243854	23	21.4	348	5.8159e-126	0	EyeGEx:eQTLcatalogue/BLUEPRINT_ge_neutrophil:eQTLcatalogue/GEUVADIS_ge_LCL:eQTLcatalogue/Lepik_2017_ge_blood:eQTLGen_cis_eQTLs:BIOSQTL/BIOS_eQTL_geneLevel:GTEx/v8/Whole_Blood:GTEx/v8/Lung:GTEx/v8/Pancreas	NA	Yes	Promoter_anchored_loops	1.736e-29	rs3858704;rs11066015;rs12828640;rs11832104;rs11065836;rs2040571;rs2078847;rs4766638:rs3858704:rs11066015	45
ENSG00000204842	ATXN2	12	111890018	112037480	-1	protein_coding	6311	ATXN2	0.999862	-0.359942	71	18.59	119	4.8753e-08	0.000196178	DICE/B_cell_naive:DICE/T_CD4_TH1:DICE/T_CD4_TH17:DICE/T_CD4_TH2:eQTLGen_cis_eQTLs:CMC_SVA_cis:GTEx/v8/Cells_Cultured_fibroblasts:GTEx/v8/Vagina:GTEx/v7/Adipose_Visceral_Omentum	NA	Yes	Left_Ventricle:Liver:GM12878:IMR90:Mesenchymal_Stem_Cell:Trophoblast-like_Cell	1.093e-26	rs3858704;rs11066015;rs11832104;rs11065836;rs2078847;rs4766638:rs3858704:rs11066015:rs117121174	45
ENSG00000089234	BRAP	12	112079950	112123790	-1	protein_coding	8315	BRAP	0.0157033	-0.900035	22	18.24	89	2.88645e-08	4.40544e-05	GTEx/v8/Testis:GTEx/v8/Thyroid:GTEx/v7/Testis:GTEx/v6/Testis	NA	Yes	Promoter_anchored_loops:Adult_Cortex:Fetal_Cortex:GM12878:IMR90:Mesenchymal_Stem_Cell:Mesendoderm:Trophoblast-like_Cell:hESC	1.736e-29	rs3858704;rs11066015;rs11832104;rs11065836;rs11066015:rs3858704	45
ENSG00000111271	ACAD10	12	112123857	112194903	1	protein_coding	80724	ACAD10	4.01457e-20	-0.311041	27	15.71	239	6.2173e-23	0	eQTLGen_cis_eQTLs:GTEx/v8/Brain_Frontal_Cortex_BA9:GTEx/v8/Heart_Left_Ventricle:GTEx/v8/Liver:GTEx/v8/Muscle_Skeletal:GTEx/v8/Cells_Cultured_fibroblasts:GTEx/v8/Testis:GTEx/v7/Brain_Hippocampus:GTEx/v7/Heart_Atrial_Appendage	NA	Yes	Promoter_anchored_loops:Adult_Cortex:Fetal_Cortex:GM12878:IMR90:Mesenchymal_Stem_Cell:Mesendoderm:Trophoblast-like_Cell:hESC	1.736e-29	rs3858704;rs11066015;rs11065836;rs11832104;rs11066015:rs3858704	45
ENSG00000257767	RP11-162P23.2	12	112191694	112229222	1	protein_coding	NA	NA	NA	NA	20	11.08	14	2.91981e-32	0	BIOSQTL/BIOS_eQTL_geneLevel	NA	Yes	Promoter_anchored_loops:Liver:GM12878:IMR90:Mesenchymal_Stem_Cell:Mesendoderm:Trophoblast-like_Cell:hESC	1.522e-28	rs11066015;rs3858704;rs11066015:rs3858704	45
ENSG00000111275	ALDH2	12	112204691	112247782	1	protein_coding	217	ALDH2	1.73245e-06	NA	35	34	334	1.0112e-228	0	EyeGEx:eQTLcatalogue/BLUEPRINT_ge_monocyte:eQTLcatalogue/BLUEPRINT_ge_neutrophil:eQTLcatalogue/BrainSeq_ge_brain:eQTLcatalogue/CEDAR_ileum:eQTLcatalogue/CEDAR_rectum:eQTLcatalogue/CEDAR_transverse_colon:eQTLcatalogue/Fairfax_2014_naive:eQTLcatalogue/HipSci_ge_iPSC:eQTLcatalogue/TwinsUK_ge_fat:eQTLcatalogue/TwinsUK_ge_skin:PsychENCODE_eQTLs:eQTLGen_cis_eQTLs:eQTLGen_trans_eQTLs:BIOSQTL/BIOS_eQTL_g…	NA	Yes	Promoter_anchored_loops:Adult_Cortex:Fetal_Cortex:Liver:GM12878:IMR90:Mesenchymal_Stem_Cell:Mesendoderm:Trophoblast-like_Cell:hESC	1.736e-29	rs11066015;rs3858704;rs11065836;rs11832104;rs2078847;rs12828640;rs2245019;rs2040571;rs11066015:rs3858704:rs4766638:rs117121174:rs12828640:rs11066015;rs117121174	1 day, 4:45:00
ENSG00000089022	MAPKAPK5	12	112279782	112334343	1	protein_coding	8550	MAPKAPK5	0.0234226	NA	45	18.25	585	6.1379e-48	0	EyeGEx:eQTLcatalogue/BLUEPRINT_ge_T-cell:eQTLcatalogue/Fairfax_2014_naive:eQTLcatalogue/GENCORD_ge_T-cell:eQTLcatalogue/Quach_2016_ge_monocyte_LPS:eQTLcatalogue/Quach_2016_ge_monocyte_naive:eQTLcatalogue/Quach_2016_ge_monocyte_Pam3CSK4:eQTLcatalogue/Quach_2016_ge_monocyte_R848:eQTLcatalogue/TwinsUK_ge_LCL:eQTLcatalogue/TwinsUK_ge_skin:PsychENCODE_eQTLs:DICE/B_cell_naive:eQTLGen_cis_eQTLs:BIOSQTL/…	NA	Yes	Promoter_anchored_loops:GM12878:IMR90:Mesenchymal_Stem_Cell	1.736e-29	rs3858704;rs11066015;rs2040571;rs11065836;rs11832104;rs12828640;rs2078847;rs117121174:rs3858704:rs11066015:rs2078847:rs2040571	45
ENSG00000198270	TMEM116	12	112369086	112450970	-1	protein_coding	89894	TMEM116	1.14999e-09	-0.62084	37	12.69	645	3.27170000000001e-310	0	TIGER/Nom_Alonso_Pancreatic_islets:EyeGEx:eQTLcatalogue/Alasoo_2018_ge_macrophage_naive:eQTLcatalogue/Alasoo_2018_ge_macrophage_Salmonella:eQTLcatalogue/BLUEPRINT_ge_monocyte:eQTLcatalogue/BLUEPRINT_ge_T-cell:eQTLcatalogue/BrainSeq_ge_brain:eQTLcatalogue/CEDAR_monocyte_CD14:eQTLcatalogue/Fairfax_2014_IFN24:eQTLcatalogue/Fairfax_2014_LPS24:eQTLcatalogue/Fairfax_2014_LPS2:eQTLcatalogue/Fairfax_2014…	NA	Yes	Promoter_anchored_loops:Adult_Cortex:Fetal_Cortex:IMR90:Mesenchymal_Stem_Cell	1.093e-26	rs11066015;rs3858704;rs11065836;rs11832104;rs11066015:rs3858704:rs117121174	45
ENSG00000089248	ERP29	12	112451120	112461255	1	protein_coding	10961	ERP29	0.470649	-0.618385	13	16.53	107	1.6955e-15	0	EyeGEx:eQTLcatalogue/Fairfax_2012_B-cell_CD19:eQTLcatalogue/Lepik_2017_ge_blood:DICE/T_CD4_naive:eQTLGen_cis_eQTLs:BIOSQTL/BIOS_eQTL_geneLevel:GTEx/v8/Nerve_Tibial:GTEx/v8/Skin_Sun_Exposed_Lower_leg:GTEx/v8/Thyroid	NA	Yes	Promoter_anchored_loops:Adult_Cortex:Fetal_Cortex:IMR90:Mesenchymal_Stem_Cell	2.528e-28	rs11066015;rs3858704;rs11065836;rs11832104;rs11066015:rs3858704:rs117121174	45
ENSG00000111300	NAA25	12	112464500	112546826	-1	protein_coding	80018	NAA25	0.99999	-1.15626	72	23.8	507	1.9775e-49	0	eQTLcatalogue/Alasoo_2018_ge_macrophage_Salmonella:eQTLcatalogue/BLUEPRINT_ge_monocyte:eQTLcatalogue/BLUEPRINT_ge_T-cell:eQTLcatalogue/TwinsUK_ge_blood:eQTLcatalogue/TwinsUK_ge_LCL:DICE/T_CD4_TH2:eQTLGen_cis_eQTLs:BIOSQTL/BIOS_eQTL_geneLevel:CMC_SVA_cis:GTEx/v8/Adipose_Subcutaneous:GTEx/v8/Adrenal_Gland:GTEx/v8/Whole_Blood:GTEx/v8/Brain_Caudate_basal_ganglia:GTEx/v8/Brain_Cerebellar_Hemisphere:GT…	NA	Yes	Adult_Cortex:Fetal_Cortex	2.528e-28	rs11066015;rs3858704;rs11065836;rs11832104;rs117121174:rs3858704:rs11066015	45
ENSG00000135148	TRAFD1	12	112563305	112591407	1	protein_coding	10906	TRAFD1	1.82692e-05	-1.37633	23	14.81	54	2.3352e-18	0	eQTLGen_cis_eQTLs:GTEx/v8/Adipose_Subcutaneous:GTEx/v7/Skin_Sun_Exposed_Lower_leg	NA	Yes	Promoter_anchored_loops:Adult_Cortex:Fetal_Cortex:Left_Ventricle:Liver:GM12878:IMR90:Mesenchymal_Stem_Cell:Mesendoderm:hESC	2.528e-28	rs11066015;rs3858704;rs11066015:rs3858704	45
ENSG00000173064	HECTD4	12	112597992	112819896	-1	protein_coding	283450	HECTD4	1	NA	154	21	493	3.2208e-68	0	EyeGEx:PsychENCODE_eQTLs:DICE/T_CD4_naive:DICE/T_CD8_naive:DICE/T_CD8_naive_activated:DICE/Monocyte_classical:DICE/Monocyte_non_classical:DICE/NK:DICE/T_CD4_TFH:DICE/T_CD4_TH1:DICE/T_CD4_TH17:DICE/T_CD4_TH1_17:DICE/T_CD4_TH2:DICE/T_CD4_memory_TREG:DICE/T_CD4_naive_TREG:eQTLGen_cis_eQTLs:BIOSQTL/BIOS_eQTL_geneLevel:CMC_SVA_cis:CMC_NoSVA_cis:GTEx/v8/Adipose_Subcutaneous:GTEx/v8/Adipose_Visceral_Ome…	NA	Yes	Promoter_anchored_loops:IMR90:Mesenchymal_Stem_Cell	2.559e-28	rs3858704;rs11066015;rs11065836;rs11832104;rs11066015:rs3858704	45
ENSG00000089009	RPL6	12	112842994	112856642	-1	protein_coding	6128	RPL6	0.988288	0.0267551	9	4.357	0	NA	NA	NA	NA	Yes	Promoter_anchored_loops:IMR90	9.444e-14	rs11066015;rs11066015:rs3858704	45
ENSG00000179295	PTPN11	12	112856155	112947717	1	protein_coding	5781	PTPN11	0.999877	-2.25304	20	15.03	46	1.2801e-14	0	eQTLGen_cis_eQTLs:BIOSQTL/BIOS_eQTL_geneLevel:GTEx/v8/Muscle_Skeletal	NA	Yes	Promoter_anchored_loops:IMR90	4.028e-24	rs11066015;rs3858704;rs11066015:rs3858704	45
ENSG00000089169	RPH3A	12	113008184	113336686	1	protein_coding	22895	RPH3A	0.738603	0.425292	4	1.596	0	NA	NA	NA	NA	No	NA	2.075e-17	rs11066015	45
ENSG00000089127	OAS1	12	113344582	113369990	1	protein_coding	4938	OAS1	0.00123924	-0.362759	0	0	7	5.7117e-08	0.000240066	eQTLGen_cis_eQTLs	NA	Yes	Promoter_anchored_loops:Mesendoderm:hESC	2.075e-17	rs3858704;rs11066015	45
ENSG00000111335	OAS2	12	113416200	113449528	1	protein_coding	4939	OAS2	1.89092e-14	-0.406421	0	0	4	1.2033e-09	1.31087e-05	eQTLGen_cis_eQTLs	NA	Yes	IMR90:Mesendoderm:hESC	3.04e-18	rs3858704;rs12828640:rs3858704:rs11066015;rs11065836;rs117121174:rs3858704;rs11832104:rs11065836;rs11832104:rs3858704;rs11832104:rs11065836:rs11066015	45
ENSG00000111344	RASAL1	12	113536624	113574044	-1	protein_coding	8437	RASAL1	4.85979e-08	1.58604	0	0	3	5.55974e-05	0.0148418	PsychENCODE_eQTLs:GTEx/v8/Pituitary	NA	Yes	Adult_Cortex:Fetal_Cortex	9.444e-14	rs11066015	45
ENSG00000139405	RITA1	12	113623331	113630173	1	protein_coding	84934	RITA1	0.00060807	0.0475683	0	0	2	4.16483e-06	0.0208241	eQTLcatalogue/Lepik_2017_ge_blood	NA	No	NA	0.002789	rs3858704	45
ENSG00000135116	HRK	12	117293949	117319246	-1	protein_coding	8739	HRK	NA	0.578	0	0	5	2.1279e-07	0.00209616	eQTLGen_trans_eQTLs	NA	No	NA	NA	rs3858704	45
ENSG00000088992	TESC	12	117476728	117537284	-1	protein_coding	54997	TESC	0.69214	NA	0	0	3	1.8337e-08	0.000247219	eQTLGen_trans_eQTLs	NA	No	NA	1.65e-11	rs2285626;rs12979148;rs7249692	59
ENSG00000176871	WSB2	12	118470712	118500235	-1	protein_coding	55884	WSB2	0.503215	-0.405006	0	0	10	2.5964e-14	0	eQTLGen_trans_eQTLs	NA	No	NA	0.003258	rs3858704	45
ENSG00000176834	VSIG10	12	118501398	118573831	-1	protein_coding	101928274	VSIG10	5.54755e-07	0.165325	0	0	9	8.1511e-22	0	eQTLGen_trans_eQTLs	NA	No	NA	0.003258	rs3858704	45
ENSG00000110987	BCL7A	12	122457328	122499948	1	protein_coding	605	BCL7A	0.215729	-2.82973	0	0	2	4.37078e-07	0.00125743	GTEx/v7/Skin_Not_Sun_Exposed_Suprapubic	NA	Yes	IMR90:Mesenchymal_Stem_Cell	NA	rs73231950	46
ENSG00000175727	MLXIP	12	122516628	122631894	1	protein_coding	22877	MLXIP	0.975748	NA	0	0	5	5.385e-06	0.0154677	PsychENCODE_eQTLs:eQTLGen_cis_eQTLs	NA	Yes	Adult_Cortex:Fetal_Cortex:GM12878:IMR90:Mesenchymal_Stem_Cell:Trophoblast-like_Cell	3.885e-08	rs73231950;rs1727307;rs1727307:rs73231950	46
ENSG00000176383	B3GNT4	12	122688090	122693499	1	protein_coding	79369	B3GNT4	3.9367e-06	NA	0	0	2	2.91489e-07	0.000163318	eQTLcatalogue/TwinsUK_ge_LCL:BIOSQTL/BIOS_eQTL_geneLevel:GTEx/v8/Skin_Sun_Exposed_Lower_leg:GTEx/v8/Thyroid:GTEx/v7/Thyroid	NA	Yes	Promoter_anchored_loops:Mesenchymal_Stem_Cell	3.361e-09	rs73231950;rs1727307:rs73231950;rs1727307:rs73231950:rs7315453	46
ENSG00000184047	DIABLO	12	122692210	122712081	-1	protein_coding	56616	DIABLO	0.000889965	-0.268036	0	0	6	2.1778e-12	0	eQTLcatalogue/Fairfax_2014_IFN24:eQTLGen_cis_eQTLs:BIOSQTL/BIOS_eQTL_geneLevel	NA	Yes	Mesenchymal_Stem_Cell	7.475e-06	rs73231950;rs1727307	46
ENSG00000256861	RP11-512M8.5	12	122692326	122750970	-1	protein_coding	NA	NA	NA	NA	0	0	1	2.32447e-39	0	BIOSQTL/BIOS_eQTL_geneLevel:xQTLServer_eQTLs	NA	Yes	Adult_Cortex:Fetal_Cortex:GM12878:IMR90:Mesenchymal_Stem_Cell:Mesendoderm:Trophoblast-like_Cell	3.885e-08	rs73231950;rs73231950:rs1727307:rs73231950;rs1727307	46
ENSG00000139719	VPS33A	12	122714111	122751068	-1	protein_coding	65082	VPS33A	0.687969	-0.341571	0	0	12	2.32447e-39	0	eQTLcatalogue/BLUEPRINT_ge_T-cell:eQTLcatalogue/CEDAR_platelet:eQTLcatalogue/TwinsUK_ge_blood:eQTLGen_cis_eQTLs:BIOSQTL/BIOS_eQTL_geneLevel:CMC_SVA_cis:CMC_NoSVA_cis:GTEx/v8/Adipose_Subcutaneous:GTEx/v8/Adipose_Visceral_Omentum:GTEx/v8/Artery_Aorta:GTEx/v8/Brain_Cerebellar_Hemisphere:GTEx/v8/Brain_Cerebellum:GTEx/v8/Esophagus_Muscularis:GTEx/v8/Heart_Left_Ventricle:GTEx/v8/Lung:GTEx/v8/Nerve_Tibi…	NA	Yes	Adult_Cortex:Fetal_Cortex:GM12878:IMR90:Mesenchymal_Stem_Cell:Mesendoderm:Trophoblast-like_Cell	3.885e-08	rs73231950;rs7315453;rs73231950:rs1727307:rs73231950;rs1727307	46
ENSG00000130779	CLIP1	12	122755979	122907179	-1	protein_coding	6249	CLIP1	0.968496	0.285418	2	2.976	16	1.45298e-08	2.08149e-05	eQTLcatalogue/Fairfax_2014_IFN24:eQTLcatalogue/TwinsUK_ge_fat:GTEx/v8/Artery_Tibial:GTEx/v8/Esophagus_Muscularis:GTEx/v8/Ovary	NA	Yes	Promoter_anchored_loops:Adult_Cortex:Fetal_Cortex:IMR90:Mesenchymal_Stem_Cell	1.353e-09	rs73231950;rs7315453;rs73231950:rs7315453:rs73231950;rs1727307:rs1727307:rs7315453;rs1727307	46
ENSG00000033030	ZCCHC8	12	122957417	122985518	-1	protein_coding	55596	ZCCHC8	0.777819	NA	0	0	46	1.2243e-12	0	eQTLGen_cis_eQTLs:BIOSQTL/BIOS_eQTL_geneLevel:GTEx/v8/Adipose_Subcutaneous:GTEx/v8/Whole_Blood:GTEx/v8/Brain_Cerebellar_Hemisphere:GTEx/v8/Thyroid:GTEx/v7/Adipose_Subcutaneous:GTEx/v7/Thyroid:GTEx/v6/Adipose_Subcutaneous	NA	Yes	Adult_Cortex:Fetal_Cortex:Liver:GM12878:IMR90:Mesenchymal_Stem_Cell:Mesendoderm:Trophoblast-like_Cell:hESC	1.696e-11	rs73231950;rs1727307;rs73231950:rs1727307:rs73231950;rs1727307:rs7315453:rs7315453;rs1727307:rs73231950;rs7315453:rs73231950;rs7315453	46
ENSG00000111011	RSRC2	12	122989190	123011547	-1	protein_coding	65117	RSRC2	0.992877	0.0151201	0	0	15	3.51616e-11	0	TIGER/Nom_Alonso_Pancreatic_islets:eQTLcatalogue/BLUEPRINT_ge_neutrophil:eQTLcatalogue/CEDAR_rectum:eQTLcatalogue/Kasela_2017_T-cell_CD4:eQTLcatalogue/Kasela_2017_T-cell_CD8:BIOSQTL/BIOS_eQTL_geneLevel:CMC_SVA_cis:GTEx/v7/Artery_Tibial	NA	Yes	Adult_Cortex:Fetal_Cortex:Aorta:Left_Ventricle:Liver:Right_Ventricle:GM12878:IMR90:Mesenchymal_Stem_Cell:Mesendoderm:Trophoblast-like_Cell:hESC	8.878e-12	rs73231950;rs73231950:rs7315453:rs1727307:rs73231950;rs1727307:rs7315453;rs1727307:rs73231950;rs7315453:rs73231950;rs7315453;rs1727307	46
ENSG00000184445	KNTC1	12	123011793	123110943	1	protein_coding	9735	KNTC1	4.77718e-32	-0.251481	1	8.986	160	1.0084e-13	0	eQTLcatalogue/BLUEPRINT_ge_monocyte:eQTLGen_cis_eQTLs	NA	Yes	Adult_Cortex:Fetal_Cortex:Aorta:Left_Ventricle:Liver:Right_Ventricle:GM12878:IMR90:Mesenchymal_Stem_Cell:Mesendoderm:Trophoblast-like_Cell:hESC	8.878e-12	rs73231950;rs1727307;rs7315453;rs73231950:rs7315453:rs1727307:rs73231950;rs1727307:rs7315453;rs1727307:rs73231950;rs7315453:rs73231950	46
ENSG00000196917	HCAR1	12	123104824	123215390	-1	protein_coding	27198	HCAR1	0.140999	-0.89126	1	0.689	19	5.44255e-39	0	eQTLGen_cis_eQTLs:BIOSQTL/BIOS_eQTL_geneLevel:GTEx/v8/Thyroid:GTEx/v7/Thyroid	NA	Yes	IMR90:Mesenchymal_Stem_Cell:Trophoblast-like_Cell	1.078e-09	rs73231950;rs7315453;rs1727307;rs73231950:rs7315453:rs73231950;rs1727307:rs1727307	46
ENSG00000182782	HCAR2	12	123185840	123187890	-1	protein_coding	338442	HCAR2	0.0201093	1.07703	0	0	5	2.63e-07	3.26313e-05	eQTLcatalogue/Fairfax_2014_LPS24:eQTLcatalogue/GEUVADIS_ge_LCL:eQTLGen_cis_eQTLs:BIOSQTL/BIOS_eQTL_geneLevel:GTEx/v8/Adipose_Subcutaneous	NA	Yes	IMR90:Mesenchymal_Stem_Cell	0.001386	rs73231950;rs7315453	46
ENSG00000255398	HCAR3	12	123199303	123201439	-1	protein_coding	8843	HCAR3	6.93118e-06	2.82613	0	0	272	5.4419e-32	0	eQTLGen_cis_eQTLs:BIOSQTL/BIOS_eQTL_geneLevel:GTEx/v8/Esophagus_Mucosa:GTEx/v8/Nerve_Tibial:GTEx/v8/Skin_Not_Sun_Exposed_Suprapubic:GTEx/v8/Skin_Sun_Exposed_Lower_leg:GTEx/v7/Esophagus_Mucosa	NA	Yes	IMR90:Mesenchymal_Stem_Cell:Trophoblast-like_Cell	1.504e-11	rs73231950;rs7315453;rs1727307;rs73231950:rs7315453:rs73231950;rs1727307:rs1727307	46
ENSG00000139726	DENR	12	123237321	123255611	1	protein_coding	8562	DENR	0.846253	-0.665629	0	0	101	1.3871e-33	0	eQTLcatalogue/CEDAR_neutrophil_CD15:eQTLGen_cis_eQTLs:GTEx/v8/Brain_Cerebellum:GTEx/v8/Esophagus_Mucosa	NA	Yes	Promoter_anchored_loops:Fetal_Cortex:IMR90:Mesenchymal_Stem_Cell:Trophoblast-like_Cell	8.878e-12	rs73231950;rs7315453;rs1727307;rs73231950:rs73231950;rs1727307:rs7315453:rs1727307	46
ENSG00000130783	CCDC62	12	123258874	123312075	1	protein_coding	84660	CCDC62	1.43535e-12	-0.176641	1	7.999	246	1.48173e-06	0.000716645	PsychENCODE_eQTLs:eQTLGen_cis_eQTLs:GTEx/v8/Adipose_Visceral_Omentum:GTEx/v8/Adrenal_Gland:GTEx/v8/Brain_Cerebellum:GTEx/v7/Adrenal_Gland	NA	Yes	Adult_Cortex:Left_Ventricle:Liver:Spleen:GM12878:IMR90:Mesenchymal_Stem_Cell:Mesendoderm:Trophoblast-like_Cell:hESC	8.878e-12	rs73231950;rs1727307;rs7315453;rs1727307:rs73231950;rs1727307:rs73231950:rs7315453:rs7315453	46
ENSG00000130787	HIP1R	12	123319000	123347507	1	protein_coding	9026	HIP1R	1.44297e-06	-0.568881	1	2.403	237	9.32395e-16	3.03362e-13	TIGER/Nom_Alonso_Pancreatic_islets:EyeGEx:eQTLcatalogue/BLUEPRINT_ge_T-cell:eQTLcatalogue/CEDAR_B-cell_CD19:eQTLcatalogue/CEDAR_rectum:eQTLGen_cis_eQTLs:BIOSQTL/BIOS_eQTL_geneLevel:GTEx/v8/Brain_Caudate_basal_ganglia:GTEx/v8/Brain_Cerebellar_Hemisphere:GTEx/v8/Brain_Cerebellum:GTEx/v8/Cells_Cultured_fibroblasts:GTEx/v8/Skin_Not_Sun_Exposed_Suprapubic:GTEx/v8/Skin_Sun_Exposed_Lower_leg:GTEx/v7/Bra…	NA	Yes	Promoter_anchored_loops:Adult_Cortex:Fetal_Cortex:IMR90:Mesenchymal_Stem_Cell	8.878e-12	rs73231950;rs1727307;rs7315453;rs73231950:rs7315453:rs1727307:rs73231950;rs1727307:rs7315453;rs1727307:rs73231950	46
ENSG00000139722	VPS37B	12	123349882	123380991	-1	protein_coding	79720	VPS37B	0.67681	-1.60126	0	0	379	4.1371e-49	0	eQTLcatalogue/CEDAR_monocyte_CD14:eQTLcatalogue/Lepik_2017_ge_blood:PsychENCODE_eQTLs:eQTLGen_cis_eQTLs:BIOSQTL/BIOS_eQTL_geneLevel:GTEx/v8/Artery_Tibial:GTEx/v8/Nerve_Tibial:GTEx/v7/Artery_Tibial	NA	Yes	IMR90:Mesenchymal_Stem_Cell	1.163e-11	rs7315453;rs73231950;rs1727307;rs1727307:rs73231950;rs1727307:rs73231950:rs7315453:rs7315453	46
ENSG00000150967	ABCB9	12	123405498	123466196	-1	protein_coding	23457	ABCB9	0.00290111	NA	29	16.51	747	5.4493e-251	0	TIGER/Nom_Alonso_Pancreatic_islets:EyeGEx:eQTLcatalogue/BLUEPRINT_ge_T-cell:eQTLcatalogue/CEDAR_T-cell_CD4:eQTLcatalogue/Fairfax_2014_naive:eQTLcatalogue/HipSci_ge_iPSC:eQTLcatalogue/Kasela_2017_T-cell_CD4:eQTLcatalogue/Kasela_2017_T-cell_CD8:eQTLcatalogue/TwinsUK_ge_skin:PsychENCODE_eQTLs:DICE/B_cell_naive:DICE/T_CD4_naive:DICE/T_CD8_naive:DICE/NK:DICE/T_CD4_TFH:DICE/T_CD4_TH1:DICE/T_CD4_TH17:DI…	NA	Yes	Promoter_anchored_loops:Spleen:GM12878:IMR90:Mesenchymal_Stem_Cell:Mesendoderm:Trophoblast-like_Cell:hESC	8.878e-12	rs73231950;rs7315453;rs1727307;rs1727307:rs73231950;rs1727307:rs73231950:rs7315453:rs7315453	46
ENSG00000111325	OGFOD2	12	123459127	123464590	1	protein_coding	79676	OGFOD2	3.80506e-07	-0.495076	12	16.51	393	6.15261e-31	0	eQTLcatalogue/BrainSeq_ge_brain:eQTLcatalogue/GENCORD_ge_fibroblast:eQTLcatalogue/HipSci_ge_iPSC:PsychENCODE_eQTLs:eQTLGen_cis_eQTLs:BIOSQTL/BIOS_eQTL_geneLevel:xQTLServer_eQTLs:CMC_SVA_cis:CMC_NoSVA_cis:GTEx/v8/Adipose_Visceral_Omentum:GTEx/v8/Cells_EBV-transformed_lymphocytes:GTEx/v8/Whole_Blood:GTEx/v8/Artery_Aorta:GTEx/v8/Artery_Tibial:GTEx/v8/Brain_Cerebellum:GTEx/v8/Colon_Transverse:GTEx/v8…	NA	Yes	EP_links_oneway:Adult_Cortex:Fetal_Cortex:Spleen:GM12878:IMR90:Mesenchymal_Stem_Cell:Mesendoderm:Trophoblast-like_Cell:hESC	8.878e-12	rs1727307;rs73231950;rs7315453;rs73231950:rs7315453:rs73231950;rs1727307:rs1727307:rs7315453;rs1727307:rs73231950;rs7315453:rs73231950	46
ENSG00000182196	ARL6IP4	12	123464607	123467456	1	protein_coding	51329	ARL6IP4	0.0112342	-0.527874	9	16.51	763	9.1792e-120	0	EyeGEx:eQTLcatalogue/CEDAR_T-cell_CD4:eQTLcatalogue/Fairfax_2014_IFN24:eQTLcatalogue/Fairfax_2014_LPS24:eQTLcatalogue/Fairfax_2014_LPS2:eQTLcatalogue/Fairfax_2014_naive:PsychENCODE_eQTLs:eQTLGen_cis_eQTLs:BIOSQTL/BIOS_eQTL_geneLevel:GTEx/v8/Adipose_Visceral_Omentum:GTEx/v8/Adrenal_Gland:GTEx/v8/Whole_Blood:GTEx/v8/Artery_Tibial:GTEx/v8/Breast_Mammary_Tissue:GTEx/v8/Colon_Sigmoid:GTEx/v8/Colon_Tra…	NA	Yes	Promoter_anchored_loops:Spleen:GM12878:IMR90:Mesenchymal_Stem_Cell:Mesendoderm:Trophoblast-like_Cell:hESC	8.878e-12	rs73231950;rs1727307;rs7315453;rs1727307:rs73231950;rs1727307:rs73231950:rs7315453:rs7315453	46
ENSG00000090975	PITPNM2	12	123468027	123634562	-1	protein_coding	57605	PITPNM2	0.999994	-0.297419	109	16.51	405	1.83114e-38	0	EyeGEx:eQTLGen_cis_eQTLs:BIOSQTL/BIOS_eQTL_geneLevel:GTEx/v8/Brain_Cerebellar_Hemisphere:GTEx/v8/Brain_Cerebellum:GTEx/v8/Esophagus_Mucosa:GTEx/v8/Cells_Cultured_fibroblasts:GTEx/v8/Testis:GTEx/v8/Thyroid:GTEx/v7/Brain_Cerebellar_Hemisphere:GTEx/v7/Brain_Cerebellum:GTEx/v7/Esophagus_Mucosa:GTEx/v7/Cells_Transformed_fibroblasts:GTEx/v7/Thyroid:GTEx/v6/Artery_Tibial:GTEx/v6/Brain_Cerebellar_Hemisph…	NA	Yes	Promoter_anchored_loops:EP_correlation_organ_oneway:Adult_Cortex:Fetal_Cortex:Adrenal:Aorta:Bladder:Dorsolateral_Prefrontal_Cortex:Left_Ventricle:Liver:Lung:Pancreas:Right_Ventricle:Spleen:GM12878:IMR90:Mesenchymal_Stem_Cell:Mesendoderm:Neural_Progenitor_Cell:Trophoblast-like_Cell:hESC	8.878e-12	rs73231950;rs1727307;rs7315453;rs1727307:rs1727307:rs7315453:rs73231950:rs7315453;rs1727307:rs73231950	46
ENSG00000051825	MPHOSPH9	12	123636867	123728561	-1	protein_coding	10198	MPHOSPH9	0.000759987	-0.131484	275	17.2	705	1.0433e-73	0	TIGER/Nom_Alonso_Pancreatic_islets:EyeGEx:eQTLcatalogue/BLUEPRINT_ge_monocyte:eQTLcatalogue/HipSci_ge_iPSC:eQTLcatalogue/Lepik_2017_ge_blood:eQTLcatalogue/Quach_2016_ge_monocyte_LPS:eQTLcatalogue/Quach_2016_ge_monocyte_naive:eQTLcatalogue/Quach_2016_ge_monocyte_Pam3CSK4:eQTLcatalogue/Quach_2016_ge_monocyte_R848:DICE/B_cell_naive:DICE/Monocyte_classical:DICE/Monocyte_non_classical:DICE/T_CD4_TFH:D…	NA	Yes	Promoter_anchored_loops:Adult_Cortex:Fetal_Cortex:Aorta:Left_Ventricle:Liver:Spleen:GM12878:IMR90:Mesenchymal_Stem_Cell:Mesendoderm:Trophoblast-like_Cell:hESC	8.878e-12	rs73231950;rs7315453;rs1727307;rs1727307:rs73231950:rs7315453:rs1727307:rs73231950;rs1727307:rs12424178:rs921919;rs12424178:rs73231950	46
ENSG00000130921	C12orf65	12	123717463	123742506	1	protein_coding	91574	C12orf65	0.172329	0.226571	149	17.2	787	8.8571e-24	0	eQTLcatalogue/BLUEPRINT_ge_neutrophil:eQTLcatalogue/Fairfax_2014_LPS2:eQTLcatalogue/HipSci_ge_iPSC:eQTLcatalogue/Nedelec_2016_ge_macrophage_Salmonella:eQTLcatalogue/Quach_2016_ge_monocyte_R848:PsychENCODE_eQTLs:DICE/T_CD4_TFH:DICE/T_CD4_TH17:eQTLGen_cis_eQTLs:BIOSQTL/BIOS_eQTL_geneLevel:xQTLServer_eQTLs:GTEx/v8/Adipose_Subcutaneous:GTEx/v8/Adipose_Visceral_Omentum:GTEx/v8/Whole_Blood:GTEx/v8/Arte…	NA	Yes	Promoter_anchored_loops:EP_correlation_organ_oneway:Adult_Cortex:Fetal_Cortex:Aorta:Left_Ventricle:Liver:Lung:Pancreas:Spleen:GM12878:IMR90:Mesenchymal_Stem_Cell:Mesendoderm:Trophoblast-like_Cell:hESC	8.878e-12	rs73231950;rs1727307;rs7315453;rs1727307:rs73231950:rs7315453:rs1727307:rs73231950;rs1727307:rs73231950;rs7315453:rs12424178:rs921919;rs12424178:rs7315453	46
ENSG00000111328	CDK2AP1	12	123745528	123756881	-1	protein_coding	8099	CDK2AP1	0.742361	NA	107	16.17	843	3.27170000000001e-310	0	TIGER/Nom_Alonso_Pancreatic_islets:eQTLcatalogue/BLUEPRINT_ge_monocyte:eQTLcatalogue/BLUEPRINT_ge_neutrophil:eQTLcatalogue/BLUEPRINT_ge_T-cell:eQTLcatalogue/GENCORD_ge_fibroblast:eQTLcatalogue/GENCORD_ge_LCL:eQTLcatalogue/GENCORD_ge_T-cell:eQTLcatalogue/GEUVADIS_ge_LCL:eQTLcatalogue/HipSci_ge_iPSC:eQTLcatalogue/Lepik_2017_ge_blood:eQTLcatalogue/Nedelec_2016_ge_macrophage_Salmonella:eQTLcatalogue/…	NA	Yes	Promoter_anchored_loops:EP_correlation_cell_type_oneway:Fetal_Cortex:Aorta:Left_Ventricle:Liver:Spleen:GM12878:IMR90:Mesenchymal_Stem_Cell:Mesendoderm:Trophoblast-like_Cell:hESC	8.878e-12	rs73231950;rs1727307;rs7315453;rs7315453:rs73231950;rs1727307:rs73231950:rs73231950;rs1727307:rs1727307:rs73231950	46
ENSG00000139697	SBNO1	12	123773656	123849390	-1	protein_coding	55206	SBNO1	1	-1.46751	315	22.9	809	7.0022e-27	0	EyeGEx:eQTLcatalogue/BLUEPRINT_ge_T-cell:eQTLcatalogue/CEDAR_monocyte_CD14:eQTLcatalogue/CEDAR_neutrophil_CD15:eQTLcatalogue/CEDAR_T-cell_CD4:eQTLcatalogue/CEDAR_T-cell_CD8:eQTLcatalogue/CEDAR_transverse_colon:eQTLcatalogue/TwinsUK_ge_fat:eQTLcatalogue/TwinsUK_ge_skin:PsychENCODE_eQTLs:eQTLGen_cis_eQTLs:BIOSQTL/BIOS_eQTL_geneLevel:GTEx/v8/Adipose_Subcutaneous:GTEx/v8/Artery_Aorta:GTEx/v8/Artery_T…	NA	Yes	Promoter_anchored_loops:Adult_Cortex:Fetal_Cortex	8.878e-12	rs7315453;rs1727307;rs73231950;rs1727307:rs73231950:rs1727307:rs7315453:rs73231950;rs1727307:rs7315453	46
ENSG00000183955	SETD8	12	123868320	123893905	1	protein_coding	387893	SETD8	0.945359	0.950256	102	14.64	802	3.27170000000001e-310	0	EyeGEx:eQTLcatalogue/BLUEPRINT_ge_monocyte:eQTLcatalogue/BLUEPRINT_ge_neutrophil:eQTLcatalogue/CEDAR_neutrophil_CD15:eQTLcatalogue/Fairfax_2014_IFN24:eQTLcatalogue/Fairfax_2014_LPS24:eQTLcatalogue/Fairfax_2014_naive:eQTLcatalogue/Lepik_2017_ge_blood:eQTLcatalogue/Naranbhai_2015_neutrophil_CD16:eQTLcatalogue/TwinsUK_ge_blood:PsychENCODE_eQTLs:eQTLGen_cis_eQTLs:BIOSQTL/BIOS_eQTL_geneLevel:xQTLServe…	NA	Yes	Promoter_anchored_loops:Adult_Cortex:Fetal_Cortex	8.878e-12	rs7315453;rs73231950;rs1727307;rs1727307:rs1727307:rs73231950:rs7315453:rs73231950;rs7315453:rs7315453	46
ENSG00000150977	RILPL2	12	123899936	123921264	-1	protein_coding	196383	RILPL2	0.0608722	-0.185559	52	14.37	587	1.2179e-246	0	TIGER/Nom_Alonso_Pancreatic_islets:eQTLcatalogue/BLUEPRINT_ge_neutrophil:eQTLcatalogue/CEDAR_B-cell_CD19:eQTLcatalogue/CEDAR_neutrophil_CD15:eQTLcatalogue/CEDAR_platelet:eQTLcatalogue/CEDAR_T-cell_CD4:eQTLcatalogue/CEDAR_T-cell_CD8:eQTLcatalogue/Fairfax_2012_B-cell_CD19:eQTLcatalogue/Fairfax_2014_IFN24:eQTLcatalogue/Fairfax_2014_LPS24:eQTLcatalogue/Fairfax_2014_LPS2:eQTLcatalogue/Fairfax_2014_nai…	NA	Yes	GM12878:IMR90:Mesenchymal_Stem_Cell	8.878e-12	rs73231950;rs7315453;rs1727307;rs73231950:rs1727307:rs73231950;rs1727307:rs7315453:rs73231950;rs7315453:rs73231950	46
ENSG00000184209	SNRNP35	12	123942188	123957701	1	protein_coding	11066	SNRNP35	2.28333e-07	-0.463368	30	7.306	469	1.1685e-19	0	TIGER/Nom_Alonso_Pancreatic_islets:eQTLcatalogue/BLUEPRINT_ge_T-cell:eQTLcatalogue/CEDAR_B-cell_CD19:eQTLcatalogue/Fairfax_2012_B-cell_CD19:eQTLcatalogue/Fairfax_2014_IFN24:eQTLcatalogue/Fairfax_2014_naive:eQTLcatalogue/HipSci_ge_iPSC:eQTLcatalogue/Kasela_2017_T-cell_CD4:eQTLcatalogue/Kasela_2017_T-cell_CD8:PsychENCODE_eQTLs:eQTLGen_cis_eQTLs:BIOSQTL/BIOS_eQTL_geneLevel:GTEx/v8/Adipose_Subcutaneo…	NA	Yes	Promoter_anchored_loops:GM12878:IMR90:Mesenchymal_Stem_Cell	8.878e-12	rs73231950;rs1727307;rs7315453;rs7315453:rs73231950:rs73231950;rs1727307:rs73231950;rs1727307:rs1727307:rs73231950	46
ENSG00000188026	RILPL1	12	123955925	124018265	-1	protein_coding	353116	RILPL1	0.0660196	-0.388983	23	7.287	67	3.5999e-56	0	eQTLcatalogue/BLUEPRINT_ge_T-cell:eQTLcatalogue/Fairfax_2014_IFN24:eQTLcatalogue/HipSci_ge_iPSC:eQTLcatalogue/Kasela_2017_T-cell_CD4:eQTLcatalogue/Naranbhai_2015_neutrophil_CD16:eQTLGen_cis_eQTLs:BIOSQTL/BIOS_eQTL_geneLevel:GTEx/v8/Whole_Blood:GTEx/v8/Artery_Aorta:GTEx/v8/Artery_Tibial:GTEx/v8/Muscle_Skeletal:GTEx/v8/Nerve_Tibial:GTEx/v8/Skin_Not_Sun_Exposed_Suprapubic:GTEx/v8/Spleen:GTEx/v7/Arte…	NA	Yes	Promoter_anchored_loops	3.006e-11	rs73231950;rs7315453;rs1727307;rs1727307:rs1727307:rs73231950:rs7315453	46
ENSG00000086598	TMED2	12	124069078	124083116	1	protein_coding	10959	TMED2	0.79768	0.132646	0	0	30	1.371e-27	0	EyeGEx:eQTLGen_cis_eQTLs:GTEx/v8/Adipose_Subcutaneous:GTEx/v8/Adipose_Visceral_Omentum:GTEx/v8/Artery_Aorta:GTEx/v8/Artery_Tibial:GTEx/v8/Esophagus_Mucosa:GTEx/v8/Lung:GTEx/v8/Nerve_Tibial:GTEx/v8/Pituitary:GTEx/v8/Cells_Cultured_fibroblasts:GTEx/v8/Skin_Not_Sun_Exposed_Suprapubic:GTEx/v8/Skin_Sun_Exposed_Lower_leg:GTEx/v8/Thyroid:GTEx/v7/Adipose_Subcutaneous:GTEx/v7/Adipose_Visceral_Omentum:GTEx…	NA	Yes	Promoter_anchored_loops:IMR90:Mesenchymal_Stem_Cell	8.878e-12	rs73231950;rs1727307;rs7315453;rs73231950:rs73231950;rs1727307:rs7315453:rs1727307:rs73231950;rs1727307:rs73231950	46
ENSG00000111364	DDX55	12	124086624	124105488	1	protein_coding	57696	DDX55	6.00816e-06	1.21512	0	0	135	5.1942e-113	0	TIGER/Nom_Alonso_Pancreatic_islets:EyeGEx:eQTLcatalogue/BLUEPRINT_ge_monocyte:eQTLcatalogue/BLUEPRINT_ge_T-cell:eQTLcatalogue/BrainSeq_ge_brain:eQTLcatalogue/CEDAR_T-cell_CD4:eQTLcatalogue/CEDAR_T-cell_CD8:eQTLcatalogue/Fairfax_2012_B-cell_CD19:eQTLcatalogue/Fairfax_2014_IFN24:eQTLcatalogue/Fairfax_2014_LPS24:eQTLcatalogue/Fairfax_2014_naive:eQTLcatalogue/GENCORD_ge_fibroblast:eQTLcatalogue/GENCO…	NA	Yes	Promoter_anchored_loops:Adult_Cortex:Fetal_Cortex:Aorta:Left_Ventricle:Liver:Spleen:GM12878:IMR90:Mesenchymal_Stem_Cell:Mesendoderm:Trophoblast-like_Cell:hESC	8.878e-12	rs73231950;rs1727307;rs7315453;rs1727307:rs73231950;rs1727307:rs73231950:rs7315453:rs73231950;rs1727307:rs7315453	46
ENSG00000111361	EIF2B1	12	124104953	124118313	-1	protein_coding	1967	EIF2B1	0.104796	1.41411	0	0	347	8.97710000000001e-310	0	TIGER/Nom_Alonso_Pancreatic_islets:eQTLcatalogue/Fairfax_2012_B-cell_CD19:eQTLcatalogue/Fairfax_2014_naive:eQTLcatalogue/Lepik_2017_ge_blood:eQTLcatalogue/TwinsUK_ge_fat:DICE/T_CD4_TH17:eQTLGen_cis_eQTLs:BIOSQTL/BIOS_eQTL_geneLevel:xQTLServer_eQTLs:CMC_SVA_cis:CMC_NoSVA_cis:GTEx/v8/Adipose_Subcutaneous:GTEx/v8/Cells_EBV-transformed_lymphocytes:GTEx/v8/Whole_Blood:GTEx/v8/Heart_Atrial_Appendage:GT…	NA	Yes	Fetal_Cortex:Aorta:Left_Ventricle:Liver:Spleen:GM12878:IMR90:Mesenchymal_Stem_Cell:Mesendoderm:Trophoblast-like_Cell:hESC	8.878e-12	rs73231950;rs1727307;rs7315453;rs7315453:rs73231950;rs1727307:rs73231950:rs1727307:rs7315453;rs1727307:rs73231950	46
ENSG00000111358	GTF2H3	12	124118375	124147153	1	protein_coding	2967	GTF2H3	1.59171e-05	-0.673058	0	0	101	2.13673e-13	0	eQTLGen_cis_eQTLs:xQTLServer_eQTLs:CMC_SVA_cis:GTEx/v8/Brain_Cerebellum	NA	Yes	Fetal_Cortex:Aorta:Left_Ventricle:Liver:Spleen:GM12878:IMR90:Mesenchymal_Stem_Cell:Mesendoderm:Trophoblast-like_Cell:hESC	8.878e-12	rs73231950;rs7315453;rs7315453:rs73231950;rs1727307:rs73231950:rs1727307:rs7315453;rs1727307:rs73231950	46
ENSG00000168778	TCTN2	12	124155660	124192948	1	protein_coding	79867	TCTN2	1.97172e-05	0.504613	1	0.803	56	3.6193e-60	0	TIGER/Nom_Alonso_Pancreatic_islets:EyeGEx:eQTLcatalogue/BrainSeq_ge_brain:eQTLcatalogue/GENCORD_ge_LCL:eQTLcatalogue/GEUVADIS_ge_LCL:eQTLcatalogue/HipSci_ge_iPSC:eQTLcatalogue/TwinsUK_ge_fat:eQTLcatalogue/TwinsUK_ge_LCL:eQTLcatalogue/TwinsUK_ge_skin:PsychENCODE_eQTLs:DICE/T_CD4_naive:DICE/T_CD4_TH17:DICE/T_CD4_memory_TREG:eQTLGen_cis_eQTLs:BIOSQTL/BIOS_eQTL_geneLevel:CMC_SVA_cis:CMC_NoSVA_cis:GTE…	NA	Yes	Promoter_anchored_loops:Adult_Cortex:Fetal_Cortex:Left_Ventricle:GM12878:IMR90:Mesenchymal_Stem_Cell:Mesendoderm:Trophoblast-like_Cell:hESC	8.878e-12	rs73231950;rs1727307;rs7315453;rs73231950:rs73231950;rs1727307:rs7315453:rs1727307:rs7315453;rs1727307:rs73231950;rs7315453:rs73231950;rs1727307:rs12424178:rs921919;rs12424178:rs921919	46
ENSG00000185344	ATP6V0A2	12	124196865	124246302	1	protein_coding	23545	ATP6V0A2	4.73811e-06	0.215524	4	2.342	86	4.14524e-74	0	TIGER/Nom_Alonso_Pancreatic_islets:EyeGEx:eQTLcatalogue/Alasoo_2018_ge_macrophage_IFNg_Salmonella:eQTLcatalogue/BLUEPRINT_ge_monocyte:eQTLcatalogue/BLUEPRINT_ge_neutrophil:eQTLcatalogue/BLUEPRINT_ge_T-cell:eQTLcatalogue/CEDAR_neutrophil_CD15:eQTLcatalogue/CEDAR_rectum:eQTLcatalogue/Fairfax_2012_B-cell_CD19:eQTLcatalogue/GENCORD_ge_fibroblast:eQTLcatalogue/GENCORD_ge_T-cell:eQTLcatalogue/Lepik_201…	NA	Yes	Fetal_Cortex:IMR90:Mesenchymal_Stem_Cell	4.246e-09	rs73231950;rs7315453;rs921919;rs7315453:rs73231950;rs1727307:rs73231950	46
ENSG00000197653	DNAH10	12	124247042	124420753	1	protein_coding	196385	DNAH10	4.14032e-37	-0.520605	3	1.968	9	1.18852e-13	6.80727e-40	eQTLcatalogue/BrainSeq_ge_brain:BIOSQTL/BIOS_eQTL_geneLevel:CMC_SVA_cis:GTEx/v8/Adipose_Subcutaneous:GTEx/v8/Adipose_Visceral_Omentum:GTEx/v8/Artery_Tibial:GTEx/v8/Colon_Sigmoid:GTEx/v8/Esophagus_Gastroesophageal_Junction:GTEx/v8/Esophagus_Muscularis:GTEx/v8/Nerve_Tibial:GTEx/v8/Cells_Cultured_fibroblasts:GTEx/v8/Testis:GTEx/v8/Thyroid:GTEx/v7/Adipose_Visceral_Omentum:GTEx/v7/Artery_Tibial:GTEx/v…	NA	Yes	Promoter_anchored_loops:GM12878:IMR90:Mesenchymal_Stem_Cell:Mesendoderm:Trophoblast-like_Cell:hESC	0.006782	rs73231950;rs921919;rs1727307;rs73231950:rs73231950	46
ENSG00000119242	CCDC92	12	124403207	124457378	-1	protein_coding	80212	CCDC92	0.36885	NA	2	1.858	54	2.2436e-80	0	eQTLcatalogue/BLUEPRINT_ge_T-cell:eQTLcatalogue/Fairfax_2012_B-cell_CD19:eQTLcatalogue/GEUVADIS_ge_LCL:eQTLcatalogue/Lepik_2017_ge_blood:eQTLcatalogue/Nedelec_2016_ge_macrophage_Salmonella:eQTLcatalogue/Quach_2016_ge_monocyte_IAV:eQTLcatalogue/TwinsUK_ge_LCL:DICE/T_CD4_naive_TREG:eQTLGen_cis_eQTLs:BIOSQTL/BIOS_eQTL_geneLevel:CMC_SVA_cis:GTEx/v8/Adipose_Subcutaneous:GTEx/v8/Adipose_Visceral_Omentu…	NA	Yes	Promoter_anchored_loops:Adult_Cortex:Aorta:Dorsolateral_Prefrontal_Cortex:Hippocampus:Left_Ventricle:Liver:Lung:Pancreas:Spleen:GM12878:IMR90:Mesenchymal_Stem_Cell:Mesendoderm:Trophoblast-like_Cell:hESC	1.995e-14	rs921919;rs73231950;rs7315453;rs1727307;rs73231950:rs7315453:rs73231950;rs1727307:rs73231950;rs1727307:rs921919:rs12424178:rs921919;rs12424178:rs921919;rs73231950:rs1727307:rs73231950	46
ENSG00000250091	DNAH10OS	12	124410971	124419531	-1	protein_coding	NA	DNAH10OS	0.0133664	NA	1	0.661	4	1.08983e-24	9.32913e-43	eQTLGen_cis_eQTLs:BIOSQTL/BIOS_eQTL_geneLevel:CMC_SVA_cis:CMC_NoSVA_cis:GTEx/v8/Adipose_Subcutaneous:GTEx/v8/Adipose_Visceral_Omentum:GTEx/v8/Artery_Aorta:GTEx/v8/Artery_Tibial:GTEx/v8/Brain_Cortex:GTEx/v8/Brain_Frontal_Cortex_BA9:GTEx/v8/Brain_Nucleus_accumbens_basal_ganglia:GTEx/v8/Breast_Mammary_Tissue:GTEx/v8/Colon_Sigmoid:GTEx/v8/Colon_Transverse:GTEx/v8/Esophagus_Gastroesophageal_Junction:G…	NA	Yes	Promoter_anchored_loops:Aorta:Dorsolateral_Prefrontal_Cortex:Hippocampus:Left_Ventricle:Liver:Lung:Pancreas:Spleen:GM12878:IMR90:Mesenchymal_Stem_Cell:Mesendoderm:Trophoblast-like_Cell:hESC	1.995e-14	rs921919;rs73231950;rs73231950:rs12424178:rs921919:rs921919;rs12424178	46
ENSG00000179195	ZNF664	12	124456392	124499986	1	protein_coding	144348	ZNF664	0.00162679	-0.308462	1	0.519	6	8.3335e-32	0	EyeGEx:eQTLcatalogue/BLUEPRINT_ge_T-cell:eQTLcatalogue/Fairfax_2012_B-cell_CD19:eQTLcatalogue/Fairfax_2014_IFN24:eQTLcatalogue/GENCORD_ge_T-cell:eQTLcatalogue/TwinsUK_ge_fat:DICE/T_CD4_naive_activated:DICE/T_CD4_naive_TREG:eQTLGen_cis_eQTLs:BIOSQTL/BIOS_eQTL_geneLevel:GTEx/v8/Heart_Atrial_Appendage:GTEx/v8/Heart_Left_Ventricle:GTEx/v8/Ovary:GTEx/v8/Cells_Cultured_fibroblasts:GTEx/v8/Thyroid:GTEx/…	NA	Yes	Promoter_anchored_loops:Adult_Cortex:Aorta:Dorsolateral_Prefrontal_Cortex:Hippocampus:Left_Ventricle:Liver:Lung:Pancreas:Spleen:GM12878:IMR90:Mesenchymal_Stem_Cell:Mesendoderm:Trophoblast-like_Cell:hESC	1.995e-14	rs73231950;rs921919;rs73231950:rs7315453:rs73231950;rs1727307:rs73231950;rs7315453;rs1727307:rs921919:rs12424178:rs921919;rs12424178:rs921919;rs73231950:rs1727307:rs73231950	46
ENSG00000178882	FAM101A	12	124457788	124800570	1	protein_coding	100533183	FAM101A	0.212634	0.253239	1	0.519	2	3.54512e-06	0.00307881	GTEx/v8/Pituitary	NA	Yes	Promoter_anchored_loops:Adult_Cortex:Aorta:Dorsolateral_Prefrontal_Cortex:Hippocampus:Left_Ventricle:Liver:Lung:Pancreas:Spleen:GM12878:IMR90:Mesenchymal_Stem_Cell:Mesendoderm:Trophoblast-like_Cell:hESC	1.995e-14	rs73231950;rs201750024;rs73231950:rs7315453:rs73231950;rs1727307:rs73231950;rs7315453;rs1727307:rs921919:rs12424178:rs921919;rs12424178:rs921919;rs73231950:rs1727307:rs73231950	46
ENSG00000196498	NCOR2	12	124808961	125052135	-1	protein_coding	9612	NCOR2	1	0.737392	2	2.063	3	4.2503e-12	0	eQTLGen_cis_eQTLs:CMC_SVA_cis	NA	Yes	Promoter_anchored_loops:Adult_Cortex:Fetal_Cortex:IMR90:Mesenchymal_Stem_Cell	3.484e-05	rs12424178;rs921919;rs921919:rs201750024:rs12424178:rs921919;rs12424178:rs73231950	46
ENSG00000073060	SCARB1	12	125261402	125367214	-1	protein_coding	949	SCARB1	0.0772244	NA	100	12.79	84	3.1596e-188	0	eQTLcatalogue/BLUEPRINT_ge_monocyte:eQTLcatalogue/BLUEPRINT_ge_neutrophil:eQTLcatalogue/CEDAR_ileum:eQTLcatalogue/CEDAR_transverse_colon:eQTLcatalogue/Fairfax_2014_IFN24:eQTLcatalogue/Fairfax_2014_LPS24:eQTLcatalogue/Fairfax_2014_LPS2:eQTLcatalogue/Fairfax_2014_naive:eQTLcatalogue/Lepik_2017_ge_blood:eQTLcatalogue/Nedelec_2016_ge_macrophage_Listeria:eQTLcatalogue/Quach_2016_ge_monocyte_IAV:eQTLca…	NA	Yes	Promoter_anchored_loops	1.995e-14	rs12424178;rs921919;rs10773112;rs201750024;rs2245019;rs12424178:rs921919;rs12424178:rs201750024:rs10773112	1 day, 4:46:00
ENSG00000150991	UBC	12	125396150	125401914	-1	protein_coding	7316	UBC	0.704157	2.94258	1	0.858	9	3.8304e-07	4.09325e-05	eQTLGen_cis_eQTLs:GTEx/v8/Cells_Cultured_fibroblasts	NA	Yes	Promoter_anchored_loops:Adult_Cortex:Fetal_Cortex:Left_Ventricle:IMR90:Mesenchymal_Stem_Cell	8.98e-13	rs201750024;rs10773112;rs12424178;rs12424178:rs921919:rs921919;rs12424178:rs201750024:rs73231950	46
ENSG00000150990	DHX37	12	125431371	125473668	-1	protein_coding	57647	DHX37	0.978475	1.11629	2	10.17	0	NA	NA	NA	NA	No	NA	NA	rs921919	46
ENSG00000184992	BRI3BP	12	125478246	125515777	1	protein_coding	140707	BRI3BP	0.125133	0.557936	0	0	2	5.9572e-07	0.000819113	eQTLGen_cis_eQTLs:BIOSQTL/BIOS_eQTL_geneLevel	NA	No	NA	NA	rs921919;rs12424178	46
ENSG00000081760	AACS	12	125549925	125627873	1	protein_coding	65985	AACS	4.24569e-12	0.0629795	0	0	24	2.9054e-06	0.00339558	TIGER/Nom_Alonso_Pancreatic_islets:eQTLGen_cis_eQTLs:GTEx/v8/Esophagus_Mucosa	NA	Yes	Promoter_anchored_loops	2.114e-05	rs12424178	46
ENSG00000139364	TMEM132B	12	125671382	126146917	1	protein_coding	114795	TMEM132B	0.455835	1.57188	0	0	7	1.821e-07	1.14698e-09	TIGER/Nom_Alonso_Pancreatic_islets:CMC_SVA_cis:CMC_NoSVA_cis:GTEx/v8/Brain_Cerebellum	NA	No	NA	2.479e-11	rs12424178;rs921919;rs201750024	46
ENSG00000139370	SLC15A4	12	129277739	129308528	-1	protein_coding	121260	SLC15A4	2.99439e-09	0.534952	0	0	3	1.8114e-06	0.0140991	eQTLGen_trans_eQTLs	NA	No	NA	NA	rs3858704	45
ENSG00000133104	SPG20	13	36875775	36944317	-1	protein_coding	23111	SPG20	0.000159489	-0.0396526	0	0	5	2.438e-07	0.00234402	eQTLGen_trans_eQTLs	NA	No	NA	NA	rs3858704	45
ENSG00000120697	ALG5	13	37523912	37574398	-1	protein_coding	29880	ALG5	0.00342997	NA	0	0	1	2.1669e-06	0.0165277	eQTLGen_trans_eQTLs	NA	No	NA	0.04112	rs58434384	59
ENSG00000133106	EPSTI1	13	43460524	43566407	-1	protein_coding	94240	EPSTI1	1.35092e-18	1.26349	0	0	8	4.8392e-11	0	eQTLGen_trans_eQTLs	NA	No	NA	0.003258	rs3858704	45
ENSG00000102804	TSC22D1	13	45007655	45151283	-1	protein_coding	8848	TSC22D1	0.941152	-0.0783322	0	0	1	1.2154e-09	3.8994e-05	eQTLGen_trans_eQTLs	NA	No	NA	0.01301	rs3858704	45
ENSG00000102445	KIAA0226L	13	46916139	47012325	-1	protein_coding	80183	KIAA0226L	2.0228e-11	-0.613834	0	0	8	3.613e-09	0.000106819	eQTLGen_trans_eQTLs	NA	No	NA	0.003258	rs3858704	45
ENSG00000139668	WDFY2	13	52158644	52336171	1	protein_coding	115825	WDFY2	0.003595	-0.77094	0	0	5	1.112e-07	0.00126728	eQTLGen_trans_eQTLs	NA	No	NA	NA	rs3858704	45
ENSG00000102796	DHRS12	13	52342129	52378293	-1	protein_coding	79758	DHRS12	0.00725776	-0.134211	0	0	1	3.974e-07	0.00349436	eQTLGen_trans_eQTLs	NA	No	NA	1.964e-07	rs55931203	54
ENSG00000125249	RAP2A	13	98086476	98121382	1	protein_coding	5911	RAP2A	0.71734	-1.15639	0	0	8	3.9071e-08	0.000527141	eQTLGen_trans_eQTLs	NA	No	NA	0.003258	rs3858704	45
ENSG00000088387	DOCK9	13	99445741	99738879	-1	protein_coding	23348	DOCK9	0.999999	-0.43441	0	0	2	2.2101e-06	0.0167138	eQTLGen_trans_eQTLs	NA	No	NA	NA	rs3858704	45
ENSG00000102524	TNFSF13B	13	108903588	108960832	1	protein_coding	10673	TNFSF13B	0.954794	0.395396	0	0	4	1.6878e-07	0.00167032	eQTLGen_trans_eQTLs	NA	No	NA	1.026e-13	rs4665963;rs780095	9
ENSG00000139832	RAB20	13	111175417	111214080	-1	protein_coding	55647	RAB20	0.697709	NA	0	0	9	2.4194e-18	0	eQTLGen_trans_eQTLs	NA	No	NA	0.003258	rs3858704	45
ENSG00000214274	ANG	14	21152336	21167130	1	protein_coding	283	ANG	0.224577	3.11693	0	0	7	2.0001e-09	5.61167e-05	eQTLGen_trans_eQTLs	NA	No	NA	0.003258	rs3858704	45
ENSG00000165795	NDRG2	14	21484922	21539031	-1	protein_coding	57447	NDRG2	0.126597	-0.622537	0	0	1	3.1529e-06	0.0225641	eQTLGen_trans_eQTLs	NA	No	NA	7.143e-08	rs12787646	37
ENSG00000165801	ARHGEF40	14	21538429	21558399	1	protein_coding	55701	ARHGEF40	7.18568e-05	-0.609283	0	0	8	4.9135e-19	0	eQTLGen_trans_eQTLs	NA	No	NA	0.003258	rs3858704	45
ENSG00000129473	BCL2L2	14	23767999	23780968	1	protein_coding	599	BCL2L2	0.312496	-0.97775	0	0	1	2.8243e-06	0.0206306	eQTLGen_trans_eQTLs	NA	No	NA	1.65e-11	rs7249692	59
ENSG00000092096	SLC22A17	14	23815515	23822121	-1	protein_coding	51310	SLC22A17	0.772287	-0.404608	0	0	6	1.8575e-09	5.64016e-05	eQTLGen_trans_eQTLs	NA	No	NA	NA	rs3858704	45
ENSG00000186648	LRRC16B	14	24521206	24538937	1	protein_coding	90668	LRRC16B	4.86595e-05	NA	0	0	1	5.9488e-06	0.038241	eQTLGen_trans_eQTLs	NA	No	NA	2.471e-07	rs695110	41
[truncated: 566 more rows]

## Sheet: S9
GENE	CHR	START	STOP	NSNPS	NPARAM	N	ZSTAT	P	SYMBOL	FDR
[truncated: 409 more rows]

[truncated: 9 more sheets: S10, S11, S12, S13, S14, S15, S16, S17, S18]
