# Supplementary material for: Unraveling the Genetic Interplay and Therapeutic Potentials between Major Depressive Disorder and Metabolic Syndrome: Multi-Ancestry and Multi-Trait Genome-Wide Association Analyses
Source: Research Square preprint supplement (doi:10.21203/rs.3.rs-4193051/v1), 2024-04-01

**Supplementary Figure 1. The  $\lambda_{\text{meta}}$  values among the three European ancestry MD GWAS cohorts.**

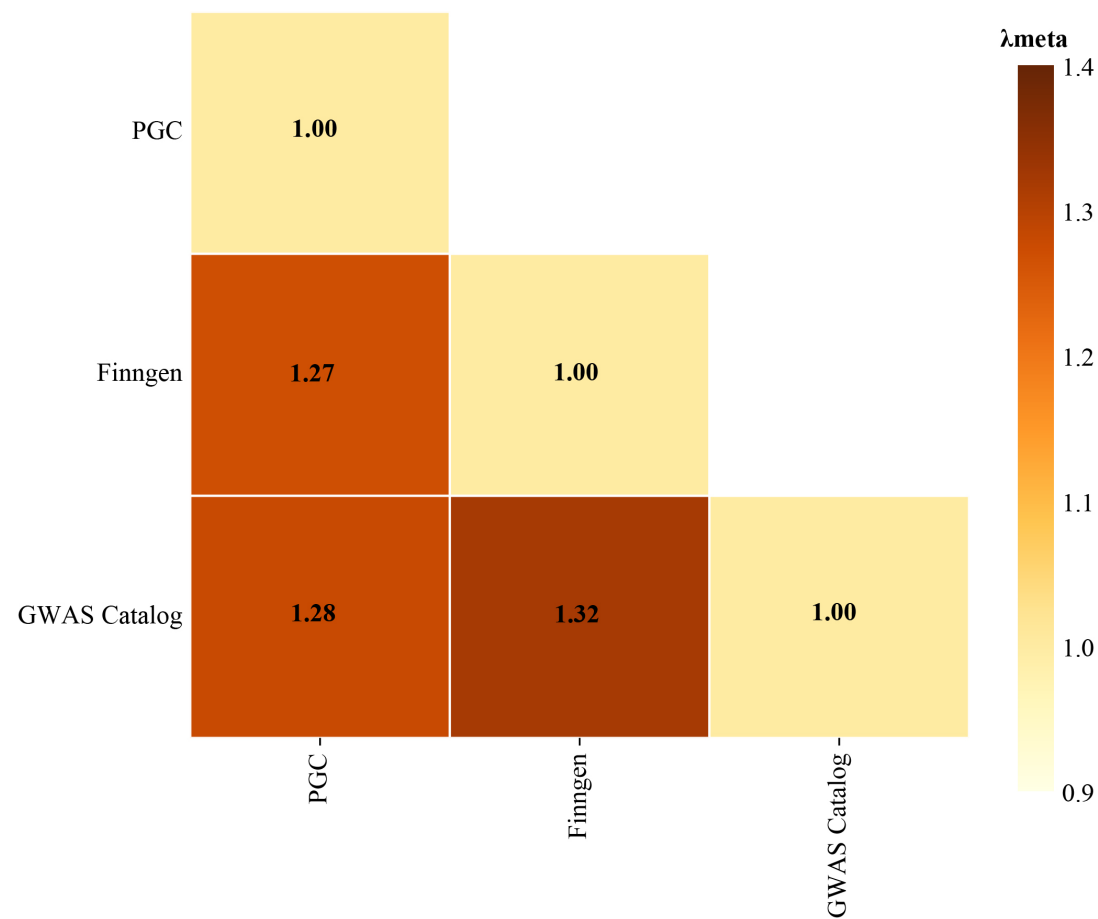

**Supplementary Figure 2. PZ plot for the MAMT, displaying the observed p-values on the y-axis and the corresponding p-values derived from the z-scores estimated by beta and se on the x-axis.**

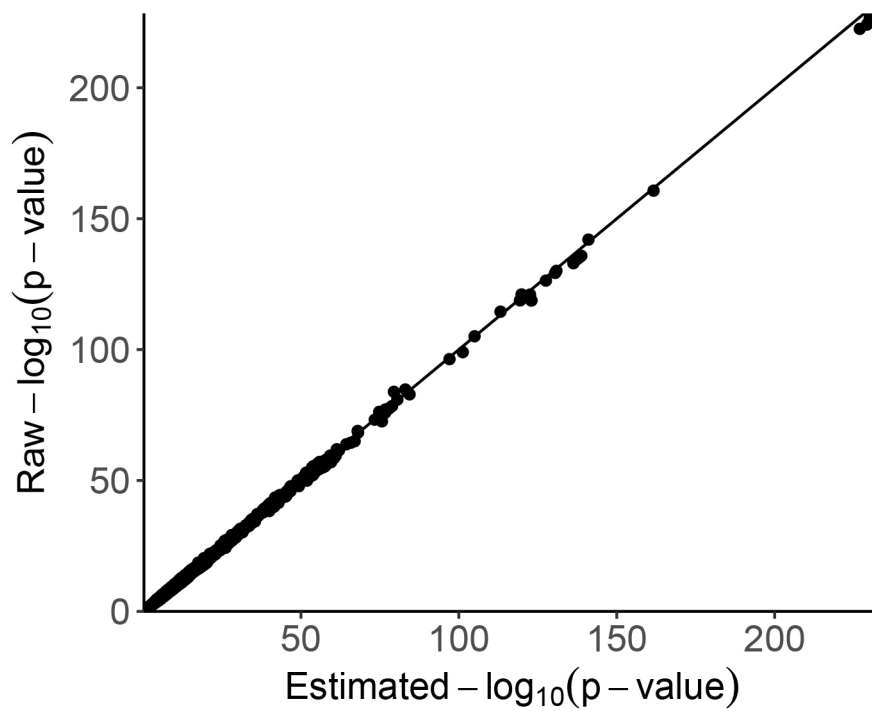

**Supplementary Figure 3. Pearson correlations of the absolute effect sizes of pleiotropic SNVs between MAMT and MA, MA-EAS, MA-EUR, MT-EAS, and MT-EUR.**

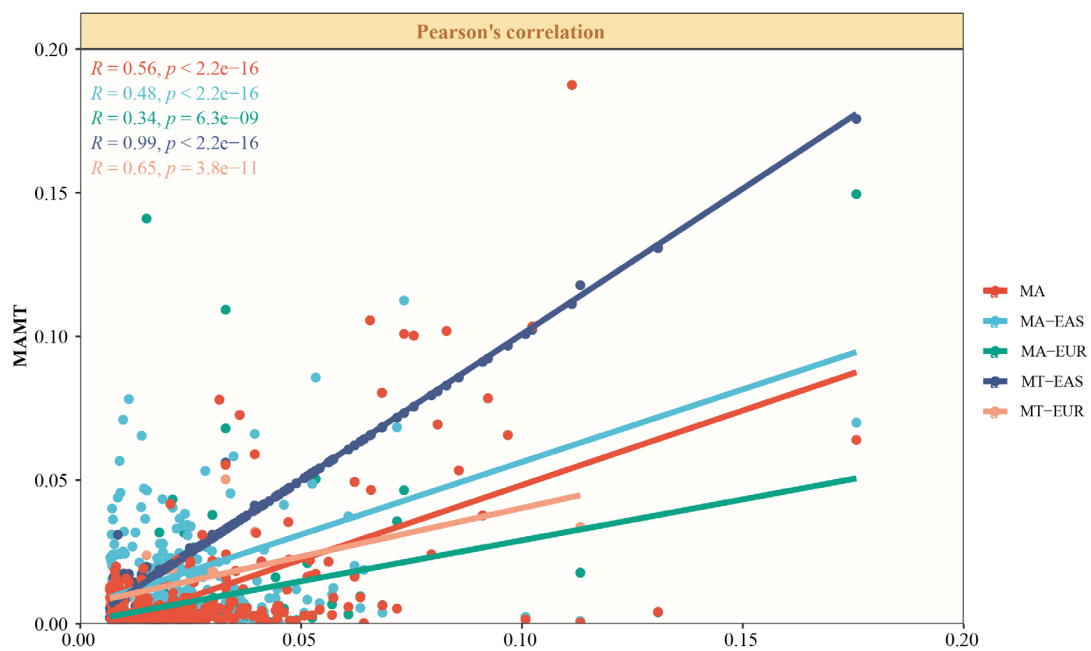

Supplement: Supplementary file 1 [file ddf1ae3f5ea8d3dda49815a9.pdf]
